# Supplementary material for: Transcriptome Analysis Reveals Different Responsive Patterns to Nitrogen Deficiency in Two Wheat Near-Isogenic Lines Contrasting for Nitrogen Use Efficiency
Source: Biology (Basel). 2021 Nov 3;10(11):1126. doi: 10.3390/biology10111126 (PMC8614915; doi:10.3390/biology10111126)
Supplement: Supplementary file 1 [file biology-10-01126-s001.zip]

Archive with 6 entries (6 files):
- Fig.pdf
- Table S1 .xlsx
- Table S2.xlsx
- Table S3.xlsx
- Table S4.xlsx
- Table S5.xlsx
