# Supplementary material for: Transcriptome Analysis Reveals Different Responsive Patterns to Nitrogen Deficiency in Two Wheat Near-Isogenic Lines Contrasting for Nitrogen Use Efficiency
Source: Biology (Basel). 2021 Nov 3;10(11):1126. doi: 10.3390/biology10111126 (PMC8614915; doi:10.3390/biology10111126)
Supplement: Supplementary file 1 [file biology-10-01126-s001.zip › Fig.pdf]

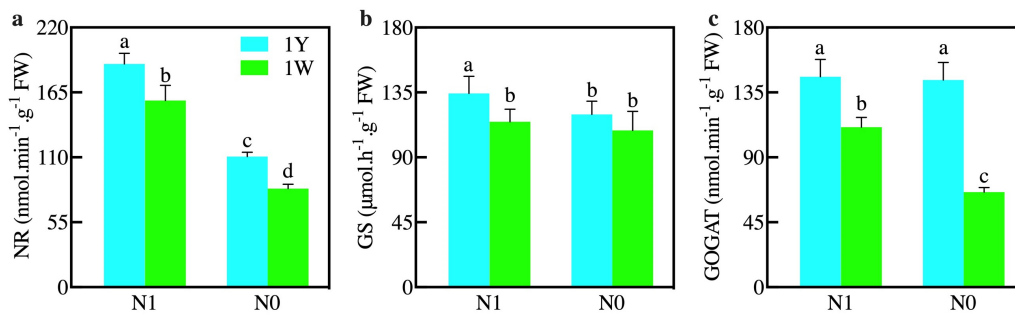

**Figure S1** The activities of key enzymes related with N metabolism in the leaves of two wheat NILs under different N treatments. The error bars are the means  $\pm$  SE ( $n = 3$ ), and different letters represent significant difference ( $p < 0.05$ ).

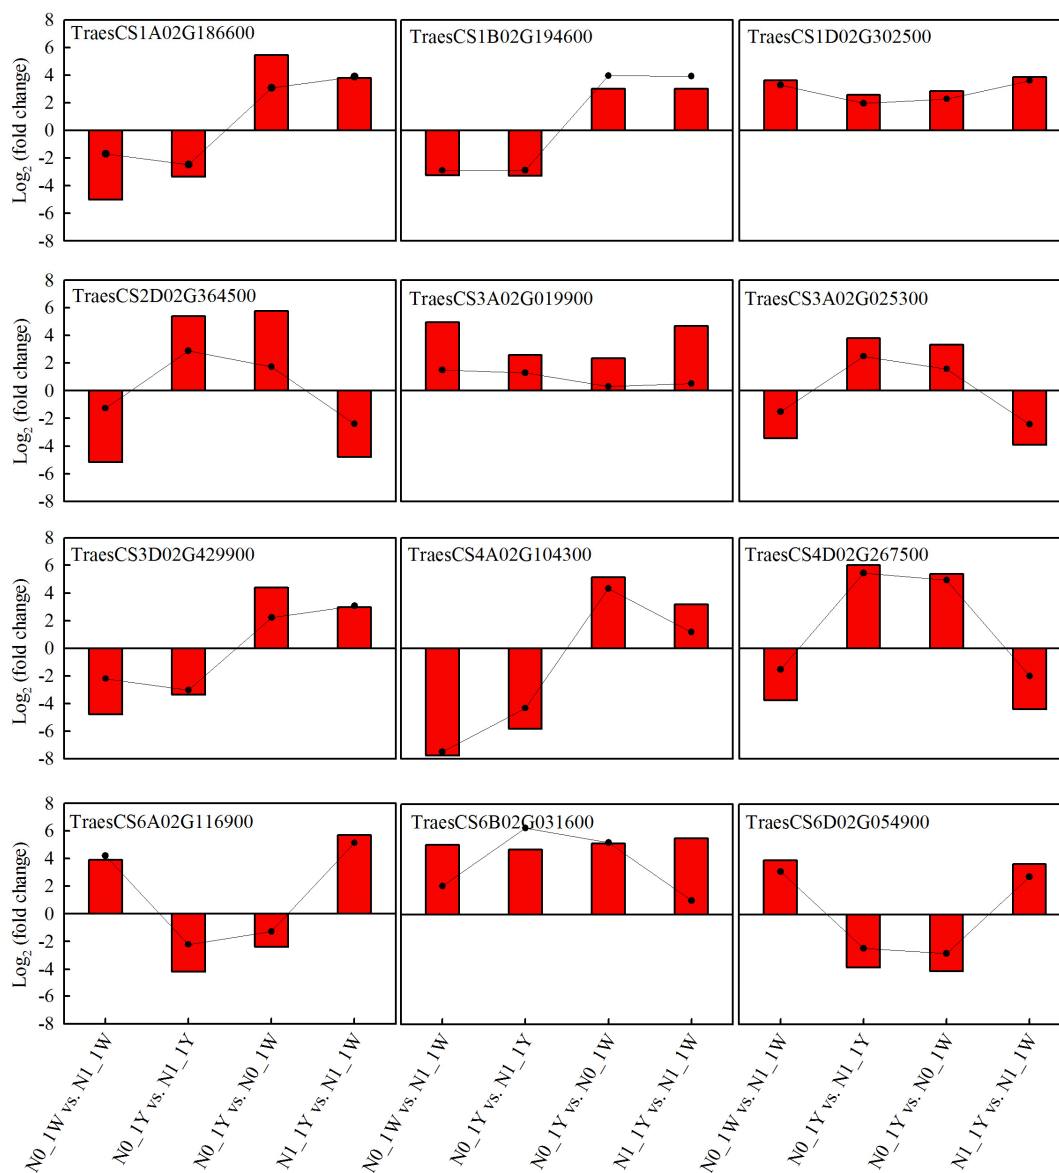

**Figure S2** qRT-PCR validation of the RNA-seq data of the 12 randomly selected DEGs. The y-axis represents the gene relative expression levels. The red columns represent relative expression obtained by RNA-Seq, and the black solid lines represent relative expression obtained by qRT-PCR.

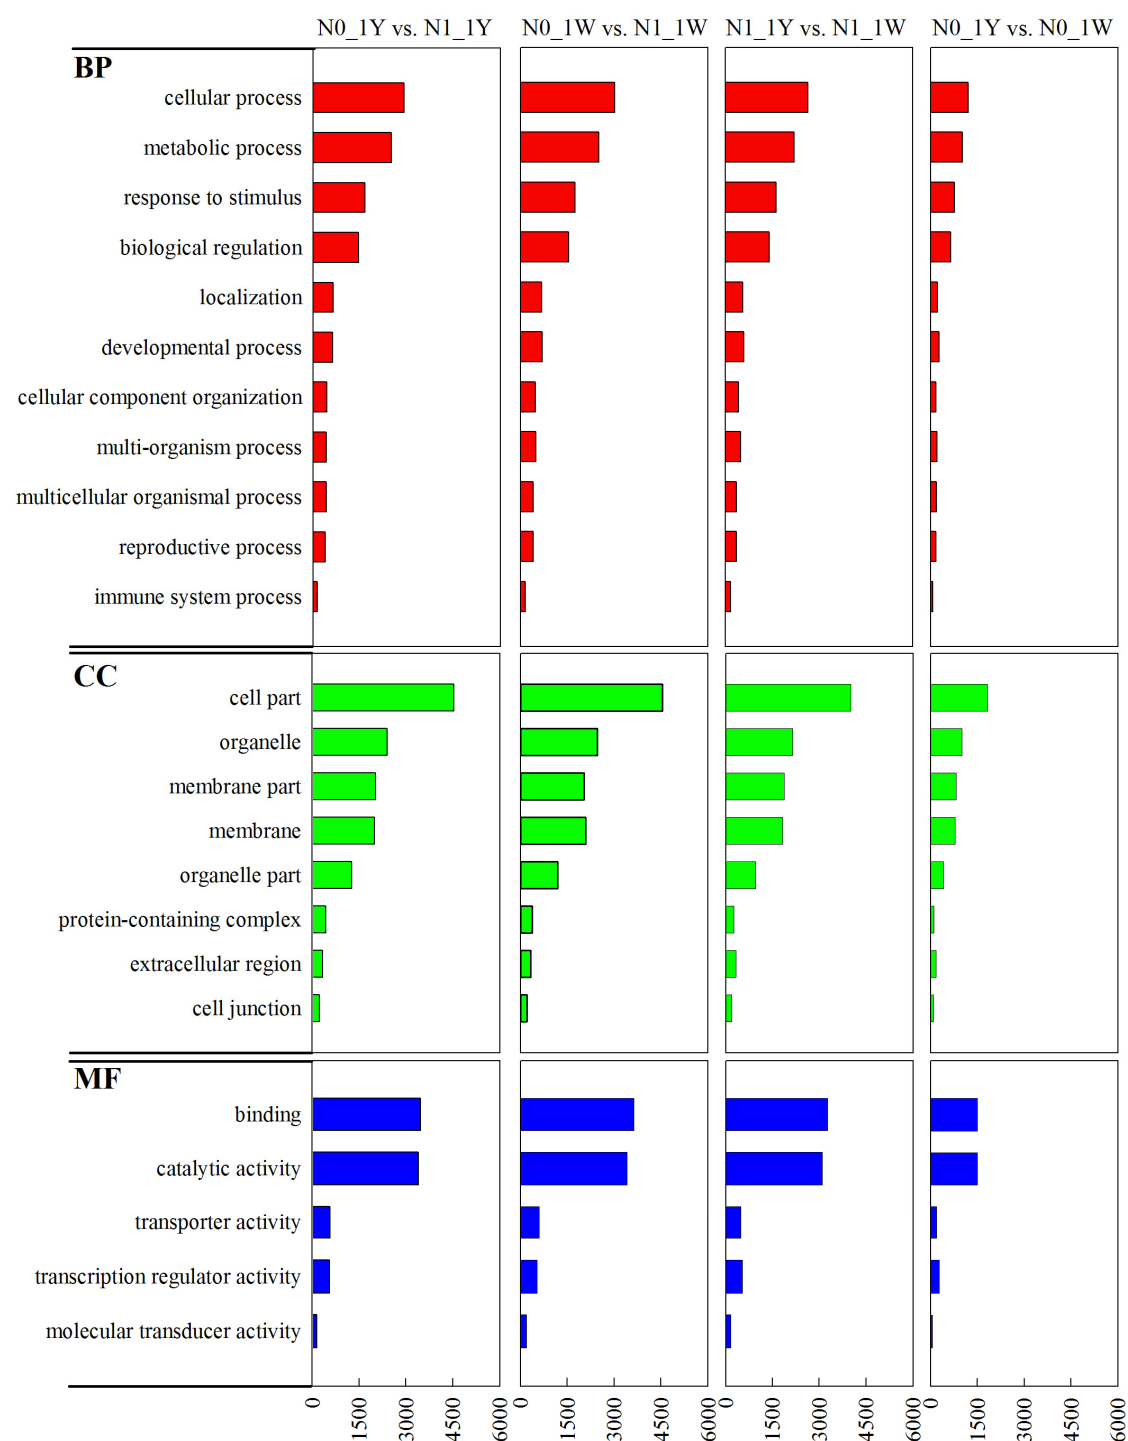

**Figure S3.** Distribution of DEGs among the GO terms in the three main categories. The  $x$ -axis shows the number of DEGs contained in each GO category, and the  $y$ -axis represents three main categories: biological process (BP), cellular component (CC), molecular function (MF).

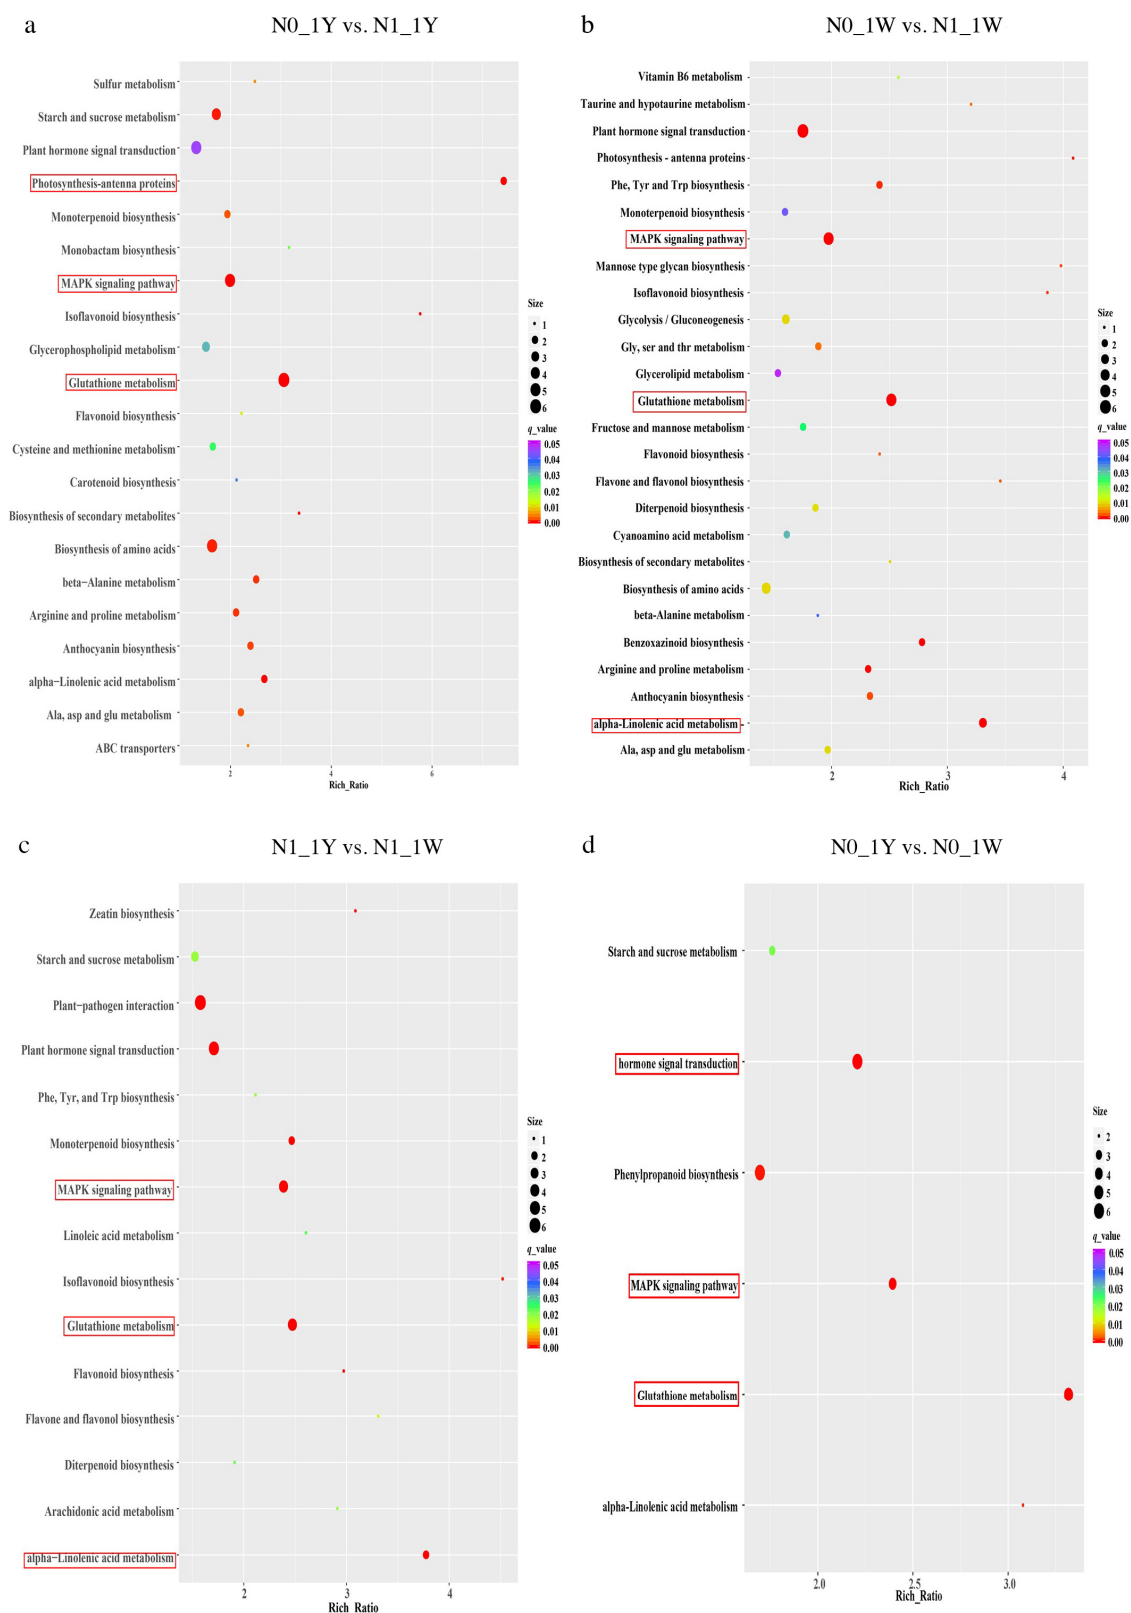

**Figure S4.** Analysis of KEGG enrichment in four pairwise groups. The  $x$ -axis indicates the Rich ratio, the  $y$ -axis represents the name of the KEGG pathway. The sizes of bubbles represent the number of DEGs of the pathway, and the colors of the bubbles represent the  $q$ -value. The color ratios and annotation are shown on the right side of the figure.

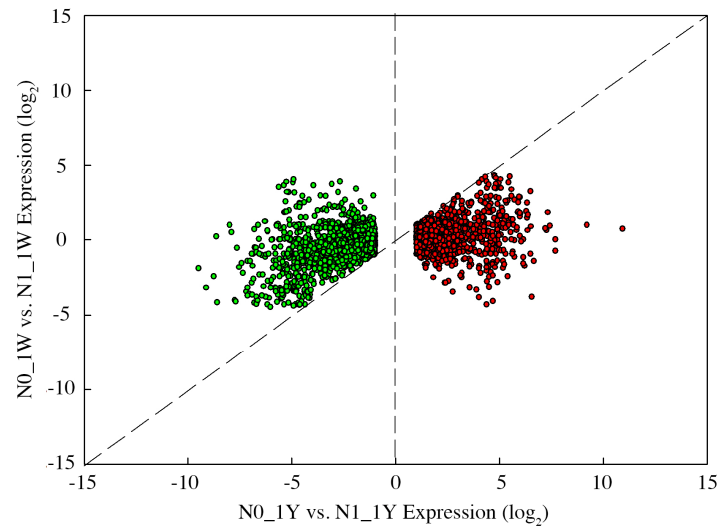

**Figure S5.** Scatter plot comparing the expression levels for the 4534 genes specifically expressed in the N0\_1Y vs. N1\_1Y comparison between N treatments in each wheat NIL. Each point represents an individual DEG, the red and green colors of the graph represent the genes that are upregulated or downregulated.

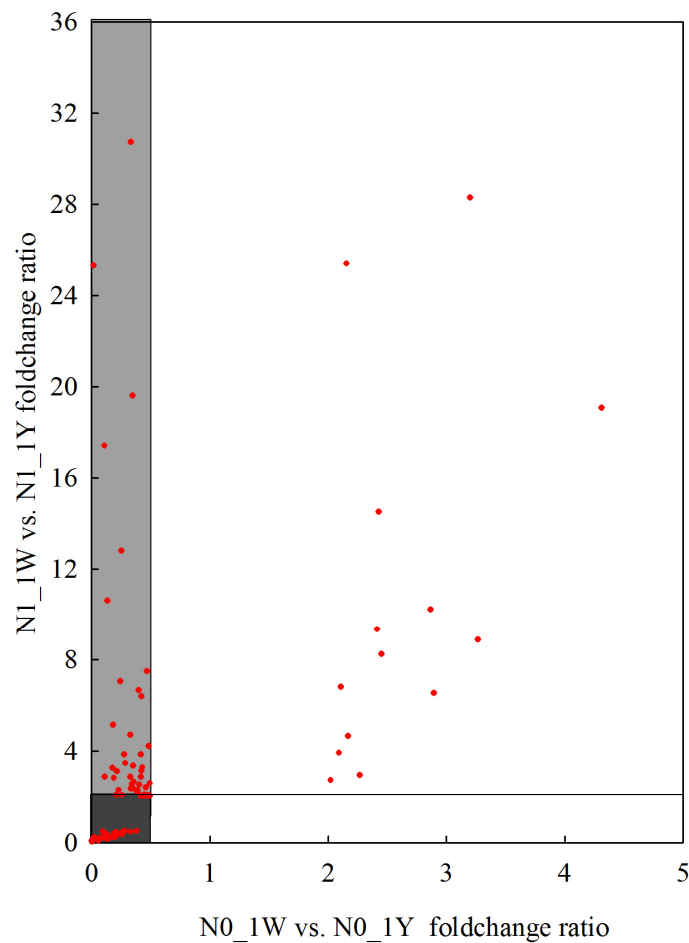

**Figure S6.** Scatter plot comparing the relative expression ratio for the 95 upregulated genes specifically expressed in the N0\_1Y vs. N1\_1Y comparison between wheat NILs under each N treatment. Each point represents an individual DEG, and the lighter section of the diagram shows the genes that are potentially frontloaded in expression.

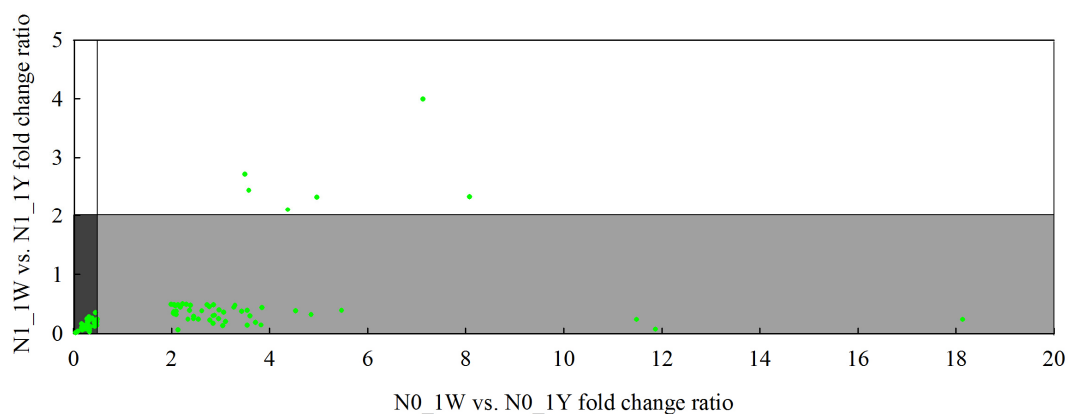

**Figure S7.** Scatter plot comparing the relative expression ratio for the 93 downregulated genes specifically expressed in the N0\_1Y vs. N1\_1Y comparison between wheat NILs under each N treatment. Each point represents an individual DEG, the lighter section of the diagram shows the genes that are potentially relatively upregulated in expression.

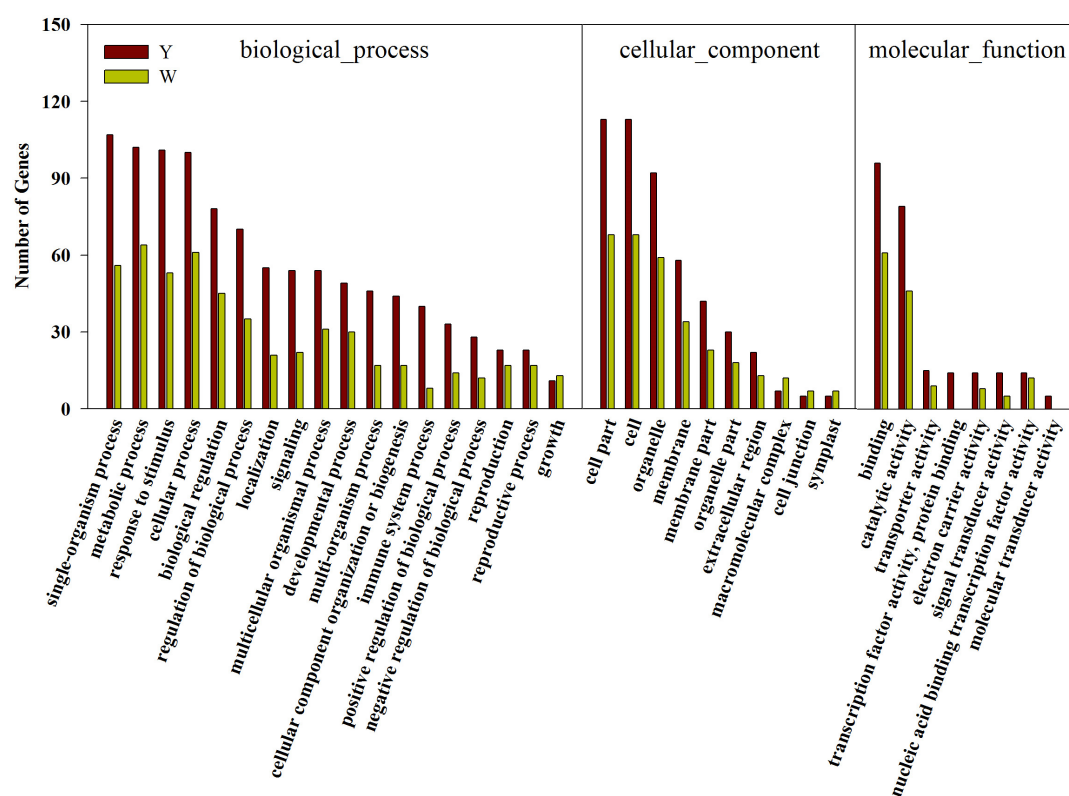

**Figure S8.** Comparison of GO classifications of DEGs between the two wheat NILs. The three main GO categories included biological process, cellular component, and molecular function.

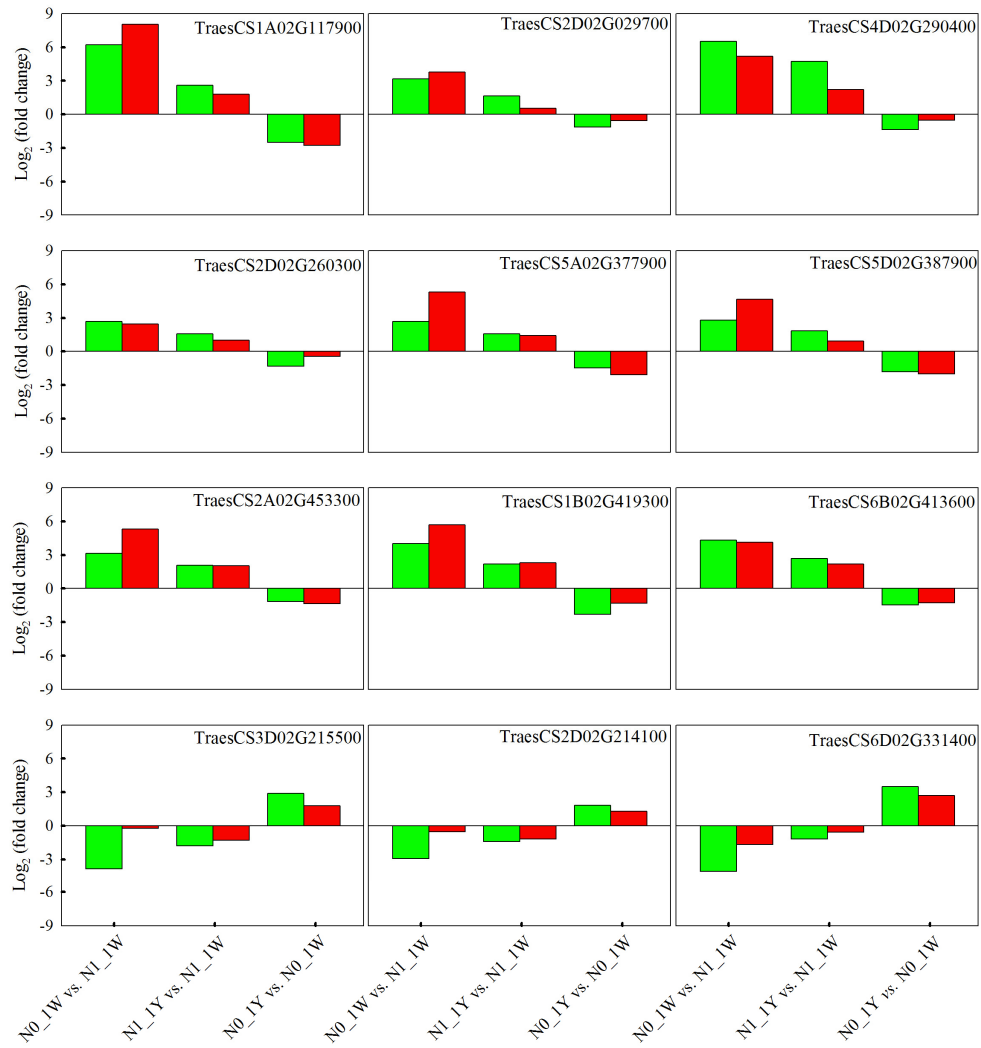

**Figure S9.** Validation of 12 potential DEGs identified from transcriptome analysis by qRT-PCR. The green column represents the gene relative expression levels in the RNA-Seq data, and the red column represents relative expression obtained by qRT-PCR.

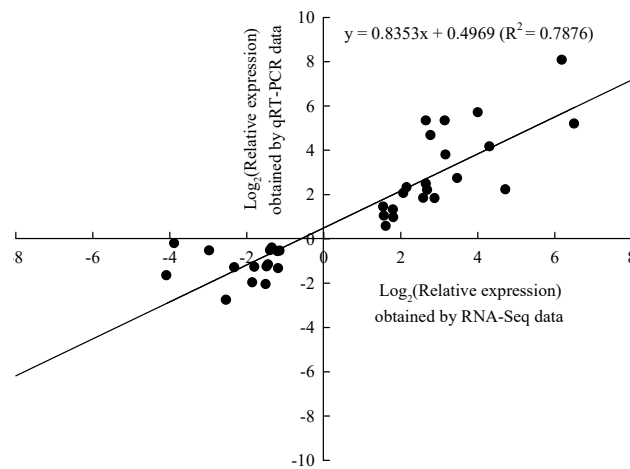

**Figure S10.** Gene expression correlation between the qRT-PCR and RNA-seq data. Each point represents a DEG, the  $x$ -axis stands for gene expression fold change in RNA-Seq, and the  $y$ -axis stands for gene expression fold change in qRT-PCR.
