# Supplementary material for: Transcriptome Analysis Reveals Different Responsive Patterns to Nitrogen Deficiency in Two Wheat Near-Isogenic Lines Contrasting for Nitrogen Use Efficiency
Source: Biology (Basel). 2021 Nov 3;10(11):1126. doi: 10.3390/biology10111126 (PMC8614915; doi:10.3390/biology10111126)
Supplement: Supplementary file 1 [file biology-10-01126-s001.zip › Table S1 .xlsx]

## Sheet: Sheet1
Table S1: Primer sequences used in this study.
Gene ID	Description	Primer sequence (From 5‘ to 3')
TraesCS1A02G186600	Probable glutathione S-transferase GSTU6	GCCTGCTCTCCTGGTTGATT
		TTGGCAAATTCGACCACCCT
TraesCS1B02G194600	Probable glutathione S-transferase GSTU6	AGCTTCGAGGATGTCGAGGA
		TTTTCCGTTGTGGACGAGCA
TraesCS1D02G302500	Cytochrome P450 714D1	CCTCATGGGAAACCTCTCGG
		AGGCTTTCCTCCACTTGTCG
TraesCS2D02G364500	Peroxygenase	TGTGAGCAAGGGAGAGTGGA
		GCGATGAACTCGAACAGGCT
TraesCS3A02G019900	CSC1-like protein ERD4	ACTTTGCTCTGGGTTGGCTT
		TGCAGGATAGAAGCGTGCAT
TraesCS3A02G025300	GDSL esterase/lipase At3g26430	CCATGGCCACCAACAAACTC
		AGTTGAAGATCGCCGGGAAG
TraesCS3D02G429900	Probable glutathione S-transferase GSTU6	ATCGATGACAAGGCTGTCCC
		AGGTCGAGGTAACCGATGGA
TraesCS4A02G104300	Protein IN2-1	ACCAAAGCACTCTACTCGCC
		CCAAGATCGTCACGTAGGCA
TraesCS4D02G267500	Ethylene-responsive transcription factor RAP2-4	CTGACGCCGATTTCTTTCCC
		CATGGAGCCTCCGAGAAATCA
TraesCS6A02G116900	predicted protein, partial	CAAGTGGGCATTAGCGTGC
		CAGGGAGAGGTTGTACCCGA
TraesCS6B02G031600	Sucrose:sucrose 1-fructosyltransferase	AAGACGTTCTACGATCCGGC
		AAGGCTGAGTGGAAAGACGG
TraesCS6D02G054900	Peroxidase 70	CTTCCGCGACCACATCTACA
		CGACCAGGTTGCGGTAGTAG
TraesCS1A02G117900	UDP-glycosyltransferase 73C2	ACTTTGCCGACCAGTTCCTC
		TCCTTACGACATCGTCTGCC
TraesCS2D02G029700	Cytochrome P450 99A2	ACTACTTGCCATTCGGGAGC
		TTCCATGTCCAGCTCACTCG
TraesCS4D02G290400	Cytochrome P450 716B1	TCTTCGTTCTCAAGGTGCCC
		AGCAGAAGTCGTCTCGTGTG
TraesCS2D02G260300	Peroxidase 51	GCACCTCTTCTTCCACGACT
		GACTAGTATGTCGGCGCAGG
TraesCS5A02G377900	CBL-interacting protein kinase 7	ATCATAAGCATGTCGCCGGG
		ACTCCTTTCTTGCCCACCAT
TraesCS5D02G387900	CBL-interacting protein kinase 7	ATCATAAGCATGTCGCCGGG
		ACTCCTTTCTTGCCCACCAT
TraesCS2A02G453300	Receptor-like protein kinase FERONIA	TCCGCCTCTACTTCTACCCG
		AGCTGACGTTGAGGGAGAAC
TraesCS1B02G419300	Mitogen-activated protein kinase kinase 9	AAGTCGCTTTCCAACTCCGAT
		AGGCAAGGACAGGAGTCCAC
TraesCS6B02G413600	Phosphoenolpyruvate carboxylase kinase 1	GACAATCTGCTCTTCGACGC
		CCGGAGAGCATCACGTAGAG
TraesCS3D02G215500	Leucine-rich repeat extensin-like protein 4	CGTCTTCCACGTCAACTCCA
		TCGAACTCGTTGTAGCGGAG
TraesCS2D02G214100	NAC transcription factor NAM-B2	CGATAAACGCCATGCCTCCA
		ATTCCAGTTCACGCCGGATA
TraesCS6D02G331400	Amino acid transporter AVT1A	ATACCTTTCAGCCGGTGGTG
		CACTTTACTGCTTCCCCGGT
GAPDH	Internal reference gene	CAACGCTAGCTGCACCACTAACT
		GACTCCTCCTTGATAGCAGCCTT
