# Supplementary material for: Transcriptome Analysis Reveals Different Responsive Patterns to Nitrogen Deficiency in Two Wheat Near-Isogenic Lines Contrasting for Nitrogen Use Efficiency
Source: Biology (Basel). 2021 Nov 3;10(11):1126. doi: 10.3390/biology10111126 (PMC8614915; doi:10.3390/biology10111126)
Supplement: Supplementary file 1 [file biology-10-01126-s001.zip › Table S2.xlsx]

## Sheet: N0_1Y vs. N1_1Y
Table S2: Analysis of the differentially expressed genes (DEGs) in pairwise comparisons
Up-regulated							Down-regulated
Gene	FoldChange	Log2FoldChange	pval	padj	Up/Down		Gene	FoldChange	Log2FoldChange	pval	padj	Up/Down
ENSRNA050013963	28.3937	4.8275	0.00359805	0.0152767	up		ENSRNA050009148	0.332762	-1.58744	2.62038e-05	0.000180817	down
TraesCS1A02G004000	4.71152	2.23619	0.00185799	0.00856199	up		ENSRNA050016680	0.296317	-1.75479	4.74848e-08	4.78006e-07	down
TraesCS1A02G005200	4.01698	2.00611	1.41394e-07	1.34054e-06	up		ENSRNA050019315	0.160882	-2.63592	0.000736541	0.00377186	down
TraesCS1A02G005500	6.95552	2.79816	1.05746e-12	1.66873e-11	up		ENSRNA050021557	0.258723	-1.95052	8.72659e-06	6.51739e-05	down
TraesCS1A02G005700	2.71176	1.43923	0.00335144	0.0143703	up		ENSRNA050021560	0.285982	-1.806	2.13582e-08	2.23626e-07	down
TraesCS1A02G005800	2.4947	1.31887	1.58447e-22	4.54444e-21	up		ENSRNA050022801	0.421923	-1.24495	2.87583e-05	0.000196988	down
TraesCS1A02G006200	3.1447	1.65292	0.000396033	0.00216068	up		ENSRNA050023641	0.307504	-1.70132	2.19683e-05	0.000153429	down
TraesCS1A02G006300	5.60769	2.48741	7.7221e-12	1.13405e-10	up		ENSRNA050024590	0.318	-1.6529	0.0038963	0.0163771	down
TraesCS1A02G006800	4.06586	2.02356	2.22288e-34	1.00547e-32	up		ENSRNA050024732	0.375805	-1.41195	0.00880369	0.0331197	down
TraesCS1A02G008400	2.32648	1.21815	2.07157e-06	1.69622e-05	up		TraesCS1A02G007500	0.416051	-1.26517	1.29362e-16	2.67257e-15	down
TraesCS1A02G008500	3.72246	1.89626	0.00544126	0.0219041	up		TraesCS1A02G007800	0.20939	-2.25574	0.00106016	0.0052134	down
TraesCS1A02G008600	82.084	6.35903	2.64336e-06	2.13461e-05	up		TraesCS1A02G015100	0.480668	-1.05689	6.37976e-13	1.02247e-11	down
TraesCS1A02G010200	3.07114	1.61877	0.00310053	0.0134498	up		TraesCS1A02G015500	0.0163224	-5.937	5.4554e-05	0.000355201	down
TraesCS1A02G015400	3.98155	1.99333	2.12118e-05	0.000148415	up		TraesCS1A02G016200	0.435413	-1.19955	0.00779529	0.0298976	down
TraesCS1A02G016100	5.62966	2.49305	0.000231593	0.00132415	up		TraesCS1A02G021200	0.257098	-1.95961	0.00011652	0.000714131	down
TraesCS1A02G025500	2.59734	1.37704	1.76172e-31	7.25497e-30	up		TraesCS1A02G021400	0.214328	-2.22211	0.0012722	0.00614813	down
TraesCS1A02G026400	2.00506	1.00365	1.51364e-05	0.000108482	up		TraesCS1A02G027600	0.397512	-1.33093	0.00059397	0.00310344	down
TraesCS1A02G034900	3.42245	1.77503	2.85827e-12	4.35219e-11	up		TraesCS1A02G030000	0.281033	-1.83119	3.89376e-98	7.63958e-96	down
TraesCS1A02G036100	2.68193	1.42327	1.67497e-34	7.60429e-33	up		TraesCS1A02G032900	0.0223448	-5.48392	5.17598e-09	5.82955e-08	down
TraesCS1A02G037700	2.92745	1.54965	0.00924443	0.0345248	up		TraesCS1A02G033500	0.352596	-1.50391	0.000484683	0.00258818	down
TraesCS1A02G047200	2.61622	1.38748	0.00546987	0.0220049	up		TraesCS1A02G054400	0.356887	-1.48646	3.57566e-05	0.000240513	down
TraesCS1A02G050100	2.24616	1.16746	7.06567e-09	7.83891e-08	up		TraesCS1A02G056200	0.222777	-2.16633	4.18214e-10	5.25279e-09	down
TraesCS1A02G059200	6.21865	2.6366	1.74482e-31	7.19019e-30	up		TraesCS1A02G056700	0.0401283	-4.63924	0.0116855	0.0421344	down
TraesCS1A02G066900	2.19706	1.13558	4.30553e-38	2.20491e-36	up		TraesCS1A02G057200	0.137996	-2.8573	1.85644e-45	1.18887e-43	down
TraesCS1A02G069300	11.9487	3.57879	3.38277e-12	5.11417e-11	up		TraesCS1A02G059100	0.326437	-1.61512	0.00587443	0.0234243	down
TraesCS1A02G076500	2.62517	1.39241	1.46136e-09	1.7451e-08	up		TraesCS1A02G065300	0.290794	-1.78193	1.84734e-86	3.05118e-84	down
TraesCS1A02G079800	2.29075	1.19582	1.1717e-13	1.98528e-12	up		TraesCS1A02G065400	0.466024	-1.10152	1.32178e-07	1.2582e-06	down
TraesCS1A02G084600	3.67708	1.87856	1.74824e-08	1.85185e-07	up		TraesCS1A02G070900	0.0498529	-4.32618	1.44344e-12	2.2513e-11	down
TraesCS1A02G098900	3.80766	1.92891	2.84795e-15	5.37706e-14	up		TraesCS1A02G072000	0.25637	-1.9637	2.33946e-131	7.3161e-129	down
TraesCS1A02G100300	2.90912	1.54058	1.19019e-08	1.28571e-07	up		TraesCS1A02G072100	0.392771	-1.34824	0.00618601	0.0244985	down
TraesCS1A02G108400	3.77916	1.91807	2.70064e-05	0.000185918	up		TraesCS1A02G072200	0.359309	-1.4767	7.13394e-21	1.8887e-19	down
TraesCS1A02G108800	2.43859	1.28605	0.0013696	0.00656477	up		TraesCS1A02G074800	0.44379	-1.17205	2.52196e-09	2.93983e-08	down
TraesCS1A02G113600	9.05721	3.17907	3.36609e-06	2.6758e-05	up		TraesCS1A02G075800	0.31979	-1.6448	8.3281e-07	7.18282e-06	down
TraesCS1A02G117700	2.32431	1.2168	9.42254e-08	9.16474e-07	up		TraesCS1A02G076200	0.0209142	-5.57937	0.000295845	0.00165662	down
TraesCS1A02G122100	2.33559	1.22379	2.62109e-16	5.32402e-15	up		TraesCS1A02G078800	0.123471	-3.01775	0	0	down
TraesCS1A02G141300	2.16778	1.11622	0.013897	0.0487975	up		TraesCS1A02G079900	0.108607	-3.20281	0.00230102	0.0103142	down
TraesCS1A02G141700	2.57792	1.36621	1.27015e-11	1.83341e-10	up		TraesCS1A02G081200	0.254359	-1.97506	8.1595e-05	0.000514832	down
TraesCS1A02G142400	5.37943	2.42745	4.12462e-23	1.20773e-21	up		TraesCS1A02G081300	0.361547	-1.46774	5.38572e-42	3.15098e-40	down
TraesCS1A02G143200	2.51486	1.33048	0.00298226	0.0130009	up		TraesCS1A02G082500	0.453034	-1.14231	3.67747e-13	5.99994e-12	down
TraesCS1A02G145800	2.10341	1.07273	9.76096e-18	2.16857e-16	up		TraesCS1A02G083000	0.158017	-2.66185	6.45889e-09	7.19034e-08	down
TraesCS1A02G151600	4.49172	2.16727	9.28528e-06	6.89535e-05	up		TraesCS1A02G084400	0.279365	-1.83978	0.000412367	0.00223988	down
TraesCS1A02G156400	2.54418	1.3472	2.72199e-05	0.000187221	up		TraesCS1A02G086200	0.48798	-1.03511	1.30604e-47	8.91045e-46	down
TraesCS1A02G158600	2.00146	1.00106	3.67022e-18	8.37449e-17	up		TraesCS1A02G088600	0.290382	-1.78398	0.00130068	0.00627005	down
TraesCS1A02G177000	2.63755	1.3992	1.53544e-21	4.23617e-20	up		TraesCS1A02G089800	0.433219	-1.20683	9.61599e-07	8.23481e-06	down
TraesCS1A02G177600	2.12833	1.08972	0.000640451	0.00332291	up		TraesCS1A02G094900	0.0671743	-3.89595	4.80093e-12	7.17716e-11	down
TraesCS1A02G183000	2.32305	1.21602	0.000421359	0.00228349	up		TraesCS1A02G097000	0.41211	-1.2789	4.99758e-46	3.25461e-44	down
TraesCS1A02G188000	3.94319	1.97936	3.78719e-63	3.78762e-61	up		TraesCS1A02G101300	0.435729	-1.1985	0.000134277	0.000810223	down
TraesCS1A02G193100	4.22306	2.07829	1.74442e-13	2.91717e-12	up		TraesCS1A02G102700	0.120691	-3.05061	1.64116e-25	5.39812e-24	down
TraesCS1A02G198300	2.44337	1.28887	4.92001e-19	1.17483e-17	up		TraesCS1A02G102800	0.300279	-1.73562	2.78619e-35	1.29742e-33	down
TraesCS1A02G207300	16.8192	4.07204	0.0091823	0.0343178	up		TraesCS1A02G106700	0.295225	-1.76011	0.00279813	0.0122711	down
TraesCS1A02G207600	19.9576	4.31886	0.00560363	0.0224945	up		TraesCS1A02G112500	0.388322	-1.36467	3.11142e-129	9.53659e-127	down
TraesCS1A02G207900	2.22534	1.15403	9.47067e-14	1.61713e-12	up		TraesCS1A02G113100	0.201537	-2.31088	1.40145e-05	0.000100981	down
TraesCS1A02G209100	3.5558	1.83018	6.36487e-89	1.08321e-86	up		TraesCS1A02G113300	0.458893	-1.12377	0.000249777	0.00141871	down
TraesCS1A02G210400	5.73064	2.5187	4.56149e-59	4.19433e-57	up		TraesCS1A02G115000	0.433972	-1.20433	8.68797e-28	3.13556e-26	down
TraesCS1A02G218600	17.6372	4.14055	0.00747024	0.0288214	up		TraesCS1A02G115200	0.309367	-1.69261	5.90766e-33	2.54869e-31	down
TraesCS1A02G228100	2.64124	1.40121	8.17715e-06	6.12933e-05	up		TraesCS1A02G115400	0.382224	-1.38751	0.0010579	0.00520436	down
TraesCS1A02G235100	2.07933	1.05612	3.01349e-05	0.00020564	up		TraesCS1A02G115500	0.469781	-1.08994	0.000533912	0.0028222	down
TraesCS1A02G235200	2.84585	1.50886	5.66257e-08	5.6458e-07	up		TraesCS1A02G115600	0.051083	-4.29101	1.37806e-07	1.30794e-06	down
TraesCS1A02G239500	5.39009	2.43031	1.19667e-24	3.78458e-23	up		TraesCS1A02G119600	0.101801	-3.29617	1.17395e-25	3.89045e-24	down
TraesCS1A02G243000	3.37676	1.75564	2.1424e-24	6.69984e-23	up		TraesCS1A02G119800	0.195483	-2.35489	1.42355e-09	1.70127e-08	down
TraesCS1A02G248300	3.52505	1.81764	2.74529e-48	1.89182e-46	up		TraesCS1A02G121800	0.324789	-1.62243	1.73625e-49	1.23802e-47	down
TraesCS1A02G253200	4.04002	2.01436	9.37442e-14	1.60114e-12	up		TraesCS1A02G125400	0.316806	-1.65833	1.9194e-23	5.72356e-22	down
TraesCS1A02G256700	28.4468	4.8302	0.00357228	0.0151809	up		TraesCS1A02G125500	0.448692	-1.1562	7.97205e-10	9.76992e-09	down
TraesCS1A02G257700	22.3858	4.48451	0.00997846	0.036844	up		TraesCS1A02G127500	0.0761454	-3.7151	0.00653113	0.0256789	down
TraesCS1A02G268900	2.17899	1.12366	0.000174876	0.00102821	up		TraesCS1A02G129800	0.378736	-1.40073	0.000103477	0.000640116	down
TraesCS1A02G278900	3.49183	1.80398	1.16046e-20	3.03449e-19	up		TraesCS1A02G133900	0.419942	-1.25174	2.73135e-08	2.8257e-07	down
TraesCS1A02G279000	2.83674	1.50424	1.11919e-05	8.18492e-05	up		TraesCS1A02G134100	0.144553	-2.79033	1.28408e-16	2.65374e-15	down
TraesCS1A02G281200	7.40061	2.88764	0.0030196	0.0131422	up		TraesCS1A02G140700	0.40851	-1.29156	3.18311e-08	3.26293e-07	down
TraesCS1A02G282200	2.08401	1.05936	0.00803602	0.0306947	up		TraesCS1A02G141900	0.475119	-1.07364	4.02156e-07	3.61108e-06	down
TraesCS1A02G287300	4.32105	2.11138	0.000258373	0.00146463	up		TraesCS1A02G142900	0.409465	-1.28819	0.0023098	0.0103506	down
TraesCS1A02G288500	2.23859	1.16259	0.000408817	0.00222339	up		TraesCS1A02G143300	0.484772	-1.04462	3.06702e-09	3.54703e-08	down
TraesCS1A02G289100	2.64582	1.40371	4.11002e-06	3.22555e-05	up		TraesCS1A02G147400	0.167306	-2.57944	6.35475e-09	7.07823e-08	down
TraesCS1A02G289600	2.60342	1.38041	0.000163853	0.000969133	up		TraesCS1A02G149500	0.122022	-3.03479	0.000750596	0.00383369	down
TraesCS1A02G289900	4.80625	2.26491	2.32772e-35	1.08722e-33	up		TraesCS1A02G149700	0.360748	-1.47093	2.61653e-37	1.31268e-35	down
TraesCS1A02G290200	5.62323	2.4914	1.64208e-07	1.54401e-06	up		TraesCS1A02G151500	0.475832	-1.07148	4.1512e-05	0.00027624	down
TraesCS1A02G299100	4.37493	2.12926	2.63987e-06	2.13224e-05	up		TraesCS1A02G152800	0.0382583	-4.70808	3.52245e-16	7.08248e-15	down
TraesCS1A02G301100	5.51859	2.4643	1.01647e-09	1.23441e-08	up		TraesCS1A02G157100	0.102524	-3.28597	0.000132982	0.000803118	down
TraesCS1A02G304900	6.94777	2.79655	1.63912e-11	2.34186e-10	up		TraesCS1A02G157900	0.0733056	-3.76993	2.10929e-49	1.49708e-47	down
TraesCS1A02G310600	3.84528	1.94309	3.29681e-64	3.36269e-62	up		TraesCS1A02G159600	0.0239239	-5.3854	0.000626003	0.00325645	down
TraesCS1A02G312300	2.51337	1.32962	4.68655e-12	7.01469e-11	up		TraesCS1A02G164600	0.126644	-2.98115	2.95395e-25	9.55297e-24	down
TraesCS1A02G314500	26.6939	4.73844	5.41984e-20	1.36342e-18	up		TraesCS1A02G165700	0.479907	-1.05917	1.61139e-39	8.7158e-38	down
TraesCS1A02G314800	113.132	6.82186	2.15197e-32	9.15582e-31	up		TraesCS1A02G166600	0.0438778	-4.51037	3.68973e-11	5.10816e-10	down
TraesCS1A02G314900	50.2349	5.65062	3.90629e-99	7.76307e-97	up		TraesCS1A02G169500	0.33794	-1.56516	1.38444e-06	1.16121e-05	down
TraesCS1A02G325700	31.3087	4.96849	0.00195048	0.00893273	up		TraesCS1A02G173100	0.474408	-1.0758	8.21813e-15	1.50593e-13	down
TraesCS1A02G326000	8.77876	3.13402	4.13082e-21	1.10888e-19	up		TraesCS1A02G173700	0.447934	-1.15864	1.34986e-14	2.43588e-13	down
TraesCS1A02G329600	9.6559	3.27141	0.00408659	0.0170721	up		TraesCS1A02G179400	0.0477335	-4.38885	2.36236e-68	2.58964e-66	down
TraesCS1A02G330900	2.5704	1.36199	1.19078e-19	2.94146e-18	up		TraesCS1A02G180000	0.110001	-3.18441	5.77904e-12	8.59144e-11	down
TraesCS1A02G340300	2.36727	1.24323	2.2728e-09	2.66134e-08	up		TraesCS1A02G180400	0.398275	-1.32816	0.0140487	0.0492347	down
TraesCS1A02G341200	2.92995	1.55087	0.0005063	0.00268963	up		TraesCS1A02G186100	0.284931	-1.81132	5.02047e-178	2.81178e-175	down
TraesCS1A02G342900	2.13039	1.09112	7.61163e-35	3.49426e-33	up		TraesCS1A02G186400	0.42296	-1.24141	2.47078e-36	1.20235e-34	down
TraesCS1A02G343000	2.14463	1.10073	1.85993e-35	8.70045e-34	up		TraesCS1A02G186500	0.44821	-1.15775	3.34783e-26	1.13574e-24	down
TraesCS1A02G347700	4.05972	2.02138	4.54819e-21	1.21773e-19	up		TraesCS1A02G186600	0.0979397	-3.35196	4.39509e-56	3.72446e-54	down
TraesCS1A02G349900	31.2439	4.9655	1.4198e-19	3.4918e-18	up		TraesCS1A02G188600	0.44427	-1.17049	0.000162852	0.000963954	down
TraesCS1A02G351000	10.0108	3.32349	6.9031e-11	9.34269e-10	up		TraesCS1A02G191800	0.453766	-1.13998	9.07653e-18	2.02088e-16	down
TraesCS1A02G351600	4.06152	2.02202	1.77725e-29	6.88621e-28	up		TraesCS1A02G192300	0.342501	-1.54582	1.46474e-41	8.46514e-40	down
TraesCS1A02G354200	6.75103	2.75511	0.00966806	0.0358678	up		TraesCS1A02G194900	0.347818	-1.52359	2.91596e-56	2.49505e-54	down
TraesCS1A02G355600	25.3203	4.66222	0.00119817	0.00582005	up		TraesCS1A02G198500	0.415947	-1.26553	2.77434e-53	2.18566e-51	down
TraesCS1A02G356900	2.70184	1.43394	2.10183e-32	8.94868e-31	up		TraesCS1A02G202000	0.405927	-1.30071	0.00305791	0.0132883	down
TraesCS1A02G365800	2.7485	1.45864	8.56835e-45	5.39745e-43	up		TraesCS1A02G203600	0.201153	-2.31364	1.78614e-55	1.48101e-53	down
TraesCS1A02G375000	2.94956	1.5605	0.00199486	0.0091042	up		TraesCS1A02G203700	0.0316088	-4.98353	6.00233e-09	6.70995e-08	down
TraesCS1A02G382200	3.84462	1.94284	3.69707e-15	6.9335e-14	up		TraesCS1A02G211000	0.419125	-1.25455	2.28525e-13	3.78869e-12	down
TraesCS1A02G385500	2.77768	1.47388	0.000229024	0.00131178	up		TraesCS1A02G211600	0.446492	-1.16329	0.00081469	0.00412209	down
TraesCS1A02G386500	3.44662	1.78518	0.00316149	0.0136777	up		TraesCS1A02G212000	0.0454871	-4.4584	1.65465e-05	0.000117793	down
TraesCS1A02G387400	5.16156	2.36781	0.00466802	0.0191811	up		TraesCS1A02G213700	0.0381477	-4.71226	0.00181802	0.0084017	down
TraesCS1A02G394200	8.95118	3.16208	0.0127467	0.045351	up		TraesCS1A02G218500	0.437646	-1.19216	6.36934e-09	7.0932e-08	down
TraesCS1A02G400900	25.4963	4.67222	0.00685031	0.0267937	up		TraesCS1A02G226600	0.487966	-1.03515	0.00423075	0.0175944	down
TraesCS1A02G402400	2.62496	1.3923	5.10708e-07	4.52512e-06	up		TraesCS1A02G228500	0.311838	-1.68113	1.2159e-19	2.99992e-18	down
TraesCS1A02G404800	45.8762	5.51967	2.94794e-39	1.57241e-37	up		TraesCS1A02G230100	0.494925	-1.01472	0.000462557	0.00248219	down
TraesCS1A02G404900	194.478	7.60346	4.99225e-10	6.23217e-09	up		TraesCS1A02G232500	0.471357	-1.08511	0.00380286	0.0160347	down
TraesCS1A02G405100	35.3206	5.14244	0.000291594	0.00163489	up		TraesCS1A02G235800	0.173474	-2.52721	1.13012e-38	5.91531e-37	down
TraesCS1A02G405200	80.2883	6.32712	7.28565e-06	5.49991e-05	up		TraesCS1A02G238700	0.176155	-2.50508	2.74529e-142	9.89061e-140	down
TraesCS1A02G405300	31.4846	4.97658	2.50587e-11	3.51981e-10	up		TraesCS1A02G238800	0.455017	-1.13601	2.98502e-20	7.63379e-19	down
TraesCS1A02G405400	5.7181	2.51554	0.000235417	0.00134452	up		TraesCS1A02G242400	0.279674	-1.83818	2.63791e-35	1.2293e-33	down
TraesCS1A02G409900	2.93215	1.55196	1.50273e-12	2.34139e-11	up		TraesCS1A02G248800	0.456606	-1.13098	1.04513e-17	2.31776e-16	down
TraesCS1A02G419100	2.42412	1.27746	1.38058e-17	3.0268e-16	up		TraesCS1A02G251900	0.292586	-1.77307	4.85662e-12	7.25689e-11	down
TraesCS1A02G419200	4.82346	2.27007	5.018e-36	2.40579e-34	up		TraesCS1A02G253000	0.490097	-1.02886	0.00112012	0.00547818	down
TraesCS1A02G419300	26.5097	4.72845	0.000138222	0.000832075	up		TraesCS1A02G254600	0.0236495	-5.40205	0.000609758	0.00317677	down
TraesCS1A02G419600	2.78346	1.47688	7.5334e-08	7.39618e-07	up		TraesCS1A02G256200	0.409555	-1.28787	0.005795	0.0231571	down
TraesCS1A02G421900	6.59242	2.72081	0.00078233	0.00397862	up		TraesCS1A02G257400	0.307896	-1.69948	0.000551563	0.00290528	down
TraesCS1A02G424100	25.6581	4.68134	1.73737e-06	1.43824e-05	up		TraesCS1A02G258800	0.188356	-2.40847	4.9184e-26	1.65578e-24	down
TraesCS1A02G427300	2.56173	1.35712	4.78312e-09	5.40983e-08	up		TraesCS1A02G260700	0.137727	-2.86012	5.29136e-05	0.000345433	down
TraesCS1A02G430000	3.00568	1.58769	1.44472e-05	0.000103917	up		TraesCS1A02G263100	0.0297915	-5.06896	1.93907e-09	2.28633e-08	down
TraesCS1A02G430400	2.44348	1.28894	1.16035e-12	1.82362e-11	up		TraesCS1A02G268400	0.263237	-1.92557	5.42777e-23	1.57879e-21	down
TraesCS1A02G437600	2.65943	1.41112	0.000611639	0.0031855	up		TraesCS1A02G268600	0.45041	-1.15069	9.36923e-26	3.11668e-24	down
TraesCS1A02G439000	3.68133	1.88023	8.67029e-19	2.04891e-17	up		TraesCS1A02G270900	0.402001	-1.31473	0.000464069	0.00248954	down
TraesCS1A02G442300	4.2927	2.10188	6.57914e-06	5.00149e-05	up		TraesCS1A02G271400	0.153621	-2.70255	2.14839e-06	1.75561e-05	down
TraesCS1B02G006500	3.69722	1.88644	1.26108e-73	1.55694e-71	up		TraesCS1A02G273900	0.420499	-1.24982	2.37923e-35	1.11043e-33	down
TraesCS1B02G007400	2.21198	1.14534	1.43959e-07	1.36318e-06	up		TraesCS1A02G277700	0.0933831	-3.42069	0.00082121	0.00415099	down
TraesCS1B02G007700	3.05568	1.61149	4.63023e-08	4.66941e-07	up		TraesCS1A02G279500	0.316197	-1.6611	4.85197e-21	1.29737e-19	down
TraesCS1B02G008000	2.00622	1.00448	1.7388e-09	2.06084e-08	up		TraesCS1A02G281000	0.429754	-1.21842	1.10354e-06	9.37214e-06	down
TraesCS1B02G016400	4.04935	2.01769	6.15382e-08	6.10595e-07	up		TraesCS1A02G282000	0.454933	-1.13627	5.25686e-05	0.000343471	down
TraesCS1B02G035500	2.31204	1.20917	0.00761327	0.029287	up		TraesCS1A02G285000	0.435832	-1.19816	5.46512e-06	4.20862e-05	down
TraesCS1B02G037800	2.02287	1.01641	0.00342985	0.0146463	up		TraesCS1A02G287200	0.114862	-3.12202	5.64838e-84	8.87703e-82	down
TraesCS1B02G043200	2.07816	1.05531	1.00025e-05	7.37726e-05	up		TraesCS1A02G287400	0.449707	-1.15294	1.39455e-31	5.7699e-30	down
TraesCS1B02G046300	2.78812	1.47929	1.03289e-68	1.14038e-66	up		TraesCS1A02G291200	0.33944	-1.55877	1.09552e-49	7.86617e-48	down
TraesCS1B02G050600	3.08004	1.62295	8.5128e-09	9.36347e-08	up		TraesCS1A02G297400	0.484545	-1.0453	0.0128168	0.0455525	down
TraesCS1B02G050900	3.59334	1.84533	9.0447e-06	6.73536e-05	up		TraesCS1A02G297500	0.342635	-1.54526	5.93506e-22	1.66883e-20	down
TraesCS1B02G051000	7.38619	2.88483	5.66673e-05	0.00036764	up		TraesCS1A02G304000	0.301481	-1.72986	5.57127e-06	4.28662e-05	down
TraesCS1B02G056600	3.60567	1.85027	0.00758297	0.0291886	up		TraesCS1A02G304200	0.45871	-1.12435	1.63781e-48	1.13883e-46	down
TraesCS1B02G062300	2.54853	1.34966	6.02295e-10	7.47043e-09	up		TraesCS1A02G304700	0.215937	-2.21132	0.00961279	0.0356907	down
TraesCS1B02G064600	20.8873	4.38455	0.0137794	0.0484455	up		TraesCS1A02G308500	0.368718	-1.43941	4.3397e-20	1.09978e-18	down
TraesCS1B02G066400	2.193	1.13291	1.04395e-05	7.67752e-05	up		TraesCS1A02G308700	0.34885	-1.51932	2.02412e-12	3.11827e-11	down
TraesCS1B02G077000	4.26371	2.09211	2.11064e-06	1.72729e-05	up		TraesCS1A02G311700	0.00814373	-6.94009	1.6104e-07	1.51515e-06	down
TraesCS1B02G085200	2.15081	1.10488	6.68509e-33	2.87805e-31	up		TraesCS1A02G312400	0.140774	-2.82855	5.06972e-51	3.73601e-49	down
TraesCS1B02G093800	2.30069	1.20207	2.66969e-05	0.000183972	up		TraesCS1A02G312900	0.0414453	-4.59265	1.08037e-29	4.22591e-28	down
TraesCS1B02G097800	2.12703	1.08884	6.09328e-20	1.52846e-18	up		TraesCS1A02G313300	0.354264	-1.4971	1.33605e-82	2.02735e-80	down
TraesCS1B02G101900	41.5576	5.37704	0.00013868	0.000834586	up		TraesCS1A02G315300	0.457167	-1.12921	3.14446e-05	0.00021382	down
TraesCS1B02G102100	2.21715	1.1487	0.00886204	0.0333088	up		TraesCS1A02G315500	0.47563	-1.07209	3.13236e-09	3.61919e-08	down
TraesCS1B02G109100	2.65597	1.40924	0.00969993	0.0359708	up		TraesCS1A02G321100	0.375095	-1.41467	0.00386601	0.0162676	down
TraesCS1B02G111200	8.48081	3.0842	2.19325e-39	1.18008e-37	up		TraesCS1A02G323400	0.168793	-2.56667	9.67394e-284	1.29561e-280	down
TraesCS1B02G125700	8.40161	3.07067	8.8675e-10	1.08264e-08	up		TraesCS1A02G324000	0.154158	-2.69752	0.000753254	0.00384567	down
TraesCS1B02G130000	4.07315	2.02614	8.82074e-07	7.57696e-06	up		TraesCS1A02G325800	0.399236	-1.32469	0.000344929	0.00190618	down
TraesCS1B02G133300	2.24107	1.16419	0.00491022	0.0200493	up		TraesCS1A02G331500	0.0302492	-5.04696	0.000514426	0.00272927	down
TraesCS1B02G135700	2.64886	1.40537	0.0133183	0.0470391	up		TraesCS1A02G331600	0.201879	-2.30844	0.00577553	0.0230928	down
TraesCS1B02G153000	2.07741	1.05479	0.00297217	0.0129633	up		TraesCS1A02G333200	0.362062	-1.46569	1.51232e-06	1.26178e-05	down
TraesCS1B02G155300	3.21792	1.68613	8.70766e-07	7.48773e-06	up		TraesCS1A02G334700	0.053137	-4.23414	0.00153963	0.00726725	down
TraesCS1B02G159400	2.6481	1.40496	2.39826e-07	2.21248e-06	up		TraesCS1A02G338400	0.019025	-5.71596	6.2934e-10	7.79019e-09	down
TraesCS1B02G164000	2.69432	1.42992	1.02552e-20	2.68962e-19	up		TraesCS1A02G338500	0.281092	-1.83089	2.15208e-06	1.75816e-05	down
TraesCS1B02G167800	2.19621	1.13502	1.35289e-23	4.06971e-22	up		TraesCS1A02G338600	0.255058	-1.9711	1.50944e-18	3.5171e-17	down
TraesCS1B02G168100	2.03471	1.02483	4.26951e-24	1.31713e-22	up		TraesCS1A02G339200	0.0957054	-3.38526	7.78547e-16	1.53337e-14	down
TraesCS1B02G169200	11.5633	3.53149	4.80825e-05	0.000316477	up		TraesCS1A02G339700	0.0750858	-3.73532	1.33181e-13	2.24484e-12	down
TraesCS1B02G173600	2.00208	1.0015	4.38004e-18	9.93159e-17	up		TraesCS1A02G342800	0.194601	-2.36141	3.19488e-23	9.41306e-22	down
TraesCS1B02G174600	2.26213	1.17768	1.12033e-30	4.51701e-29	up		TraesCS1A02G347200	0.226897	-2.13989	8.36234e-27	2.92051e-25	down
TraesCS1B02G195800	2.36632	1.24264	1.2363e-15	2.39662e-14	up		TraesCS1A02G348800	0.0298828	-5.06454	1.70527e-09	2.02265e-08	down
TraesCS1B02G197900	2.65474	1.40857	4.4744e-07	3.98921e-06	up		TraesCS1A02G350900	0.234908	-2.08983	3.7712e-15	7.06822e-14	down
TraesCS1B02G203200	8.00017	3.00003	1.10593e-08	1.19911e-07	up		TraesCS1A02G351300	0.140596	-2.83037	8.91931e-19	2.10533e-17	down
TraesCS1B02G203300	8.20806	3.03704	2.89808e-15	5.46502e-14	up		TraesCS1A02G352000	0.288102	-1.79535	1.14568e-72	1.39215e-70	down
TraesCS1B02G209200	34.3012	5.10019	0.00118881	0.00577779	up		TraesCS1A02G352500	0.470628	-1.08734	1.27733e-08	1.37574e-07	down
TraesCS1B02G211700	2.82538	1.49844	0.0133192	0.0470395	up		TraesCS1A02G355300	0.406264	-1.29951	1.35578e-09	1.62344e-08	down
TraesCS1B02G212200	2.80054	1.4857	1.14293e-19	2.82553e-18	up		TraesCS1A02G357900	0.373644	-1.42026	1.35898e-17	2.98263e-16	down
TraesCS1B02G213100	2.50161	1.32286	4.28558e-18	9.72814e-17	up		TraesCS1A02G360400	0.498079	-1.00555	1.35425e-08	1.45427e-07	down
TraesCS1B02G213600	2.52296	1.33512	0.000279698	0.00157393	up		TraesCS1A02G362400	0.017918	-5.80244	9.99297e-05	0.000620289	down
TraesCS1B02G213800	3.52838	1.81901	0.0111672	0.0405576	up		TraesCS1A02G364700	0.493319	-1.01941	6.6951e-07	5.83732e-06	down
TraesCS1B02G223300	5.19772	2.37788	1.30028e-213	9.42431e-211	up		TraesCS1A02G368900	0.0374851	-4.73754	0.00724566	0.0280939	down
TraesCS1B02G224300	5.55947	2.47495	1.40572e-33	6.19916e-32	up		TraesCS1A02G369600	0.00500614	-7.64209	8.80658e-53	6.79033e-51	down
TraesCS1B02G243700	2.91732	1.54464	0.000142059	0.000853252	up		TraesCS1A02G370400	0.0639866	-3.96609	2.96116e-05	0.000202294	down
TraesCS1B02G247700	5.25313	2.39318	1.49584e-09	1.78317e-08	up		TraesCS1A02G370600	0.127502	-2.97141	1.33027e-16	2.74369e-15	down
TraesCS1B02G248300	3.44157	1.78307	2.03915e-29	7.86636e-28	up		TraesCS1A02G370700	0.267882	-1.90033	2.37687e-20	6.10642e-19	down
TraesCS1B02G254500	3.26188	1.7057	2.16607e-52	1.65155e-50	up		TraesCS1A02G372400	0.249439	-2.00324	1.73638e-104	3.80687e-102	down
TraesCS1B02G258400	2.34572	1.23003	0.0142021	0.0496905	up		TraesCS1A02G379700	0.268465	-1.89719	3.42307e-09	3.93369e-08	down
TraesCS1B02G258800	2.07251	1.05138	1.08336e-20	2.83891e-19	up		TraesCS1A02G381400	0.0432125	-4.53241	5.42742e-44	3.33367e-42	down
TraesCS1B02G259700	2.76885	1.46929	7.65569e-16	1.50926e-14	up		TraesCS1A02G382900	0.208153	-2.26428	0.0022979	0.0103025	down
TraesCS1B02G267300	64.2426	6.00546	2.14198e-05	0.000149786	up		TraesCS1A02G384500	0.203542	-2.2966	0.000966438	0.00479905	down
TraesCS1B02G267600	2.61875	1.38888	1.0228e-06	8.71893e-06	up		TraesCS1A02G384600	0.461278	-1.11629	7.17006e-05	0.000457368	down
TraesCS1B02G267700	2.11197	1.07859	1.54658e-05	0.000110662	up		TraesCS1A02G384700	0.196159	-2.3499	0.0025935	0.0114593	down
TraesCS1B02G269500	3.76162	1.91135	9.00336e-34	4.00773e-32	up		TraesCS1A02G385900	0.439318	-1.18666	9.5274e-12	1.38793e-10	down
TraesCS1B02G269700	2.68128	1.42292	1.8687e-18	4.33126e-17	up		TraesCS1A02G393900	0.33678	-1.57012	9.61642e-05	0.00059915	down
TraesCS1B02G273300	10.7504	3.42632	0.0124349	0.044426	up		TraesCS1A02G395300	0.221206	-2.17654	2.40751e-07	2.22002e-06	down
TraesCS1B02G279100	2.68925	1.4272	0.000591704	0.00309239	up		TraesCS1A02G396900	0.227148	-2.1383	2.23707e-96	4.30685e-94	down
TraesCS1B02G279900	2.048	1.03422	0.00829676	0.0315245	up		TraesCS1A02G397200	0.399415	-1.32404	6.7291e-07	5.86447e-06	down
TraesCS1B02G291500	2.37688	1.24907	1.09274e-05	8.0067e-05	up		TraesCS1A02G398300	0.418497	-1.25671	3.00775e-11	4.19607e-10	down
TraesCS1B02G291700	2.35039	1.2329	0.00012667	0.000768768	up		TraesCS1A02G403300	0.0688735	-3.85991	0	0	down
TraesCS1B02G294700	2.7004	1.43317	0.00564366	0.0226404	up		TraesCS1A02G410500	0.423467	-1.23968	0.0111705	0.0405672	down
TraesCS1B02G295400	3.71803	1.89454	0.000448515	0.0024144	up		TraesCS1A02G410700	0.219421	-2.18823	1.98657e-06	1.63008e-05	down
TraesCS1B02G296700	6.08741	2.60583	1.20251e-07	1.1525e-06	up		TraesCS1A02G410800	0.437742	-1.19185	1.94267e-07	1.81336e-06	down
TraesCS1B02G298600	8.3651	3.06438	0.0141886	0.049649	up		TraesCS1A02G412900	0.490519	-1.02762	9.05406e-26	3.0151e-24	down
TraesCS1B02G298800	9.18824	3.19979	0.0010275	0.00507003	up		TraesCS1A02G413400	0.175848	-2.5076	2.44911e-18	5.64046e-17	down
TraesCS1B02G301600	2.7999	1.48537	1.11812e-05	8.17806e-05	up		TraesCS1A02G414400	0.0487719	-4.3578	3.7963e-05	0.000254437	down
TraesCS1B02G308900	6.13217	2.6164	8.40907e-61	8.01947e-59	up		TraesCS1A02G423100	0.225303	-2.15006	1.3122e-12	2.05388e-11	down
TraesCS1B02G309100	28.4468	4.8302	0.000762892	0.00388908	up		TraesCS1A02G427400	0.397651	-1.33043	1.59223e-05	0.000113691	down
TraesCS1B02G313400	3.54536	1.82593	5.04595e-19	1.20397e-17	up		TraesCS1A02G431400	0.287768	-1.79702	1.62382e-45	1.04533e-43	down
TraesCS1B02G314000	2.01838	1.0132	3.53641e-07	3.19454e-06	up		TraesCS1A02G431600	0.445583	-1.16623	9.39286e-11	1.25579e-09	down
TraesCS1B02G319800	80.7729	6.3358	4.46323e-06	3.48456e-05	up		TraesCS1B02G011100	0.38151	-1.39021	4.54092e-25	1.45477e-23	down
TraesCS1B02G321900	3.24686	1.69905	6.0476e-41	3.39321e-39	up		TraesCS1B02G011400	0.0819547	-3.60903	9.32828e-06	6.92645e-05	down
TraesCS1B02G324000	2.98324	1.57688	7.54562e-06	5.68153e-05	up		TraesCS1B02G019300	0.315494	-1.66432	3.17984e-14	5.60516e-13	down
TraesCS1B02G326800	22.3697	4.48347	8.62177e-266	1.084e-262	up		TraesCS1B02G031100	0.483269	-1.0491	4.14853e-14	7.25458e-13	down
TraesCS1B02G326900	25.8168	4.69024	6.85415e-155	2.89222e-152	up		TraesCS1B02G032700	0.499232	-1.00222	8.21262e-05	0.000517919	down
TraesCS1B02G328200	124.1	6.95536	2.15261e-08	2.25269e-07	up		TraesCS1B02G038700	0.194131	-2.3649	4.75918e-06	3.6992e-05	down
TraesCS1B02G333800	5.79937	2.5359	0.00465452	0.019132	up		TraesCS1B02G042200	0.417466	-1.26027	9.67863e-20	2.40432e-18	down
TraesCS1B02G335400	4.38187	2.13155	0.00822004	0.0312812	up		TraesCS1B02G042300	0.193798	-2.36737	0.000173666	0.00102158	down
TraesCS1B02G341600	4.48109	2.16385	2.09204e-11	2.9581e-10	up		TraesCS1B02G063700	0.0543032	-4.20282	0.00258678	0.0114321	down
TraesCS1B02G344900	2.78938	1.47995	3.31624e-16	6.68327e-15	up		TraesCS1B02G063800	0.45958	-1.12161	0.00758885	0.0292061	down
TraesCS1B02G346300	2.31709	1.21232	0.000150197	0.000897582	up		TraesCS1B02G073400	0.412937	-1.27601	2.88121e-05	0.000197291	down
TraesCS1B02G347400	5.6512	2.49856	1.96887e-18	4.56002e-17	up		TraesCS1B02G075200	0.29751	-1.74899	3.16542e-19	7.65054e-18	down
TraesCS1B02G347600	2.79586	1.48329	1.21676e-17	2.68293e-16	up		TraesCS1B02G083400	0.323572	-1.62784	6.98939e-53	5.41629e-51	down
TraesCS1B02G349100	5.98822	2.58213	0.00115383	0.00562329	up		TraesCS1B02G088400	0.487142	-1.03759	2.64005e-08	2.7363e-07	down
TraesCS1B02G349500	40.3319	5.33385	0.000599223	0.00312771	up		TraesCS1B02G088500	0.428666	-1.22207	4.63161e-06	3.60641e-05	down
TraesCS1B02G354600	2.54901	1.34994	0.000201588	0.00117085	up		TraesCS1B02G090500	0.167829	-2.57494	2.92572e-221	2.28158e-218	down
TraesCS1B02G356100	2.66063	1.41177	1.8714e-30	7.51084e-29	up		TraesCS1B02G090600	0.386419	-1.37176	5.62227e-41	3.15744e-39	down
TraesCS1B02G356200	2.74672	1.45771	2.93889e-13	4.82816e-12	up		TraesCS1B02G093700	0.493074	-1.02012	0.00697999	0.0272248	down
TraesCS1B02G364100	8.20127	3.03585	0.00290723	0.012699	up		TraesCS1B02G097200	0.151376	-2.72379	1.07127e-236	1.01535e-233	down
TraesCS1B02G364200	31.9312	4.9969	2.25037e-25	7.33319e-24	up		TraesCS1B02G097400	0.0811059	-3.62405	4.12167e-214	3.0229e-211	down
TraesCS1B02G370900	3.97598	1.99131	7.88972e-70	8.91857e-68	up		TraesCS1B02G098600	0.26328	-1.92533	3.60765e-07	3.25603e-06	down
TraesCS1B02G371900	6.4919	2.69864	3.03085e-20	7.73814e-19	up		TraesCS1B02G102700	0.342445	-1.54606	9.59662e-35	4.39568e-33	down
TraesCS1B02G372400	11.2559	3.49262	0.00366786	0.015541	up		TraesCS1B02G104600	0.443856	-1.17184	4.13186e-53	3.23445e-51	down
TraesCS1B02G373100	5.89672	2.55991	1.98544e-106	4.49696e-104	up		TraesCS1B02G109400	0.481929	-1.05311	0.006216	0.024593	down
TraesCS1B02G374700	4.05461	2.01956	0.000596416	0.00311411	up		TraesCS1B02G113500	0.0860766	-3.53823	5.0901e-10	6.34661e-09	down
TraesCS1B02G377500	7.3397	2.87572	2.15811e-07	2.00263e-06	up		TraesCS1B02G113700	0.168735	-2.56717	1.93828e-24	6.08622e-23	down
TraesCS1B02G379500	4.40887	2.14041	0.000411701	0.00223665	up		TraesCS1B02G115900	0.00685403	-7.18883	5.7699e-08	5.74723e-07	down
TraesCS1B02G395400	2.11527	1.08084	0.000248991	0.00141496	up		TraesCS1B02G117500	0.363135	-1.46142	2.87999e-112	7.24194e-110	down
TraesCS1B02G398700	2.09234	1.06512	0.000325357	0.00180709	up		TraesCS1B02G119600	0.38521	-1.37628	0.000113673	0.000698435	down
TraesCS1B02G410300	2.21662	1.14836	8.18145e-19	1.93562e-17	up		TraesCS1B02G119700	0.310555	-1.68708	0.00690238	0.0269634	down
TraesCS1B02G410800	2.42004	1.27503	4.91045e-13	7.94846e-12	up		TraesCS1B02G119800	0.450432	-1.15062	0.00746945	0.0288214	down
TraesCS1B02G411100	3.09533	1.63009	1.81052e-55	1.4992e-53	up		TraesCS1B02G121600	0.0807348	-3.63067	2.65174e-59	2.45293e-57	down
TraesCS1B02G411900	5.8422	2.54651	8.85529e-11	1.18649e-09	up		TraesCS1B02G122800	0.183164	-2.44879	7.16275e-151	2.82869e-148	down
TraesCS1B02G416400	3.9456	1.98025	0.000726845	0.00372628	up		TraesCS1B02G128000	0.411867	-1.27975	1.07266e-06	9.12631e-06	down
TraesCS1B02G419900	2.34606	1.23024	9.65969e-08	9.38207e-07	up		TraesCS1B02G128900	0.341301	-1.55088	0.000121782	0.000741806	down
TraesCS1B02G431400	3.84968	1.94474	8.66443e-69	9.60054e-67	up		TraesCS1B02G132700	0.348038	-1.52269	1.13759e-143	4.22189e-141	down
TraesCS1B02G434600	52.8936	5.72502	5.35623e-53	4.15593e-51	up		TraesCS1B02G133200	0.184793	-2.43602	0.000133591	0.000806326	down
TraesCS1B02G434700	55.2742	5.78853	5.30828e-05	0.000346391	up		TraesCS1B02G135100	0.242707	-2.04271	1.90859e-23	5.69406e-22	down
TraesCS1B02G434800	338.983	8.40507	1.18245e-11	1.71003e-10	up		TraesCS1B02G135400	0.37547	-1.41323	0.000167495	0.000988491	down
TraesCS1B02G434900	77.4334	6.27488	5.4393e-06	4.19136e-05	up		TraesCS1B02G138500	0.147543	-2.76079	9.27011e-05	0.000579389	down
TraesCS1B02G435100	306.024	8.2575	1.75245e-11	2.49741e-10	up		TraesCS1B02G138600	0.370653	-1.43186	0.00483962	0.0198122	down
TraesCS1B02G435200	163.927	7.35691	2.03144e-09	2.39066e-08	up		TraesCS1B02G139000	0.330086	-1.59909	2.02832e-22	5.7905e-21	down
TraesCS1B02G435300	18.4624	4.20651	2.30496e-25	7.50538e-24	up		TraesCS1B02G139200	0.264819	-1.91692	2.98618e-05	0.000203867	down
TraesCS1B02G435400	5.5545	2.47366	4.37764e-18	9.9298e-17	up		TraesCS1B02G144500	0.497331	-1.00772	1.32164e-09	1.58317e-08	down
TraesCS1B02G435500	19.1555	4.25969	0.00608287	0.0241352	up		TraesCS1B02G148100	0.497247	-1.00797	6.39016e-12	9.44979e-11	down
TraesCS1B02G439900	2.03466	1.02479	3.45652e-05	0.000233186	up		TraesCS1B02G151200	0.187592	-2.41433	0.00590964	0.0235395	down
TraesCS1B02G449200	2.23926	1.16302	2.4124e-11	3.39549e-10	up		TraesCS1B02G153100	0.0377994	-4.72549	0.00806233	0.0307761	down
TraesCS1B02G449700	2.71213	1.43943	0.00597781	0.0237735	up		TraesCS1B02G159800	0.264651	-1.91784	3.20137e-10	4.07746e-09	down
TraesCS1B02G454000	4.23478	2.08229	0.0045038	0.0185932	up		TraesCS1B02G159900	0.332167	-1.59002	2.87935e-08	2.96734e-07	down
TraesCS1B02G454400	2.24837	1.16888	0.000375337	0.0020587	up		TraesCS1B02G163300	0.0292089	-5.09745	0.00323135	0.013929	down
TraesCS1B02G460700	2.95315	1.56226	0.00105916	0.0052093	up		TraesCS1B02G165500	0.451616	-1.14683	6.22694e-10	7.71257e-09	down
TraesCS1B02G469500	2.92043	1.54618	2.33982e-27	8.32272e-26	up		TraesCS1B02G166600	0.157561	-2.66601	2.82364e-12	4.30158e-11	down
TraesCS1B02G472200	2.64821	1.40502	6.98681e-08	6.88368e-07	up		TraesCS1B02G167200	0.453394	-1.14116	0.0115989	0.0418687	down
TraesCS1B02G472800	4.63499	2.21257	5.10413e-10	6.36282e-09	up		TraesCS1B02G167900	0.149585	-2.74097	0.00713423	0.0277438	down
TraesCS1B02G476400	34.295	5.09993	0.00129065	0.00622636	up		TraesCS1B02G170100	0.024667	-5.34127	0.000756882	0.00386195	down
TraesCS1B02G476700	2.17324	1.11985	0.00092757	0.00462748	up		TraesCS1B02G170200	0.0757997	-3.72166	8.52322e-09	9.37326e-08	down
TraesCS1B02G480300	3.60806	1.85123	1.81178e-08	1.91455e-07	up		TraesCS1B02G173200	0.313743	-1.67234	2.99645e-20	7.65985e-19	down
TraesCS1D02G001700	2.44916	1.29229	6.68251e-09	7.4272e-08	up		TraesCS1B02G174100	0.0455865	-4.45525	4.17542e-49	2.94319e-47	down
TraesCS1D02G002200	3.80828	1.92914	6.49359e-12	9.59353e-11	up		TraesCS1B02G175900	0.19882	-2.33046	0.000407347	0.00221613	down
TraesCS1D02G005100	2.30969	1.2077	1.31548e-18	3.07331e-17	up		TraesCS1B02G178500	0.393498	-1.34557	0.00468791	0.0192564	down
TraesCS1D02G005300	3.10856	1.63625	4.72227e-14	8.2345e-13	up		TraesCS1B02G180300	0.253265	-1.98128	0.000446758	0.00240737	down
TraesCS1D02G009100	6.20487	2.6334	1.35273e-23	4.06971e-22	up		TraesCS1B02G180400	0.487868	-1.03544	0.00082272	0.00415658	down
TraesCS1D02G009300	2.24065	1.16391	3.23582e-07	2.93895e-06	up		TraesCS1B02G181500	0.153776	-2.7011	5.93177e-15	1.09577e-13	down
TraesCS1D02G013700	4.29981	2.10427	0.000324022	0.00180049	up		TraesCS1B02G181800	0.231794	-2.10909	4.21674e-69	4.70618e-67	down
TraesCS1D02G016100	6.05106	2.59719	3.35149e-21	9.06788e-20	up		TraesCS1B02G182400	0.391313	-1.35361	1.8324e-100	3.7257e-98	down
TraesCS1D02G016500	2.10033	1.07061	8.51125e-12	1.24697e-10	up		TraesCS1B02G185800	0.388007	-1.36585	0.00216936	0.00979889	down
TraesCS1D02G018700	6.07163	2.60209	1.9013e-47	1.28718e-45	up		TraesCS1B02G186100	0.420584	-1.24953	3.13014e-06	2.5031e-05	down
TraesCS1D02G021600	11.8453	3.56625	1.81476e-11	2.58025e-10	up		TraesCS1B02G186300	0.434951	-1.20107	5.08912e-53	3.96366e-51	down
TraesCS1D02G022900	2.75147	1.46021	5.52691e-14	9.59685e-13	up		TraesCS1B02G186600	0.351415	-1.50875	1.08671e-10	1.44674e-09	down
TraesCS1D02G037700	2.06555	1.04653	3.48189e-28	1.27381e-26	up		TraesCS1B02G186700	0.0875766	-3.51331	4.97424e-11	6.82056e-10	down
TraesCS1D02G043000	11.2876	3.49666	2.26069e-11	3.19071e-10	up		TraesCS1B02G186900	0.243372	-2.03877	0.0032317	0.0139296	down
TraesCS1D02G043200	3.35746	1.74737	0.0136865	0.0481687	up		TraesCS1B02G187500	0.327828	-1.60899	3.62897e-08	3.69293e-07	down
TraesCS1D02G047300	2.18592	1.12824	2.79802e-15	5.28603e-14	up		TraesCS1B02G189400	0.466131	-1.10119	1.0168e-07	9.84626e-07	down
TraesCS1D02G050300	3.03369	1.60107	0.000172225	0.00101359	up		TraesCS1B02G191200	0.296377	-1.75449	2.90369e-86	4.75765e-84	down
TraesCS1D02G059800	13.2614	3.72916	0.00533585	0.0215334	up		TraesCS1B02G191600	0.378884	-1.40017	7.16721e-39	3.77716e-37	down
TraesCS1D02G060600	2.54428	1.34725	2.69175e-24	8.39225e-23	up		TraesCS1B02G193800	0.272937	-1.87336	0.00983746	0.036402	down
TraesCS1D02G071800	5.70176	2.51141	0.000205741	0.00119295	up		TraesCS1B02G194300	0.406775	-1.2977	2.12393e-13	3.52884e-12	down
TraesCS1D02G073000	2.59367	1.375	0.0139483	0.0489329	up		TraesCS1B02G194400	0.256677	-1.96197	0.000158377	0.000940081	down
TraesCS1D02G077800	3.46992	1.7949	1.26406e-06	1.06608e-05	up		TraesCS1B02G194600	0.103632	-3.27046	1.12631e-09	1.36163e-08	down
TraesCS1D02G081500	2.84982	1.51087	3.84312e-12	5.78318e-11	up		TraesCS1B02G194900	0.16373	-2.61061	5.31623e-205	3.52169e-202	down
TraesCS1D02G086000	7.13072	2.83405	2.75813e-06	2.22099e-05	up		TraesCS1B02G200600	0.0681501	-3.87514	1.52929e-131	4.80688e-129	down
TraesCS1D02G090800	2.95061	1.56101	1.18532e-22	3.41872e-21	up		TraesCS1B02G201100	0.0243171	-5.36188	0	0	down
TraesCS1D02G092400	11.8841	3.57096	1.72014e-06	1.42494e-05	up		TraesCS1B02G202400	0.338513	-1.56272	2.36008e-06	1.91944e-05	down
TraesCS1D02G092600	3.70794	1.89062	0.00121168	0.00588198	up		TraesCS1B02G207100	0.33279	-1.58731	4.28537e-40	2.34884e-38	down
TraesCS1D02G097800	2.15787	1.10961	0.00466599	0.0191753	up		TraesCS1B02G209700	0.431477	-1.21264	2.50356e-25	8.11774e-24	down
TraesCS1D02G106800	3.38085	1.75739	0.00041856	0.00227052	up		TraesCS1B02G211100	0.47394	-1.07722	2.43525e-31	9.95543e-30	down
TraesCS1D02G107000	2.23399	1.15962	2.30121e-78	3.12959e-76	up		TraesCS1B02G213400	0.465391	-1.10349	5.56771e-44	3.41643e-42	down
TraesCS1D02G114300	2.07995	1.05655	2.84202e-05	0.000194803	up		TraesCS1B02G215800	0.413907	-1.27262	7.02161e-49	4.92128e-47	down
TraesCS1D02G118800	6.5166	2.70412	8.15091e-13	1.29621e-11	up		TraesCS1B02G220600	0.299997	-1.73698	1.54192e-14	2.77109e-13	down
TraesCS1D02G126600	2.16406	1.11374	1.70707e-08	1.8098e-07	up		TraesCS1B02G221100	0.0158006	-5.98388	8.19025e-08	8.01434e-07	down
TraesCS1D02G130300	2.10504	1.07385	0.00811671	0.0309473	up		TraesCS1B02G221600	0.392946	-1.3476	0.0122498	0.0438438	down
TraesCS1D02G138800	4.07151	2.02556	0.0101738	0.0374532	up		TraesCS1B02G225000	0.218459	-2.19457	4.7872e-25	1.53287e-23	down
TraesCS1D02G139700	2.71801	1.44255	0.00141795	0.00676911	up		TraesCS1B02G225400	0.441335	-1.18005	0.00112944	0.00551647	down
TraesCS1D02G141400	2.26644	1.18043	2.41313e-06	1.96025e-05	up		TraesCS1B02G227700	0.413972	-1.27239	7.51353e-05	0.000477104	down
TraesCS1D02G147000	2.01778	1.01277	9.71799e-36	4.61245e-34	up		TraesCS1B02G229700	0.45788	-1.12696	6.04638e-30	2.38019e-28	down
TraesCS1D02G147400	3.29541	1.72046	4.31569e-52	3.2663e-50	up		TraesCS1B02G234300	0.438671	-1.18879	0.000208277	0.00120618	down
TraesCS1D02G155900	2.40735	1.26745	4.7528e-26	1.60266e-24	up		TraesCS1B02G234700	0.408603	-1.29123	7.3944e-05	0.000470363	down
TraesCS1D02G156600	3.55398	1.82944	1.08598e-06	9.23072e-06	up		TraesCS1B02G241500	0.0503924	-4.31065	0.00603937	0.0239842	down
TraesCS1D02G163800	6.78444	2.76223	0.000178491	0.00104787	up		TraesCS1B02G242700	0.0887451	-3.49419	6.41746e-15	1.18336e-13	down
TraesCS1D02G175400	2.46641	1.30241	9.30649e-05	0.000581486	up		TraesCS1B02G243300	0.0025008	-8.6434	1.81129e-12	2.80443e-11	down
TraesCS1D02G186500	4.25605	2.08952	0.000624675	0.0032501	up		TraesCS1B02G244900	0.0586196	-4.09247	0.000238144	0.00135909	down
TraesCS1D02G187400	2.75014	1.45951	1.60503e-05	0.000114552	up		TraesCS1B02G245400	0.43418	-1.20364	7.44516e-06	5.61275e-05	down
TraesCS1D02G188500	2.57625	1.36528	2.99882e-23	8.85234e-22	up		TraesCS1B02G245500	0.00585061	-7.4172	9.51399e-09	1.03924e-07	down
TraesCS1D02G201800	2.3245	1.21692	2.12381e-08	2.22558e-07	up		TraesCS1B02G248600	0.347423	-1.52523	6.33911e-12	9.37881e-11	down
TraesCS1D02G202500	6.8028	2.76613	1.58745e-06	1.32106e-05	up		TraesCS1B02G249000	0.141967	-2.81637	1.97824e-21	5.42625e-20	down
TraesCS1D02G209400	2.70979	1.43818	0.00190667	0.00875751	up		TraesCS1B02G250600	0.113797	-3.13547	0	0	down
TraesCS1D02G210900	2.58074	1.36778	0.00607005	0.0240968	up		TraesCS1B02G250900	0.289142	-1.79015	7.25764e-89	1.23174e-86	down
TraesCS1D02G211200	2.13712	1.09567	8.02884e-22	2.23917e-20	up		TraesCS1B02G251700	0.130585	-2.93694	1.64577e-10	2.15634e-09	down
TraesCS1D02G212400	2.62569	1.3927	3.05287e-58	2.73768e-56	up		TraesCS1B02G251800	0.461455	-1.11574	6.71283e-11	9.09516e-10	down
TraesCS1D02G213700	6.39668	2.67732	4.10497e-42	2.41312e-40	up		TraesCS1B02G251900	0.0567136	-4.14016	8.79207e-16	1.72666e-14	down
TraesCS1D02G229400	4.84526	2.27657	0.00298634	0.0130177	up		TraesCS1B02G258200	0.470119	-1.0889	0.0073115	0.0283174	down
TraesCS1D02G236800	3.96583	1.98762	5.71221e-46	3.70824e-44	up		TraesCS1B02G260500	0.172038	-2.5392	6.71101e-15	1.23638e-13	down
TraesCS1D02G236900	11.2441	3.4911	0.00168783	0.00786972	up		TraesCS1B02G265500	0.0427908	-4.54656	0.00290275	0.0126812	down
TraesCS1D02G239700	3.57846	1.83934	1.69864e-12	2.63398e-11	up		TraesCS1B02G266100	0.465652	-1.10267	1.90718e-19	4.66254e-18	down
TraesCS1D02G243000	4.11441	2.04069	1.94631e-38	1.00761e-36	up		TraesCS1B02G268000	0.0324506	-4.94561	2.44118e-19	5.93973e-18	down
TraesCS1D02G247700	4.5609	2.18932	3.84505e-63	3.83925e-61	up		TraesCS1B02G268300	0.489173	-1.03158	0.000304415	0.00170105	down
TraesCS1D02G253600	2.39407	1.25947	0.000316321	0.00176171	up		TraesCS1B02G268600	0.385783	-1.37414	1.35314e-47	9.21136e-46	down
TraesCS1D02G256100	70.5571	6.14072	1.97502e-06	1.62104e-05	up		TraesCS1B02G272000	0.0114286	-6.45121	3.04756e-06	2.44118e-05	down
TraesCS1D02G271200	2.10819	1.076	0.00989798	0.0365995	up		TraesCS1B02G273700	0.124018	-3.01138	0.000380205	0.00208355	down
TraesCS1D02G271500	4.5195	2.17616	6.27969e-46	4.06807e-44	up		TraesCS1B02G279200	0.212126	-2.23701	4.30005e-53	3.36185e-51	down
TraesCS1D02G272200	23.5687	4.5588	0.000172176	0.0010134	up		TraesCS1B02G281200	0.48062	-1.05703	3.95288e-13	6.43905e-12	down
TraesCS1D02G276400	2.14978	1.10419	0.00660399	0.025934	up		TraesCS1B02G283100	0.00528011	-7.56522	3.18679e-09	3.68002e-08	down
TraesCS1D02G276600	2.29044	1.19563	1.99141e-11	2.82099e-10	up		TraesCS1B02G287400	0.195025	-2.35827	4.15331e-16	8.32648e-15	down
TraesCS1D02G278200	2.4779	1.30912	1.30136e-06	1.09569e-05	up		TraesCS1B02G288300	0.440356	-1.18326	0.00845936	0.0320407	down
TraesCS1D02G279000	2.11889	1.08331	6.37735e-06	4.85769e-05	up		TraesCS1B02G288600	0.398618	-1.32692	9.4801e-16	1.85763e-14	down
TraesCS1D02G281800	2.48924	1.3157	3.6584e-35	1.68953e-33	up		TraesCS1B02G293400	0.284927	-1.81134	0.00246044	0.0109381	down
TraesCS1D02G282000	3.39711	1.76431	0.000373556	0.00205021	up		TraesCS1B02G294300	0.339369	-1.55907	1.15715e-06	9.79507e-06	down
TraesCS1D02G286200	2.80845	1.48977	3.08822e-06	2.47246e-05	up		TraesCS1B02G296600	0.0729527	-3.7769	5.17767e-72	6.16984e-70	down
TraesCS1D02G288100	2.81203	1.49161	0.000371139	0.00203786	up		TraesCS1B02G304700	0.457418	-1.12842	1.78117e-05	0.000126144	down
TraesCS1D02G288500	2.11531	1.08087	4.5764e-08	4.61816e-07	up		TraesCS1B02G305800	0.0328163	-4.92944	0.00494149	0.0201543	down
TraesCS1D02G292000	2.05523	1.0393	2.27129e-23	6.74349e-22	up		TraesCS1B02G306500	0.295054	-1.76095	2.15948e-21	5.91022e-20	down
TraesCS1D02G292100	4.04162	2.01494	1.09646e-23	3.31125e-22	up		TraesCS1B02G315700	0.0284555	-5.13515	0.00194094	0.00889498	down
TraesCS1D02G297900	62.5127	5.96608	2.87809e-05	0.000197121	up		TraesCS1B02G319200	0.286034	-1.80574	3.60588e-13	5.88783e-12	down
TraesCS1D02G300700	2.99873	1.58435	0.000108245	0.000667201	up		TraesCS1B02G322800	0.402627	-1.31248	0.00634264	0.0250369	down
TraesCS1D02G302500	6.03456	2.59325	4.32743e-53	3.37896e-51	up		TraesCS1B02G323000	0.224123	-2.15764	0.0114911	0.0415478	down
TraesCS1D02G305000	2.29824	1.20053	2.38772e-17	5.16322e-16	up		TraesCS1B02G323100	0.233887	-2.09612	5.70173e-22	1.60396e-20	down
TraesCS1D02G311600	16.1129	4.01015	0.0103495	0.0379954	up		TraesCS1B02G323400	0.00462261	-7.75708	8.71897e-10	1.06472e-08	down
TraesCS1D02G312500	8.67281	3.1165	1.94485e-23	5.79664e-22	up		TraesCS1B02G324700	0.0295754	-5.07946	0.00224576	0.0100959	down
TraesCS1D02G315000	7.79321	2.96222	0.00497109	0.0202616	up		TraesCS1B02G325100	0.346805	-1.5278	3.9863e-87	6.61952e-85	down
TraesCS1D02G315100	52.196	5.70587	8.31672e-05	0.000523626	up		TraesCS1B02G327400	0.398539	-1.32721	5.44155e-10	6.77248e-09	down
TraesCS1D02G315200	13.0753	3.70877	1.0372e-05	7.63059e-05	up		TraesCS1B02G332500	0.194695	-2.36071	0.000117613	0.000719973	down
TraesCS1D02G320800	2.54228	1.34612	1.9188e-15	3.66433e-14	up		TraesCS1B02G336300	0.308602	-1.69618	2.30553e-193	1.39252e-190	down
TraesCS1D02G327000	2.84217	1.50699	4.88871e-65	5.06182e-63	up		TraesCS1B02G337400	0.119805	-3.06124	5.57957e-09	6.25779e-08	down
TraesCS1D02G333500	2.02444	1.01752	2.86224e-22	8.13724e-21	up		TraesCS1B02G337600	0.385272	-1.37605	0.000666222	0.00344444	down
TraesCS1D02G335400	3.11157	1.63764	0.000429669	0.00232545	up		TraesCS1B02G339100	0.338046	-1.56471	5.78965e-18	1.30319e-16	down
TraesCS1D02G336300	3.94933	1.98161	2.67988e-11	3.7531e-10	up		TraesCS1B02G345900	0.494037	-1.01731	0.000230581	0.00131935	down
TraesCS1D02G338200	29.8226	4.89833	0.00254194	0.0112477	up		TraesCS1B02G347900	0.240293	-2.05713	6.55937e-31	2.66383e-29	down
TraesCS1D02G338500	2.61278	1.38559	4.52972e-06	3.53333e-05	up		TraesCS1B02G350800	0.0138791	-6.17095	1.55172e-05	0.000111004	down
TraesCS1D02G345100	2.48318	1.31219	1.20919e-13	2.04487e-12	up		TraesCS1B02G351500	0.0995953	-3.32778	3.48097e-13	5.69292e-12	down
TraesCS1D02G345200	2.51153	1.32857	6.20393e-19	1.4757e-17	up		TraesCS1B02G352000	0.172237	-2.53754	1.71705e-23	5.13258e-22	down
TraesCS1D02G348400	8.65771	3.11398	0.00351048	0.014942	up		TraesCS1B02G352100	0.194562	-2.3617	9.03815e-11	1.20994e-09	down
TraesCS1D02G352600	16.184	4.01649	4.9694e-26	1.67204e-24	up		TraesCS1B02G355900	0.0457215	-4.45098	1.53873e-140	5.38615e-138	down
TraesCS1D02G356700	3.47945	1.79886	0.00685104	0.0267948	up		TraesCS1B02G361500	0.283794	-1.81709	2.00574e-76	2.6291e-74	down
TraesCS1D02G358400	10.274	3.36092	9.49852e-29	3.55946e-27	up		TraesCS1B02G362200	0.323056	-1.63014	3.38616e-72	4.0665e-70	down
TraesCS1D02G359100	7.986	2.99747	3.6892e-16	7.40569e-15	up		TraesCS1B02G363100	0.467706	-1.09632	4.00509e-13	6.52065e-12	down
TraesCS1D02G359400	4.21613	2.07592	0.00294862	0.0128697	up		TraesCS1B02G365100	0.100046	-3.32126	1.47972e-72	1.7945e-70	down
TraesCS1D02G360600	29.0905	4.86248	0.00084696	0.0042668	up		TraesCS1B02G369400	0.477905	-1.06521	1.74091e-10	2.27567e-09	down
TraesCS1D02G361000	3.22141	1.68769	6.92503e-28	2.50959e-26	up		TraesCS1B02G371100	0.223909	-2.15901	3.01423e-103	6.49293e-101	down
TraesCS1D02G364000	38.3387	5.26073	0.000118274	0.0007233	up		TraesCS1B02G371600	0.320386	-1.64212	1.39007e-08	1.49117e-07	down
TraesCS1D02G371200	2.35214	1.23397	5.96285e-14	1.03218e-12	up		TraesCS1B02G376300	0.162612	-2.6205	0.0069765	0.0272147	down
TraesCS1D02G371800	3.00548	1.5876	2.07503e-12	3.19113e-11	up		TraesCS1B02G376900	0.271117	-1.88301	6.68861e-11	9.06434e-10	down
TraesCS1D02G376400	2.08934	1.06304	0.00406048	0.0169826	up		TraesCS1B02G382600	0.402756	-1.31202	1.37884e-11	1.98519e-10	down
TraesCS1D02G386100	30.0258	4.90813	0.00342511	0.0146292	up		TraesCS1B02G385100	0.27256	-1.87535	0.00262853	0.0115925	down
TraesCS1D02G390500	2.10137	1.07133	2.9977e-09	3.47011e-08	up		TraesCS1B02G385200	0.41813	-1.25798	4.18811e-09	4.77102e-08	down
TraesCS1D02G392300	2.76153	1.46547	6.68837e-10	8.25753e-09	up		TraesCS1B02G387600	0.353869	-1.49871	0.00874611	0.0329373	down
TraesCS1D02G392500	2.09157	1.06459	1.804e-06	1.49021e-05	up		TraesCS1B02G388200	0.0430169	-4.53895	0.000274576	0.00154779	down
TraesCS1D02G398300	3.82463	1.93532	0.000107471	0.000662961	up		TraesCS1B02G388700	0.00892288	-6.80828	7.36168e-96	1.40412e-93	down
TraesCS1D02G402000	2.07582	1.05368	5.44509e-15	1.00859e-13	up		TraesCS1B02G389100	0.234857	-2.09015	0.00851068	0.0321884	down
TraesCS1D02G409500	7.18633	2.84526	0.00431542	0.0178982	up		TraesCS1B02G389700	0.286838	-1.80169	2.85646e-09	3.31409e-08	down
TraesCS1D02G410100	2.7583	1.46378	1.16546e-15	2.26287e-14	up		TraesCS1B02G389900	0.231262	-2.1124	9.20056e-13	1.45899e-11	down
TraesCS1D02G412000	2.63497	1.39779	2.89593e-13	4.76012e-12	up		TraesCS1B02G391400	0.370466	-1.43259	3.5444e-06	2.80704e-05	down
TraesCS1D02G412800	32.1527	5.00687	2.97898e-07	2.71569e-06	up		TraesCS1B02G391900	0.111914	-3.15953	2.1877e-06	1.78537e-05	down
TraesCS1D02G412900	38.7638	5.27664	0.000573921	0.00300915	up		TraesCS1B02G392400	0.147361	-2.76257	1.12025e-90	1.96625e-88	down
TraesCS1D02G413000	226.791	7.82522	3.41609e-10	4.33214e-09	up		TraesCS1B02G393900	0.292391	-1.77403	1.01479e-07	9.82992e-07	down
TraesCS1D02G413100	6.40904	2.68011	0.000123822	0.000752965	up		TraesCS1B02G403900	0.17722	-2.49639	9.31107e-09	1.01942e-07	down
TraesCS1D02G413200	18.3399	4.19691	3.73967e-05	0.000250915	up		TraesCS1B02G410400	0.307468	-1.70149	7.37943e-07	6.40767e-06	down
TraesCS1D02G413300	4.69275	2.23043	2.15757e-11	3.04935e-10	up		TraesCS1B02G411000	0.458523	-1.12493	0.00245225	0.0109049	down
TraesCS1D02G413400	3.06345	1.61516	0.00106175	0.00522036	up		TraesCS1B02G415100	0.444548	-1.16959	5.37746e-08	5.3772e-07	down
TraesCS1D02G414700	2.23088	1.15762	2.18545e-12	3.35257e-11	up		TraesCS1B02G422200	0.305872	-1.709	0.00359489	0.0152664	down
TraesCS1D02G417300	2.98211	1.57633	1.64699e-10	2.15748e-09	up		TraesCS1B02G423600	0.422439	-1.24318	0.0001144	0.000702466	down
TraesCS1D02G427400	2.27806	1.18781	3.09892e-05	0.000210909	up		TraesCS1B02G429400	0.439988	-1.18446	9.44948e-05	0.000589762	down
TraesCS1D02G428500	2.69122	1.42826	0.000448752	0.00241536	up		TraesCS1B02G432700	0.104038	-3.26481	2.07687e-236	1.9097e-233	down
TraesCS1D02G428600	5.3618	2.42272	0.000113848	0.000699356	up		TraesCS1B02G433300	0.0220027	-5.50618	0.000410862	0.00223269	down
TraesCS1D02G429900	3.13659	1.6492	0.000477341	0.00255385	up		TraesCS1B02G435700	0.0755199	-3.727	0.000201853	0.00117228	down
TraesCS1D02G441600	3.04703	1.60741	4.75478e-08	4.78562e-07	up		TraesCS1B02G437100	0.127975	-2.96607	1.70326e-24	5.36192e-23	down
TraesCS1D02G444500	2.15671	1.10883	0.00336005	0.0144002	up		TraesCS1B02G440200	0.372185	-1.42591	1.95705e-37	9.85031e-36	down
TraesCS1D02G449700	2.35297	1.23448	0.0019086	0.00876506	up		TraesCS1B02G449000	0.206245	-2.27757	9.58512e-06	7.09663e-05	down
TraesCS1D02G450100	4.12199	2.04334	0.00567704	0.0227536	up		TraesCS1B02G455100	0.4408	-1.1818	0.000121262	0.000739002	down
TraesCS1D02G453900	2.66299	1.41305	1.46735e-08	1.56752e-07	up		TraesCS1B02G455800	0.0162934	-5.93957	3.89135e-20	9.87375e-19	down
TraesCS2A02G000400	22.4101	4.48607	0.0123695	0.0442152	up		TraesCS1B02G459600	0.278283	-1.84537	0.00954851	0.0355012	down
TraesCS2A02G002700	3.19735	1.67688	1.1436e-69	1.288e-67	up		TraesCS1B02G466200	0.211734	-2.23968	8.90777e-32	3.71551e-30	down
TraesCS2A02G002900	13.0118	3.70175	0.00489036	0.0199841	up		TraesCS1B02G479000	0.0264939	-5.23819	0.00170398	0.00793296	down
TraesCS2A02G008500	19.9366	4.31735	0.00393212	0.0165097	up		TraesCS1D02G000800	0.324912	-1.62188	1.91366e-31	7.85444e-30	down
TraesCS2A02G008900	4.50121	2.17031	0.00289047	0.0126338	up		TraesCS1D02G009400	0.0313254	-4.99652	0.00324641	0.0139754	down
TraesCS2A02G012000	2.80687	1.48896	0.00452789	0.0186764	up		TraesCS1D02G020800	0.0136332	-6.19674	1.78092e-15	3.40843e-14	down
TraesCS2A02G016700	2.4476	1.29137	0.00245404	0.010912	up		TraesCS1D02G026000	0.427906	-1.22464	5.60573e-08	5.59185e-07	down
TraesCS2A02G021700	15.3076	3.93617	0.0141189	0.0494444	up		TraesCS1D02G029400	0.440898	-1.18148	0.00579125	0.0231451	down
TraesCS2A02G022200	2.58123	1.36806	0.00907935	0.0339928	up		TraesCS1D02G030000	0.330075	-1.59913	0.000324067	0.00180058	down
TraesCS2A02G027500	4.02058	2.0074	7.25178e-07	6.2995e-06	up		TraesCS1D02G030300	0.414863	-1.26929	2.58234e-08	2.68054e-07	down
TraesCS2A02G027800	3.22833	1.69079	1.35211e-07	1.28509e-06	up		TraesCS1D02G030500	0.197467	-2.34031	6.9247e-93	1.27346e-90	down
TraesCS2A02G031400	4.14349	2.05084	1.59685e-35	7.48113e-34	up		TraesCS1D02G034700	0.351795	-1.50719	1.97142e-10	2.56339e-09	down
TraesCS2A02G033100	4.06512	2.0233	8.85439e-09	9.71492e-08	up		TraesCS1D02G042100	0.289323	-1.78925	6.51943e-05	0.000418814	down
TraesCS2A02G035700	2.69975	1.43282	0.0078427	0.0300607	up		TraesCS1D02G045200	0.354812	-1.49487	1.92037e-08	2.0234e-07	down
TraesCS2A02G036400	3.4243	1.77581	1.93851e-11	2.74857e-10	up		TraesCS1D02G045600	0.275216	-1.86136	0.00016975	0.00100042	down
TraesCS2A02G045400	12.5531	3.64997	4.52697e-07	4.03432e-06	up		TraesCS1D02G053800	0.246207	-2.02206	0.00074821	0.00382309	down
TraesCS2A02G046100	2.64746	1.40461	1.01495e-33	4.50492e-32	up		TraesCS1D02G055200	0.197229	-2.34205	1.56458e-11	2.23952e-10	down
TraesCS2A02G046500	2.26588	1.18007	0.00240454	0.010719	up		TraesCS1D02G058300	0.455479	-1.13454	9.93735e-15	1.80806e-13	down
TraesCS2A02G047300	22.3809	4.4842	0.0136867	0.0481687	up		TraesCS1D02G066000	0.312873	-1.67635	1.96943e-48	1.3648e-46	down
TraesCS2A02G048600	2.21112	1.14478	9.81718e-35	4.49003e-33	up		TraesCS1D02G072600	0.351754	-1.50736	2.73932e-10	3.51659e-09	down
TraesCS2A02G053000	2.87161	1.52186	0.00253591	0.0112258	up		TraesCS1D02G072700	0.351613	-1.50794	0.00871454	0.0328385	down
TraesCS2A02G053100	2.64009	1.40059	4.40547e-07	3.93288e-06	up		TraesCS1D02G073100	0.401206	-1.31759	2.68291e-16	5.44241e-15	down
TraesCS2A02G056100	2.89713	1.53462	0.0138978	0.0487975	up		TraesCS1D02G073700	0.042249	-4.56494	0.0126096	0.0449637	down
TraesCS2A02G057100	2.53465	1.34179	3.60992e-24	1.11701e-22	up		TraesCS1D02G074300	0.436204	-1.19693	1.88385e-25	6.17659e-24	down
TraesCS2A02G062300	2.82453	1.49801	0.0111648	0.0405527	up		TraesCS1D02G074500	0.223701	-2.16035	6.59983e-173	3.30566e-170	down
TraesCS2A02G064900	2.56845	1.3609	9.86938e-84	1.53541e-81	up		TraesCS1D02G074600	0.350066	-1.5143	3.20715e-17	6.88442e-16	down
TraesCS2A02G076500	51.5314	5.68738	3.43452e-10	4.35461e-09	up		TraesCS1D02G075700	0.00540403	-7.53175	3.71482e-09	4.25231e-08	down
TraesCS2A02G078100	31.8335	4.99247	2.16157e-07	2.00524e-06	up		TraesCS1D02G081200	0.168606	-2.56827	0	0	down
TraesCS2A02G084700	2.30689	1.20595	0.000118089	0.00072231	up		TraesCS1D02G082900	0.484896	-1.04425	6.59401e-11	8.94204e-10	down
TraesCS2A02G086700	2.80352	1.48724	0.00534039	0.0215459	up		TraesCS1D02G086700	0.372562	-1.42445	4.23246e-46	2.7651e-44	down
TraesCS2A02G090600	2.54413	1.34717	1.30097e-22	3.74877e-21	up		TraesCS1D02G087700	0.376518	-1.40921	9.92926e-06	7.33028e-05	down
TraesCS2A02G096400	2.76029	1.46482	0.0021311	0.00964168	up		TraesCS1D02G087800	0.459047	-1.12329	8.5933e-31	3.4738e-29	down
TraesCS2A02G098800	2.04763	1.03395	0.00634479	0.0250422	up		TraesCS1D02G094700	0.21447	-2.22115	1.73992e-117	4.58083e-115	down
TraesCS2A02G100800	2.32154	1.21508	0.000222466	0.00127838	up		TraesCS1D02G094800	0.109851	-3.18638	0.000197015	0.00114624	down
TraesCS2A02G101000	5.58736	2.48217	9.51482e-07	8.15271e-06	up		TraesCS1D02G094900	0.147442	-2.76178	4.73637e-78	6.38497e-76	down
TraesCS2A02G101100	4.30102	2.10468	1.2131e-12	1.90312e-11	up		TraesCS1D02G095400	0.425075	-1.23421	1.04515e-14	1.89825e-13	down
TraesCS2A02G101400	5.23321	2.3877	9.00977e-153	3.67593e-150	up		TraesCS1D02G100300	0.0502317	-4.31526	3.30507e-05	0.000223827	down
TraesCS2A02G101900	10.0156	3.32417	2.38429e-106	5.38055e-104	up		TraesCS1D02G100900	0.218152	-2.19659	0.000192835	0.00112362	down
TraesCS2A02G102000	9.58004	3.26003	2.21633e-245	2.39546e-242	up		TraesCS1D02G101100	0.330239	-1.59842	1.76399e-06	1.45891e-05	down
TraesCS2A02G103900	2.37172	1.24593	4.25121e-05	0.000282498	up		TraesCS1D02G103500	0.0912638	-3.45381	9.93372e-296	1.61049e-292	down
TraesCS2A02G104100	2.63436	1.39745	1.3177e-07	1.25452e-06	up		TraesCS1D02G108100	0.127039	-2.97666	1.8359e-05	0.000129826	down
TraesCS2A02G106900	2.94492	1.55823	6.90136e-17	1.45159e-15	up		TraesCS1D02G111400	0.346561	-1.52882	2.23768e-05	0.000156123	down
TraesCS2A02G107400	6.51794	2.70442	0.0125226	0.0447028	up		TraesCS1D02G112400	0.289482	-1.78846	0.00817648	0.0311405	down
TraesCS2A02G107600	7.76259	2.95654	0.000683468	0.00352561	up		TraesCS1D02G113900	0.0864759	-3.53156	1.86185e-05	0.00013151	down
TraesCS2A02G110800	2.08373	1.05917	9.5074e-10	1.15664e-08	up		TraesCS1D02G114100	0.383783	-1.38164	2.92548e-113	7.41687e-111	down
TraesCS2A02G111200	2.28482	1.19208	0.00126183	0.00610088	up		TraesCS1D02G114500	0.33018	-1.59868	0.00322069	0.0138938	down
TraesCS2A02G112800	2.6292	1.39463	0.00864693	0.0326276	up		TraesCS1D02G116400	0.429682	-1.21866	1.12959e-28	4.22274e-27	down
TraesCS2A02G114000	2.23041	1.15731	1.91974e-10	2.49988e-09	up		TraesCS1D02G116600	0.383821	-1.38149	1.84589e-17	4.01694e-16	down
TraesCS2A02G117600	2.11693	1.08197	0.00935884	0.0348887	up		TraesCS1D02G116800	0.109036	-3.19712	0.00181259	0.00838159	down
TraesCS2A02G119600	14.4016	3.84816	1.427e-27	5.11718e-26	up		TraesCS1D02G119300	0.05386	-4.21464	0.00839777	0.0318513	down
TraesCS2A02G120900	2.68055	1.42253	0.00784624	0.0300705	up		TraesCS1D02G119900	0.0822061	-3.60461	1.65032e-21	4.54498e-20	down
TraesCS2A02G121000	4.85016	2.27803	1.86356e-78	2.54564e-76	up		TraesCS1D02G120500	0.0912325	-3.45431	1.80148e-11	2.56195e-10	down
TraesCS2A02G126500	4.24175	2.08466	0.000261008	0.0014778	up		TraesCS1D02G120700	0.120392	-3.05419	5.03004e-07	4.45943e-06	down
TraesCS2A02G136200	4.34891	2.12065	1.53404e-19	3.76825e-18	up		TraesCS1D02G122600	0.373845	-1.41949	2.85761e-57	2.52943e-55	down
TraesCS2A02G136500	171.664	7.42344	4.3502e-09	4.94197e-08	up		TraesCS1D02G126500	0.0281321	-5.15164	0.00192067	0.00881192	down
TraesCS2A02G147000	2.12121	1.08488	0.00699239	0.0272715	up		TraesCS1D02G128000	0.453826	-1.13979	1.234e-17	2.71899e-16	down
TraesCS2A02G149600	3.41087	1.77014	0.00122172	0.00592742	up		TraesCS1D02G128400	0.285355	-1.80917	1.16205e-08	1.25685e-07	down
TraesCS2A02G159100	4.20304	2.07143	7.3821e-11	9.95161e-10	up		TraesCS1D02G135900	0.212383	-2.23526	3.7119e-10	4.68317e-09	down
TraesCS2A02G167400	2.53507	1.34203	6.54355e-05	0.000420232	up		TraesCS1D02G141000	0.392687	-1.34855	1.22085e-07	1.16902e-06	down
TraesCS2A02G169700	2.56495	1.35893	8.66194e-05	0.000544082	up		TraesCS1D02G142100	0.253942	-1.97743	8.17555e-19	1.93496e-17	down
TraesCS2A02G170900	2.44954	1.29251	7.66494e-17	1.60726e-15	up		TraesCS1D02G142600	0.371556	-1.42835	4.1052e-18	9.33932e-17	down
TraesCS2A02G188900	20.8873	4.38455	0.0137794	0.0484455	up		TraesCS1D02G145400	0.043233	-4.53172	8.4639e-06	6.33194e-05	down
TraesCS2A02G201800	2.05035	1.03587	1.06789e-07	1.03119e-06	up		TraesCS1D02G146900	0.368082	-1.4419	1.65505e-12	2.57028e-11	down
TraesCS2A02G206400	39.1677	5.29159	1.08897e-08	1.18113e-07	up		TraesCS1D02G147700	0.188171	-2.40988	0.0138715	0.0487248	down
TraesCS2A02G208300	2.90403	1.53806	0.00952872	0.0354426	up		TraesCS1D02G147900	0.121352	-3.04273	4.98698e-07	4.4238e-06	down
TraesCS2A02G211900	29.795	4.897	0.00326768	0.0140512	up		TraesCS1D02G148500	0.448675	-1.15626	3.68112e-08	3.74414e-07	down
TraesCS2A02G213800	2.22752	1.15544	0.00605983	0.0240593	up		TraesCS1D02G149800	0.00460431	-7.7628	1.89274e-88	3.18595e-86	down
TraesCS2A02G217000	8.68384	3.11833	5.15752e-06	3.98919e-05	up		TraesCS1D02G149900	0.336548	-1.57111	1.55523e-11	2.22822e-10	down
TraesCS2A02G218900	5.27075	2.39801	1.0993e-52	8.45499e-51	up		TraesCS1D02G150600	0.42616	-1.23053	6.65768e-07	5.80552e-06	down
TraesCS2A02G219100	37.0602	5.2118	0.00163668	0.00766276	up		TraesCS1D02G151900	0.376738	-1.40837	5.4016e-07	4.76805e-06	down
TraesCS2A02G219400	2.1811	1.12506	0.00422455	0.0175722	up		TraesCS1D02G154700	0.230803	-2.11527	5.9386e-05	0.000384104	down
TraesCS2A02G219900	10.2094	3.35183	0.00758892	0.0292061	up		TraesCS1D02G155400	0.0859014	-3.54117	4.83734e-27	1.70391e-25	down
TraesCS2A02G256200	11.3618	3.50612	1.06157e-21	2.94862e-20	up		TraesCS1D02G156900	0.415119	-1.2684	0.00689184	0.026927	down
TraesCS2A02G261900	2.47644	1.30827	5.50801e-07	4.85426e-06	up		TraesCS1D02G157200	0.227832	-2.13396	0.00753645	0.0290313	down
TraesCS2A02G262800	19.0595	4.25244	0.0108489	0.0395646	up		TraesCS1D02G160200	0.488866	-1.03249	0.000102185	0.000633203	down
TraesCS2A02G265700	2.54884	1.34984	0.00119562	0.00580905	up		TraesCS1D02G161900	0.190841	-2.38956	1.89663e-09	2.23885e-08	down
TraesCS2A02G265800	2.43338	1.28296	1.95936e-06	1.60947e-05	up		TraesCS1D02G163600	0.17429	-2.52043	1.23869e-05	9.00546e-05	down
TraesCS2A02G268400	2.17683	1.12223	4.97549e-08	4.99308e-07	up		TraesCS1D02G163900	0.338541	-1.5626	2.94158e-11	4.10934e-10	down
TraesCS2A02G271300	2.37725	1.2493	2.53467e-16	5.15359e-15	up		TraesCS1D02G165600	0.337754	-1.56596	4.25029e-55	3.48201e-53	down
TraesCS2A02G275700	2.97193	1.5714	0.00083373	0.00420496	up		TraesCS1D02G166100	0.499213	-1.00227	1.46152e-21	4.03766e-20	down
TraesCS2A02G278800	2.73013	1.44897	0.00388291	0.0163275	up		TraesCS1D02G167400	0.307902	-1.69946	0.000481641	0.00257372	down
TraesCS2A02G285300	2.69839	1.4321	4.70334e-37	2.34243e-35	up		TraesCS1D02G167600	0.362868	-1.46248	3.94588e-62	3.84642e-60	down
TraesCS2A02G288000	14.2642	3.83433	4.84213e-08	4.86876e-07	up		TraesCS1D02G173800	0.4325	-1.20923	5.42816e-35	2.49748e-33	down
TraesCS2A02G291000	2.39333	1.25902	4.97076e-21	1.32799e-19	up		TraesCS1D02G173900	0.27754	-1.84923	0.00807942	0.0308337	down
TraesCS2A02G301500	2.00191	1.00138	0.0031708	0.0137102	up		TraesCS1D02G175000	0.447857	-1.15889	1.81408e-74	2.26693e-72	down
TraesCS2A02G303100	3.15171	1.65613	3.93591e-15	7.35902e-14	up		TraesCS1D02G175700	0.309677	-1.69117	1.74345e-78	2.38686e-76	down
TraesCS2A02G303800	2.27992	1.18898	0.00317808	0.0137388	up		TraesCS1D02G176400	0.47714	-1.06751	1.04693e-06	8.91723e-06	down
TraesCS2A02G304200	2.20282	1.13935	9.2513e-08	9.00386e-07	up		TraesCS1D02G177700	0.0266356	-5.2305	0	0	down
TraesCS2A02G305900	4.33085	2.11465	2.09582e-08	2.19736e-07	up		TraesCS1D02G178200	0.314533	-1.66872	3.41273e-06	2.71113e-05	down
TraesCS2A02G306000	7.32326	2.87249	0.000795132	0.00403506	up		TraesCS1D02G180300	0.0454366	-4.46	0.000374922	0.00205698	down
TraesCS2A02G311400	2.56211	1.35733	0.00237148	0.0105915	up		TraesCS1D02G185300	0.46513	-1.10429	0.0039902	0.0167258	down
TraesCS2A02G313400	5.01931	2.32749	8.82467e-28	3.18303e-26	up		TraesCS1D02G189600	0.272885	-1.87364	2.53788e-99	5.09288e-97	down
TraesCS2A02G316000	9.01087	3.17167	0.000601727	0.00314025	up		TraesCS1D02G190100	0.290612	-1.78283	1.80129e-110	4.42119e-108	down
TraesCS2A02G318600	3.15081	1.65572	1.10035e-19	2.72573e-18	up		TraesCS1D02G190200	0.139222	-2.84454	1.96329e-72	2.37162e-70	down
TraesCS2A02G318800	11.7154	3.55033	7.09017e-09	7.86326e-08	up		TraesCS1D02G190500	0.0480227	-4.38014	0.00065204	0.00337792	down
TraesCS2A02G319000	2.54008	1.34487	2.15541e-09	2.53026e-08	up		TraesCS1D02G191100	0.288912	-1.7913	4.38248e-66	4.62314e-64	down
TraesCS2A02G321600	2.14146	1.0986	3.29141e-07	2.98768e-06	up		TraesCS1D02G195700	0.278234	-1.84563	1.65906e-77	2.21713e-75	down
TraesCS2A02G323200	2.7543	1.46169	8.6285e-12	1.26265e-10	up		TraesCS1D02G198500	0.457212	-1.12907	1.5276e-46	1.00761e-44	down
TraesCS2A02G331000	2.57601	1.36514	3.11508e-12	4.72453e-11	up		TraesCS1D02G204900	0.455896	-1.13322	1.76765e-37	8.91161e-36	down
TraesCS2A02G333000	3.10025	1.63238	3.48945e-08	3.55742e-07	up		TraesCS1D02G205100	0.0448552	-4.47858	0.0057593	0.0230338	down
TraesCS2A02G334600	2.33659	1.2244	1.38033e-15	2.66492e-14	up		TraesCS1D02G206700	0.418143	-1.25793	3.53165e-06	2.79767e-05	down
TraesCS2A02G336600	2.0874	1.06171	0.00828793	0.0314968	up		TraesCS1D02G207000	0.118749	-3.07401	1.07207e-240	1.06527e-237	down
TraesCS2A02G338300	8.31545	3.05579	4.56745e-19	1.09149e-17	up		TraesCS1D02G207100	0.074179	-3.75285	0.000221183	0.00127159	down
TraesCS2A02G340400	2.18491	1.12757	0.00144021	0.00685998	up		TraesCS1D02G208400	0.152044	-2.71743	0.00042558	0.00230474	down
TraesCS2A02G341500	3.35061	1.74443	2.79013e-06	2.24489e-05	up		TraesCS1D02G209500	0.353499	-1.50022	2.73573e-07	2.50729e-06	down
TraesCS2A02G342700	3.63314	1.86122	3.03554e-10	3.87908e-09	up		TraesCS1D02G210100	0.461606	-1.11526	4.23425e-08	4.28834e-07	down
TraesCS2A02G348300	2.64687	1.40429	1.22522e-19	3.0217e-18	up		TraesCS1D02G216500	0.384599	-1.37857	0.000572696	0.00300364	down
TraesCS2A02G358000	2.07656	1.0542	5.50772e-05	0.000358342	up		TraesCS1D02G218300	0.4224	-1.24332	1.12611e-32	4.81778e-31	down
TraesCS2A02G360300	2.40956	1.26877	7.90213e-18	1.7645e-16	up		TraesCS1D02G228900	0.202667	-2.30282	3.44752e-08	3.51816e-07	down
TraesCS2A02G363800	2.15432	1.10723	1.47774e-07	1.39759e-06	up		TraesCS1D02G229700	0.365993	-1.45011	0.00072443	0.00371558	down
TraesCS2A02G364100	2.27617	1.18661	1.0545e-07	1.01953e-06	up		TraesCS1D02G230000	0.387725	-1.3669	2.36973e-47	1.59554e-45	down
TraesCS2A02G365500	3.4567	1.78939	1.73461e-07	1.62605e-06	up		TraesCS1D02G230300	0.244736	-2.0307	0.00383441	0.0161556	down
TraesCS2A02G367700	3.49085	1.80358	3.50835e-53	2.74986e-51	up		TraesCS1D02G233100	0.406134	-1.29997	0.010953	0.0398806	down
TraesCS2A02G373200	2.59469	1.37556	0.0066675	0.0261467	up		TraesCS1D02G233400	0.388544	-1.36385	2.57608e-10	3.31816e-09	down
TraesCS2A02G376400	5.32357	2.41239	4.27896e-05	0.000284149	up		TraesCS1D02G233800	0.229884	-2.12102	1.68935e-13	2.82815e-12	down
TraesCS2A02G377100	6.48096	2.69621	0.00379205	0.0160012	up		TraesCS1D02G234600	0.372368	-1.4252	6.63716e-24	2.02926e-22	down
TraesCS2A02G381600	2.7868	1.47861	5.95688e-07	5.22697e-06	up		TraesCS1D02G237100	0.316223	-1.66098	2.0072e-21	5.50322e-20	down
TraesCS2A02G389200	21.6211	4.43437	7.10466e-06	5.37315e-05	up		TraesCS1D02G237500	0.494163	-1.01694	1.08288e-05	7.93825e-05	down
TraesCS2A02G389400	4.24498	2.08576	5.27994e-55	4.30836e-53	up		TraesCS1D02G238800	0.31136	-1.68334	1.51738e-07	1.43289e-06	down
TraesCS2A02G390600	2.10694	1.07515	0.00117805	0.00573225	up		TraesCS1D02G238900	0.141025	-2.82598	3.93525e-161	1.78264e-158	down
TraesCS2A02G394600	4.08515	2.03039	0.00235981	0.0105432	up		TraesCS1D02G239500	0.0850737	-3.55514	0.00330747	0.0141995	down
TraesCS2A02G395000	2.11856	1.08308	5.32303e-20	1.34016e-18	up		TraesCS1D02G240500	0.305678	-1.70991	0.00870819	0.0328166	down
TraesCS2A02G399200	2.86069	1.51636	1.29572e-73	1.5965e-71	up		TraesCS1D02G242500	0.4834	-1.04871	1.82139e-27	6.50873e-26	down
TraesCS2A02G401000	2.437	1.28511	1.15755e-18	2.71462e-17	up		TraesCS1D02G249800	0.0562992	-4.15074	0.00179647	0.0083202	down
TraesCS2A02G409300	15.3355	3.93881	0.012314	0.0440499	up		TraesCS1D02G252500	0.339739	-1.5575	7.33363e-06	5.53341e-05	down
TraesCS2A02G409400	19.0556	4.25214	2.64979e-05	0.000182748	up		TraesCS1D02G256900	0.341772	-1.54889	0.00489252	0.0199916	down
TraesCS2A02G419000	19.9274	4.31668	0.00399027	0.0167258	up		TraesCS1D02G263200	0.0171199	-5.86818	1.69206e-16	3.4736e-15	down
TraesCS2A02G419200	2.74278	1.45564	3.60445e-08	3.6698e-07	up		TraesCS1D02G266200	0.12722	-2.97461	3.22735e-06	2.57448e-05	down
TraesCS2A02G420700	4.72077	2.23902	0.00889109	0.0333951	up		TraesCS1D02G268500	0.267548	-1.90213	3.22317e-14	5.67668e-13	down
TraesCS2A02G420800	2.23073	1.15752	1.0788e-19	2.67666e-18	up		TraesCS1D02G268700	0.485387	-1.04279	1.04396e-12	1.64911e-11	down
TraesCS2A02G421500	2.70787	1.43716	0.000501053	0.0026652	up		TraesCS1D02G269000	0.424683	-1.23554	1.20522e-09	1.44991e-08	down
TraesCS2A02G425500	2.7172	1.44212	2.07134e-39	1.11644e-37	up		TraesCS1D02G275200	0.0401473	-4.63855	0.000203624	0.00118134	down
TraesCS2A02G426200	2.72821	1.44796	4.20275e-09	4.78505e-08	up		TraesCS1D02G278800	0.280306	-1.83493	1.0729e-35	5.08058e-34	down
TraesCS2A02G431100	2.06344	1.04505	6.61395e-08	6.54353e-07	up		TraesCS1D02G279800	0.0138026	-6.17892	1.3411e-05	9.70416e-05	down
TraesCS2A02G432800	4.74214	2.24554	8.673e-30	3.40764e-28	up		TraesCS1D02G280200	0.352424	-1.50461	1.51151e-20	3.92577e-19	down
TraesCS2A02G433500	2.51014	1.32777	3.04743e-38	1.56845e-36	up		TraesCS1D02G284000	0.437129	-1.19387	5.05194e-06	3.91342e-05	down
TraesCS2A02G437200	2.66521	1.41425	1.98378e-25	6.49042e-24	up		TraesCS1D02G285900	0.238093	-2.0704	9.63871e-14	1.64445e-12	down
TraesCS2A02G442200	2.36737	1.24328	0.00337394	0.0144507	up		TraesCS1D02G286100	0.0137438	-6.18508	1.31061e-25	4.32705e-24	down
TraesCS2A02G443600	3.50465	1.80927	2.19762e-20	5.65298e-19	up		TraesCS1D02G288400	0.267841	-1.90055	1.56432e-09	1.86264e-08	down
TraesCS2A02G444000	4.37716	2.12999	0.00181112	0.00837734	up		TraesCS1D02G289800	0.370836	-1.43115	1.52924e-102	3.27124e-100	down
TraesCS2A02G446100	2.48212	1.31157	0.000663816	0.00343373	up		TraesCS1D02G290100	0.363629	-1.45946	0.000361472	0.00198868	down
TraesCS2A02G453400	2.64784	1.40482	1.50772e-10	1.98305e-09	up		TraesCS1D02G293900	0.259403	-1.94673	8.6685e-29	3.25833e-27	down
TraesCS2A02G453700	4.29645	2.10315	1.82912e-15	3.49524e-14	up		TraesCS1D02G296600	0.240738	-2.05447	4.5973e-20	1.16314e-18	down
TraesCS2A02G464600	3.17725	1.66778	2.01489e-12	3.10484e-11	up		TraesCS1D02G299700	0.00904851	-6.7881	3.53384e-10	4.47317e-09	down
TraesCS2A02G464900	2.14343	1.09992	2.27311e-09	2.66134e-08	up		TraesCS1D02G303700	0.406568	-1.29843	6.52335e-80	9.30287e-78	down
TraesCS2A02G465000	2.04727	1.0337	1.43134e-11	2.05645e-10	up		TraesCS1D02G307200	0.462291	-1.11313	3.55177e-17	7.59244e-16	down
TraesCS2A02G466900	2.22824	1.1559	5.05858e-06	3.91808e-05	up		TraesCS1D02G307900	0.373143	-1.4222	4.38034e-29	1.66375e-27	down
TraesCS2A02G468500	2.89012	1.53113	1.97669e-10	2.56861e-09	up		TraesCS1D02G309200	0.311881	-1.68093	0.00561465	0.0225343	down
TraesCS2A02G471300	2.0842	1.05949	3.29311e-08	3.36728e-07	up		TraesCS1D02G309400	0.210981	-2.24482	0.00635265	0.02507	down
TraesCS2A02G474500	8.42783	3.07516	3.17907e-08	3.25932e-07	up		TraesCS1D02G310600	0.138119	-2.85601	0.00463625	0.0190697	down
TraesCS2A02G478600	2.45104	1.2934	1.45405e-05	0.000104549	up		TraesCS1D02G311300	0.419459	-1.2534	0.00322282	0.013901	down
TraesCS2A02G485100	2.57369	1.36384	1.81668e-12	2.81207e-11	up		TraesCS1D02G312000	0.00536521	-7.54215	3.55874e-09	4.08122e-08	down
TraesCS2A02G485600	2.55394	1.35272	7.27823e-05	0.00046374	up		TraesCS1D02G312600	0.342348	-1.54647	4.07586e-32	1.71517e-30	down
TraesCS2A02G485700	2.51562	1.33091	0.00089569	0.00448479	up		TraesCS1D02G313100	0.0199259	-5.64921	1.24214e-59	1.16122e-57	down
TraesCS2A02G487500	2.06358	1.04515	0.00714823	0.0277861	up		TraesCS1D02G313800	0.294582	-1.76326	1.9229e-111	4.77677e-109	down
TraesCS2A02G488200	3.05004	1.60883	0.0069244	0.0270354	up		TraesCS1D02G324200	0.123795	-3.01398	0	0	down
TraesCS2A02G488900	3.56194	1.83266	4.94053e-40	2.70312e-38	up		TraesCS1D02G325300	0.339001	-1.56064	2.07598e-05	0.000145434	down
TraesCS2A02G492300	2.48795	1.31496	5.03319e-10	6.27945e-09	up		TraesCS1D02G336800	0.0301403	-5.05216	0.00239567	0.0106833	down
TraesCS2A02G493500	26.9216	4.75069	0.00434909	0.0180209	up		TraesCS1D02G337300	0.414748	-1.26969	2.572e-14	4.55588e-13	down
TraesCS2A02G493800	2.56382	1.35829	1.64921e-14	2.95873e-13	up		TraesCS1D02G337400	0.270152	-1.88816	1.09777e-09	1.32869e-08	down
TraesCS2A02G499900	2.39481	1.25991	0.0141409	0.0495078	up		TraesCS1D02G340600	0.184387	-2.43919	1.0028e-27	3.61073e-26	down
TraesCS2A02G504200	5.67636	2.50497	0.00122467	0.00593839	up		TraesCS1D02G340700	0.305267	-1.71186	2.00781e-06	1.6462e-05	down
TraesCS2A02G504800	2.75286	1.46093	0.00082667	0.00417379	up		TraesCS1D02G340800	0.343662	-1.54094	1.20243e-08	1.29802e-07	down
TraesCS2A02G507400	15.7221	3.97473	3.89562e-102	8.24733e-100	up		TraesCS1D02G341100	0.44141	-1.17981	3.60506e-11	4.99432e-10	down
TraesCS2A02G507500	9.65295	3.27097	1.13765e-28	4.2503e-27	up		TraesCS1D02G341700	0.0715597	-3.80471	7.92569e-10	9.71504e-09	down
TraesCS2A02G508300	2.77585	1.47293	0.00807459	0.0308191	up		TraesCS1D02G344900	0.195222	-2.35681	2.52489e-80	3.65143e-78	down
TraesCS2A02G510700	2.48699	1.3144	2.35341e-09	2.75116e-08	up		TraesCS1D02G345400	0.0768866	-3.70112	0.000202287	0.00117469	down
TraesCS2A02G510800	11.9554	3.57959	4.37834e-238	4.21463e-235	up		TraesCS1D02G350100	0.286923	-1.80126	1.68082e-25	5.51975e-24	down
TraesCS2A02G521400	2.90906	1.54055	1.19441e-12	1.87427e-11	up		TraesCS1D02G350200	0.189091	-2.40284	8.57918e-69	9.5232e-67	down
TraesCS2A02G527700	2.78623	1.47832	0.00304774	0.0132497	up		TraesCS1D02G351500	0.478897	-1.06221	1.53171e-09	1.82522e-08	down
TraesCS2A02G533400	58.3179	5.86587	3.6571e-05	0.000245669	up		TraesCS1D02G351800	0.0351783	-4.82917	6.06797e-05	0.000391773	down
TraesCS2A02G534400	4.7213	2.23918	3.70269e-12	5.58412e-11	up		TraesCS1D02G353800	0.134646	-2.89276	1.07546e-142	3.89739e-140	down
TraesCS2A02G537000	2.92568	1.54877	0.00413715	0.0172529	up		TraesCS1D02G355100	0.0571579	-4.1289	5.3076e-08	5.30906e-07	down
TraesCS2A02G538100	16.2289	4.02049	0.00188501	0.00867286	up		TraesCS1D02G360000	0.376231	-1.41031	5.49855e-06	4.23278e-05	down
TraesCS2A02G539300	2.27124	1.18348	1.68206e-22	4.81984e-21	up		TraesCS1D02G361400	0.425883	-1.23147	3.24438e-06	2.58707e-05	down
TraesCS2A02G540900	2.06774	1.04806	0.00823791	0.0313357	up		TraesCS1D02G362700	0.259144	-1.94817	5.39504e-44	3.31709e-42	down
TraesCS2A02G543200	2.90573	1.5389	0.00980596	0.036305	up		TraesCS1D02G367600	0.491726	-1.02407	7.62284e-23	2.21102e-21	down
TraesCS2A02G545100	2.69415	1.42983	0.0117658	0.0423745	up		TraesCS1D02G370100	0.475876	-1.07134	2.04935e-09	2.41081e-08	down
TraesCS2A02G548100	2.0278	1.01991	0.00812261	0.030964	up		TraesCS1D02G372600	0.477279	-1.06709	5.87761e-07	5.16182e-06	down
TraesCS2A02G564700	2.44081	1.28736	0.000268487	0.0015161	up		TraesCS1D02G375000	0.0115296	-6.43852	3.87432e-06	3.05419e-05	down
TraesCS2A02G566200	2.90954	1.54079	2.3506e-12	3.59517e-11	up		TraesCS1D02G375100	0.0145387	-6.10396	3.18726e-05	0.000216443	down
TraesCS2A02G566400	7.91536	2.98465	0.000152762	0.000910086	up		TraesCS1D02G375500	0.0717106	-3.80167	4.16549e-19	9.98146e-18	down
TraesCS2A02G576400	2.04354	1.03107	2.8271e-05	0.000193823	up		TraesCS1D02G375600	0.105127	-3.2498	0.00189976	0.00872833	down
TraesCS2A02G577000	3.89949	1.96328	2.20432e-08	2.30407e-07	up		TraesCS1D02G375700	0.0379731	-4.71888	0	0	down
TraesCS2A02G584328	4.19809	2.06973	1.23206e-05	8.95933e-05	up		TraesCS1D02G376500	0.114791	-3.12292	8.70373e-24	2.64013e-22	down
TraesCS2A02G584700	4.5402	2.18276	0.000539813	0.00285045	up		TraesCS1D02G376600	0.330466	-1.59743	1.92585e-10	2.50625e-09	down
TraesCS2A02G586800	3.5558	1.83017	2.95624e-05	0.000202002	up		TraesCS1D02G376700	0.287458	-1.79858	2.20215e-11	3.11022e-10	down
TraesCS2B02G001600	3.49547	1.80549	2.29743e-40	1.26826e-38	up		TraesCS1D02G376800	0.306336	-1.70681	7.13353e-22	1.99555e-20	down
TraesCS2B02G001700	4.36422	2.12572	7.70917e-09	8.51755e-08	up		TraesCS1D02G378600	0.0363381	-4.78237	1.54666e-06	1.28903e-05	down
TraesCS2B02G005400	2.00758	1.00546	2.90144e-13	4.76791e-12	up		TraesCS1D02G379000	0.219655	-2.18669	5.58287e-102	1.17387e-99	down
TraesCS2B02G005500	2.45124	1.29351	1.33399e-08	1.43351e-07	up		TraesCS1D02G383900	0.21177	-2.23943	0.00826781	0.0314339	down
TraesCS2B02G005700	3.00767	1.58865	2.55886e-06	2.07044e-05	up		TraesCS1D02G385500	0.386306	-1.37218	1.97542e-10	2.5675e-09	down
TraesCS2B02G006300	459.455	8.84378	3.29544e-13	5.4024e-12	up		TraesCS1D02G387000	0.264755	-1.91727	6.42322e-07	5.61378e-06	down
TraesCS2B02G006700	215.677	7.75273	1.8443e-10	2.40542e-09	up		TraesCS1D02G389100	0.093229	-3.42308	4.80439e-22	1.35462e-20	down
TraesCS2B02G006800	268.666	8.06967	6.48636e-11	8.80382e-10	up		TraesCS1D02G389200	0.14459	-2.78996	8.78317e-35	4.02608e-33	down
TraesCS2B02G008000	4.77844	2.25654	0.00209586	0.00950178	up		TraesCS1D02G392900	0.218955	-2.1913	0.0134625	0.0474819	down
TraesCS2B02G010500	2.67884	1.42161	1.19626e-19	2.95382e-18	up		TraesCS1D02G402600	0.251901	-1.98907	7.53371e-05	0.000478287	down
TraesCS2B02G013000	8.27707	3.04912	0.00982695	0.0363718	up		TraesCS1D02G403500	0.427339	-1.22655	0.0112946	0.0409416	down
TraesCS2B02G023500	13.4212	3.74644	5.17128e-05	0.000338382	up		TraesCS1D02G404800	0.0998245	-3.32446	1.54916e-302	2.65108e-299	down
TraesCS2B02G023600	14.7978	3.88731	3.49193e-05	0.00023542	up		TraesCS1D02G405200	0.435849	-1.1981	8.75646e-13	1.39072e-11	down
TraesCS2B02G027000	9.17409	3.19756	6.47574e-44	3.96966e-42	up		TraesCS1D02G410600	0.413825	-1.27291	1.06302e-06	9.05049e-06	down
TraesCS2B02G030600	2.89576	1.53394	9.27587e-06	6.89002e-05	up		TraesCS1D02G411300	0.0866277	-3.52903	0	0	down
TraesCS2B02G031100	27.592	4.78618	0.000763952	0.00389319	up		TraesCS1D02G417900	0.481439	-1.05458	1.57318e-28	5.84906e-27	down
TraesCS2B02G032900	24.0191	4.58611	0.00956655	0.0355554	up		TraesCS1D02G418000	0.118587	-3.07598	7.16105e-09	7.93758e-08	down
TraesCS2B02G033300	2.33941	1.22615	0.0141626	0.0495664	up		TraesCS1D02G420900	0.177737	-2.49218	8.72583e-07	7.50066e-06	down
TraesCS2B02G034200	2.50473	1.32465	2.15063e-05	0.000150322	up		TraesCS1D02G426900	0.352542	-1.50413	3.64609e-05	0.000244983	down
TraesCS2B02G034600	3.91584	1.96932	7.26887e-15	1.33516e-13	up		TraesCS1D02G428200	0.250739	-1.99574	5.76644e-79	8.00119e-77	down
TraesCS2B02G036400	5.36117	2.42255	0.00864953	0.0326335	up		TraesCS1D02G429200	0.370617	-1.432	0.0121523	0.0435399	down
TraesCS2B02G043700	3.51238	1.81245	5.12801e-108	1.19667e-105	up		TraesCS1D02G429600	0.41996	-1.25168	4.2391e-06	3.32123e-05	down
TraesCS2B02G045500	4.81476	2.26746	0.000623622	0.00324489	up		TraesCS1D02G433200	0.443512	-1.17295	0.000321846	0.00178937	down
TraesCS2B02G045800	8.11836	3.02119	1.06433e-11	1.54465e-10	up		TraesCS1D02G436700	0.436778	-1.19503	0.000327647	0.0018185	down
TraesCS2B02G049700	2.50279	1.32354	7.88237e-07	6.81557e-06	up		TraesCS1D02G437100	0.00891818	-6.80904	7.29746e-08	7.17482e-07	down
TraesCS2B02G052200	73.7352	6.20428	1.03742e-08	1.1276e-07	up		TraesCS1D02G437300	0.442848	-1.17512	0.000936174	0.00466625	down
TraesCS2B02G060900	2.22668	1.1549	7.39282e-08	7.26382e-07	up		TraesCS1D02G440500	0.112048	-3.15781	7.43002e-216	5.51496e-213	down
TraesCS2B02G066000	2.49086	1.31664	0.000615583	0.00320441	up		TraesCS1D02G444100	0.348256	-1.52178	3.62894e-06	2.87178e-05	down
TraesCS2B02G067000	2.12966	1.09062	6.17609e-28	2.24213e-26	up		TraesCS2A02G010000	0.289625	-1.78774	1.84228e-27	6.57575e-26	down
TraesCS2B02G072300	4.09013	2.03215	6.27565e-12	9.29161e-11	up		TraesCS2A02G016500	0.146606	-2.76999	0.00229352	0.0102866	down
TraesCS2B02G077100	2.53098	1.33969	8.44196e-47	5.60435e-45	up		TraesCS2A02G025800	0.226447	-2.14275	0.00857126	0.0323877	down
TraesCS2B02G078500	2.25035	1.17015	0.000543784	0.00286847	up		TraesCS2A02G026600	0.329523	-1.60155	2.56362e-25	8.30811e-24	down
TraesCS2B02G078600	2.27766	1.18755	0.00322614	0.0139124	up		TraesCS2A02G028700	0.426262	-1.23019	1.12565e-10	1.49683e-09	down
TraesCS2B02G082400	2.83358	1.50263	0.0020219	0.00920849	up		TraesCS2A02G030300	0.321338	-1.63784	1.15427e-08	1.2494e-07	down
TraesCS2B02G093100	8.83368	3.14302	7.03483e-80	9.98605e-78	up		TraesCS2A02G030800	0.377568	-1.40519	8.82791e-06	6.58747e-05	down
TraesCS2B02G106200	2.0629	1.04467	4.94719e-06	3.83759e-05	up		TraesCS2A02G030900	0.243752	-2.03651	3.5528e-05	0.000239079	down
TraesCS2B02G107100	3.48171	1.79979	3.27866e-05	0.000222136	up		TraesCS2A02G035400	0.267234	-1.90382	2.2965e-05	0.000159991	down
TraesCS2B02G110300	2.01924	1.01381	0.000409321	0.00222549	up		TraesCS2A02G038400	0.281059	-1.83105	2.87785e-11	4.02122e-10	down
TraesCS2B02G118000	2.08052	1.05694	3.75981e-05	0.000252156	up		TraesCS2A02G039400	0.379193	-1.399	2.72155e-31	1.11185e-29	down
TraesCS2B02G118200	10.4012	3.37868	1.10814e-12	1.74378e-11	up		TraesCS2A02G040300	0.37939	-1.39825	4.1821e-24	1.29081e-22	down
TraesCS2B02G118300	26.594	4.73303	2.34045e-11	3.2995e-10	up		TraesCS2A02G043300	0.29766	-1.74826	9.88224e-05	0.000614397	down
TraesCS2B02G118400	12.9156	3.69104	8.58886e-48	5.89236e-46	up		TraesCS2A02G065700	0.0338575	-4.88438	0.00475823	0.0195154	down
TraesCS2B02G118500	2.34578	1.23007	9.00134e-62	8.66478e-60	up		TraesCS2A02G066700	0.161618	-2.62934	0	0	down
TraesCS2B02G119000	34.8655	5.12373	3.86074e-43	2.32501e-41	up		TraesCS2A02G066800	0.343655	-1.54097	4.7147e-163	2.2343e-160	down
TraesCS2B02G119100	12.0897	3.59571	4.13173e-99	8.18468e-97	up		TraesCS2A02G066900	0.197113	-2.34291	3.39618e-238	3.32109e-235	down
TraesCS2B02G121900	2.33861	1.22565	4.22845e-07	3.78416e-06	up		TraesCS2A02G067000	0.20027	-2.31998	8.42219e-24	2.56104e-22	down
TraesCS2B02G122700	2.20628	1.14162	0.00607366	0.0241033	up		TraesCS2A02G067100	0.0901285	-3.47187	4.37799e-91	7.72823e-89	down
TraesCS2B02G129600	8.63191	3.10968	4.12228e-25	1.32409e-23	up		TraesCS2A02G067300	0.315045	-1.66637	8.89164e-119	2.36115e-116	down
TraesCS2B02G135500	6.19552	2.63123	0.00176849	0.00820355	up		TraesCS2A02G071600	0.271561	-1.88065	1.04397e-22	3.01811e-21	down
TraesCS2B02G140300	3.2263	1.68988	1.14364e-06	9.68602e-06	up		TraesCS2A02G072700	0.0576417	-4.11674	0.0142177	0.0497338	down
TraesCS2B02G141900	2.73293	1.45045	2.33623e-19	5.68886e-18	up		TraesCS2A02G081400	0.393645	-1.34503	2.93302e-16	5.92889e-15	down
TraesCS2B02G160400	84.993	6.40927	9.70968e-44	5.92262e-42	up		TraesCS2A02G081900	0.410967	-1.2829	1.0227e-08	1.11278e-07	down
TraesCS2B02G161600	2.92664	1.54924	0.00354447	0.015071	up		TraesCS2A02G083600	0.447396	-1.16038	0.00145519	0.00692172	down
TraesCS2B02G169300	2.57883	1.36672	2.19553e-19	5.35046e-18	up		TraesCS2A02G088300	0.118974	-3.07129	1.13836e-08	1.23297e-07	down
TraesCS2B02G184400	3.17466	1.6666	3.31748e-07	3.01001e-06	up		TraesCS2A02G089400	0.179776	-2.47573	3.82173e-05	0.000256003	down
TraesCS2B02G184500	2.06563	1.04658	0.00119782	0.00581882	up		TraesCS2A02G091100	0.132884	-2.91176	1.38929e-39	7.52111e-38	down
TraesCS2B02G187200	4.94606	2.30628	0.00321038	0.0138598	up		TraesCS2A02G093700	0.222142	-2.17044	9.79603e-34	4.35743e-32	down
TraesCS2B02G196000	4.08209	2.02931	1.38314e-05	9.97439e-05	up		TraesCS2A02G093800	0.0188453	-5.72965	1.92567e-20	4.98674e-19	down
TraesCS2B02G202000	2.32598	1.21784	1.62503e-12	2.52556e-11	up		TraesCS2A02G094500	0.119418	-3.06591	0.000116517	0.000714131	down
TraesCS2B02G206900	2.36044	1.23906	1.13795e-07	1.09455e-06	up		TraesCS2A02G101700	0.484769	-1.04463	1.48134e-25	4.88025e-24	down
TraesCS2B02G210600	2.18347	1.12662	5.55146e-05	0.000360887	up		TraesCS2A02G104500	0.427241	-1.22688	1.91928e-11	2.72382e-10	down
TraesCS2B02G212100	6.96141	2.79938	0.0126987	0.0452238	up		TraesCS2A02G104600	0.291358	-1.77913	3.06139e-35	1.42127e-33	down
TraesCS2B02G219500	3.03484	1.60162	8.26057e-09	9.10554e-08	up		TraesCS2A02G104800	0.304133	-1.71723	2.80663e-23	8.29692e-22	down
TraesCS2B02G234300	2.91035	1.54119	6.83904e-26	2.28737e-24	up		TraesCS2A02G112600	0.245282	-2.02749	3.25446e-19	7.86265e-18	down
TraesCS2B02G236100	2.50408	1.32428	0.00016119	0.000955033	up		TraesCS2A02G113400	0.0130645	-6.2582	3.78685e-05	0.000253859	down
TraesCS2B02G236900	2.25102	1.17058	2.50841e-08	2.6082e-07	up		TraesCS2A02G114400	0.446093	-1.16458	2.09359e-58	1.89397e-56	down
TraesCS2B02G240800	2.10468	1.0736	0.0110296	0.0401337	up		TraesCS2A02G114600	0.0439551	-4.50782	8.53201e-130	2.62816e-127	down
TraesCS2B02G242800	2.18987	1.13085	0.00832075	0.031604	up		TraesCS2A02G116100	0.250346	-1.998	4.50738e-15	8.39946e-14	down
TraesCS2B02G243000	2.81087	1.49102	1.91674e-09	2.26085e-08	up		TraesCS2A02G120300	0.0871686	-3.52005	2.31832e-09	2.7122e-08	down
TraesCS2B02G244300	2.4735	1.30655	4.89301e-08	4.91591e-07	up		TraesCS2A02G134100	0.274254	-1.86642	1.2387e-09	1.48787e-08	down
TraesCS2B02G244500	3.44421	1.78417	0.0112287	0.0407304	up		TraesCS2A02G137500	0.297408	-1.74948	0.00132773	0.00638913	down
TraesCS2B02G247200	4.64897	2.21691	0.00316803	0.0137002	up		TraesCS2A02G139600	0.47962	-1.06004	0.00199201	0.00909522	down
TraesCS2B02G250100	2.36712	1.24313	1.00195e-10	1.33695e-09	up		TraesCS2A02G143200	0.0436706	-4.5172	1.48101e-34	6.74855e-33	down
TraesCS2B02G256000	3.93547	1.97654	7.44866e-05	0.000473423	up		TraesCS2A02G143400	0.136395	-2.87413	6.39098e-211	4.4742e-208	down
TraesCS2B02G263800	3.08743	1.62641	6.96823e-05	0.00044537	up		TraesCS2A02G146700	0.474015	-1.07699	0.00460339	0.018951	down
TraesCS2B02G264000	3.71329	1.8927	1.44774e-09	1.72951e-08	up		TraesCS2A02G152200	0.157379	-2.66768	1.117e-39	6.06301e-38	down
TraesCS2B02G267900	4.5782	2.19478	2.9125e-136	9.8588e-134	up		TraesCS2A02G152400	0.423781	-1.23861	5.57812e-91	9.8186e-89	down
TraesCS2B02G274500	2.28593	1.19278	0.00121269	0.00588578	up		TraesCS2A02G152500	0.0529324	-4.23971	5.48517e-157	2.37975e-154	down
TraesCS2B02G279200	2.02451	1.01758	0.000322365	0.00179209	up		TraesCS2A02G154900	0.092591	-3.43298	3.11817e-41	1.77052e-39	down
TraesCS2B02G280300	5.35587	2.42112	4.64186e-12	6.94948e-11	up		TraesCS2A02G156100	0.394147	-1.34319	1.94258e-59	1.80235e-57	down
TraesCS2B02G286300	3.60532	1.85013	5.03206e-18	1.13849e-16	up		TraesCS2A02G160100	0.420146	-1.25104	1.60852e-20	4.17423e-19	down
TraesCS2B02G286900	4.8427	2.27581	0.0082245	0.0312905	up		TraesCS2A02G160700	0.0205528	-5.60452	0.000346462	0.00191379	down
TraesCS2B02G289800	3.10439	1.63431	1.1632e-09	1.40347e-08	up		TraesCS2A02G161700	0.152703	-2.7112	4.3708e-114	1.11731e-111	down
TraesCS2B02G290000	2.49025	1.31629	0.00018748	0.00109562	up		TraesCS2A02G163600	0.407173	-1.29629	2.43545e-26	8.34022e-25	down
TraesCS2B02G304800	12.5091	3.64491	2.84549e-06	2.28734e-05	up		TraesCS2A02G166600	0.265979	-1.91061	2.18207e-20	5.61533e-19	down
TraesCS2B02G306600	3.09988	1.63221	7.73453e-06	5.81595e-05	up		TraesCS2A02G169500	0.232487	-2.10478	0.00490088	0.0200152	down
TraesCS2B02G311000	2.99049	1.58038	1.77301e-07	1.65952e-06	up		TraesCS2A02G169600	0.190874	-2.38931	5.00193e-85	7.98327e-83	down
TraesCS2B02G315900	2.1216	1.08515	0.00149994	0.0071044	up		TraesCS2A02G170300	0.308661	-1.69591	0.0110734	0.0402643	down
TraesCS2B02G316100	2.79983	1.48534	0.00231811	0.0103818	up		TraesCS2A02G183100	0.431454	-1.21272	3.76898e-22	1.06659e-20	down
TraesCS2B02G319700	4.11241	2.03998	5.87115e-07	5.15689e-06	up		TraesCS2A02G183200	0.111484	-3.16509	1.31234e-34	5.98886e-33	down
TraesCS2B02G320700	2.5949	1.37568	0.00172229	0.00801082	up		TraesCS2A02G183600	0.49497	-1.01459	5.01154e-05	0.000328593	down
TraesCS2B02G324400	2.32641	1.21811	4.93428e-47	3.29703e-45	up		TraesCS2A02G184300	0.163592	-2.61183	5.49109e-05	0.000357298	down
TraesCS2B02G332200	2.81955	1.49547	1.52813e-05	0.000109444	up		TraesCS2A02G186800	0.197471	-2.34029	0.0013325	0.00640897	down
TraesCS2B02G336900	11.4023	3.51125	4.56421e-17	9.7095e-16	up		TraesCS2A02G186900	0.0584716	-4.09612	0.0114743	0.0414896	down
TraesCS2B02G337100	9.07665	3.18216	2.11932e-06	1.73393e-05	up		TraesCS2A02G187200	0.25955	-1.94591	1.30849e-101	2.74191e-99	down
TraesCS2B02G338600	8.95717	3.16304	0.000121379	0.0007395	up		TraesCS2A02G189200	0.492192	-1.02271	4.56625e-07	4.06875e-06	down
TraesCS2B02G338900	2.36249	1.24031	0.00247622	0.0109964	up		TraesCS2A02G194500	0.00456524	-7.77509	1.48016e-47	1.00538e-45	down
TraesCS2B02G348800	2.75162	1.46028	4.02859e-18	9.17522e-17	up		TraesCS2A02G196400	0.409269	-1.28888	1.64384e-06	1.36558e-05	down
TraesCS2B02G350500	2.02759	1.01977	0.00886147	0.0333086	up		TraesCS2A02G196700	0.271734	-1.87973	3.38317e-51	2.50815e-49	down
TraesCS2B02G351300	2.71042	1.43852	5.09628e-11	6.98014e-10	up		TraesCS2A02G199000	0.192899	-2.37408	6.15474e-06	4.70032e-05	down
TraesCS2B02G351400	2.02883	1.02065	1.36136e-05	9.83346e-05	up		TraesCS2A02G199300	0.303691	-1.71932	2.99454e-32	1.26533e-30	down
TraesCS2B02G373300	6.1514	2.62091	2.3846e-11	3.35866e-10	up		TraesCS2A02G204500	0.333473	-1.58436	6.32774e-17	1.33322e-15	down
TraesCS2B02G376900	4.4424	2.15134	0.00181681	0.00839799	up		TraesCS2A02G204800	0.329222	-1.60287	1.12925e-52	8.67451e-51	down
TraesCS2B02G382300	2.8766	1.52437	1.63442e-09	1.94198e-08	up		TraesCS2A02G205700	0.161164	-2.6334	2.00499e-09	2.36111e-08	down
TraesCS2B02G384500	2.87397	1.52305	1.11423e-05	8.15354e-05	up		TraesCS2A02G206200	0.280784	-1.83247	4.86123e-89	8.29601e-87	down
TraesCS2B02G393900	2.86684	1.51946	0.00897931	0.0336653	up		TraesCS2A02G212300	0.459773	-1.12101	0.011622	0.0419353	down
TraesCS2B02G395600	2.8437	1.50777	1.16936e-05	8.53058e-05	up		TraesCS2A02G212900	0.298701	-1.74322	4.25816e-18	9.66946e-17	down
TraesCS2B02G398900	10.2726	3.36073	1.95885e-06	1.60926e-05	up		TraesCS2A02G214200	0.236997	-2.07706	2.25375e-74	2.81067e-72	down
TraesCS2B02G411900	2.11659	1.08174	1.007e-28	3.76674e-27	up		TraesCS2A02G214400	0.372986	-1.42281	6.76981e-108	1.57384e-105	down
TraesCS2B02G415300	2.535	1.34198	2.04832e-25	6.68737e-24	up		TraesCS2A02G215000	0.394309	-1.3426	2.19087e-95	4.14028e-93	down
TraesCS2B02G415900	2.13037	1.0911	3.92046e-07	3.52441e-06	up		TraesCS2A02G215300	0.0629457	-3.98975	4.62739e-10	5.7943e-09	down
TraesCS2B02G416700	2.7938	1.48223	0.00603747	0.0239782	up		TraesCS2A02G220500	0.0833978	-3.58385	1.2444e-05	9.04481e-05	down
TraesCS2B02G428200	2.79418	1.48242	0.00461585	0.0189959	up		TraesCS2A02G220600	0.350116	-1.51409	2.14567e-41	1.22966e-39	down
TraesCS2B02G430900	8.59211	3.10301	0.0029879	0.0130236	up		TraesCS2A02G225200	0.149416	-2.74259	0	0	down
TraesCS2B02G431800	4.54384	2.18391	0.00506773	0.0205964	up		TraesCS2A02G230100	0.35096	-1.51062	0.000198065	0.00115202	down
TraesCS2B02G439100	3.04396	1.60595	2.42033e-13	4.00309e-12	up		TraesCS2A02G243200	0.304617	-1.71493	2.6606e-37	1.33261e-35	down
TraesCS2B02G445900	114.029	6.83326	1.87577e-10	2.44521e-09	up		TraesCS2A02G247300	0.459588	-1.12159	5.60362e-46	3.64543e-44	down
TraesCS2B02G446500	2.22828	1.15593	6.58131e-06	5.00191e-05	up		TraesCS2A02G249900	0.48835	-1.03401	0.000104374	0.000645278	down
TraesCS2B02G451600	5.62168	2.491	5.86991e-30	2.3122e-28	up		TraesCS2A02G251800	0.463885	-1.10816	1.67157e-74	2.0931e-72	down
TraesCS2B02G451700	2.72298	1.44518	1.53044e-37	7.722e-36	up		TraesCS2A02G252600	0.395639	-1.33774	4.43962e-71	5.1412e-69	down
TraesCS2B02G452400	2.16071	1.11151	1.7755e-15	3.39911e-14	up		TraesCS2A02G260800	0.276985	-1.85212	0.0014839	0.00704031	down
TraesCS2B02G453400	2.1145	1.08032	2.31047e-06	1.88133e-05	up		TraesCS2A02G264800	0.21319	-2.22979	8.07174e-31	3.2694e-29	down
TraesCS2B02G456000	6.07144	2.60204	2.88353e-07	2.63491e-06	up		TraesCS2A02G268200	0.0803644	-3.6373	0.00180589	0.00835698	down
TraesCS2B02G456100	2.02334	1.01674	2.67986e-15	5.07058e-14	up		TraesCS2A02G269700	0.122427	-3.03	2.56371e-08	2.66345e-07	down
TraesCS2B02G464500	3.5654	1.83406	3.41065e-07	3.09e-06	up		TraesCS2A02G271900	0.221659	-2.17359	0.0107921	0.039388	down
TraesCS2B02G464700	10.4569	3.38638	1.42181e-12	2.21868e-11	up		TraesCS2A02G272400	0.454372	-1.13805	1.53642e-42	9.13648e-41	down
TraesCS2B02G464800	2.07595	1.05377	0.0135302	0.0476922	up		TraesCS2A02G274700	0.413192	-1.27512	7.24273e-57	6.35617e-55	down
TraesCS2B02G473900	28.3503	4.82529	0.00370208	0.0156666	up		TraesCS2A02G274800	0.427986	-1.22436	0.000110057	0.000677687	down
TraesCS2B02G474700	2.02578	1.01847	1.60342e-05	0.00011445	up		TraesCS2A02G277900	0.449321	-1.15418	1.43954e-64	1.48056e-62	down
TraesCS2B02G474900	3.46765	1.79396	1.52943e-05	0.000109511	up		TraesCS2A02G281700	0.450573	-1.15017	0.000721878	0.0037039	down
TraesCS2B02G475100	10.292	3.36346	1.07445e-22	3.10332e-21	up		TraesCS2A02G283600	0.129676	-2.94702	0.000819693	0.00414468	down
TraesCS2B02G475200	3.19103	1.67402	1.56814e-11	2.2441e-10	up		TraesCS2A02G284100	0.409986	-1.28635	0.00186438	0.00858824	down
TraesCS2B02G475600	3.38305	1.75832	0.0106503	0.0389325	up		TraesCS2A02G296400	0.12154	-3.0405	5.43129e-137	1.85892e-134	down
TraesCS2B02G478400	8.77221	3.13294	2.37643e-08	2.47724e-07	up		TraesCS2A02G297500	0.495021	-1.01444	6.93282e-36	3.30837e-34	down
TraesCS2B02G482000	2.38983	1.25691	3.81718e-39	2.02206e-37	up		TraesCS2A02G298600	0.481644	-1.05396	3.28929e-30	1.30653e-28	down
TraesCS2B02G482300	7.85297	2.97324	0.00564723	0.0226518	up		TraesCS2A02G298800	0.48522	-1.04329	4.39941e-12	6.59291e-11	down
TraesCS2B02G482700	2.84118	1.50649	1.30152e-06	1.09569e-05	up		TraesCS2A02G300300	0.0250613	-5.31839	0.000822173	0.0041545	down
TraesCS2B02G486100	2.1414	1.09855	4.7031e-18	1.06484e-16	up		TraesCS2A02G302300	0.300681	-1.7337	1.76131e-163	8.41158e-161	down
TraesCS2B02G494100	2.85163	1.51179	0.00522288	0.0211396	up		TraesCS2A02G305000	0.111182	-3.16901	8.92403e-07	7.66248e-06	down
TraesCS2B02G498100	9.38662	3.23061	5.63843e-34	2.51897e-32	up		TraesCS2A02G313000	0.435757	-1.19841	2.49593e-06	2.02351e-05	down
TraesCS2B02G503900	2.13967	1.09739	6.06798e-05	0.000391773	up		TraesCS2A02G313500	0.411902	-1.27963	4.48455e-14	7.82441e-13	down
TraesCS2B02G511300	26.3405	4.71921	8.60628e-15	1.57285e-13	up		TraesCS2A02G316800	0.0821868	-3.60495	0.0110811	0.0402852	down
TraesCS2B02G513600	2.31353	1.2101	0.00742481	0.0286856	up		TraesCS2A02G322500	0.143439	-2.80149	1.2435e-20	3.24886e-19	down
TraesCS2B02G513900	8.60469	3.10512	1.5231e-06	1.27043e-05	up		TraesCS2A02G324700	0.499242	-1.00219	3.08105e-09	3.56191e-08	down
TraesCS2B02G514800	3.3556	1.74657	2.65832e-10	3.4176e-09	up		TraesCS2A02G325100	0.125254	-2.99707	0.00315637	0.0136613	down
TraesCS2B02G515800	8.35644	3.06289	9.97079e-13	1.57789e-11	up		TraesCS2A02G325300	0.213965	-2.22455	3.6066e-07	3.25556e-06	down
TraesCS2B02G516300	3.83479	1.93915	0.00488912	0.0199803	up		TraesCS2A02G325800	0.0463223	-4.43215	7.5823e-94	1.39857e-91	down
TraesCS2B02G521500	34.3116	5.10062	0.00114173	0.00556959	up		TraesCS2A02G326100	0.195883	-2.35194	1.60334e-55	1.33483e-53	down
TraesCS2B02G521800	3.47248	1.79597	3.48615e-17	7.45734e-16	up		TraesCS2A02G329300	0.0402346	-4.63542	0.010647	0.0389243	down
TraesCS2B02G525600	9.55373	3.25606	5.45816e-05	0.000355343	up		TraesCS2A02G333600	0.290083	-1.78546	0.00597769	0.0237735	down
TraesCS2B02G533400	2.49907	1.32139	2.35179e-05	0.000163455	up		TraesCS2A02G337300	0.381901	-1.38873	6.68357e-59	6.12731e-57	down
TraesCS2B02G535400	3.16436	1.66191	8.23445e-08	8.05366e-07	up		TraesCS2A02G339100	0.0255376	-5.29123	5.61193e-06	4.31466e-05	down
TraesCS2B02G535500	5.99136	2.58288	2.85389e-11	3.98865e-10	up		TraesCS2A02G339200	0.482	-1.05289	1.49915e-05	0.000107506	down
TraesCS2B02G538600	11.347	3.50423	4.37378e-176	2.34309e-173	up		TraesCS2A02G342600	0.201836	-2.30874	1.45345e-103	3.14186e-101	down
TraesCS2B02G538700	10.6083	3.40712	4.2271e-92	7.61459e-90	up		TraesCS2A02G344600	0.325828	-1.61782	5.2355e-160	2.35433e-157	down
TraesCS2B02G538800	2.22138	1.15146	2.94011e-59	2.71561e-57	up		TraesCS2A02G348800	0.202768	-2.3021	7.6704e-10	9.41148e-09	down
TraesCS2B02G539100	3.24009	1.69603	1.39988e-17	3.06804e-16	up		TraesCS2A02G351300	0.277284	-1.85056	1.01893e-06	8.69197e-06	down
TraesCS2B02G545100	2.80621	1.48862	1.77034e-05	0.000125463	up		TraesCS2A02G355300	0.470635	-1.08732	0.0138592	0.0486899	down
TraesCS2B02G551700	6.6478	2.73288	0.00101326	0.00500753	up		TraesCS2A02G355900	0.478991	-1.06193	0.00885897	0.0333013	down
TraesCS2B02G554200	3.069	1.61777	0.0122278	0.0437746	up		TraesCS2A02G362800	0.328493	-1.60607	0.00708237	0.0275805	down
TraesCS2B02G556600	2.26272	1.17806	2.71217e-23	8.02924e-22	up		TraesCS2A02G366000	0.475809	-1.07155	4.78186e-05	0.000314841	down
TraesCS2B02G558400	5.88458	2.55694	0.000831616	0.00419533	up		TraesCS2A02G371200	0.0643139	-3.95873	0.00344389	0.0146971	down
TraesCS2B02G562100	2.36592	1.2424	0.000109328	0.000673404	up		TraesCS2A02G371400	0.0406413	-4.62091	2.63345e-33	1.15063e-31	down
TraesCS2B02G563400	8.10279	3.01842	0.000136299	0.000821543	up		TraesCS2A02G371600	0.0879237	-3.5076	1.5906e-92	2.90778e-90	down
TraesCS2B02G563700	2.67167	1.41774	4.94456e-10	6.17639e-09	up		TraesCS2A02G371700	0.212663	-2.23336	2.42275e-08	2.52296e-07	down
TraesCS2B02G563800	3.72587	1.89758	4.35511e-104	9.48075e-102	up		TraesCS2A02G375800	0.391683	-1.35224	0.00103454	0.00509959	down
TraesCS2B02G563900	31.3428	4.97006	0.00234917	0.0105018	up		TraesCS2A02G377500	0.0450332	-4.47287	1.62319e-05	0.000115767	down
TraesCS2B02G567800	2.63451	1.39753	1.24274e-06	1.04909e-05	up		TraesCS2A02G378100	0.0895813	-3.48066	4.78185e-07	4.24979e-06	down
TraesCS2B02G568500	3.97695	1.99166	0.00473151	0.0194225	up		TraesCS2A02G378700	0.36884	-1.43893	0.000500011	0.00266058	down
TraesCS2B02G568600	8.18263	3.03257	7.39387e-08	7.26382e-07	up		TraesCS2A02G384300	0.0124477	-6.32798	1.7523e-289	2.63302e-286	down
TraesCS2B02G571300	2.90106	1.53658	0.00454833	0.0187519	up		TraesCS2A02G385700	0.0330443	-4.91946	0.00450081	0.018587	down
TraesCS2B02G587800	6.20695	2.63388	0.00916373	0.0342567	up		TraesCS2A02G388500	0.107467	-3.21803	0.000801985	0.00406616	down
TraesCS2B02G591700	3.76468	1.91253	0.0139021	0.0488071	up		TraesCS2A02G393300	0.134803	-2.89108	0.00638704	0.0251847	down
TraesCS2B02G594100	2.30963	1.20766	9.17636e-06	6.82269e-05	up		TraesCS2A02G394800	0.436043	-1.19746	0.00546052	0.0219716	down
TraesCS2B02G602449	5.59007	2.48287	5.56243e-30	2.19248e-28	up		TraesCS2A02G396400	0.301976	-1.72749	2.30931e-31	9.45314e-30	down
TraesCS2B02G603500	2.75063	1.45976	4.3184e-09	4.90856e-08	up		TraesCS2A02G399600	0.181425	-2.46256	4.30364e-05	0.000285551	down
TraesCS2B02G608900	2.36771	1.24349	1.21448e-55	1.01797e-53	up		TraesCS2A02G399900	0.18275	-2.45205	1.61128e-126	4.68235e-124	down
TraesCS2B02G613900	8.44963	3.07889	1.17769e-09	1.41873e-08	up		TraesCS2A02G402900	0.455169	-1.13553	0.0122141	0.0437334	down
TraesCS2B02G627900	7.34878	2.8775	5.54752e-55	4.52072e-53	up		TraesCS2A02G404600	0.197246	-2.34193	1.30844e-33	5.78256e-32	down
TraesCS2D02G000200	2.12668	1.0886	0.000158046	0.000938478	up		TraesCS2A02G406900	0.208899	-2.25912	8.17586e-153	3.35793e-150	down
TraesCS2D02G000300	19.9598	4.31903	2.15944e-57	1.9142e-55	up		TraesCS2A02G409700	0.474409	-1.0758	9.20358e-06	6.8421e-05	down
TraesCS2D02G001300	2.25233	1.17142	4.8096e-10	6.01512e-09	up		TraesCS2A02G410400	0.404467	-1.30591	7.32147e-08	7.19729e-07	down
TraesCS2D02G003200	4.25396	2.08881	3.00716e-10	3.84521e-09	up		TraesCS2A02G412400	0.0820965	-3.60654	6.51976e-83	9.96681e-81	down
TraesCS2D02G005000	12.5071	3.64468	8.28892e-07	7.15104e-06	up		TraesCS2A02G415800	0.175797	-2.50802	0.00776722	0.0298048	down
TraesCS2D02G010100	6.05241	2.59751	0.00378502	0.015977	up		TraesCS2A02G415900	0.027011	-5.21031	0.00162619	0.00762152	down
TraesCS2D02G011700	2.71959	1.44339	1.46622e-07	1.38755e-06	up		TraesCS2A02G416400	0.396681	-1.33395	0.00202054	0.00920433	down
TraesCS2D02G013300	3.20812	1.68173	0.00116118	0.00565511	up		TraesCS2A02G417300	0.28163	-1.82813	1.66709e-63	1.67818e-61	down
TraesCS2D02G015700	10.5646	3.40117	4.81787e-08	4.84516e-07	up		TraesCS2A02G418300	0.224587	-2.15466	1.25937e-09	1.51122e-08	down
TraesCS2D02G016100	2.52533	1.33647	1.06183e-19	2.63563e-18	up		TraesCS2A02G422100	0.42745	-1.22617	0.010089	0.0371919	down
TraesCS2D02G019600	2.27216	1.18407	7.95142e-18	1.77487e-16	up		TraesCS2A02G424200	0.261715	-1.93393	6.82801e-06	5.17791e-05	down
TraesCS2D02G021900	6.98351	2.80395	8.26619e-05	0.000520977	up		TraesCS2A02G424600	0.217222	-2.20276	0.000585918	0.00306475	down
TraesCS2D02G022300	5.05369	2.33734	0.00167709	0.00782788	up		TraesCS2A02G427100	0.134845	-2.89063	1.66118e-67	1.7986e-65	down
TraesCS2D02G023000	31.319	4.96896	0.00191803	0.00880244	up		TraesCS2A02G427200	0.354712	-1.49528	0.00055736	0.0029318	down
TraesCS2D02G024400	2.06273	1.04455	0.000166949	0.000985834	up		TraesCS2A02G431000	0.495596	-1.01276	9.84905e-18	2.18656e-16	down
TraesCS2D02G024600	2.01287	1.00926	1.85048e-14	3.31018e-13	up		TraesCS2A02G437700	0.252646	-1.98481	1.76103e-36	8.61044e-35	down
TraesCS2D02G030100	2.06168	1.04382	0.00710189	0.0276338	up		TraesCS2A02G438200	0.167357	-2.579	5.74744e-72	6.82239e-70	down
TraesCS2D02G035700	2.71664	1.44182	9.47385e-10	1.15279e-08	up		TraesCS2A02G446600	0.0876314	-3.51241	0.000159009	0.000943656	down
TraesCS2D02G036900	2.66236	1.41271	9.75632e-05	0.000607187	up		TraesCS2A02G449900	0.0716711	-3.80247	4.92243e-34	2.20871e-32	down
TraesCS2D02G044100	30.7959	4.94467	3.5544e-23	1.04423e-21	up		TraesCS2A02G454400	0.153549	-2.70323	0.000187591	0.00109607	down
TraesCS2D02G047500	2.16769	1.11616	5.22743e-28	1.9056e-26	up		TraesCS2A02G459700	0.472356	-1.08205	0.00687132	0.026863	down
TraesCS2D02G050700	2.23756	1.16193	0.000163443	0.000967081	up		TraesCS2A02G463900	0.443663	-1.17246	2.21137e-79	3.08225e-77	down
TraesCS2D02G052800	3.13456	1.64826	1.40642e-06	1.17853e-05	up		TraesCS2A02G476000	0.462225	-1.11333	0.00204548	0.00930626	down
TraesCS2D02G052900	7.12982	2.83387	4.0321e-36	1.94067e-34	up		TraesCS2A02G480300	0.338817	-1.56142	1.13053e-09	1.3662e-08	down
TraesCS2D02G053300	4.35011	2.12105	1.53211e-47	1.03952e-45	up		TraesCS2A02G481100	0.225853	-2.14655	3.07026e-39	1.63342e-37	down
TraesCS2D02G057300	5.33509	2.41551	2.79505e-17	6.01447e-16	up		TraesCS2A02G482200	0.0138948	-6.16931	1.37314e-05	9.90803e-05	down
TraesCS2D02G057700	7.8232	2.96776	1.68224e-89	2.91118e-87	up		TraesCS2A02G482800	0.0295113	-5.08259	0.0021929	0.00989087	down
TraesCS2D02G063000	2.39529	1.2602	8.23225e-81	1.20181e-78	up		TraesCS2A02G483000	0.0399907	-4.64419	0.00253512	0.0112239	down
TraesCS2D02G067600	26.8666	4.74774	0.004211	0.0175265	up		TraesCS2A02G484000	0.0539189	-4.21306	0.00906118	0.033931	down
TraesCS2D02G071700	29.8673	4.90049	0.00252702	0.0111921	up		TraesCS2A02G487800	0.168119	-2.57244	5.0069e-05	0.000328358	down
TraesCS2D02G074300	2.1173	1.08223	3.9304e-05	0.000262767	up		TraesCS2A02G490100	0.311573	-1.68236	0.0071424	0.0277686	down
TraesCS2D02G088300	2.99644	1.58325	0.00509889	0.0207058	up		TraesCS2A02G491500	0.441939	-1.17808	4.33578e-15	8.09109e-14	down
TraesCS2D02G090600	25.3417	4.66344	0.00583817	0.0233024	up		TraesCS2A02G492500	0.227467	-2.13627	0.00518059	0.0209932	down
TraesCS2D02G093500	2.74569	1.45717	3.31631e-16	6.68327e-15	up		TraesCS2A02G499000	0.419694	-1.25259	9.39703e-11	1.25607e-09	down
TraesCS2D02G100300	2.37905	1.25039	1.64302e-07	1.54466e-06	up		TraesCS2A02G501200	0.487084	-1.03776	5.10694e-17	1.08229e-15	down
TraesCS2D02G100700	4.52323	2.17735	4.16848e-52	3.15877e-50	up		TraesCS2A02G505300	0.322981	-1.63048	0.00902321	0.0338073	down
TraesCS2D02G100900	2.32109	1.21481	4.06825e-47	2.72427e-45	up		TraesCS2A02G505500	0.305443	-1.71103	1.02688e-43	6.25745e-42	down
TraesCS2D02G101300	3.35163	1.74486	3.32027e-09	3.82483e-08	up		TraesCS2A02G513100	0.0299911	-5.05932	5.72752e-11	7.81345e-10	down
TraesCS2D02G101400	4.94211	2.30513	3.16372e-83	4.89716e-81	up		TraesCS2A02G513200	0.0583372	-4.09944	1.58962e-100	3.24276e-98	down
TraesCS2D02G104500	2.25803	1.17507	4.36223e-19	1.04407e-17	up		TraesCS2A02G517200	0.0151798	-6.0417	5.89719e-05	0.000381626	down
TraesCS2D02G104600	2.12	1.08406	4.38284e-06	3.42787e-05	up		TraesCS2A02G517900	0.414949	-1.26899	8.03974e-41	4.49052e-39	down
TraesCS2D02G104700	9.06854	3.18087	4.38583e-06	3.42969e-05	up		TraesCS2A02G520800	0.440748	-1.18197	0.00158722	0.007457	down
TraesCS2D02G106800	2.08231	1.05819	2.90833e-31	1.18736e-29	up		TraesCS2A02G534300	0.312724	-1.67704	0.00209122	0.00948354	down
TraesCS2D02G110700	4.71655	2.23773	1.3927e-05	0.000100398	up		TraesCS2A02G538500	0.426443	-1.22957	0.00430492	0.0178619	down
TraesCS2D02G111400	2.33898	1.22588	1.86846e-16	3.82681e-15	up		TraesCS2A02G539100	0.442951	-1.17478	9.82359e-23	2.84266e-21	down
TraesCS2D02G114100	2.5014	1.32274	0.00885746	0.0332976	up		TraesCS2A02G539400	0.239555	-2.06157	9.47436e-19	2.23122e-17	down
TraesCS2D02G114200	2.53603	1.34257	1.72671e-16	3.54355e-15	up		TraesCS2A02G541400	0.452477	-1.14408	4.44452e-42	2.60775e-40	down
TraesCS2D02G114800	2.70701	1.4367	5.52045e-09	6.19712e-08	up		TraesCS2A02G541900	0.122395	-3.03038	2.54744e-07	2.34169e-06	down
TraesCS2D02G122900	3.65091	1.86826	0.011555	0.0417402	up		TraesCS2A02G542700	0.481485	-1.05444	2.24842e-22	6.404e-21	down
TraesCS2D02G129000	6.61462	2.72566	0.00182637	0.00843645	up		TraesCS2A02G543900	0.476587	-1.06919	1.52777e-23	4.58459e-22	down
TraesCS2D02G131500	3.04987	1.60875	0.000799905	0.00405695	up		TraesCS2A02G547800	0.346487	-1.52913	0.00174055	0.00808612	down
TraesCS2D02G132500	2.68448	1.42464	0.00205164	0.00933158	up		TraesCS2A02G548000	0.349996	-1.51459	2.76793e-28	1.01988e-26	down
TraesCS2D02G135800	2.23798	1.1622	0.000228615	0.00131016	up		TraesCS2A02G551100	0.19967	-2.32431	4.74006e-44	2.92313e-42	down
TraesCS2D02G137300	2.69431	1.42992	0.00071478	0.00367023	up		TraesCS2A02G553900	0.0394546	-4.66366	0.00981909	0.0363449	down
TraesCS2D02G138900	4.19596	2.069	6.06569e-08	6.02627e-07	up		TraesCS2A02G555300	0.32235	-1.6333	3.40389e-07	3.08524e-06	down
TraesCS2D02G139100	326.674	8.35171	5.57799e-99	1.0979e-96	up		TraesCS2A02G572200	0.0352012	-4.82823	0.00613899	0.0243312	down
TraesCS2D02G140700	2.04428	1.03159	9.88577e-12	1.43741e-10	up		TraesCS2A02G574800	0.435081	-1.20064	1.14661e-09	1.38454e-08	down
TraesCS2D02G145100	4.51637	2.17516	0.00222294	0.0100079	up		TraesCS2A02G578400	0.0406584	-4.6203	1.18828e-36	5.84251e-35	down
TraesCS2D02G155300	2.38211	1.25224	0.00646331	0.0254448	up		TraesCS2B02G002800	0.0183587	-5.76739	0.000107668	0.000663922	down
TraesCS2D02G163300	2.10476	1.07366	2.91851e-09	3.38416e-08	up		TraesCS2B02G003100	0.0297014	-5.07333	0.00250197	0.0110955	down
TraesCS2D02G165100	5.36689	2.42409	0.00611878	0.024259	up		TraesCS2B02G010100	0.407912	-1.29367	0.000117452	0.000719058	down
TraesCS2D02G168200	4.58044	2.19548	0.000540655	0.00285392	up		TraesCS2B02G017900	0.108705	-3.20151	8.0029e-05	0.000505832	down
TraesCS2D02G169200	4.92593	2.3004	0.000222012	0.00127612	up		TraesCS2B02G039900	0.18231	-2.45553	0.000505506	0.00268611	down
TraesCS2D02G173600	2.93159	1.55169	0.000131835	0.000796816	up		TraesCS2B02G040000	0.283212	-1.82004	8.32163e-44	5.08098e-42	down
TraesCS2D02G175100	2.26008	1.17637	0.00263974	0.011637	up		TraesCS2B02G040100	0.239497	-2.06192	0.00813055	0.0309886	down
TraesCS2D02G176100	7.69098	2.94317	0.012558	0.0448111	up		TraesCS2B02G040500	0.417546	-1.25999	8.32234e-06	6.23209e-05	down
TraesCS2D02G177200	2.18965	1.1307	0.000104328	0.000645083	up		TraesCS2B02G042800	0.0595987	-4.06858	0.00187002	0.00861225	down
TraesCS2D02G180500	4.32493	2.11268	0.00326974	0.0140571	up		TraesCS2B02G042900	0.111656	-3.16286	0.00328933	0.0141315	down
TraesCS2D02G190600	2.21241	1.14562	6.8955e-13	1.10197e-11	up		TraesCS2B02G043200	0.245775	-2.02459	0.0016912	0.00788183	down
TraesCS2D02G192100	2.06606	1.04688	2.39792e-05	0.000166286	up		TraesCS2B02G043800	0.341166	-1.55145	0.000106288	0.000656189	down
TraesCS2D02G197600	4.08381	2.02992	1.47432e-13	2.47692e-12	up		TraesCS2B02G044400	0.49119	-1.02565	3.25847e-20	8.31241e-19	down
TraesCS2D02G201200	6.18913	2.62974	9.51257e-12	1.38642e-10	up		TraesCS2B02G044600	0.352462	-1.50446	0.00157835	0.00742213	down
TraesCS2D02G209600	89.6428	6.48612	1.28462e-06	1.08265e-05	up		TraesCS2B02G051600	0.203557	-2.29649	0.014177	0.0496138	down
TraesCS2D02G211100	6.17021	2.62532	4.31249e-21	1.15513e-19	up		TraesCS2B02G068800	0.019596	-5.67329	0.000247702	0.00140894	down
TraesCS2D02G213200	4.7802	2.25707	0.0106367	0.0388898	up		TraesCS2B02G069400	0.168629	-2.56807	0.0033692	0.0144334	down
TraesCS2D02G216700	2.01102	1.00793	1.37781e-17	3.02181e-16	up		TraesCS2B02G073600	0.00943969	-6.72705	6.3613e-07	5.56756e-06	down
TraesCS2D02G217200	307.186	8.26297	2.33548e-11	3.29325e-10	up		TraesCS2B02G078900	0.176586	-2.50156	6.00074e-25	1.9135e-23	down
TraesCS2D02G222100	18.5036	4.20973	3.5725e-05	0.000240327	up		TraesCS2B02G079100	0.159271	-2.65045	1.34198e-235	1.19819e-232	down
TraesCS2D02G223500	3.14339	1.65232	0.000433912	0.00234574	up		TraesCS2B02G079200	0.276576	-1.85425	8.15935e-150	3.16147e-147	down
TraesCS2D02G224100	2.21367	1.14644	0.000188948	0.00110264	up		TraesCS2B02G079300	0.22808	-2.13239	1.07676e-104	2.38617e-102	down
TraesCS2D02G230600	2.04767	1.03398	0.00476941	0.019556	up		TraesCS2B02G079400	0.244129	-2.03429	7.96939e-80	1.12867e-77	down
TraesCS2D02G251700	5.92054	2.56573	5.18519e-08	5.19252e-07	up		TraesCS2B02G079500	0.212422	-2.23499	9.74801e-117	2.54469e-114	down
TraesCS2D02G252000	3.05165	1.60959	0.000119805	0.000731279	up		TraesCS2B02G079700	0.303003	-1.7226	7.61007e-05	0.000482537	down
TraesCS2D02G261100	3.84996	1.94485	2.04117e-17	4.4325e-16	up		TraesCS2B02G079900	0.48152	-1.05433	8.17181e-05	0.000515503	down
TraesCS2D02G262100	8.48352	3.08466	9.10438e-08	8.87069e-07	up		TraesCS2B02G082800	0.135389	-2.88481	0.00180773	0.00836417	down
TraesCS2D02G266500	2.85598	1.51398	4.66539e-07	4.14928e-06	up		TraesCS2B02G102900	0.162594	-2.62065	2.91976e-07	2.66603e-06	down
TraesCS2D02G267400	2.83106	1.50134	2.75517e-05	0.000189292	up		TraesCS2B02G103600	0.409817	-1.28695	0.00207016	0.00940187	down
TraesCS2D02G271500	3.07833	1.62215	9.405e-06	6.97501e-05	up		TraesCS2B02G105300	0.473468	-1.07866	4.14293e-13	6.73973e-12	down
TraesCS2D02G278800	2.04347	1.03102	0.00023382	0.00133614	up		TraesCS2B02G106400	0.201925	-2.30811	3.19001e-28	1.1705e-26	down
TraesCS2D02G278900	2.47417	1.30694	1.80354e-06	1.49021e-05	up		TraesCS2B02G106600	0.0260696	-5.26149	9.3835e-06	6.96377e-05	down
TraesCS2D02G283400	2.04266	1.03045	4.74977e-14	8.27543e-13	up		TraesCS2B02G108200	0.429239	-1.22015	9.83169e-06	7.26347e-05	down
TraesCS2D02G284100	2.16203	1.11239	1.16102e-14	2.10435e-13	up		TraesCS2B02G109700	0.431592	-1.21226	0.000380923	0.00208674	down
TraesCS2D02G286300	12.3427	3.62558	9.3152e-09	1.01951e-07	up		TraesCS2B02G110500	0.372621	-1.42422	0.00449179	0.0185523	down
TraesCS2D02G287300	3.06288	1.61489	2.03429e-99	4.09563e-97	up		TraesCS2B02G110600	0.0419798	-4.57416	1.44287e-10	1.90181e-09	down
TraesCS2D02G289300	5.02277	2.32848	1.02254e-05	7.53358e-05	up		TraesCS2B02G111100	0.42719	-1.22705	7.85937e-22	2.1929e-20	down
TraesCS2D02G292300	2.58291	1.369	9.47028e-11	1.26531e-09	up		TraesCS2B02G118800	0.413102	-1.27543	1.86372e-70	2.14214e-68	down
TraesCS2D02G301500	2.13861	1.09668	1.10182e-05	8.06938e-05	up		TraesCS2B02G120800	0.498657	-1.00388	8.81138e-14	1.50915e-12	down
TraesCS2D02G304300	2.8496	1.51076	2.0753e-05	0.000145403	up		TraesCS2B02G121500	0.345427	-1.53355	8.55183e-15	1.56336e-13	down
TraesCS2D02G308700	2.9519	1.56164	0.00960343	0.0356645	up		TraesCS2B02G121600	0.194979	-2.35861	4.46162e-81	6.56007e-79	down
TraesCS2D02G309700	2.94188	1.55674	0.000147112	0.000880686	up		TraesCS2B02G127100	0.0525226	-4.25092	4.59147e-06	3.57652e-05	down
TraesCS2D02G311900	2.93384	1.55279	1.78362e-12	2.76367e-11	up		TraesCS2B02G131400	0.453779	-1.13994	2.23344e-09	2.61788e-08	down
TraesCS2D02G316300	6.49458	2.69924	9.65238e-18	2.14599e-16	up		TraesCS2B02G132100	0.01827	-5.77438	3.85698e-21	1.03808e-19	down
TraesCS2D02G316500	4.84992	2.27796	4.07555e-05	0.000271646	up		TraesCS2B02G132500	0.0103613	-6.59265	2.25889e-07	2.09049e-06	down
TraesCS2D02G318100	2.08394	1.05932	0.00174769	0.00811683	up		TraesCS2B02G132700	0.105949	-3.23856	1.53132e-06	1.27693e-05	down
TraesCS2D02G318500	2.43537	1.28414	0.0111486	0.0404996	up		TraesCS2B02G133700	0.0633759	-3.97992	5.68715e-16	1.13168e-14	down
TraesCS2D02G323300	2.07517	1.05323	1.09744e-07	1.05789e-06	up		TraesCS2B02G135600	0.0481074	-4.3776	4.11976e-10	5.17654e-09	down
TraesCS2D02G324700	11.3043	3.4988	3.30491e-54	2.64767e-52	up		TraesCS2B02G141300	0.0414849	-4.59127	0.000216802	0.00124804	down
TraesCS2D02G326300	2.21958	1.15029	0.000322429	0.00179229	up		TraesCS2B02G162100	0.453632	-1.14041	0.00959158	0.0356334	down
TraesCS2D02G328900	2.00913	1.00657	3.0203e-10	3.86041e-09	up		TraesCS2B02G163300	0.49361	-1.01856	5.20377e-05	0.000340364	down
TraesCS2D02G332000	2.37385	1.24723	2.06579e-11	2.92233e-10	up		TraesCS2B02G168300	0.421896	-1.24504	2.74599e-16	5.56487e-15	down
TraesCS2D02G332100	2.03631	1.02596	3.15082e-05	0.000214229	up		TraesCS2B02G168400	0.299768	-1.73808	7.20288e-09	7.98108e-08	down
TraesCS2D02G336400	3.36834	1.75204	0.000291105	0.00163247	up		TraesCS2B02G170800	0.0101214	-6.62645	1.1544e-06	9.77312e-06	down
TraesCS2D02G358500	2.04279	1.03054	0.0005128	0.00272087	up		TraesCS2B02G171400	0.439515	-1.18601	1.68638e-06	1.39904e-05	down
TraesCS2D02G361900	2.69066	1.42796	6.4699e-07	5.65377e-06	up		TraesCS2B02G172300	0.0391752	-4.67392	0.00180846	0.00836691	down
TraesCS2D02G363900	2.39254	1.25854	0.0037906	0.0159961	up		TraesCS2B02G174500	0.219563	-2.18729	2.65377e-32	1.12442e-30	down
TraesCS2D02G364500	41.6719	5.381	1.06515e-13	1.80922e-12	up		TraesCS2B02G177300	0.221611	-2.1739	2.88295e-209	1.99562e-206	down
TraesCS2D02G364600	6.63685	2.7305	2.81398e-70	3.22832e-68	up		TraesCS2B02G177500	0.248734	-2.00732	4.71578e-156	2.01753e-153	down
TraesCS2D02G367400	2.30444	1.20442	8.27954e-05	0.000521605	up		TraesCS2B02G177600	0.0600719	-4.05717	1.30956e-233	1.12053e-230	down
TraesCS2D02G368300	2.04227	1.03017	2.13438e-09	2.50797e-08	up		TraesCS2B02G180000	0.131377	-2.92821	3.70056e-37	1.84749e-35	down
TraesCS2D02G373400	2.06181	1.04391	0.00228331	0.010246	up		TraesCS2B02G181600	0.372884	-1.4232	3.12056e-71	3.62733e-69	down
TraesCS2D02G375000	2.3142	1.21051	0.000194803	0.00113422	up		TraesCS2B02G183100	0.484012	-1.04689	3.85265e-07	3.46699e-06	down
TraesCS2D02G375200	2.32256	1.21571	7.25085e-06	5.47497e-05	up		TraesCS2B02G187700	0.377254	-1.40639	1.04484e-12	1.65008e-11	down
TraesCS2D02G382600	2.70437	1.43529	8.07171e-09	8.90852e-08	up		TraesCS2B02G191500	0.354533	-1.49601	0.000151482	0.00090395	down
TraesCS2D02G383100	2.1181	1.08277	8.6321e-06	6.4476e-05	up		TraesCS2B02G192700	0.200294	-2.31981	2.95354e-35	1.37224e-33	down
TraesCS2D02G386700	46.1631	5.52867	0.000210415	0.00121665	up		TraesCS2B02G194200	0.247874	-2.01232	0.00331467	0.0142285	down
TraesCS2D02G387300	2.29565	1.1989	6.58284e-27	2.30951e-25	up		TraesCS2B02G194700	0.461167	-1.11664	2.95707e-21	8.02891e-20	down
TraesCS2D02G387400	2.18774	1.12944	0.0106168	0.038824	up		TraesCS2B02G195900	0.311053	-1.68477	4.11735e-36	1.98015e-34	down
TraesCS2D02G388000	2.80616	1.4886	0.00176108	0.00817472	up		TraesCS2B02G200100	0.43742	-1.19291	7.39462e-09	8.1847e-08	down
TraesCS2D02G391800	2.96797	1.56948	1.15158e-46	7.604e-45	up		TraesCS2B02G204500	0.401963	-1.31487	3.64631e-35	1.68521e-33	down
TraesCS2D02G392800	2.88284	1.52749	9.7622e-30	3.82826e-28	up		TraesCS2B02G209700	0.463731	-1.10864	1.23009e-16	2.5473e-15	down
TraesCS2D02G393400	2.59294	1.37459	0.00217877	0.00983466	up		TraesCS2B02G212400	0.00286831	-8.44558	5.86843e-16	1.16625e-14	down
TraesCS2D02G394800	2.04334	1.03093	1.12184e-19	2.77564e-18	up		TraesCS2B02G212700	0.390528	-1.3565	0.000725339	0.00371887	down
TraesCS2D02G396700	3.08737	1.62638	1.59708e-104	3.51398e-102	up		TraesCS2B02G215000	0.154153	-2.69756	1.0526e-13	1.78939e-12	down
TraesCS2D02G402900	2.63889	1.39993	0.000484737	0.00258825	up		TraesCS2B02G218100	0.429315	-1.21989	7.26014e-09	8.04018e-08	down
TraesCS2D02G405200	2.35046	1.23294	5.98674e-06	4.58225e-05	up		TraesCS2B02G218600	0.322259	-1.63371	1.37519e-121	3.7822e-119	down
TraesCS2D02G406200	4.5581	2.18843	0.001682	0.00784785	up		TraesCS2B02G220100	0.23106	-2.11366	4.90194e-28	1.788e-26	down
TraesCS2D02G406700	6.55825	2.71331	0.0114971	0.0415646	up		TraesCS2B02G221500	0.216381	-2.20835	0.00708615	0.0275882	down
TraesCS2D02G406900	34.3788	5.10345	0.00111855	0.00547127	up		TraesCS2B02G223100	0.373391	-1.42124	3.70373e-09	4.24039e-08	down
TraesCS2D02G409800	2.36817	1.24377	0.00229484	0.010291	up		TraesCS2B02G224000	0.429088	-1.22065	0.000117953	0.000721691	down
TraesCS2D02G417100	2.09906	1.06974	4.53723e-06	3.53874e-05	up		TraesCS2B02G224300	0.17292	-2.53183	3.20509e-143	1.17533e-140	down
TraesCS2D02G418100	3.74461	1.90481	0.00153488	0.00724925	up		TraesCS2B02G226600	0.469933	-1.08947	1.35806e-07	1.29034e-06	down
TraesCS2D02G419000	2.04006	1.02861	2.3421e-12	3.58307e-11	up		TraesCS2B02G229900	0.479648	-1.05995	0.00101838	0.00502923	down
TraesCS2D02G420500	2.63505	1.39783	0.008291	0.0315046	up		TraesCS2B02G230800	0.254242	-1.97573	0.0108507	0.039569	down
TraesCS2D02G424300	2.4657	1.302	4.82329e-07	4.28476e-06	up		TraesCS2B02G231500	0.272071	-1.87795	3.11649e-45	1.98345e-43	down
TraesCS2D02G427500	2.88916	1.53065	2.76292e-09	3.21101e-08	up		TraesCS2B02G232400	0.241577	-2.04944	4.70928e-23	1.3737e-21	down
TraesCS2D02G428400	5.25567	2.39388	3.18451e-05	0.000216281	up		TraesCS2B02G232500	0.0532926	-4.22992	1.11388e-10	1.48181e-09	down
TraesCS2D02G429900	2.05686	1.04044	6.94326e-13	1.10903e-11	up		TraesCS2B02G233000	0.2519	-1.98908	1.03319e-13	1.75834e-12	down
TraesCS2D02G431500	14.7315	3.88084	1.23968e-99	2.50402e-97	up		TraesCS2B02G233400	0.349304	-1.51745	4.60061e-67	4.92066e-65	down
TraesCS2D02G431600	3.30066	1.72276	2.68403e-07	2.46138e-06	up		TraesCS2B02G233600	0.385778	-1.37416	1.2361e-07	1.18249e-06	down
TraesCS2D02G432700	4.24502	2.08577	3.6721e-05	0.000246596	up		TraesCS2B02G239200	0.422976	-1.24135	7.95549e-17	1.66705e-15	down
TraesCS2D02G432800	2.00617	1.00444	1.58098e-23	4.73919e-22	up		TraesCS2B02G239400	0.265648	-1.91241	1.7324e-176	9.3621e-174	down
TraesCS2D02G442600	3.77251	1.91552	1.19907e-05	8.72975e-05	up		TraesCS2B02G240000	0.482997	-1.04991	1.83519e-38	9.51686e-37	down
TraesCS2D02G442700	6.01937	2.58961	2.45952e-26	8.41329e-25	up		TraesCS2B02G245800	0.315412	-1.66469	0.00453842	0.0187135	down
TraesCS2D02G450000	2.00661	1.00476	0.000275421	0.00155213	up		TraesCS2B02G246100	0.141458	-2.82156	1.70406e-52	1.30089e-50	down
TraesCS2D02G451100	2.0568	1.0404	3.45346e-19	8.33036e-18	up		TraesCS2B02G248400	0.452065	-1.1454	2.29063e-07	2.1189e-06	down
TraesCS2D02G452100	2.09267	1.06534	2.20943e-08	2.30902e-07	up		TraesCS2B02G250700	0.271562	-1.88064	0.00999034	0.0368702	down
TraesCS2D02G452200	10.4015	3.37872	0.0134735	0.047511	up		TraesCS2B02G260500	0.487438	-1.03671	0.00124938	0.00604781	down
TraesCS2D02G453200	3.16839	1.66375	2.96194e-05	0.000202324	up		TraesCS2B02G266000	0.251198	-1.99311	4.41977e-09	5.01637e-08	down
TraesCS2D02G453300	5.0171	2.32685	0.0028538	0.0124886	up		TraesCS2B02G270300	0.403288	-1.31012	1.33538e-69	1.50125e-67	down
TraesCS2D02G453600	10.4969	3.39189	3.60843e-29	1.37992e-27	up		TraesCS2B02G272300	0.409761	-1.28715	2.12874e-43	1.28826e-41	down
TraesCS2D02G453700	4.52913	2.17923	2.8877e-18	6.63568e-17	up		TraesCS2B02G275100	0.0800529	-3.6429	0	0	down
TraesCS2D02G453800	6.67733	2.73927	1.09413e-22	3.15867e-21	up		TraesCS2B02G275500	0.225185	-2.15082	6.50453e-22	1.82313e-20	down
TraesCS2D02G457400	6.50337	2.70119	0.00505924	0.0205692	up		TraesCS2B02G276000	0.153444	-2.70422	0.00564657	0.0226506	down
TraesCS2D02G458700	32.9614	5.0427	0.00177922	0.00824897	up		TraesCS2B02G276200	0.429828	-1.21817	1.92759e-05	0.000135826	down
TraesCS2D02G468600	8.31227	3.05524	6.08564e-41	3.41145e-39	up		TraesCS2B02G277300	0.247054	-2.0171	9.57728e-18	2.13006e-16	down
TraesCS2D02G477300	65.8328	6.04074	2.93387e-08	3.02051e-07	up		TraesCS2B02G282000	0.230678	-2.11605	5.45288e-05	0.000355112	down
TraesCS2D02G478000	2.00046	1.00033	0.000168362	0.00099332	up		TraesCS2B02G284400	0.486785	-1.03864	5.28915e-05	0.000345325	down
TraesCS2D02G480100	50.7407	5.66507	0.000100513	0.000623598	up		TraesCS2B02G288300	0.0242161	-5.36789	3.45424e-08	3.52385e-07	down
TraesCS2D02G483300	2.27183	1.18386	0.000486048	0.00259457	up		TraesCS2B02G290100	0.436871	-1.19472	1.90722e-07	1.7819e-06	down
TraesCS2D02G485400	28.2577	4.82057	0.00390004	0.0163884	up		TraesCS2B02G291400	0.460153	-1.11981	0.00936896	0.0349201	down
TraesCS2D02G486300	2.69001	1.42761	7.58816e-05	0.000481297	up		TraesCS2B02G292500	0.368206	-1.44142	1.10982e-13	1.8825e-12	down
TraesCS2D02G486800	2.21194	1.14531	0.00262768	0.0115896	up		TraesCS2B02G299000	0.481334	-1.05489	0.000117074	0.000717098	down
TraesCS2D02G487700	2.18962	1.13068	2.88477e-05	0.000197513	up		TraesCS2B02G311300	0.461822	-1.11459	0.00215174	0.00972864	down
TraesCS2D02G488500	5.65649	2.49991	0.0108953	0.0397011	up		TraesCS2B02G312600	0.264329	-1.9196	1.43091e-81	2.12933e-79	down
TraesCS2D02G489200	2.23918	1.16297	1.41353e-29	5.50115e-28	up		TraesCS2B02G315300	0.434942	-1.20111	2.71737e-14	4.80784e-13	down
TraesCS2D02G493400	49.2401	5.62176	0.000121291	0.000739107	up		TraesCS2B02G317500	0.319328	-1.64689	1.11037e-30	4.47981e-29	down
TraesCS2D02G498300	2.02145	1.01539	0.0108013	0.0394192	up		TraesCS2B02G318100	0.279643	-1.83834	5.51746e-153	2.2813e-150	down
TraesCS2D02G504800	3.31645	1.72964	0.00882193	0.0331803	up		TraesCS2B02G322500	0.332075	-1.59042	1.35052e-06	1.13446e-05	down
TraesCS2D02G505400	3.42398	1.77568	0.00370475	0.0156757	up		TraesCS2B02G325700	0.0219254	-5.51126	0.00075873	0.00387069	down
TraesCS2D02G507800	13.3215	3.73568	2.86056e-80	4.10794e-78	up		TraesCS2B02G329600	0.376969	-1.40748	1.46142e-44	9.10352e-43	down
TraesCS2D02G507900	31.3122	4.96865	2.49198e-17	5.38112e-16	up		TraesCS2B02G332300	0.392083	-1.35077	9.96166e-30	3.89903e-28	down
TraesCS2D02G509100	2.8731	1.52261	0.00639776	0.0252205	up		TraesCS2B02G333900	0.492176	-1.02275	1.15929e-21	3.21425e-20	down
TraesCS2D02G511800	5.20675	2.38038	6.07303e-72	7.19503e-70	up		TraesCS2B02G335000	0.3546	-1.49573	5.69358e-24	1.75032e-22	down
TraesCS2D02G511900	14.9193	3.89911	0.000414626	0.00225116	up		TraesCS2B02G336600	0.0317382	-4.97764	0.00323074	0.0139274	down
TraesCS2D02G512000	9.75409	3.28601	1.42676e-50	1.03899e-48	up		TraesCS2B02G336700	0.0252066	-5.31005	0.00134377	0.00645601	down
TraesCS2D02G512100	6.80126	2.7658	1.16221e-157	5.11431e-155	up		TraesCS2B02G340300	0.234254	-2.09385	8.56507e-115	2.20782e-112	down
TraesCS2D02G512400	2.20114	1.13825	1.61042e-13	2.70042e-12	up		TraesCS2B02G342200	0.302363	-1.72564	1.81752e-213	1.302e-210	down
TraesCS2D02G526900	17.4772	4.12741	0.000114812	0.000704784	up		TraesCS2B02G344600	0.419964	-1.25166	1.74886e-45	1.12348e-43	down
TraesCS2D02G527700	3.49295	1.80445	0.00112594	0.00550303	up		TraesCS2B02G345000	0.426218	-1.23034	0.012351	0.0441594	down
TraesCS2D02G529000	2.02644	1.01894	1.69852e-15	3.2578e-14	up		TraesCS2B02G347400	0.268189	-1.89868	0.00668124	0.0261939	down
TraesCS2D02G530600	4.90948	2.29557	6.33327e-05	0.000407747	up		TraesCS2B02G354000	0.454024	-1.13916	0.00643533	0.0253492	down
TraesCS2D02G533500	15.3499	3.94016	0.0126524	0.045089	up		TraesCS2B02G354800	0.104394	-3.25988	0.000259447	0.00147017	down
TraesCS2D02G536900	4.04881	2.0175	0.000958586	0.00476409	up		TraesCS2B02G355900	0.321099	-1.63891	2.93481e-72	3.53134e-70	down
TraesCS2D02G537700	2.9625	1.56682	2.227e-08	2.3262e-07	up		TraesCS2B02G367200	0.187693	-2.41356	2.14447e-41	1.22966e-39	down
TraesCS2D02G547200	23.0742	4.52821	0.00224747	0.0101021	up		TraesCS2B02G369600	0.495625	-1.01268	6.84948e-39	3.61281e-37	down
TraesCS2D02G548600	2.42305	1.27682	3.99253e-06	3.14095e-05	up		TraesCS2B02G370900	0.356902	-1.4864	0.00565558	0.0226779	down
TraesCS2D02G573500	2.60208	1.37967	0.00243351	0.010834	up		TraesCS2B02G372200	0.0256092	-5.2872	0.00120225	0.00583848	down
TraesCS2D02G573600	4.43449	2.14877	1.92371e-06	1.58209e-05	up		TraesCS2B02G374600	0.284455	-1.81373	9.0271e-08	8.79818e-07	down
TraesCS2D02G585700	13.8035	3.78696	1.3161e-23	3.9629e-22	up		TraesCS2B02G374700	0.322002	-1.63486	1.4917e-56	1.29435e-54	down
TraesCS2D02G588200	9.58591	3.26091	1.66251e-53	1.3131e-51	up		TraesCS2B02G376700	0.181301	-2.46354	5.09849e-06	3.94602e-05	down
TraesCS2D02G589200	6.32962	2.66212	0.00635825	0.0250905	up		TraesCS2B02G376800	0.435304	-1.1999	9.16473e-19	2.16243e-17	down
TraesCS2D02G591000	2.43135	1.28176	1.27435e-07	1.217e-06	up		TraesCS2B02G381200	0.48402	-1.04686	9.17824e-05	0.000574346	down
TraesCS2D02G594500	16.9967	4.08718	0.00147327	0.00699635	up		TraesCS2B02G381600	0.449862	-1.15245	1.14525e-53	9.08047e-52	down
TraesCS2D02G595500	7.09753	2.82732	3.76175e-14	6.60069e-13	up		TraesCS2B02G388600	0.0282168	-5.1473	1.48948e-09	1.77662e-08	down
TraesCS2D02G599700	3.21922	1.68671	4.33703e-07	3.87485e-06	up		TraesCS2B02G388800	0.350968	-1.51059	0.000954897	0.00474767	down
TraesCS2D02G601500	2.45198	1.29395	3.92578e-08	3.9805e-07	up		TraesCS2B02G389500	0.480838	-1.05638	3.029e-07	2.76047e-06	down
TraesCS3A02G000600	2.58432	1.36978	0.000130824	0.000791252	up		TraesCS2B02G389600	0.438968	-1.18781	1.32746e-07	1.26322e-06	down
TraesCS3A02G011800	6.97999	2.80323	0.00420275	0.017498	up		TraesCS2B02G390700	0.388117	-1.36544	8.66945e-14	1.48608e-12	down
TraesCS3A02G013200	8.74526	3.1285	0.0039207	0.0164673	up		TraesCS2B02G390900	0.311941	-1.68066	0.00180986	0.00837213	down
TraesCS3A02G014900	32.8476	5.03772	0.000381854	0.0020911	up		TraesCS2B02G391400	0.197288	-2.34162	0.00818026	0.0311491	down
TraesCS3A02G015600	15.5045	3.95461	7.90444e-25	2.50886e-23	up		TraesCS2B02G392700	0.326653	-1.61417	1.04269e-15	2.03411e-14	down
TraesCS3A02G016700	2.16489	1.11429	4.08972e-05	0.000272502	up		TraesCS2B02G394400	0.389238	-1.36128	5.52277e-29	2.08993e-27	down
TraesCS3A02G017100	2.57447	1.36428	1.03842e-36	5.11794e-35	up		TraesCS2B02G395000	0.158494	-2.6575	1.98855e-111	4.92003e-109	down
TraesCS3A02G017200	3.70185	1.88825	6.05025e-12	8.97731e-11	up		TraesCS2B02G400500	0.215561	-2.21383	1.85899e-13	3.10287e-12	down
TraesCS3A02G017900	4.47547	2.16204	1.42254e-47	9.67312e-46	up		TraesCS2B02G401500	0.0287349	-5.12105	1.42338e-207	9.74334e-205	down
TraesCS3A02G019900	6.03525	2.59341	1.45628e-05	0.000104682	up		TraesCS2B02G402900	0.488999	-1.0321	0.00731704	0.0283332	down
TraesCS3A02G023100	2.19777	1.13604	0.000418728	0.0022711	up		TraesCS2B02G406600	0.0374472	-4.739	3.74534e-08	3.80569e-07	down
TraesCS3A02G023400	3.08959	1.62742	3.67186e-12	5.54306e-11	up		TraesCS2B02G410700	0.0974912	-3.35858	0.00586812	0.0234052	down
TraesCS3A02G025300	14.164	3.82416	7.99596e-08	7.83035e-07	up		TraesCS2B02G411300	0.0414513	-4.59244	0.0137598	0.0483903	down
TraesCS3A02G034300	2.3372	1.22478	0.00062062	0.00322981	up		TraesCS2B02G411400	0.385092	-1.37672	0.000853533	0.00429394	down
TraesCS3A02G043400	3.31516	1.72908	1.19614e-06	1.01085e-05	up		TraesCS2B02G414800	0.155886	-2.68144	7.07055e-84	1.10838e-81	down
TraesCS3A02G044700	10.9342	3.45078	4.1582e-07	3.72455e-06	up		TraesCS2B02G417700	0.313922	-1.67152	0.00287807	0.0125858	down
TraesCS3A02G044800	2.11847	1.08302	9.99838e-15	1.81756e-13	up		TraesCS2B02G417900	0.139675	-2.83985	5.48837e-172	2.70498e-169	down
TraesCS3A02G048700	2.10987	1.07715	1.23108e-14	2.22676e-13	up		TraesCS2B02G419900	0.366578	-1.44781	2.87225e-06	2.30735e-05	down
TraesCS3A02G049500	2.62748	1.39368	1.53793e-15	2.96177e-14	up		TraesCS2B02G422500	0.0654444	-3.93359	1.2985e-37	6.56247e-36	down
TraesCS3A02G050100	2.99064	1.58045	5.58026e-07	4.9147e-06	up		TraesCS2B02G424500	0.252609	-1.98502	1.39893e-56	1.21728e-54	down
TraesCS3A02G050800	19.3196	4.27199	0.000660138	0.00341642	up		TraesCS2B02G424600	0.080819	-3.62916	0.00141466	0.006755	down
TraesCS3A02G061600	2.9879	1.57913	6.619e-63	6.57704e-61	up		TraesCS2B02G425600	0.403177	-1.31052	3.40691e-13	5.57624e-12	down
TraesCS3A02G067400	27.0024	4.75501	0.0016957	0.00789921	up		TraesCS2B02G427500	0.0364983	-4.77603	0.00737682	0.0285324	down
TraesCS3A02G068300	2.46903	1.30394	0.0130213	0.0461512	up		TraesCS2B02G428100	0.483738	-1.0477	3.30827e-05	0.000223995	down
TraesCS3A02G069800	2.49823	1.32091	0.00194231	0.00890064	up		TraesCS2B02G428300	0.444108	-1.17102	5.48391e-76	7.06793e-74	down
TraesCS3A02G075800	2.50875	1.32697	1.5825e-10	2.07742e-09	up		TraesCS2B02G428500	0.280828	-1.83224	8.74104e-151	3.43e-148	down
TraesCS3A02G076000	2.07278	1.05156	0.00416742	0.0173651	up		TraesCS2B02G428800	0.363038	-1.46181	7.94978e-05	0.000502836	down
TraesCS3A02G076100	3.37476	1.75478	0.000709538	0.00364757	up		TraesCS2B02G429200	0.493042	-1.02022	0.00104325	0.00513763	down
TraesCS3A02G076300	21.7764	4.44469	1.95735e-48	1.35796e-46	up		TraesCS2B02G431000	0.419432	-1.25349	1.14098e-17	2.52125e-16	down
TraesCS3A02G076900	2.11539	1.08092	3.40273e-10	4.31608e-09	up		TraesCS2B02G439500	0.476962	-1.06805	2.87114e-10	3.67968e-09	down
TraesCS3A02G077400	3.98558	1.99479	1.91585e-08	2.02002e-07	up		TraesCS2B02G440700	0.251415	-1.99186	0.000326142	0.00181113	down
TraesCS3A02G078400	3.23349	1.69309	1.44766e-48	1.01003e-46	up		TraesCS2B02G447500	0.234778	-2.09063	7.09945e-14	1.22343e-12	down
TraesCS3A02G079300	5.42213	2.43886	9.99297e-11	1.3337e-09	up		TraesCS2B02G447600	0.44329	-1.17368	5.44912e-07	4.80538e-06	down
TraesCS3A02G087300	3.12563	1.64415	1.96435e-18	4.55124e-17	up		TraesCS2B02G448500	0.218315	-2.19552	0.00342187	0.014617	down
TraesCS3A02G096000	2.02679	1.0192	1.32228e-06	1.11226e-05	up		TraesCS2B02G457600	0.0758127	-3.72142	2.1567e-14	3.84012e-13	down
TraesCS3A02G096500	2.56978	1.36165	8.57762e-05	0.000539116	up		TraesCS2B02G459100	0.283481	-1.81868	3.02048e-56	2.57732e-54	down
TraesCS3A02G097400	3.44432	1.78422	1.46887e-09	1.75339e-08	up		TraesCS2B02G470100	0.480882	-1.05624	0.0103302	0.0379403	down
TraesCS3A02G097800	2.56352	1.35813	1.66857e-62	1.63949e-60	up		TraesCS2B02G471800	0.355692	-1.4913	9.91011e-42	5.76518e-40	down
TraesCS3A02G102800	3.61675	1.85469	6.40722e-24	1.9609e-22	up		TraesCS2B02G475700	0.309296	-1.69294	5.62275e-05	0.000365017	down
TraesCS3A02G103800	5.60118	2.48573	6.58392e-64	6.67131e-62	up		TraesCS2B02G475800	0.386132	-1.37283	0.00138639	0.00663575	down
TraesCS3A02G106700	3.39104	1.76173	6.56565e-38	3.34843e-36	up		TraesCS2B02G475900	0.0677687	-3.88324	9.16993e-08	8.93032e-07	down
TraesCS3A02G107000	6.31737	2.65932	6.54453e-34	2.92166e-32	up		TraesCS2B02G476300	0.130037	-2.94301	2.95948e-05	0.000202201	down
TraesCS3A02G109400	5.22363	2.38505	0.000257757	0.00146141	up		TraesCS2B02G477600	0.251967	-1.98869	4.21305e-11	5.80656e-10	down
TraesCS3A02G114900	2.28057	1.18939	7.54148e-12	1.10832e-10	up		TraesCS2B02G478900	0.417756	-1.25927	0.00134512	0.00646102	down
TraesCS3A02G116400	28.2683	4.82111	0.00379622	0.0160144	up		TraesCS2B02G487300	0.237079	-2.07656	0.0138407	0.0486331	down
TraesCS3A02G116900	2.16038	1.11128	0.012869	0.0457034	up		TraesCS2B02G489900	0.426698	-1.22871	9.74466e-06	7.20609e-05	down
TraesCS3A02G123700	2.06322	1.0449	0.0117814	0.0424059	up		TraesCS2B02G491000	0.272316	-1.87665	2.27563e-97	4.45063e-95	down
TraesCS3A02G126300	3.38071	1.75733	8.73711e-07	7.50931e-06	up		TraesCS2B02G498300	0.0410125	-4.60779	0.0129084	0.0458197	down
TraesCS3A02G129600	2.53639	1.34278	9.25052e-05	0.000578282	up		TraesCS2B02G499700	0.286859	-1.80159	9.27285e-09	1.01578e-07	down
TraesCS3A02G133400	2.66808	1.4158	1.57531e-12	2.45015e-11	up		TraesCS2B02G507200	0.157402	-2.66748	1.50618e-135	5.07054e-133	down
TraesCS3A02G136100	2.85692	1.51446	2.77138e-07	2.5377e-06	up		TraesCS2B02G517400	0.46288	-1.11129	5.00709e-13	8.09849e-12	down
TraesCS3A02G140000	2.9881	1.57923	0.001903	0.00874129	up		TraesCS2B02G518900	0.0278703	-5.16513	0.000333381	0.00184749	down
TraesCS3A02G140700	2.43103	1.28157	4.2049e-12	6.31063e-11	up		TraesCS2B02G525500	0.448848	-1.1557	1.05004e-18	2.4672e-17	down
TraesCS3A02G141100	15.3108	3.93648	0.0129242	0.0458627	up		TraesCS2B02G527100	0.451204	-1.14815	0.000849869	0.00427865	down
TraesCS3A02G142800	2.04647	1.03313	2.85441e-06	2.29392e-05	up		TraesCS2B02G529900	0.44444	-1.16994	2.32933e-05	0.000162131	down
TraesCS3A02G146300	2.09642	1.06793	4.12419e-08	4.17893e-07	up		TraesCS2B02G530100	0.262056	-1.93206	3.00677e-134	9.95904e-132	down
TraesCS3A02G149900	59.7243	5.90025	3.45039e-05	0.000232824	up		TraesCS2B02G532600	0.395162	-1.33948	6.18486e-13	9.92526e-12	down
TraesCS3A02G160500	2.09441	1.06655	0.000394083	0.00215176	up		TraesCS2B02G533800	0.0338517	-4.88463	0.00463957	0.0190808	down
TraesCS3A02G166100	2.52255	1.33488	1.2755e-08	1.37401e-07	up		TraesCS2B02G536100	0.48666	-1.03901	0.000109216	0.000672917	down
TraesCS3A02G167100	2.22399	1.15315	0.00059501	0.00310809	up		TraesCS2B02G536500	0.435354	-1.19974	0.00496235	0.02023	down
TraesCS3A02G173300	2.92721	1.54952	2.65993e-69	2.98489e-67	up		TraesCS2B02G541500	0.219187	-2.18977	0.000284043	0.00159648	down
TraesCS3A02G180500	2.56098	1.3567	0.0105909	0.0387498	up		TraesCS2B02G541900	0.00179949	-9.1182	9.86298e-14	1.68225e-12	down
TraesCS3A02G180600	2.8718	1.52196	1.06437e-18	2.49991e-17	up		TraesCS2B02G550200	0.495869	-1.01197	3.30626e-08	3.3796e-07	down
TraesCS3A02G184900	3.44011	1.78245	2.32958e-05	0.000162131	up		TraesCS2B02G552800	0.198303	-2.33422	0.013027	0.0461689	down
TraesCS3A02G191100	2.34133	1.22733	4.43188e-05	0.000293522	up		TraesCS2B02G555100	0.0339684	-4.87966	1.20274e-30	4.84295e-29	down
TraesCS3A02G192000	2.52966	1.33895	2.79859e-30	1.11522e-28	up		TraesCS2B02G556900	0.210315	-2.24938	3.51709e-08	3.585e-07	down
TraesCS3A02G195400	2.36879	1.24415	6.57258e-23	1.90998e-21	up		TraesCS2B02G559600	0.455212	-1.13539	7.88274e-08	7.72315e-07	down
TraesCS3A02G196700	2.17671	1.12215	1.53685e-05	0.00011003	up		TraesCS2B02G562200	0.208142	-2.26436	0.000515919	0.00273672	down
TraesCS3A02G200600	2.64922	1.40557	1.29912e-08	1.39775e-07	up		TraesCS2B02G568700	0.486857	-1.03843	0.011345	0.0410969	down
TraesCS3A02G200700	7.6276	2.93123	0.00599884	0.0238417	up		TraesCS2B02G568900	0.0295192	-5.0822	1.71174e-05	0.00012159	down
TraesCS3A02G209200	2.24976	1.16977	5.09967e-34	2.28658e-32	up		TraesCS2B02G569100	0.107085	-3.22317	1.20313e-13	2.03574e-12	down
TraesCS3A02G213900	2.08348	1.059	1.59952e-07	1.50648e-06	up		TraesCS2B02G571700	0.418938	-1.25519	1.14156e-25	3.78516e-24	down
TraesCS3A02G214400	3.55908	1.8315	0.0074696	0.0288214	up		TraesCS2B02G572500	0.470389	-1.08807	0.000914858	0.00457036	down
TraesCS3A02G215000	2.52591	1.3368	5.73136e-17	1.21129e-15	up		TraesCS2B02G577100	0.0872841	-3.51814	3.25659e-09	3.7585e-08	down
TraesCS3A02G216100	2.07626	1.05399	1.50485e-07	1.4217e-06	up		TraesCS2B02G585600	0.388369	-1.3645	3.1707e-06	2.53162e-05	down
TraesCS3A02G216200	5.01716	2.32687	4.86996e-15	9.05594e-14	up		TraesCS2B02G591000	0.474285	-1.07617	2.24269e-15	4.26174e-14	down
TraesCS3A02G217200	2.02876	1.0206	3.01592e-17	6.48522e-16	up		TraesCS2B02G592600	0.184579	-2.43769	2.94229e-06	2.36146e-05	down
TraesCS3A02G217400	2.14839	1.10325	2.75826e-06	2.22099e-05	up		TraesCS2B02G592700	0.455618	-1.1341	0.000442777	0.002388	down
TraesCS3A02G222100	3.69413	1.88524	3.61122e-05	0.000242746	up		TraesCS2B02G592800	0.27132	-1.88193	0.000821852	0.00415321	down
TraesCS3A02G224400	2.57954	1.36711	0.000234709	0.00134072	up		TraesCS2B02G605000	0.260645	-1.93984	4.96573e-08	4.98409e-07	down
TraesCS3A02G230500	2.00079	1.00057	0.0044344	0.0183386	up		TraesCS2B02G609400	0.015257	-6.03439	4.12924e-05	0.000274927	down
TraesCS3A02G230900	20.8373	4.3811	0.000331208	0.00183727	up		TraesCS2B02G613800	0.403469	-1.30947	1.11499e-14	2.0227e-13	down
TraesCS3A02G231900	3.36859	1.75214	2.114e-18	4.88511e-17	up		TraesCS2B02G615300	0.348634	-1.52021	4.25211e-07	3.80424e-06	down
TraesCS3A02G236100	2.55587	1.35381	0.00295064	0.0128767	up		TraesCS2B02G622500	0.179046	-2.4816	4.32151e-08	4.3724e-07	down
TraesCS3A02G236800	2.09191	1.06482	0.000914146	0.00456754	up		TraesCS2B02G625300	0.478262	-1.06413	0.00401371	0.0168144	down
TraesCS3A02G237800	3.13231	1.64723	1.29764e-05	9.40955e-05	up		TraesCS2B02G626100	0.157367	-2.66779	2.95443e-05	0.000201901	down
TraesCS3A02G238000	2.18482	1.12751	4.94945e-23	1.44171e-21	up		TraesCS2B02G626600	0.188382	-2.40827	0.000701829	0.00361156	down
TraesCS3A02G239300	3.03641	1.60237	3.88576e-06	3.06203e-05	up		TraesCS2D02G006500	0.313617	-1.67292	1.02024e-32	4.37094e-31	down
TraesCS3A02G242600	2.06647	1.04717	0.00181252	0.00838159	up		TraesCS2D02G015500	0.145506	-2.78085	1.3605e-18	3.17486e-17	down
TraesCS3A02G245000	2.30896	1.20725	0.00191053	0.00877292	up		TraesCS2D02G018000	0.0388362	-4.68645	1.47914e-09	1.76497e-08	down
TraesCS3A02G245900	4.72679	2.24086	2.6194e-05	0.00018077	up		TraesCS2D02G028600	0.449026	-1.15513	7.84304e-14	1.34818e-12	down
TraesCS3A02G249000	4.0978	2.03485	3.14275e-16	6.34181e-15	up		TraesCS2D02G028900	0.118574	-3.07614	5.68385e-05	0.000368633	down
TraesCS3A02G254000	6.3066	2.65686	8.48211e-07	7.30645e-06	up		TraesCS2D02G032800	0.435423	-1.19951	4.95006e-05	0.000325081	down
TraesCS3A02G261000	3.04471	1.6063	0.00169447	0.00789465	up		TraesCS2D02G033100	0.247895	-2.0122	1.00891e-58	9.18104e-57	down
TraesCS3A02G275000	2.33254	1.2219	1.34128e-07	1.27539e-06	up		TraesCS2D02G035100	0.355194	-1.49332	0.0111095	0.0403861	down
TraesCS3A02G276500	3.93275	1.97554	1.74156e-175	9.17029e-173	up		TraesCS2D02G043500	0.176216	-2.50458	3.613e-18	8.25004e-17	down
TraesCS3A02G279700	2.52433	1.3359	6.12902e-06	4.68126e-05	up		TraesCS2D02G044600	0.00122028	-9.67857	8.03403e-16	1.5793e-14	down
TraesCS3A02G280800	2.87273	1.52242	3.06776e-07	2.79249e-06	up		TraesCS2D02G054900	0.063899	-3.96806	2.64762e-15	5.01574e-14	down
TraesCS3A02G281700	2.28651	1.19315	0.00398195	0.0166995	up		TraesCS2D02G055300	0.336154	-1.5728	0.000110403	0.000679614	down
TraesCS3A02G284000	2.93874	1.5552	0.0039649	0.0166337	up		TraesCS2D02G065100	0.0886813	-3.49523	0	0	down
TraesCS3A02G288000	2.37323	1.24685	1.29553e-14	2.33989e-13	up		TraesCS2D02G065200	0.34102	-1.55207	1.75722e-108	4.19601e-106	down
TraesCS3A02G290900	2.99441	1.58227	5.78739e-05	0.000375033	up		TraesCS2D02G065300	0.229428	-2.12389	7.58548e-244	7.92066e-241	down
TraesCS3A02G298600	2.13049	1.09118	0.000664662	0.00343753	up		TraesCS2D02G065400	0.297549	-1.7488	1.08743e-51	8.14011e-50	down
TraesCS3A02G300300	52.1798	5.70542	8.43899e-05	0.000530782	up		TraesCS2D02G065600	0.304039	-1.71767	1.72761e-82	2.61506e-80	down
TraesCS3A02G307600	2.76189	1.46566	9.60249e-05	0.000598479	up		TraesCS2D02G065800	0.15368	-2.702	0.00212534	0.00961821	down
TraesCS3A02G314300	29.8592	4.90011	0.00241892	0.0107769	up		TraesCS2D02G079200	0.393217	-1.3466	1.84334e-19	4.51183e-18	down
TraesCS3A02G320200	2.8808	1.52647	0.00850703	0.0321766	up		TraesCS2D02G081400	0.141512	-2.82101	4.0476e-07	3.63182e-06	down
TraesCS3A02G322200	2.27491	1.18581	0.000100566	0.00062386	up		TraesCS2D02G087500	0.452933	-1.14263	1.94292e-13	3.23857e-12	down
TraesCS3A02G326900	2.14195	1.09892	0.00305098	0.013262	up		TraesCS2D02G088800	0.00916132	-6.77023	8.68297e-07	7.46903e-06	down
TraesCS3A02G327100	2.64523	1.40339	6.66708e-15	1.22865e-13	up		TraesCS2D02G088900	0.322804	-1.63127	1.2562e-05	9.1263e-05	down
TraesCS3A02G328200	2.14696	1.10229	0.00725729	0.0281283	up		TraesCS2D02G092500	0.462518	-1.11242	8.52552e-07	7.34282e-06	down
TraesCS3A02G334000	3.26297	1.70618	2.97826e-32	1.26017e-30	up		TraesCS2D02G093100	0.135537	-2.88324	9.46355e-51	6.94072e-49	down
TraesCS3A02G334300	2.02788	1.01997	1.8478e-09	2.18516e-08	up		TraesCS2D02G093800	0.101308	-3.30317	8.54618e-09	9.39516e-08	down
TraesCS3A02G340800	2.13733	1.09581	0.00428663	0.0177932	up		TraesCS2D02G101000	0.439441	-1.18626	7.38431e-70	8.3626e-68	down
TraesCS3A02G340900	33.6618	5.07304	7.5804e-10	9.30476e-09	up		TraesCS2D02G104200	0.370173	-1.43373	3.60841e-19	8.68373e-18	down
TraesCS3A02G341300	3.25067	1.70074	1.78815e-15	3.42014e-14	up		TraesCS2D02G104300	0.200014	-2.32182	7.48967e-112	1.87568e-109	down
TraesCS3A02G342000	3.70055	1.88774	5.89111e-135	1.97247e-132	up		TraesCS2D02G113100	0.204454	-2.29015	3.74809e-21	1.01054e-19	down
TraesCS3A02G343700	20.7536	4.37529	0.00359071	0.0152498	up		TraesCS2D02G115200	0.46939	-1.09114	1.73029e-26	5.96518e-25	down
TraesCS3A02G344400	2.5529	1.35214	2.52204e-11	3.54173e-10	up		TraesCS2D02G115300	0.22779	-2.13422	1.09466e-12	1.72389e-11	down
TraesCS3A02G346400	2.69112	1.42821	2.49971e-06	2.02631e-05	up		TraesCS2D02G115900	0.488033	-1.03495	0.0105383	0.0385898	down
TraesCS3A02G348500	2.37838	1.24998	4.34962e-16	8.70871e-15	up		TraesCS2D02G117400	0.415526	-1.26699	9.47662e-09	1.03552e-07	down
TraesCS3A02G350400	3.40747	1.7687	1.09086e-16	2.26583e-15	up		TraesCS2D02G119100	0.157703	-2.66472	6.73824e-09	7.48509e-08	down
TraesCS3A02G351300	2.83006	1.50083	0.000430122	0.00232749	up		TraesCS2D02G124800	0.294105	-1.7656	1.17553e-17	2.59481e-16	down
TraesCS3A02G354000	2.50489	1.32475	0.00101942	0.00503392	up		TraesCS2D02G125800	0.00469514	-7.73461	3.23172e-10	4.11357e-09	down
TraesCS3A02G355100	2.23875	1.16269	0.00104319	0.00513763	up		TraesCS2D02G128700	0.326063	-1.61678	2.39839e-31	9.81127e-30	down
TraesCS3A02G355500	2.14032	1.09783	1.79738e-29	6.95546e-28	up		TraesCS2D02G129100	0.485948	-1.04113	7.97273e-05	0.000504235	down
TraesCS3A02G356800	2.58574	1.37058	3.8295e-05	0.000256439	up		TraesCS2D02G131100	0.42987	-1.21803	5.54176e-05	0.000360443	down
TraesCS3A02G357100	3.04615	1.60699	0.000223496	0.00128334	up		TraesCS2D02G135600	0.463233	-1.11019	0.00208625	0.00946309	down
TraesCS3A02G358800	6.2577	2.64563	3.59798e-25	1.16114e-23	up		TraesCS2D02G142200	0.111661	-3.16281	1.09151e-17	2.41627e-16	down
TraesCS3A02G360900	3.97043	1.9893	0.000125225	0.000760744	up		TraesCS2D02G143100	0.0388619	-4.6855	0.00168662	0.00786583	down
TraesCS3A02G362200	2.64372	1.40257	3.37367e-22	9.56473e-21	up		TraesCS2D02G145900	0.329485	-1.60172	1.77773e-20	4.60945e-19	down
TraesCS3A02G362500	2.16713	1.11579	8.87818e-11	1.1893e-09	up		TraesCS2D02G146600	0.434992	-1.20094	3.86057e-11	5.33269e-10	down
TraesCS3A02G365500	62.9045	5.97509	2.55601e-05	0.000176692	up		TraesCS2D02G148500	0.029032	-5.10621	0.0019245	0.00882752	down
TraesCS3A02G365800	2.11955	1.08376	9.60275e-05	0.000598479	up		TraesCS2D02G154500	0.191166	-2.3871	3.13853e-19	7.5915e-18	down
TraesCS3A02G377700	11.3702	3.50718	4.96556e-05	0.000326029	up		TraesCS2D02G155700	0.34726	-1.52591	2.20069e-42	1.30113e-40	down
TraesCS3A02G384400	3.42517	1.77618	6.23511e-26	2.08878e-24	up		TraesCS2D02G157300	0.216728	-2.20605	2.88533e-46	1.89304e-44	down
TraesCS3A02G388000	36.0745	5.17291	0.000163112	0.000965401	up		TraesCS2D02G157500	0.0635488	-3.97599	1.741e-89	3.00443e-87	down
TraesCS3A02G391400	2.8256	1.49856	2.65099e-13	4.37267e-12	up		TraesCS2D02G157600	0.267745	-1.90107	1.28973e-35	6.07463e-34	down
TraesCS3A02G396800	3.158	1.65901	4.6745e-45	2.95973e-43	up		TraesCS2D02G157800	0.321343	-1.63781	5.34323e-140	1.839e-137	down
TraesCS3A02G397000	2.80482	1.48791	4.79983e-09	5.42674e-08	up		TraesCS2D02G157900	0.0542405	-4.20449	0	0	down
TraesCS3A02G397700	2.51979	1.33331	1.52113e-31	6.2894e-30	up		TraesCS2D02G158600	0.472088	-1.08287	0.000165021	0.000975481	down
TraesCS3A02G404300	2.96554	1.5683	2.86196e-12	4.35672e-11	up		TraesCS2D02G159000	0.424361	-1.23664	0.0029802	0.0129928	down
TraesCS3A02G422300	5.59524	2.4842	0.000401728	0.00218768	up		TraesCS2D02G160200	0.0292278	-5.09651	6.35439e-79	8.79719e-77	down
TraesCS3A02G428300	7.69255	2.94346	1.56945e-74	1.97728e-72	up		TraesCS2D02G161900	0.424886	-1.23485	4.87108e-54	3.89225e-52	down
TraesCS3A02G438300	22.2686	4.47694	0.0139178	0.0488476	up		TraesCS2D02G168000	0.013115	-6.25264	9.40809e-06	6.97646e-05	down
TraesCS3A02G440700	2.60273	1.38002	0.00206996	0.00940187	up		TraesCS2D02G168600	0.26318	-1.92588	0.000668154	0.00345356	down
TraesCS3A02G441500	3.37469	1.75475	4.87189e-05	0.000320254	up		TraesCS2D02G168800	0.338368	-1.56333	3.30604e-11	4.59763e-10	down
TraesCS3A02G443400	8.3258	3.05759	1.44062e-06	1.20604e-05	up		TraesCS2D02G173300	0.419648	-1.25275	6.53241e-25	2.08088e-23	down
TraesCS3A02G446600	2.74135	1.45488	9.31697e-33	3.99437e-31	up		TraesCS2D02G174200	0.311119	-1.68446	2.95423e-15	5.5675e-14	down
TraesCS3A02G447800	6.19407	2.63089	4.74383e-05	0.000312637	up		TraesCS2D02G176000	0.452118	-1.14523	4.19334e-26	1.41633e-24	down
TraesCS3A02G448400	5.85053	2.54857	0.0137896	0.0484727	up		TraesCS2D02G177100	0.258365	-1.95252	3.22189e-55	2.64655e-53	down
TraesCS3A02G454900	4.07675	2.02742	3.47437e-27	1.22944e-25	up		TraesCS2D02G177900	0.246239	-2.02187	4.92954e-41	2.776e-39	down
TraesCS3A02G455000	3.4914	1.80381	3.94553e-07	3.54637e-06	up		TraesCS2D02G183400	0.0344325	-4.86009	5.12998e-05	0.000335894	down
TraesCS3A02G458100	2.14072	1.0981	7.39031e-06	5.57344e-05	up		TraesCS2D02G189900	0.289355	-1.78909	9.7736e-07	8.36164e-06	down
TraesCS3A02G477300	4.83753	2.27427	4.09184e-65	4.24387e-63	up		TraesCS2D02G190900	0.422919	-1.24155	5.48938e-28	1.99872e-26	down
TraesCS3A02G489700	30.5945	4.9352	0.0005207	0.00275947	up		TraesCS2D02G192500	0.0518181	-4.2704	0.00695273	0.0271374	down
TraesCS3A02G489800	10.8966	3.4458	9.31834e-17	1.9447e-15	up		TraesCS2D02G193400	0.000985747	-9.98649	5.51229e-17	1.16659e-15	down
TraesCS3A02G503300	2.06275	1.04457	0.00910267	0.0340693	up		TraesCS2D02G194500	0.130007	-2.94334	0.0075737	0.0291548	down
TraesCS3A02G507900	3.95496	1.98366	0.014214	0.0497238	up		TraesCS2D02G198200	0.470166	-1.08876	1.283e-51	9.58082e-50	down
TraesCS3A02G509700	4.73869	2.24449	0.000692249	0.00356583	up		TraesCS2D02G200700	0.178015	-2.48993	1.69787e-177	9.33937e-175	down
TraesCS3A02G516200	2.10952	1.07691	2.6183e-09	3.0481e-08	up		TraesCS2D02G203400	0.324794	-1.6224	8.84295e-08	8.62552e-07	down
TraesCS3A02G521400	3.23592	1.69418	4.60464e-05	0.00030431	up		TraesCS2D02G204400	0.445407	-1.1668	1.76055e-36	8.61044e-35	down
TraesCS3A02G521700	2.38372	1.25322	3.27697e-12	4.96274e-11	up		TraesCS2D02G204700	0.257552	-1.95706	1.32476e-79	1.86335e-77	down
TraesCS3A02G521900	3.71283	1.89252	8.29764e-37	4.09938e-35	up		TraesCS2D02G206900	0.130427	-2.93869	3.116e-38	1.6024e-36	down
TraesCS3A02G523200	2.44261	1.28843	8.2348e-12	1.20705e-10	up		TraesCS2D02G207200	0.284172	-1.81516	0.00596345	0.0237271	down
TraesCS3A02G528800	2.21254	1.14571	8.31282e-24	2.52903e-22	up		TraesCS2D02G209900	0.276368	-1.85534	1.58032e-117	4.1785e-115	down
TraesCS3A02G529400	35.8283	5.16303	0.000874297	0.00438515	up		TraesCS2D02G211000	0.385624	-1.37473	3.10753e-47	2.09002e-45	down
TraesCS3A02G529500	16.1141	4.01025	0.0105956	0.0387605	up		TraesCS2D02G211400	0.434354	-1.20306	6.02068e-20	1.51086e-18	down
TraesCS3A02G531300	2.508	1.32653	0.000672406	0.00347379	up		TraesCS2D02G218700	0.179258	-2.47989	2.21719e-44	1.37557e-42	down
TraesCS3A02G531400	3.11288	1.63825	1.61457e-43	9.78062e-42	up		TraesCS2D02G220000	0.404092	-1.30725	4.99311e-27	1.75577e-25	down
TraesCS3A02G535000	4.66267	2.22115	0.0075122	0.0289542	up		TraesCS2D02G220200	0.348764	-1.51968	3.16017e-87	5.26185e-85	down
TraesCS3A02G535100	2.52333	1.33533	1.28486e-13	2.16868e-12	up		TraesCS2D02G220800	0.341656	-1.54938	9.04717e-120	2.43393e-117	down
TraesCS3A02G537100	15.3896	3.94388	1.6262e-05	0.000115928	up		TraesCS2D02G221000	0.036128	-4.79074	4.89943e-10	6.12374e-09	down
TraesCS3B02G005100	2.00729	1.00525	0.000869242	0.00436299	up		TraesCS2D02G225400	0.148192	-2.75446	0.00970901	0.0359958	down
TraesCS3B02G012100	16.9187	4.08054	0.011188	0.0406164	up		TraesCS2D02G225900	0.3642	-1.4572	0.0123193	0.0440611	down
TraesCS3B02G016800	2.184	1.12697	7.19849e-15	1.32263e-13	up		TraesCS2D02G226300	0.374263	-1.41788	1.44394e-26	5.00319e-25	down
TraesCS3B02G021900	2.40847	1.26812	9.32581e-10	1.13567e-08	up		TraesCS2D02G228500	0.477858	-1.06534	2.73026e-14	4.82927e-13	down
TraesCS3B02G023400	4.68832	2.22907	0.000963296	0.00478518	up		TraesCS2D02G228900	0.12456	-3.00508	7.48167e-12	1.09979e-10	down
TraesCS3B02G024000	2.42876	1.28022	0.00195793	0.0089642	up		TraesCS2D02G231100	0.156554	-2.67527	9.32766e-287	1.33639e-283	down
TraesCS3B02G024200	4.50504	2.17154	5.81534e-05	0.000376725	up		TraesCS2D02G238700	0.495684	-1.01251	5.31005e-34	2.37399e-32	down
TraesCS3B02G031400	2.48903	1.31558	0.0104245	0.0382411	up		TraesCS2D02G239500	0.413	-1.27579	0.00127647	0.00616682	down
TraesCS3B02G031500	3.1167	1.64002	0.00132988	0.00639828	up		TraesCS2D02G248400	0.490579	-1.02744	8.56062e-40	4.65896e-38	down
TraesCS3B02G032400	3.55062	1.82807	6.95751e-11	9.41013e-10	up		TraesCS2D02G252400	0.392754	-1.3483	1.98672e-07	1.85196e-06	down
TraesCS3B02G039000	3.22628	1.68987	4.41569e-30	1.74831e-28	up		TraesCS2D02G253200	0.3642	-1.4572	1.00545e-75	1.28779e-73	down
TraesCS3B02G039100	35.7561	5.16012	1.72387e-21	4.73695e-20	up		TraesCS2D02G257100	0.202962	-2.30072	1.57765e-06	1.31343e-05	down
TraesCS3B02G039500	3.25835	1.70414	1.49426e-06	1.24705e-05	up		TraesCS2D02G257700	0.0990437	-3.33579	0.000704019	0.00362162	down
TraesCS3B02G039600	2.70039	1.43317	3.53883e-30	1.40475e-28	up		TraesCS2D02G259200	0.199029	-2.32895	3.62701e-32	1.52943e-30	down
TraesCS3B02G039700	4.50861	2.17268	1.23719e-16	2.56115e-15	up		TraesCS2D02G261005	0.355271	-1.49301	0.00035581	0.00196138	down
TraesCS3B02G040100	2.61108	1.38465	0.000672788	0.00347547	up		TraesCS2D02G267000	0.267224	-1.90388	0.00522838	0.0211535	down
TraesCS3B02G042700	28.4408	4.82989	0.00349978	0.0149067	up		TraesCS2D02G267100	0.322911	-1.63079	8.33311e-06	6.2394e-05	down
TraesCS3B02G044700	5.03506	2.33201	0.010556	0.0386478	up		TraesCS2D02G268600	0.146615	-2.76989	2.12464e-21	5.82262e-20	down
TraesCS3B02G048200	2.12767	1.08928	0.00156661	0.0073765	up		TraesCS2D02G271700	0.49313	-1.01996	7.05025e-24	2.15342e-22	down
TraesCS3B02G048700	3.17629	1.66734	4.43355e-14	7.73981e-13	up		TraesCS2D02G273400	0.310419	-1.68771	6.34658e-09	7.07041e-08	down
TraesCS3B02G048800	2.07479	1.05296	7.12976e-20	1.78048e-18	up		TraesCS2D02G273600	0.224167	-2.15735	6.44604e-182	3.67705e-179	down
TraesCS3B02G050500	2.75303	1.46102	0.00569429	0.0228138	up		TraesCS2D02G274100	0.48061	-1.05706	0.00818102	0.0311501	down
TraesCS3B02G052600	3.11503	1.63924	1.89658e-24	5.95831e-23	up		TraesCS2D02G276900	0.223525	-2.16149	1.29e-220	9.93416e-218	down
TraesCS3B02G053700	15.7664	3.97878	0.0001232	0.000749478	up		TraesCS2D02G277900	0.459897	-1.12062	0.00264525	0.0116587	down
TraesCS3B02G055700	2.99945	1.5847	3.83354e-23	1.12463e-21	up		TraesCS2D02G281500	0.398514	-1.3273	1.80257e-31	7.41825e-30	down
TraesCS3B02G055900	5.71145	2.51386	5.83748e-05	0.000377961	up		TraesCS2D02G283600	0.338366	-1.56334	9.78141e-09	1.06731e-07	down
TraesCS3B02G058400	22.4757	4.49029	0.000171026	0.0010075	up		TraesCS2D02G289900	0.0186476	-5.74487	0.000199294	0.00115829	down
TraesCS3B02G059017	2.17119	1.11848	0.00769037	0.0295485	up		TraesCS2D02G294300	0.313245	-1.67464	2.99751e-80	4.2946e-78	down
TraesCS3B02G059700	20.2113	4.33709	0.000458263	0.00246225	up		TraesCS2D02G296100	0.412766	-1.2766	0.00145887	0.00693548	down
TraesCS3B02G062700	3.17431	1.66644	0.00019106	0.0011139	up		TraesCS2D02G296700	0.44508	-1.16786	1.04254e-23	3.15305e-22	down
TraesCS3B02G064900	3.22943	1.69128	0.00426783	0.0177235	up		TraesCS2D02G300000	0.370992	-1.43054	1.76119e-87	2.94042e-85	down
TraesCS3B02G068500	52.8984	5.72515	1.65128e-05	0.000117594	up		TraesCS2D02G301000	0.418034	-1.25831	9.3179e-75	1.18117e-72	down
TraesCS3B02G073700	4.30371	2.10558	3.41955e-05	0.000230894	up		TraesCS2D02G304200	0.381977	-1.38844	3.53099e-07	3.19011e-06	down
TraesCS3B02G075300	2.83004	1.50082	0.00441162	0.0182554	up		TraesCS2D02G312000	0.422204	-1.24399	3.42874e-15	6.44007e-14	down
TraesCS3B02G084700	2.86069	1.51636	0.000448364	0.00241412	up		TraesCS2D02G312600	0.461205	-1.11652	0.00235833	0.0105374	down
TraesCS3B02G086900	2.94288	1.55723	1.33442e-17	2.92978e-16	up		TraesCS2D02G313700	0.269587	-1.89117	1.56604e-151	6.3058e-149	down
TraesCS3B02G090200	12.7531	3.67277	1.6856e-39	9.1092e-38	up		TraesCS2D02G315200	0.317976	-1.65301	1.33355e-12	2.08465e-11	down
TraesCS3B02G091100	2.21899	1.14991	1.44095e-08	1.54126e-07	up		TraesCS2D02G320900	0.193847	-2.36701	5.32307e-94	9.87766e-92	down
TraesCS3B02G093300	6.74844	2.75455	7.48747e-143	2.72947e-140	up		TraesCS2D02G322900	0.289641	-1.78766	1.42696e-59	1.33198e-57	down
TraesCS3B02G094500	4.47989	2.16346	2.20248e-15	4.19049e-14	up		TraesCS2D02G325600	0.452498	-1.14402	2.70342e-38	1.39372e-36	down
TraesCS3B02G095300	9.61558	3.26537	0.00103681	0.00510997	up		TraesCS2D02G331600	0.489047	-1.03195	1.69968e-05	0.000120761	down
TraesCS3B02G102800	2.85762	1.51481	0.0063366	0.0250159	up		TraesCS2D02G332900	0.0383926	-4.70303	0.0079452	0.030393	down
TraesCS3B02G103500	2.25553	1.17347	0.000505757	0.00268698	up		TraesCS2D02G333800	0.402303	-1.31365	0.000202566	0.00117598	down
TraesCS3B02G108000	3.01267	1.59104	6.93408e-55	5.63572e-53	up		TraesCS2D02G336800	0.135624	-2.88231	4.27327e-282	5.48465e-279	down
TraesCS3B02G119600	3.7093	1.89115	0.00134103	0.0064454	up		TraesCS2D02G336900	0.0301625	-5.0511	1.31493e-236	1.2274e-233	down
TraesCS3B02G125400	2.50207	1.32312	2.08377e-08	2.18548e-07	up		TraesCS2D02G338200	0.457591	-1.12787	6.16327e-40	3.36316e-38	down
TraesCS3B02G125500	6.44391	2.68794	1.83608e-24	5.77413e-23	up		TraesCS2D02G339600	0.482121	-1.05253	5.68317e-18	1.28062e-16	down
TraesCS3B02G128500	2.93377	1.55276	1.16062e-27	4.1741e-26	up		TraesCS2D02G340600	0.321471	-1.63724	2.83354e-05	0.000194243	down
TraesCS3B02G129300	2.56829	1.36081	0.00944983	0.0351895	up		TraesCS2D02G343500	0.278639	-1.84353	0.00279269	0.012249	down
TraesCS3B02G137300	2.70332	1.43473	1.04092e-21	2.89385e-20	up		TraesCS2D02G347200	0.1326	-2.91485	2.24793e-56	1.9288e-54	down
TraesCS3B02G140300	2.63097	1.3956	0.0131711	0.0465912	up		TraesCS2D02G356300	0.408482	-1.29165	8.3019e-05	0.000522749	down
TraesCS3B02G142200	2.50417	1.32433	0.00109362	0.00536209	up		TraesCS2D02G361400	0.235036	-2.08904	1.27373e-109	3.08941e-107	down
TraesCS3B02G144700	2.69786	1.43182	0.003242	0.0139593	up		TraesCS2D02G366000	0.0176273	-5.82604	2.07159e-07	1.92553e-06	down
TraesCS3B02G150100	5.51876	2.46434	0.00380271	0.0160347	up		TraesCS2D02G367700	0.00482395	-7.69557	1.32454e-09	1.58633e-08	down
TraesCS3B02G150200	2.84821	1.51006	0.000133256	0.000804696	up		TraesCS2D02G367900	0.00895689	-6.80279	3.51314e-19	8.46487e-18	down
TraesCS3B02G154000	3.56259	1.83293	0.000408261	0.00222091	up		TraesCS2D02G368000	0.0291184	-5.10193	1.19409e-16	2.47524e-15	down
TraesCS3B02G158300	5.98558	2.58149	8.77922e-56	7.38882e-54	up		TraesCS2D02G369800	0.439067	-1.18749	0.000728613	0.00373442	down
TraesCS3B02G160200	28.4408	4.82989	0.00349978	0.0149067	up		TraesCS2D02G374400	0.195504	-2.35473	2.49502e-11	3.50618e-10	down
TraesCS3B02G163700	2.04492	1.03204	0.00223153	0.01004	up		TraesCS2D02G375400	0.314606	-1.66838	2.62857e-08	2.72486e-07	down
TraesCS3B02G167100	2.38554	1.25431	2.9145e-07	2.66163e-06	up		TraesCS2D02G376100	0.455798	-1.13353	5.00275e-20	1.26055e-18	down
TraesCS3B02G169300	4.74221	2.24556	6.99266e-08	6.88834e-07	up		TraesCS2D02G378400	0.444444	-1.16993	2.02895e-49	1.44339e-47	down
TraesCS3B02G172600	17.8908	4.16115	0.000746269	0.0038138	up		TraesCS2D02G378700	0.330422	-1.59762	4.24073e-05	0.000281894	down
TraesCS3B02G179500	2.61961	1.38935	0.00144984	0.00690159	up		TraesCS2D02G379600	0.479869	-1.05929	0.000935251	0.00466278	down
TraesCS3B02G180200	2.42934	1.28056	0.00193285	0.00886186	up		TraesCS2D02G380500	0.459652	-1.12139	1.31527e-16	2.71457e-15	down
TraesCS3B02G182400	3.37545	1.75508	0.0061572	0.0243941	up		TraesCS2D02G380900	0.381316	-1.39094	3.57736e-39	1.89828e-37	down
TraesCS3B02G183300	2.31457	1.21075	4.58562e-68	5.00011e-66	up		TraesCS2D02G381000	0.0341078	-4.87376	0	0	down
TraesCS3B02G184900	2.02874	1.02059	0.000409604	0.00222683	up		TraesCS2D02G381200	0.35277	-1.5032	5.7538e-21	1.53121e-19	down
TraesCS3B02G196300	2.16096	1.11167	5.35201e-33	2.31383e-31	up		TraesCS2D02G386300	0.210649	-2.24709	3.35241e-06	2.66607e-05	down
TraesCS3B02G197300	2.0792	1.05603	0.00189948	0.008728	up		TraesCS2D02G387800	0.482661	-1.05092	5.46471e-22	1.53869e-20	down
TraesCS3B02G197400	2.20194	1.13878	1.73592e-06	1.43723e-05	up		TraesCS2D02G394200	0.17142	-2.54439	1.49599e-59	1.3943e-57	down
TraesCS3B02G210300	2.93872	1.55519	1.20019e-11	1.73486e-10	up		TraesCS2D02G394300	0.0304466	-5.03757	0.00051264	0.00272026	down
TraesCS3B02G214700	4.0009	2.00032	2.61148e-11	3.66148e-10	up		TraesCS2D02G397100	0.143557	-2.8003	2.04714e-12	3.1498e-11	down
TraesCS3B02G215900	2.01215	1.00874	3.84876e-06	3.03482e-05	up		TraesCS2D02G397500	0.125638	-2.99265	1.37102e-182	7.89388e-180	down
TraesCS3B02G226200	2.68487	1.42485	8.55448e-12	1.25241e-10	up		TraesCS2D02G397800	0.26799	-1.89975	0.00117725	0.0057288	down
TraesCS3B02G230400	2.82874	1.50016	0.00464044	0.0190831	up		TraesCS2D02G400100	0.0161064	-5.95622	4.63293e-05	0.000305917	down
TraesCS3B02G245800	2.10842	1.07616	1.10909e-06	9.41282e-06	up		TraesCS2D02G401500	0.152575	-2.71241	1.41388e-64	1.45661e-62	down
TraesCS3B02G246300	3.74006	1.90306	3.99461e-11	5.5129e-10	up		TraesCS2D02G403800	0.190322	-2.39349	1.14729e-95	2.1748e-93	down
TraesCS3B02G248400	2.04742	1.03381	1.3996e-06	1.17298e-05	up		TraesCS2D02G404800	0.455204	-1.13542	4.95796e-12	7.39935e-11	down
TraesCS3B02G259800	2.59562	1.37608	0.00245585	0.0109193	up		TraesCS2D02G407200	0.43073	-1.21514	1.28711e-24	4.06225e-23	down
TraesCS3B02G261200	6.28473	2.65185	2.59888e-28	9.58164e-27	up		TraesCS2D02G407300	0.367868	-1.44274	4.33085e-67	4.64019e-65	down
TraesCS3B02G262700	2.35241	1.23414	1.99514e-24	6.25201e-23	up		TraesCS2D02G407500	0.477698	-1.06583	0.00578182	0.0231104	down
TraesCS3B02G265200	2.79081	1.48068	0.0130664	0.0462818	up		TraesCS2D02G407800	0.304647	-1.71479	6.19661e-13	9.93894e-12	down
TraesCS3B02G265500	2.49123	1.31686	9.55338e-06	7.07653e-05	up		TraesCS2D02G408900	0.0209172	-5.57917	4.08287e-05	0.000272104	down
TraesCS3B02G266200	6.2654	2.64741	0.00132686	0.00638573	up		TraesCS2D02G412900	0.0353168	-4.8235	0.00697783	0.0272181	down
TraesCS3B02G266600	2.01672	1.01201	0.00198573	0.00907124	up		TraesCS2D02G414600	0.280085	-1.83606	4.10539e-60	3.86729e-58	down
TraesCS3B02G268600	42.0514	5.39408	0.000760586	0.0038786	up		TraesCS2D02G415700	0.415606	-1.26671	0.000442267	0.00238588	down
TraesCS3B02G275400	3.11859	1.64089	1.53268e-194	9.34888e-192	up		TraesCS2D02G417300	0.425673	-1.23218	1.47734e-15	2.84777e-14	down
TraesCS3B02G277900	3.72091	1.89566	1.7913e-26	6.16517e-25	up		TraesCS2D02G418600	0.315568	-1.66398	0.00849491	0.0321367	down
TraesCS3B02G280300	2.44075	1.28732	6.72147e-07	5.85865e-06	up		TraesCS2D02G422000	0.314461	-1.66905	4.79668e-17	1.01935e-15	down
TraesCS3B02G283900	3.97648	1.99149	2.05209e-45	1.31144e-43	up		TraesCS2D02G425000	0.448647	-1.15635	5.66302e-32	2.37173e-30	down
TraesCS3B02G287200	2.3925	1.25852	7.46585e-67	7.95759e-65	up		TraesCS2D02G425200	0.4899	-1.02944	0.00147063	0.00698434	down
TraesCS3B02G288100	2.10929	1.07676	0.0051157	0.0207631	up		TraesCS2D02G425300	0.467121	-1.09813	0.00338646	0.0144944	down
TraesCS3B02G290700	2.31461	1.21077	0.00054188	0.0028599	up		TraesCS2D02G430300	0.255236	-1.9701	0.000182806	0.00107065	down
TraesCS3B02G291400	2.01955	1.01403	0.00139005	0.00665139	up		TraesCS2D02G431000	0.477783	-1.06557	2.96908e-33	1.29361e-31	down
TraesCS3B02G291900	3.90293	1.96456	1.95228e-06	1.60473e-05	up		TraesCS2D02G432900	0.428083	-1.22404	1.06524e-23	3.22014e-22	down
TraesCS3B02G298800	3.50648	1.81003	3.37661e-05	0.000228245	up		TraesCS2D02G433400	0.281644	-1.82806	0.00142209	0.00678677	down
TraesCS3B02G300300	3.54778	1.82692	1.30503e-56	1.13879e-54	up		TraesCS2D02G434500	0.109037	-3.19712	1.07069e-128	3.24935e-126	down
TraesCS3B02G307100	2.54432	1.34728	0.00297166	0.012962	up		TraesCS2D02G435600	0.475679	-1.07194	0.00304318	0.0132337	down
TraesCS3B02G308000	79.6735	6.31603	6.93399e-07	6.03535e-06	up		TraesCS2D02G436200	0.425192	-1.23381	8.10263e-27	2.83142e-25	down
TraesCS3B02G309600	2.10303	1.07247	0.000113503	0.000697516	up		TraesCS2D02G442000	0.412571	-1.27729	4.90665e-16	9.80734e-15	down
TraesCS3B02G309900	4.58856	2.19804	0.0015096	0.00714794	up		TraesCS2D02G444200	0.266902	-1.90562	2.30291e-06	1.87542e-05	down
TraesCS3B02G311000	3.62851	1.85938	4.36075e-29	1.65733e-27	up		TraesCS2D02G449400	0.194541	-2.36185	1.78011e-141	6.3027e-139	down
TraesCS3B02G314600	3.13875	1.65019	2.2253e-42	1.31442e-40	up		TraesCS2D02G454000	0.0296863	-5.07406	0.0042346	0.0176093	down
TraesCS3B02G317400	3.87887	1.95563	0.000759696	0.00387439	up		TraesCS2D02G454100	0.260511	-1.94058	0.0130327	0.0461759	down
TraesCS3B02G321400	2.04016	1.02868	0.0052136	0.0211082	up		TraesCS2D02G454300	0.260194	-1.94234	1.42789e-08	1.52881e-07	down
TraesCS3B02G325100	2.40708	1.26728	1.37906e-12	2.15469e-11	up		TraesCS2D02G454400	0.033418	-4.90323	3.04658e-10	3.89239e-09	down
TraesCS3B02G329600	3.49097	1.80363	6.47882e-08	6.41396e-07	up		TraesCS2D02G460800	0.326507	-1.61481	2.41211e-11	3.39549e-10	down
TraesCS3B02G331500	3.01126	1.59037	5.96622e-06	4.56824e-05	up		TraesCS2D02G464200	0.417745	-1.25931	1.16349e-06	9.84468e-06	down
TraesCS3B02G335800	2.65664	1.4096	0.0111805	0.0405937	up		TraesCS2D02G464400	0.151079	-2.72663	0.00152722	0.0072186	down
TraesCS3B02G337900	2.41513	1.2721	6.41243e-06	4.88199e-05	up		TraesCS2D02G464800	0.443529	-1.1729	8.07188e-72	9.5448e-70	down
TraesCS3B02G345800	3.1387	1.65017	3.87796e-17	8.28108e-16	up		TraesCS2D02G467100	0.457539	-1.12803	0.00473366	0.0194275	down
TraesCS3B02G346000	2.14171	1.09876	0.00122553	0.00594171	up		TraesCS2D02G467700	0.0948682	-3.39793	0.00153639	0.00725528	down
TraesCS3B02G360400	3.57351	1.83734	1.16361e-12	1.82828e-11	up		TraesCS2D02G471000	0.0723745	-3.78837	3.91455e-09	4.47345e-08	down
TraesCS3B02G365000	2.72037	1.4438	1.08244e-31	4.49971e-30	up		TraesCS2D02G481400	0.29915	-1.74106	2.40922e-10	3.11164e-09	down
TraesCS3B02G365300	11.4056	3.51167	1.13191e-05	8.27014e-05	up		TraesCS2D02G482000	0.353887	-1.49864	0.00325828	0.0140177	down
TraesCS3B02G366100	3.42084	1.77435	1.37018e-05	9.89019e-05	up		TraesCS2D02G482100	0.0253659	-5.30096	0.000917691	0.00458265	down
TraesCS3B02G372600	11.18	3.48285	5.70257e-16	1.13438e-14	up		TraesCS2D02G483000	0.090305	-3.46905	4.7069e-86	7.69173e-84	down
TraesCS3B02G373400	3.10811	1.63604	1.1202e-39	6.07502e-38	up		TraesCS2D02G483700	0.390745	-1.3557	3.152e-24	9.78756e-23	down
TraesCS3B02G377400	7.40156	2.88783	0.00875366	0.0329622	up		TraesCS2D02G483800	0.294363	-1.76433	2.56356e-19	6.22766e-18	down
TraesCS3B02G378600	2.91398	1.54299	1.2356e-14	2.23426e-13	up		TraesCS2D02G483900	0.41347	-1.27415	0.00385896	0.0162412	down
TraesCS3B02G380400	2.33669	1.22447	4.39419e-09	4.98998e-08	up		TraesCS2D02G496500	0.499078	-1.00266	2.86709e-13	4.71397e-12	down
TraesCS3B02G383800	2.58806	1.37187	4.01675e-05	0.000268133	up		TraesCS2D02G497400	0.41767	-1.25957	4.97842e-29	1.88858e-27	down
TraesCS3B02G383900	8.88875	3.15198	3.48159e-18	7.95883e-17	up		TraesCS2D02G500000	0.455228	-1.13534	1.75607e-05	0.000124523	down
TraesCS3B02G385200	3.495	1.80529	0.00510165	0.0207156	up		TraesCS2D02G500600	0.460327	-1.11927	4.27641e-72	5.10575e-70	down
TraesCS3B02G386800	3.1843	1.67097	4.41594e-05	0.000292561	up		TraesCS2D02G502300	0.490422	-1.0279	2.43154e-11	3.42087e-10	down
TraesCS3B02G389700	2.89362	1.53287	0.000176937	0.00103963	up		TraesCS2D02G502700	0.409022	-1.28975	2.36339e-10	3.05534e-09	down
TraesCS3B02G390100	2.64353	1.40247	3.82249e-05	0.000256025	up		TraesCS2D02G504900	0.397668	-1.33036	4.77132e-35	2.2002e-33	down
TraesCS3B02G391000	8.9857	3.16763	0.0116016	0.041876	up		TraesCS2D02G506300	0.27412	-1.86712	1.16759e-128	3.50885e-126	down
TraesCS3B02G394600	4.19358	2.06818	1.71031e-71	2.00317e-69	up		TraesCS2D02G506700	0.423662	-1.23902	0.00651262	0.0256111	down
TraesCS3B02G397300	2.99153	1.58088	5.33094e-05	0.000347795	up		TraesCS2D02G514500	0.0476938	-4.39006	7.36576e-14	1.2679e-12	down
TraesCS3B02G400100	2.67491	1.41949	1.06559e-12	1.68112e-11	up		TraesCS2D02G514600	0.00933557	-6.74305	5.32541e-07	4.70436e-06	down
TraesCS3B02G405800	2.1005	1.07073	2.82087e-07	2.5811e-06	up		TraesCS2D02G514700	0.0511284	-4.28973	7.23026e-68	7.85599e-66	down
TraesCS3B02G407600	4.14194	2.05031	4.29684e-11	5.91279e-10	up		TraesCS2D02G518200	0.1462	-2.77398	0.000206325	0.001196	down
TraesCS3B02G411600	15.2962	3.9351	0.0137086	0.0482322	up		TraesCS2D02G518600	0.166656	-2.58506	0.00805566	0.0307564	down
TraesCS3B02G413900	2.01311	1.00943	0.000567702	0.00298162	up		TraesCS2D02G518800	0.450283	-1.1511	0.00965501	0.0358316	down
TraesCS3B02G420700	3.03205	1.60029	0.00864234	0.0326148	up		TraesCS2D02G523100	0.146686	-2.7692	6.06498e-05	0.000391661	down
TraesCS3B02G427600	2.16968	1.11748	8.58075e-08	8.38038e-07	up		TraesCS2D02G531819	0.448473	-1.15691	2.38416e-14	4.23409e-13	down
TraesCS3B02G428100	2.07237	1.05128	0.00128937	0.00622137	up		TraesCS2D02G538200	0.243715	-2.03673	0.0039222	0.0164725	down
TraesCS3B02G428700	3.73802	1.90227	2.48355e-30	9.91603e-29	up		TraesCS2D02G539300	0.483018	-1.04985	7.46528e-05	0.000474333	down
TraesCS3B02G428800	2.99894	1.58445	8.72934e-23	2.52958e-21	up		TraesCS2D02G540100	0.15994	-2.6444	7.51919e-29	2.83151e-27	down
TraesCS3B02G429000	3.19602	1.67628	6.92608e-30	2.72474e-28	up		TraesCS2D02G540300	0.348432	-1.52105	8.29862e-44	5.07195e-42	down
TraesCS3B02G434900	2.28377	1.19142	0.00269122	0.0118436	up		TraesCS2D02G540600	0.435862	-1.19806	8.05428e-17	1.68718e-15	down
TraesCS3B02G440100	2.35238	1.23412	0.000465675	0.00249685	up		TraesCS2D02G540700	0.202594	-2.30333	1.2493e-17	2.75074e-16	down
TraesCS3B02G440500	3.26243	1.70595	0.0092002	0.0343784	up		TraesCS2D02G541000	0.396208	-1.33567	7.08128e-16	1.39826e-14	down
TraesCS3B02G441200	2.88194	1.52704	0.0016441	0.00769476	up		TraesCS2D02G541200	0.186784	-2.42056	0.00109396	0.00536335	down
TraesCS3B02G449100	5.26615	2.39675	0.0108106	0.0394463	up		TraesCS2D02G542600	0.371351	-1.42915	3.20569e-91	5.67508e-89	down
TraesCS3B02G450500	2.5164	1.33136	0.000166489	0.000983309	up		TraesCS2D02G543300	0.232476	-2.10485	3.57708e-07	3.22938e-06	down
TraesCS3B02G465200	8.00888	3.0016	1.48567e-08	1.586e-07	up		TraesCS2D02G543400	0.113188	-3.14321	4.61564e-07	4.10681e-06	down
TraesCS3B02G465400	26.6997	4.73875	0.0013563	0.00650809	up		TraesCS2D02G543500	0.0969983	-3.3659	7.62505e-10	9.3577e-09	down
TraesCS3B02G474400	2.36371	1.24105	6.87333e-06	5.211e-05	up		TraesCS2D02G543600	0.227627	-2.13526	0.000244947	0.00139468	down
TraesCS3B02G476000	4.54674	2.18483	9.08639e-06	6.76478e-05	up		TraesCS2D02G543900	0.479893	-1.05921	1.52487e-07	1.43964e-06	down
TraesCS3B02G477600	2.21433	1.14687	0.000905813	0.00452995	up		TraesCS2D02G545000	0.439498	-1.18607	3.9675e-29	1.51441e-27	down
TraesCS3B02G481000	8.55136	3.09615	0.00018178	0.00106545	up		TraesCS2D02G547400	0.371086	-1.43018	1.36896e-05	9.88255e-05	down
TraesCS3B02G481800	2.46483	1.30149	3.99522e-31	1.62464e-29	up		TraesCS2D02G547700	0.224109	-2.15773	0.00775951	0.0297789	down
TraesCS3B02G484200	3.7754	1.91663	6.31549e-06	4.81295e-05	up		TraesCS2D02G552200	0.201449	-2.31151	6.4611e-50	4.66099e-48	down
TraesCS3B02G487500	3.02417	1.59654	0.0130706	0.0462926	up		TraesCS2D02G554700	0.03381	-4.8864	1.47934e-06	1.2356e-05	down
TraesCS3B02G493700	6.4903	2.69828	2.02147e-30	8.09733e-29	up		TraesCS2D02G555300	0.148715	-2.74938	4.85609e-36	2.32998e-34	down
TraesCS3B02G495700	33.6747	5.07359	1.08257e-05	7.93692e-05	up		TraesCS2D02G559200	0.352797	-1.50309	3.67337e-21	9.90828e-20	down
TraesCS3B02G496500	2.79071	1.48063	2.38648e-06	1.93989e-05	up		TraesCS2D02G564900	0.384001	-1.38082	7.53871e-09	8.33371e-08	down
TraesCS3B02G502100	32.8438	5.03755	0.00143381	0.00683582	up		TraesCS2D02G572000	0.476677	-1.06892	7.99596e-07	6.90893e-06	down
TraesCS3B02G502300	2.06789	1.04816	0.0128717	0.0457081	up		TraesCS2D02G572600	0.357027	-1.48589	0.0117822	0.0424061	down
TraesCS3B02G532300	6.41873	2.68229	3.55198e-09	4.07499e-08	up		TraesCS2D02G574200	0.4154	-1.26743	3.12768e-06	2.50159e-05	down
TraesCS3B02G535500	32.165	5.00742	0.000334744	0.00185421	up		TraesCS2D02G581700	0.0922027	-3.43905	0.000204103	0.00118401	down
TraesCS3B02G536100	2.4195	1.27471	3.2129e-10	4.09046e-09	up		TraesCS2D02G582200	0.263076	-1.92645	1.87469e-45	1.19931e-43	down
TraesCS3B02G540200	44.1261	5.46356	2.51929e-19	6.12252e-18	up		TraesCS2D02G584900	0.448037	-1.15831	3.19073e-10	4.06559e-09	down
TraesCS3B02G544700	7.1409	2.83611	0.00147819	0.00701702	up		TraesCS2D02G588000	0.0550562	-4.18295	0.00145267	0.00691293	down
TraesCS3B02G546300	2.10304	1.07248	0.000454448	0.00244261	up		TraesCS2D02G588800	0.211365	-2.24219	3.3392e-05	0.000225865	down
TraesCS3B02G550200	26.6608	4.73665	2.50314e-08	2.6036e-07	up		TraesCS2D02G589300	0.189643	-2.39864	1.23735e-10	1.63969e-09	down
TraesCS3B02G551000	17.9859	4.1688	0.000963814	0.00478698	up		TraesCS2D02G589600	0.448881	-1.15559	1.56363e-11	2.23868e-10	down
TraesCS3B02G551200	2.0554	1.03942	0.00862258	0.0325477	up		TraesCS2D02G593400	0.464447	-1.10641	7.71375e-08	7.5648e-07	down
TraesCS3B02G551500	38.8311	5.27914	0.000535275	0.00282868	up		TraesCS2D02G596300	0.496038	-1.01148	1.60802e-29	6.23444e-28	down
TraesCS3B02G555800	6.18099	2.62784	4.79899e-69	5.33667e-67	up		TraesCS2D02G597200	0.497892	-1.0061	3.04265e-08	3.12727e-07	down
TraesCS3B02G555900	3.94925	1.98158	1.16623e-09	1.4063e-08	up		TraesCS2D02G598200	0.276484	-1.85473	3.32298e-06	2.64597e-05	down
TraesCS3B02G556500	2.30775	1.20649	1.79702e-08	1.90124e-07	up		TraesCS2D02G598500	0.430102	-1.21725	6.41681e-57	5.63938e-55	down
TraesCS3B02G562400	2.27065	1.18311	0.000344094	0.00190207	up		TraesCS2D02G600100	0.417907	-1.25875	7.08706e-28	2.56529e-26	down
TraesCS3B02G565900	21.9415	4.45559	4.6558e-15	8.67079e-14	up		TraesCS3A02G001200	0.13623	-2.87588	0.00581118	0.0232082	down
TraesCS3B02G566700	2.3942	1.25954	1.00284e-08	1.09194e-07	up		TraesCS3A02G001600	0.00858481	-6.864	2.74904e-07	2.51799e-06	down
TraesCS3B02G573500	2.53042	1.33938	0.0021697	0.00979903	up		TraesCS3A02G011600	0.290106	-1.78535	0.000817362	0.00413391	down
TraesCS3B02G574600	2.44746	1.29128	1.49667e-08	1.59663e-07	up		TraesCS3A02G012200	0.248755	-2.0072	1.89457e-25	6.20845e-24	down
TraesCS3B02G578500	29.2361	4.86968	0.000841593	0.00424219	up		TraesCS3A02G019300	0.435945	-1.19778	0.0139122	0.0488343	down
TraesCS3B02G578600	5.09665	2.34955	2.01502e-05	0.000141518	up		TraesCS3A02G019600	0.0136556	-6.19436	1.25739e-05	9.13164e-05	down
TraesCS3B02G583100	6.95261	2.79755	0.0128591	0.0456788	up		TraesCS3A02G022600	0.354542	-1.49597	2.40777e-64	2.46405e-62	down
TraesCS3B02G591700	2.79649	1.48362	6.258e-09	6.98309e-08	up		TraesCS3A02G035300	0.388669	-1.36339	4.98888e-15	9.26591e-14	down
TraesCS3B02G597900	2.96543	1.56824	1.0278e-46	6.80854e-45	up		TraesCS3A02G042100	0.26703	-1.90493	0.00548339	0.0220535	down
TraesCS3B02G598200	94.0344	6.55512	9.15162e-07	7.85133e-06	up		TraesCS3A02G042400	0.182214	-2.45629	1.39544e-07	1.32361e-06	down
TraesCS3B02G598400	6.74428	2.75366	1.70514e-39	9.20671e-38	up		TraesCS3A02G042700	0.298121	-1.74603	4.51901e-05	0.000298876	down
TraesCS3B02G601700	2.74646	1.45757	1.91524e-13	3.19416e-12	up		TraesCS3A02G053900	0.147728	-2.75898	0.00115784	0.00564059	down
TraesCS3B02G602400	3.06555	1.61614	2.37311e-11	3.34325e-10	up		TraesCS3A02G055500	0.430748	-1.21508	3.81477e-26	1.28994e-24	down
TraesCS3B02G602500	5.07878	2.34448	0.0123173	0.0440567	up		TraesCS3A02G056600	0.320258	-1.64269	0.00753523	0.0290303	down
TraesCS3B02G610800	2.07197	1.05101	0.000783559	0.00398355	up		TraesCS3A02G059600	0.499981	-1.00005	1.24264e-19	3.06222e-18	down
TraesCS3B02G612200	3.4976	1.80636	1.27402e-16	2.63561e-15	up		TraesCS3A02G060300	0.201001	-2.31472	5.31882e-50	3.84146e-48	down
TraesCS3D02G008800	7.85826	2.97421	0.000464194	0.00249	up		TraesCS3A02G068100	0.411896	-1.27965	0.00331569	0.0142309	down
TraesCS3D02G014200	2.39425	1.25957	2.4327e-05	0.000168584	up		TraesCS3A02G068500	0.417233	-1.26108	0.00193749	0.00888183	down
TraesCS3D02G014600	2.63113	1.39568	0.00167284	0.0078116	up		TraesCS3A02G070100	0.402532	-1.31282	0.000364753	0.00200512	down
TraesCS3D02G016000	11.716	3.55041	0.0103611	0.0380289	up		TraesCS3A02G073200	0.206708	-2.27433	0.00630844	0.024929	down
TraesCS3D02G023100	2.67348	1.41872	0.00588969	0.0234791	up		TraesCS3A02G074600	0.379976	-1.39602	5.87184e-68	6.39128e-66	down
TraesCS3D02G025000	2.59556	1.37604	1.44823e-06	1.21191e-05	up		TraesCS3A02G075400	0.459884	-1.12066	2.05254e-07	1.90869e-06	down
TraesCS3D02G025100	2.12478	1.08731	8.51036e-15	1.55624e-13	up		TraesCS3A02G075900	0.261603	-1.93455	1.7577e-08	1.86155e-07	down
TraesCS3D02G025200	2.78645	1.47843	1.15902e-08	1.2538e-07	up		TraesCS3A02G077800	0.0222306	-5.49131	1.63994e-06	1.36253e-05	down
TraesCS3D02G032100	2.10952	1.07691	4.92277e-12	7.3504e-11	up		TraesCS3A02G081300	0.09883	-3.33891	6.7751e-175	3.50751e-172	down
TraesCS3D02G036800	3.87288	1.95341	6.10937e-06	4.66857e-05	up		TraesCS3A02G083000	0.345408	-1.53363	3.17115e-06	2.53162e-05	down
TraesCS3D02G036900	3.06745	1.61704	5.52907e-20	1.39033e-18	up		TraesCS3A02G083400	0.149203	-2.74465	2.38089e-17	5.15027e-16	down
TraesCS3D02G037000	2.60683	1.38229	0.00039566	0.00215915	up		TraesCS3A02G093000	0.117245	-3.0924	2.56142e-11	3.59457e-10	down
TraesCS3D02G042300	2.07998	1.05657	0.01296	0.0459819	up		TraesCS3A02G094500	0.0330545	-4.91901	3.53337e-35	1.63424e-33	down
TraesCS3D02G048554	3.68839	1.88299	4.77585e-05	0.000314478	up		TraesCS3A02G099400	0.0205563	-5.60428	0.000321046	0.00178556	down
TraesCS3D02G048800	2.74324	1.45588	4.19324e-09	4.77599e-08	up		TraesCS3A02G102000	0.0477373	-4.38874	1.47384e-133	4.82972e-131	down
TraesCS3D02G048900	2.38153	1.25189	0.00174751	0.00811661	up		TraesCS3A02G104900	0.275098	-1.86198	4.01429e-05	0.000268008	down
TraesCS3D02G049000	3.33981	1.73976	2.34618e-07	2.16768e-06	up		TraesCS3A02G105300	0.271868	-1.87902	1.60428e-63	1.61759e-61	down
TraesCS3D02G049500	3.59327	1.8453	3.04276e-09	3.52095e-08	up		TraesCS3A02G107200	0.495695	-1.01248	2.50979e-05	0.000173731	down
TraesCS3D02G056200	2.37937	1.25058	1.75067e-23	5.23052e-22	up		TraesCS3A02G108200	0.388137	-1.36536	0.0104319	0.0382638	down
TraesCS3D02G060400	2.56509	1.35901	0.00790698	0.0302713	up		TraesCS3A02G108300	0.049234	-4.3442	0.000790519	0.0040143	down
TraesCS3D02G061500	2.29032	1.19555	1.48677e-22	4.27615e-21	up		TraesCS3A02G108700	0.471815	-1.08371	2.5078e-15	4.75524e-14	down
TraesCS3D02G061700	3.7285	1.89859	2.32517e-42	1.3721e-40	up		TraesCS3A02G109100	0.334003	-1.58207	2.39952e-28	8.85192e-27	down
TraesCS3D02G061900	8.11701	3.02095	8.16033e-254	9.48554e-251	up		TraesCS3A02G111200	0.342419	-1.54617	1.45345e-06	1.21612e-05	down
TraesCS3D02G066300	2.91452	1.54326	0.0104174	0.0382198	up		TraesCS3A02G111700	0.186348	-2.42393	3.44984e-10	4.37314e-09	down
TraesCS3D02G069300	2.48637	1.31404	0.00713174	0.0277377	up		TraesCS3A02G117000	0.247078	-2.01696	0.000213103	0.00122985	down
TraesCS3D02G072000	2.51007	1.32772	2.21483e-08	2.31427e-07	up		TraesCS3A02G118300	0.23436	-2.0932	2.33128e-162	1.07181e-159	down
TraesCS3D02G072300	5.29115	2.40358	0.0031633	0.0136831	up		TraesCS3A02G125200	0.23556	-2.08584	6.54611e-61	6.2525e-59	down
TraesCS3D02G076100	3.21259	1.68374	2.05576e-08	2.15793e-07	up		TraesCS3A02G125800	0.194409	-2.36283	0.00307282	0.0133447	down
TraesCS3D02G076300	43.5456	5.44445	1.40987e-29	5.49039e-28	up		TraesCS3A02G127300	0.151268	-2.72482	1.21578e-59	1.1383e-57	down
TraesCS3D02G077500	5.61446	2.48915	1.06681e-07	1.03055e-06	up		TraesCS3A02G129800	0.222751	-2.1665	3.53832e-18	8.0825e-17	down
TraesCS3D02G078900	8.1009	3.01808	1.05816e-141	3.7682e-139	up		TraesCS3A02G130300	0.105685	-3.24216	1.15251e-122	3.2274e-120	down
TraesCS3D02G079700	103.026	6.68687	4.35693e-07	3.8918e-06	up		TraesCS3A02G131200	0.222481	-2.16825	1.11173e-07	1.07033e-06	down
TraesCS3D02G080000	4.40377	2.13874	0.000649572	0.00336626	up		TraesCS3A02G132000	0.451647	-1.14673	3.34417e-06	2.66078e-05	down
TraesCS3D02G084900	2.642	1.40163	1.30114e-29	5.07658e-28	up		TraesCS3A02G133700	0.407219	-1.29612	0.0003862	0.00211246	down
TraesCS3D02G087500	3.41809	1.77319	2.48921e-14	4.41557e-13	up		TraesCS3A02G135800	0.422833	-1.24184	2.57003e-64	2.62573e-62	down
TraesCS3D02G090200	2.14452	1.10065	6.87385e-23	1.99659e-21	up		TraesCS3A02G137000	0.431577	-1.21231	7.83409e-11	1.05425e-09	down
TraesCS3D02G092900	2.1465	1.10199	2.76399e-33	1.20596e-31	up		TraesCS3A02G139300	0.330891	-1.59557	4.02083e-41	2.27676e-39	down
TraesCS3D02G097000	3.07959	1.62274	1.31224e-15	2.53984e-14	up		TraesCS3A02G143800	0.373183	-1.42204	0.000522055	0.00276617	down
TraesCS3D02G097900	2.66554	1.41443	0.00432042	0.0179153	up		TraesCS3A02G146500	0.368407	-1.44063	2.76027e-30	1.10066e-28	down
TraesCS3D02G098400	2.49286	1.3178	9.32112e-56	7.83419e-54	up		TraesCS3A02G146600	0.418581	-1.25642	0.00718267	0.0278918	down
TraesCS3D02G100600	2.02297	1.01648	3.35207e-15	6.30376e-14	up		TraesCS3A02G148100	0.0226557	-5.46398	0.000571795	0.0030003	down
TraesCS3D02G101700	5.27854	2.40014	0.000966479	0.00479905	up		TraesCS3A02G148800	0.449069	-1.15499	9.68494e-36	4.60031e-34	down
TraesCS3D02G101800	2.79622	1.48348	0.000236191	0.00134857	up		TraesCS3A02G153500	0.35187	-1.50688	1.46794e-44	9.13491e-43	down
TraesCS3D02G104000	4.1604	2.05672	6.93102e-08	6.8342e-07	up		TraesCS3A02G155400	0.325188	-1.62066	1.43463e-28	5.34362e-27	down
TraesCS3D02G104600	7.45394	2.898	5.9894e-05	0.000387065	up		TraesCS3A02G157300	0.197607	-2.3393	7.15029e-05	0.000456219	down
TraesCS3D02G105000	2.04962	1.03536	1.42497e-07	1.35017e-06	up		TraesCS3A02G165200	0.359943	-1.47416	4.40882e-05	0.000292215	down
TraesCS3D02G108500	4.77779	2.25634	2.0946e-05	0.000146639	up		TraesCS3A02G166300	0.21412	-2.22351	3.18414e-105	7.10744e-103	down
TraesCS3D02G108600	4.75355	2.249	0.0112267	0.0407257	up		TraesCS3A02G166400	0.023161	-5.43216	8.28879e-42	4.8311e-40	down
TraesCS3D02G109100	4.37399	2.12895	4.77991e-36	2.29522e-34	up		TraesCS3A02G166500	0.123683	-3.01528	2.20446e-136	7.50333e-134	down
TraesCS3D02G109800	2.421	1.2756	0.00143732	0.00685045	up		TraesCS3A02G167200	0.496161	-1.01112	1.88903e-56	1.62538e-54	down
TraesCS3D02G119500	2.26669	1.18059	0.00424185	0.017637	up		TraesCS3A02G175400	0.308935	-1.69462	2.06653e-18	4.77722e-17	down
TraesCS3D02G124000	2.05916	1.04206	0.000279269	0.00157166	up		TraesCS3A02G175700	0.462873	-1.11131	1.31157e-07	1.24906e-06	down
TraesCS3D02G127800	7.34559	2.87688	0.000137804	0.000829801	up		TraesCS3A02G177700	0.158684	-2.65577	4.72866e-06	3.6778e-05	down
TraesCS3D02G131900	2.02347	1.01683	7.29502e-05	0.000464714	up		TraesCS3A02G183100	0.106134	-3.23604	1.64486e-33	7.22786e-32	down
TraesCS3D02G136900	4.16565	2.05854	0.000147862	0.000884399	up		TraesCS3A02G183600	0.463474	-1.10944	1.94415e-21	5.33749e-20	down
TraesCS3D02G140700	2.37816	1.24984	6.23144e-24	1.909e-22	up		TraesCS3A02G183800	0.35192	-1.50668	5.62658e-07	4.95266e-06	down
TraesCS3D02G142400	24.489	4.61406	0.00151935	0.00718526	up		TraesCS3A02G185900	0.160881	-2.63594	5.56458e-13	8.95785e-12	down
TraesCS3D02G145900	4.17527	2.06187	0.00606536	0.0240797	up		TraesCS3A02G189500	0.214018	-2.22419	0.00229439	0.0102898	down
TraesCS3D02G146400	2.31498	1.211	8.00443e-14	1.37477e-12	up		TraesCS3A02G191700	0.435449	-1.19943	8.57979e-72	1.01066e-69	down
TraesCS3D02G149600	5.41494	2.43695	2.90889e-52	2.21245e-50	up		TraesCS3A02G198600	0.468575	-1.09365	1.58691e-07	1.49602e-06	down
TraesCS3D02G151500	10.3831	3.37617	3.59584e-08	3.66284e-07	up		TraesCS3A02G199600	0.319649	-1.64544	1.50467e-76	1.9765e-74	down
TraesCS3D02G158600	2.2875	1.19377	9.28701e-38	4.71677e-36	up		TraesCS3A02G205000	0.467448	-1.09712	1.31406e-06	1.10564e-05	down
TraesCS3D02G164500	2.16961	1.11744	2.31666e-51	1.7237e-49	up		TraesCS3A02G205800	0.284889	-1.81153	1.63589e-05	0.000116538	down
TraesCS3D02G165500	2.7214	1.44435	0.000758974	0.00387134	up		TraesCS3A02G206400	0.450037	-1.15188	7.95099e-49	5.56633e-47	down
TraesCS3D02G169000	2.09871	1.0695	5.09666e-05	0.000333819	up		TraesCS3A02G209100	0.49572	-1.0124	3.25609e-33	1.41766e-31	down
TraesCS3D02G171100	3.18101	1.66948	0.00881005	0.0331396	up		TraesCS3A02G209800	0.365739	-1.45111	3.02386e-06	2.4234e-05	down
TraesCS3D02G172700	2.10128	1.07127	0.00078582	0.0039934	up		TraesCS3A02G210600	0.382223	-1.38751	2.65078e-10	3.40861e-09	down
TraesCS3D02G175600	2.35901	1.23818	3.38379e-15	6.36146e-14	up		TraesCS3A02G216800	0.338908	-1.56104	1.91904e-06	1.57888e-05	down
TraesCS3D02G175900	2.64826	1.40504	6.14641e-10	7.61895e-09	up		TraesCS3A02G217700	0.471751	-1.0839	0.0026752	0.0117815	down
TraesCS3D02G178000	2.27151	1.18365	0.0059663	0.0237338	up		TraesCS3A02G226100	0.324702	-1.62281	2.42069e-25	7.86973e-24	down
TraesCS3D02G179800	2.2259	1.15439	2.31531e-39	1.2425e-37	up		TraesCS3A02G229700	0.400236	-1.32108	6.40244e-28	2.32294e-26	down
TraesCS3D02G185500	2.33336	1.22241	1.00786e-08	1.09721e-07	up		TraesCS3A02G229900	0.255089	-1.97093	3.65374e-20	9.28232e-19	down
TraesCS3D02G190400	3.02554	1.59719	0.0117798	0.0424025	up		TraesCS3A02G230000	0.23834	-2.06891	0	0	down
TraesCS3D02G193600	2.02283	1.01637	0.00147013	0.00698251	up		TraesCS3A02G230100	0.217982	-2.19772	0.000124698	0.000757767	down
TraesCS3D02G195100	2.07201	1.05103	4.37199e-12	6.55341e-11	up		TraesCS3A02G232400	0.0641959	-3.96138	9.11339e-08	8.87806e-07	down
TraesCS3D02G200800	2.30682	1.20591	2.19554e-32	9.32831e-31	up		TraesCS3A02G236200	0.457577	-1.12791	1.72835e-06	1.43135e-05	down
TraesCS3D02G201000	2.05547	1.03947	0.000331438	0.00183827	up		TraesCS3A02G244400	0.257204	-1.95901	6.84107e-42	3.99486e-40	down
TraesCS3D02G203200	4.88836	2.28935	1.0711e-22	3.0951e-21	up		TraesCS3A02G246700	0.0728804	-3.77833	1.80226e-244	1.91434e-241	down
TraesCS3D02G203300	2.28366	1.19134	7.26094e-12	1.06837e-10	up		TraesCS3A02G250700	0.21837	-2.19515	1.94845e-29	7.52119e-28	down
TraesCS3D02G212100	2.01986	1.01426	2.35587e-14	4.18507e-13	up		TraesCS3A02G251500	0.470767	-1.08691	5.50903e-16	1.09765e-14	down
TraesCS3D02G213900	3.17485	1.66669	2.691e-06	2.16967e-05	up		TraesCS3A02G252900	0.18951	-2.39966	4.98829e-50	3.60696e-48	down
TraesCS3D02G217400	3.13827	1.64997	7.00783e-06	5.30708e-05	up		TraesCS3A02G253700	0.0634174	-3.97898	3.41523e-19	8.24136e-18	down
TraesCS3D02G217800	6.61552	2.72586	1.02524e-10	1.36685e-09	up		TraesCS3A02G256400	0.366522	-1.44803	4.01254e-73	4.89506e-71	down
TraesCS3D02G219100	4.47688	2.16249	6.88946e-32	2.87755e-30	up		TraesCS3A02G259700	0.482224	-1.05222	6.0082e-17	1.26806e-15	down
TraesCS3D02G222200	4.37091	2.12794	7.93897e-11	1.06789e-09	up		TraesCS3A02G259900	0.411191	-1.28212	1.64554e-15	3.15914e-14	down
TraesCS3D02G222400	3.10162	1.63302	0.000949103	0.00472189	up		TraesCS3A02G260200	0.0403564	-4.63106	0.010772	0.039331	down
TraesCS3D02G224600	6.5955	2.72148	0.00209906	0.0095135	up		TraesCS3A02G268100	0.0421398	-4.56867	0.00324184	0.0139593	down
TraesCS3D02G226300	20.5895	4.36383	1.07785e-17	2.38775e-16	up		TraesCS3A02G274400	0.0521519	-4.26114	1.21456e-09	1.46086e-08	down
TraesCS3D02G227900	2.25665	1.17418	0.000124384	0.000756012	up		TraesCS3A02G276100	0.27127	-1.8822	1.12884e-19	2.79182e-18	down
TraesCS3D02G229400	2.32003	1.21414	1.51341e-29	5.88245e-28	up		TraesCS3A02G279800	0.421873	-1.24512	3.8518e-99	7.67954e-97	down
TraesCS3D02G238000	4.0635	2.02272	2.53373e-07	2.33048e-06	up		TraesCS3A02G280000	0.0719361	-3.79714	2.32985e-38	1.20314e-36	down
TraesCS3D02G238400	2.20996	1.14402	3.16033e-09	3.65014e-08	up		TraesCS3A02G281500	0.348805	-1.51951	0.000262183	0.00148341	down
TraesCS3D02G239500	3.47735	1.79799	2.8663e-07	2.62072e-06	up		TraesCS3A02G289200	0.34315	-1.54309	1.05879e-15	2.06289e-14	down
TraesCS3D02G249000	3.15772	1.65888	3.81548e-25	1.22875e-23	up		TraesCS3A02G289300	0.45749	-1.12819	3.38142e-20	8.60823e-19	down
TraesCS3D02G249200	3.17773	1.668	6.18203e-12	9.1618e-11	up		TraesCS3A02G290500	0.301925	-1.72774	0.000479787	0.00256506	down
TraesCS3D02G252900	2.4822	1.31162	3.26979e-18	7.49134e-17	up		TraesCS3A02G291400	0.0991229	-3.33464	1.0055e-09	1.22158e-08	down
TraesCS3D02G254100	49.4122	5.62679	0.000134629	0.00081219	up		TraesCS3A02G293400	0.073567	-3.7648	7.18533e-08	7.07135e-07	down
TraesCS3D02G257900	2.33468	1.22322	5.38005e-28	1.96007e-26	up		TraesCS3A02G293500	0.242326	-2.04498	2.8102e-09	3.26295e-08	down
TraesCS3D02G259000	2.53744	1.34337	0.0109886	0.0399986	up		TraesCS3A02G301100	0.402619	-1.31251	5.10026e-76	6.58725e-74	down
TraesCS3D02G264100	2.77977	1.47497	0.0108736	0.0396386	up		TraesCS3A02G301900	0.42935	-1.21978	1.30685e-06	1.09973e-05	down
TraesCS3D02G271600	2.01807	1.01298	1.47786e-09	1.76379e-08	up		TraesCS3A02G302100	0.165886	-2.59173	3.1723e-283	4.15821e-280	down
TraesCS3D02G276600	2.57021	1.36188	4.23409e-108	9.99424e-106	up		TraesCS3A02G306800	0.183982	-2.44236	0.00500765	0.0203985	down
TraesCS3D02G277000	2.49094	1.31669	2.03487e-13	3.38542e-12	up		TraesCS3A02G307100	0.405473	-1.30232	3.63051e-06	2.87265e-05	down
TraesCS3D02G283600	5.50401	2.46048	1.86852e-12	2.89013e-11	up		TraesCS3A02G310200	0.427308	-1.22665	2.92917e-10	3.74859e-09	down
TraesCS3D02G288800	25.2837	4.66014	0.00658366	0.0258624	up		TraesCS3A02G313200	0.448955	-1.15536	5.30699e-37	2.63243e-35	down
TraesCS3D02G303300	4.19037	2.06708	9.75238e-06	7.21093e-05	up		TraesCS3A02G316800	0.373969	-1.41901	4.4641e-07	3.98118e-06	down
TraesCS3D02G306600	2.18325	1.12648	4.64652e-05	0.000306716	up		TraesCS3A02G317100	0.287582	-1.79795	2.03377e-08	2.13703e-07	down
TraesCS3D02G312500	37.442	5.22659	0.000829517	0.00418611	up		TraesCS3A02G318900	0.449951	-1.15216	0.0040993	0.0171148	down
TraesCS3D02G316400	2.45844	1.29774	3.30627e-10	4.20255e-09	up		TraesCS3A02G320500	0.316058	-1.66174	1.9184e-08	2.02167e-07	down
TraesCS3D02G316700	2.09193	1.06483	9.83484e-08	9.54315e-07	up		TraesCS3A02G321000	0.356115	-1.48959	3.2759e-22	9.29183e-21	down
TraesCS3D02G320500	4.38504	2.13259	1.28651e-33	5.68974e-32	up		TraesCS3A02G325300	0.0185078	-5.75573	0.000158505	0.000940753	down
TraesCS3D02G323800	3.31817	1.73039	2.88625e-06	2.31799e-05	up		TraesCS3A02G325400	0.311646	-1.68202	5.45376e-05	0.000355132	down
TraesCS3D02G327500	2.29282	1.19712	9.65201e-20	2.39867e-18	up		TraesCS3A02G327000	0.412838	-1.27635	2.52738e-10	3.25741e-09	down
TraesCS3D02G328400	4.40061	2.1377	0.00125964	0.00609165	up		TraesCS3A02G328100	0.0460093	-4.44193	3.90942e-09	4.46842e-08	down
TraesCS3D02G331000	4.56362	2.19018	0.0112948	0.0409416	up		TraesCS3A02G330600	0.443263	-1.17377	8.21481e-10	1.00514e-08	down
TraesCS3D02G331500	2.09741	1.06861	1.49517e-06	1.24764e-05	up		TraesCS3A02G331500	0.418438	-1.25691	3.07757e-05	0.000209665	down
TraesCS3D02G334300	9.00016	3.16995	0.000186266	0.00108926	up		TraesCS3A02G334100	0.203733	-2.29525	7.2694e-10	8.94082e-09	down
TraesCS3D02G334400	3.97703	1.99169	7.74665e-08	7.59465e-07	up		TraesCS3A02G336000	0.46416	-1.10731	0.000177202	0.00104099	down
TraesCS3D02G339400	31.1503	4.96118	0.00359798	0.0152767	up		TraesCS3A02G338000	0.484896	-1.04425	0.0122463	0.0438356	down
TraesCS3D02G340100	2.73191	1.44991	0.001856	0.0085541	up		TraesCS3A02G338900	0.372247	-1.42567	4.55399e-06	3.55092e-05	down
TraesCS3D02G340500	3.89093	1.96011	1.34334e-06	1.12889e-05	up		TraesCS3A02G344600	0.254076	-1.97667	4.79036e-12	7.1631e-11	down
TraesCS3D02G345500	2.87925	1.52569	2.7948e-08	2.88698e-07	up		TraesCS3A02G346700	0.0119328	-6.38892	5.20509e-09	5.86126e-08	down
TraesCS3D02G345600	9.34777	3.22462	1.29674e-13	2.18812e-12	up		TraesCS3A02G347800	0.2178	-2.19892	0.00157392	0.00740302	down
TraesCS3D02G347500	27.0224	4.75608	0.00563484	0.0226109	up		TraesCS3A02G351600	0.188992	-2.4036	7.7763e-06	5.84522e-05	down
TraesCS3D02G348100	5.01776	2.32704	7.58577e-05	0.000481195	up		TraesCS3A02G354300	0.289941	-1.78617	0.0105837	0.0387283	down
TraesCS3D02G349100	6.31397	2.65855	1.14531e-15	2.22514e-14	up		TraesCS3A02G354500	0.349398	-1.51706	0.000293723	0.00164578	down
TraesCS3D02G351000	2.5196	1.33319	1.5237e-05	0.000109139	up		TraesCS3A02G356600	0.259261	-1.94752	1.90696e-07	1.7819e-06	down
TraesCS3D02G351400	2.47406	1.30688	0.0104538	0.038332	up		TraesCS3A02G363700	0.0202075	-5.62897	0	0	down
TraesCS3D02G354000	2.13043	1.09115	0.000252489	0.00143312	up		TraesCS3A02G364200	0.458259	-1.12577	4.2082e-26	1.42057e-24	down
TraesCS3D02G355900	2.67653	1.42036	1.2343e-47	8.43034e-46	up		TraesCS3A02G364300	0.261194	-1.93681	3.44255e-05	0.000232371	down
TraesCS3D02G361500	3.07065	1.61854	2.40628e-07	2.21921e-06	up		TraesCS3A02G365100	0.437945	-1.19118	1.27132e-18	2.9735e-17	down
TraesCS3D02G375800	2.04272	1.03049	0.000132497	0.000800507	up		TraesCS3A02G366000	0.0610679	-4.03344	1.69835e-05	0.000120695	down
TraesCS3D02G377300	2.51333	1.3296	2.50963e-08	2.60858e-07	up		TraesCS3A02G366400	0.363832	-1.45865	6.30828e-42	3.68723e-40	down
TraesCS3D02G378500	2.18971	1.13074	0.00149973	0.00710394	up		TraesCS3A02G368800	0.28684	-1.80168	1.50426e-10	1.9802e-09	down
TraesCS3D02G379700	2.47602	1.30802	4.31937e-05	0.000286534	up		TraesCS3A02G369900	0.470123	-1.08889	1.7671e-13	2.9535e-12	down
TraesCS3D02G380000	6.08921	2.60626	0.0028103	0.0123183	up		TraesCS3A02G372400	0.419212	-1.25425	2.82542e-08	2.91567e-07	down
TraesCS3D02G381500	12.833	3.68178	7.6713e-07	6.64425e-06	up		TraesCS3A02G373800	0.425146	-1.23397	2.18377e-06	1.78264e-05	down
TraesCS3D02G384700	2.71404	1.44044	0.012435	0.044426	up		TraesCS3A02G374000	0.484207	-1.0463	7.27878e-38	3.70905e-36	down
TraesCS3D02G385200	7.69339	2.94362	0.000488727	0.00260718	up		TraesCS3A02G374800	0.198807	-2.33056	0.00215539	0.00974298	down
TraesCS3D02G390600	4.08965	2.03198	5.13969e-25	1.64489e-23	up		TraesCS3A02G375100	0.496602	-1.00984	3.70707e-24	1.14649e-22	down
TraesCS3D02G390700	2.05424	1.03861	3.09207e-05	0.000210536	up		TraesCS3A02G376100	0.295828	-1.75717	1.48104e-06	1.23668e-05	down
TraesCS3D02G390800	2.10456	1.07352	0.01303	0.0461728	up		TraesCS3A02G376700	0.0395941	-4.65857	0.0109032	0.0397253	down
TraesCS3D02G390900	2.55404	1.35278	1.63704e-06	1.36049e-05	up		TraesCS3A02G377400	0.0376025	-4.73303	0.0015578	0.0073423	down
TraesCS3D02G395000	3.25727	1.70366	4.16648e-07	3.73088e-06	up		TraesCS3A02G378700	0.362621	-1.46347	9.36704e-05	0.000585091	down
TraesCS3D02G395800	2.82459	1.49804	0.00022736	0.00130395	up		TraesCS3A02G379900	0.269366	-1.89236	0.00357052	0.0151766	down
TraesCS3D02G396100	2.04166	1.02974	0.0064425	0.0253742	up		TraesCS3A02G381400	0.121277	-3.04362	0.00335538	0.0143857	down
TraesCS3D02G396800	2.05532	1.03936	1.16212e-11	1.68141e-10	up		TraesCS3A02G382400	0.236836	-2.07804	0.000940316	0.00468311	down
TraesCS3D02G397700	2.37483	1.24782	0.00665297	0.026098	up		TraesCS3A02G382900	0.241785	-2.0482	1.17078e-09	1.41068e-08	down
TraesCS3D02G401300	2.36209	1.24006	5.73252e-06	4.40353e-05	up		TraesCS3A02G383500	0.367809	-1.44297	3.06334e-29	1.17311e-27	down
TraesCS3D02G412700	2.81075	1.49095	1.97067e-47	1.33268e-45	up		TraesCS3A02G386300	0.03048	-5.03599	0.00052459	0.00277745	down
TraesCS3D02G417700	2.80199	1.48645	0.00326726	0.0140504	up		TraesCS3A02G388100	0.170018	-2.55624	9.30228e-14	1.5897e-12	down
TraesCS3D02G424000	3.06469	1.61574	1.99681e-14	3.56262e-13	up		TraesCS3A02G392900	0.261118	-1.93723	0.00746894	0.0288214	down
TraesCS3D02G425900	2.23758	1.16194	0.0136632	0.0480971	up		TraesCS3A02G398500	0.34684	-1.52766	2.92095e-120	7.96244e-118	down
TraesCS3D02G431500	2.1219	1.08536	6.00651e-05	0.00038813	up		TraesCS3A02G401400	0.388303	-1.36475	0.0129282	0.0458741	down
TraesCS3D02G435700	2.60806	1.38298	0.000577195	0.00302477	up		TraesCS3A02G403700	0.438496	-1.18936	0.000185279	0.00108379	down
TraesCS3D02G435800	5.738	2.52055	8.96172e-08	8.73722e-07	up		TraesCS3A02G404400	0.0839121	-3.57498	2.00135e-91	3.55324e-89	down
TraesCS3D02G436000	3.0889	1.62709	0.000285569	0.00160462	up		TraesCS3A02G407700	0.205975	-2.27946	1.07683e-15	2.09738e-14	down
TraesCS3D02G436900	2.3205	1.21443	1.49201e-08	1.59221e-07	up		TraesCS3A02G413600	0.252226	-1.98721	3.28337e-40	1.80123e-38	down
TraesCS3D02G437000	2.53044	1.33939	5.74945e-07	5.05648e-06	up		TraesCS3A02G413700	0.386475	-1.37155	1.90526e-30	7.63678e-29	down
TraesCS3D02G437300	3.95306	1.98297	1.94241e-07	1.81336e-06	up		TraesCS3A02G414900	0.371438	-1.42881	5.18733e-08	5.19383e-07	down
TraesCS3D02G437400	2.00376	1.00271	0.0031749	0.0137261	up		TraesCS3A02G415900	0.456594	-1.13102	0.00238345	0.0106373	down
TraesCS3D02G437900	14.2383	3.83171	0.00331641	0.014233	up		TraesCS3A02G416800	0.394553	-1.34171	0.000354896	0.00195706	down
TraesCS3D02G438500	4.31706	2.11005	0.000102479	0.000634835	up		TraesCS3A02G418400	0.430313	-1.21654	6.41669e-18	1.44012e-16	down
TraesCS3D02G438600	4.23606	2.08272	2.14689e-83	3.33157e-81	up		TraesCS3A02G418700	0.0166179	-5.91112	1.54551e-34	7.03209e-33	down
TraesCS3D02G438700	3.75652	1.9094	1.51996e-24	4.78976e-23	up		TraesCS3A02G420300	0.229161	-2.12557	0.00233608	0.0104524	down
TraesCS3D02G439200	2.36608	1.2425	6.87878e-34	3.06865e-32	up		TraesCS3A02G420900	0.0726163	-3.78356	0.000105005	0.000648632	down
TraesCS3D02G439500	9.07765	3.18232	2.07989e-14	3.70657e-13	up		TraesCS3A02G423100	0.453025	-1.14234	5.89865e-05	0.000381681	down
TraesCS3D02G439700	5.9266	2.5672	0.00176841	0.00820355	up		TraesCS3A02G424800	0.382795	-1.38536	2.4004e-06	1.95043e-05	down
TraesCS3D02G441900	2.39214	1.2583	0.00206121	0.00936811	up		TraesCS3A02G426500	0.480612	-1.05706	2.67391e-14	4.73366e-13	down
TraesCS3D02G449300	4.86068	2.28116	1.88945e-55	1.56246e-53	up		TraesCS3A02G432500	0.403716	-1.30859	2.70884e-05	0.000186441	down
TraesCS3D02G451000	2.00929	1.00669	1.95225e-15	3.7259e-14	up		TraesCS3A02G433000	0.4116	-1.28068	2.08024e-44	1.29191e-42	down
TraesCS3D02G463600	3.94315	1.97935	6.29417e-08	6.23516e-07	up		TraesCS3A02G436100	0.383558	-1.38248	3.49478e-12	5.27832e-11	down
TraesCS3D02G464600	4.71546	2.2374	0.000397249	0.00216578	up		TraesCS3A02G437400	0.0413316	-4.59661	1.41801e-81	2.11523e-79	down
TraesCS3D02G470600	2.28972	1.19517	5.22008e-05	0.00034126	up		TraesCS3A02G437600	0.0283113	-5.14248	1.43854e-07	1.3624e-06	down
TraesCS3D02G472000	2.65045	1.40624	7.75361e-07	6.71271e-06	up		TraesCS3A02G437900	0.286031	-1.80576	0.000535743	0.00283066	down
TraesCS3D02G486100	3.47949	1.79888	4.31637e-19	1.0335e-17	up		TraesCS3A02G438800	0.199793	-2.32343	2.20073e-82	3.31492e-80	down
TraesCS3D02G495800	9.31321	3.21928	1.21467e-32	5.19308e-31	up		TraesCS3A02G445300	0.32803	-1.6081	1.88059e-09	2.22119e-08	down
TraesCS3D02G500800	2.02198	1.01577	5.21042e-12	7.76859e-11	up		TraesCS3A02G447500	0.139214	-2.84463	1.14573e-176	6.24645e-174	down
TraesCS3D02G501400	10.8998	3.44623	9.66063e-10	1.17459e-08	up		TraesCS3A02G447600	0.470345	-1.08821	5.30672e-13	8.56738e-12	down
TraesCS3D02G501500	3.19804	1.67719	1.6664e-16	3.42436e-15	up		TraesCS3A02G459600	0.399193	-1.32484	1.6854e-13	2.8223e-12	down
TraesCS3D02G501600	3.62072	1.85628	2.49942e-09	2.91412e-08	up		TraesCS3A02G470600	0.490319	-1.02821	5.44963e-06	4.19774e-05	down
TraesCS3D02G501900	2.22309	1.15257	3.23645e-10	4.11873e-09	up		TraesCS3A02G471900	0.275276	-1.86105	1.41572e-07	1.34202e-06	down
TraesCS3D02G513200	3.26159	1.70557	0.00249607	0.0110749	up		TraesCS3A02G480200	0.0205907	-5.60186	0.000314113	0.00175017	down
TraesCS3D02G514300	4.95529	2.30897	0.000610816	0.00318148	up		TraesCS3A02G480300	0.0128646	-6.28045	1.3371e-06	1.12381e-05	down
TraesCS3D02G514400	7.62118	2.93001	4.672e-29	1.77343e-27	up		TraesCS3A02G480400	0.277856	-1.84759	5.14873e-15	9.55702e-14	down
TraesCS3D02G517300	3.74058	1.90326	1.54346e-10	2.02833e-09	up		TraesCS3A02G480700	0.378861	-1.40026	6.16491e-08	6.11597e-07	down
TraesCS3D02G517400	6.44361	2.68787	1.74851e-45	1.12348e-43	up		TraesCS3A02G480900	0.223104	-2.16421	3.83605e-05	0.00025685	down
TraesCS3D02G517500	2.51643	1.33138	4.55772e-05	0.000301339	up		TraesCS3A02G481000	0.290734	-1.78223	1.79858e-09	2.12801e-08	down
TraesCS3D02G517600	2.56932	1.36138	0.00175224	0.00813673	up		TraesCS3A02G481500	0.118107	-3.08183	1.1933e-15	2.31619e-14	down
TraesCS3D02G517700	2.34557	1.22994	0.000416592	0.00226044	up		TraesCS3A02G483000	0.0316012	-4.98388	6.45673e-25	2.05784e-23	down
TraesCS3D02G518100	3.73628	1.9016	0.00167012	0.0078014	up		TraesCS3A02G484600	0.312331	-1.67885	0.000148143	0.000885994	down
TraesCS3D02G527000	2.36808	1.24372	6.97015e-17	1.46556e-15	up		TraesCS3A02G489100	0.363224	-1.46107	2.82871e-35	1.31523e-33	down
TraesCS3D02G527200	3.017	1.59311	2.86832e-07	2.62218e-06	up		TraesCS3A02G489300	0.404295	-1.30652	2.74468e-12	4.1844e-11	down
TraesCS3D02G527300	2.50495	1.32478	7.38058e-05	0.000469533	up		TraesCS3A02G492500	0.388154	-1.3653	9.06289e-05	0.000567705	down
TraesCS3D02G534200	2.49581	1.31951	2.95022e-29	1.13243e-27	up		TraesCS3A02G492900	0.259681	-1.94519	1.11632e-62	1.10391e-60	down
TraesCS3D02G534800	70.2232	6.13388	8.90096e-06	6.63796e-05	up		TraesCS3A02G501200	0.331193	-1.59426	1.64362e-09	1.95216e-08	down
TraesCS3D02G535000	3.13832	1.64999	0.0104845	0.0384246	up		TraesCS3A02G502300	0.467226	-1.09781	1.26781e-17	2.79049e-16	down
TraesCS3D02G536600	16.9361	4.08203	2.17263e-40	1.20044e-38	up		TraesCS3A02G508600	0.418106	-1.25806	0.00303788	0.0132143	down
TraesCS3D02G536700	3.89991	1.96344	7.38137e-16	1.45611e-14	up		TraesCS3A02G511800	0.347771	-1.52379	1.50637e-10	1.98251e-09	down
TraesCS3D02G540600	2.57871	1.36665	3.90476e-06	3.07544e-05	up		TraesCS3A02G512400	0.0610217	-4.03453	3.02731e-22	8.59066e-21	down
TraesCS4A02G007400	2.12981	1.09072	0.00067672	0.00349315	up		TraesCS3A02G517100	0.000624607	-10.6448	4.12981e-19	9.90367e-18	down
TraesCS4A02G007900	2.38015	1.25105	5.31015e-39	2.80328e-37	up		TraesCS3A02G520600	0.384666	-1.37832	2.53633e-05	0.000175411	down
TraesCS4A02G008000	2.20164	1.13858	4.12339e-05	0.000274604	up		TraesCS3A02G526800	0.0273354	-5.19309	1.44511e-05	0.000103933	down
TraesCS4A02G009400	2.20757	1.14246	2.76627e-11	3.87058e-10	up		TraesCS3A02G533800	0.0225977	-5.46768	0.000472758	0.00253146	down
TraesCS4A02G009700	91.1026	6.50942	1.1014e-06	9.35525e-06	up		TraesCS3B02G000200	0.478928	-1.06212	1.20855e-23	3.64439e-22	down
TraesCS4A02G013300	2.09034	1.06374	6.09845e-05	0.000393617	up		TraesCS3B02G006000	0.0418872	-4.57735	1.41278e-13	2.37611e-12	down
TraesCS4A02G017700	2.46175	1.29968	1.33824e-31	5.54437e-30	up		TraesCS3B02G008100	0.442817	-1.17522	0.0088572	0.0332976	down
TraesCS4A02G019800	6.7847	2.76228	4.79849e-13	7.77335e-12	up		TraesCS3B02G010200	0.282676	-1.82278	1.36531e-05	9.85875e-05	down
TraesCS4A02G020000	23.9004	4.57896	0.00734535	0.0284249	up		TraesCS3B02G014800	0.242669	-2.04294	2.38945e-05	0.000165755	down
TraesCS4A02G020900	2.26476	1.17936	7.31755e-07	6.35484e-06	up		TraesCS3B02G017800	0.494894	-1.01481	2.03972e-08	2.14292e-07	down
TraesCS4A02G035400	67.2921	6.07236	2.03617e-51	1.51867e-49	up		TraesCS3B02G022500	0.48705	-1.03786	0.0001114	0.000685345	down
TraesCS4A02G042000	3.07486	1.62052	3.66048e-37	1.82896e-35	up		TraesCS3B02G022900	0.486524	-1.03942	1.18518e-31	4.92349e-30	down
TraesCS4A02G042100	2.00273	1.00197	9.63059e-23	2.78943e-21	up		TraesCS3B02G023000	0.084226	-3.56959	9.00949e-05	0.000564532	down
TraesCS4A02G045900	2.44138	1.2877	1.33759e-13	2.25334e-12	up		TraesCS3B02G026700	0.0078419	-6.99458	1.58138e-07	1.49104e-06	down
TraesCS4A02G058700	2.42816	1.27986	1.10563e-07	1.06513e-06	up		TraesCS3B02G034600	0.210031	-2.25133	6.64581e-08	6.57189e-07	down
TraesCS4A02G059800	13.2465	3.72754	5.42095e-14	9.42082e-13	up		TraesCS3B02G034800	0.198964	-2.32942	0.000157749	0.000937082	down
TraesCS4A02G063200	3.48278	1.80024	0.0115576	0.0417466	up		TraesCS3B02G036100	0.0493621	-4.34045	1.85494e-06	1.53023e-05	down
TraesCS4A02G063600	25.4416	4.66912	0	0	up		TraesCS3B02G040800	0.167172	-2.58059	7.79806e-62	7.51823e-60	down
TraesCS4A02G075900	2.11677	1.08187	9.56293e-07	8.19165e-06	up		TraesCS3B02G047300	0.426776	-1.22845	1.77284e-13	2.96147e-12	down
TraesCS4A02G078000	2.05811	1.04132	2.34678e-26	8.05001e-25	up		TraesCS3B02G054200	0.2635	-1.92413	0.00056731	0.00297982	down
TraesCS4A02G094300	5.8903	2.55834	1.70808e-106	3.89739e-104	up		TraesCS3B02G054400	0.30401	-1.71781	0.000354785	0.00195696	down
TraesCS4A02G094500	2.35572	1.23617	9.54464e-16	1.86969e-14	up		TraesCS3B02G062800	0.407585	-1.29483	1.83874e-05	0.000129997	down
TraesCS4A02G096700	2.44173	1.2879	1.77838e-67	1.92211e-65	up		TraesCS3B02G068700	0.237274	-2.07538	0.00704194	0.0274382	down
TraesCS4A02G102500	3.49085	1.80358	9.99652e-09	1.08885e-07	up		TraesCS3B02G070600	0.435143	-1.20044	0.00197034	0.00901232	down
TraesCS4A02G102600	4.93741	2.30376	3.17597e-17	6.81987e-16	up		TraesCS3B02G072200	0.492925	-1.02056	1.38166e-29	5.38392e-28	down
TraesCS4A02G103700	3.815	1.93168	0.000397822	0.00216833	up		TraesCS3B02G080200	0.476147	-1.07052	5.57943e-09	6.25779e-08	down
TraesCS4A02G107000	3.15789	1.65896	1.31829e-05	9.54917e-05	up		TraesCS3B02G089300	0.466009	-1.10157	0.00149527	0.00708555	down
TraesCS4A02G107100	4.21147	2.07432	9.52728e-156	4.04791e-153	up		TraesCS3B02G090000	0.130184	-2.94138	2.79986e-55	2.30603e-53	down
TraesCS4A02G107200	3.15927	1.65959	5.82424e-19	1.38753e-17	up		TraesCS3B02G092700	0.0250077	-5.32149	0.00119332	0.0057988	down
TraesCS4A02G107800	4.40277	2.13841	0.00594357	0.0236587	up		TraesCS3B02G096500	0.163286	-2.61453	2.33221e-101	4.85406e-99	down
TraesCS4A02G108800	2.3208	1.21462	6.07894e-18	1.36731e-16	up		TraesCS3B02G100100	0.417755	-1.25927	5.09585e-08	5.10721e-07	down
TraesCS4A02G113900	5.9458	2.57187	0.001127	0.00550645	up		TraesCS3B02G109900	0.0138937	-6.16943	1.4742e-05	0.000105877	down
TraesCS4A02G130600	2.21562	1.14771	1.36535e-05	9.85875e-05	up		TraesCS3B02G110000	0.0454022	-4.46109	1.5886e-05	0.000113458	down
TraesCS4A02G131000	9.50915	3.24932	1.63801e-52	1.25202e-50	up		TraesCS3B02G116100	0.00322853	-8.27491	2.34777e-11	3.30906e-10	down
TraesCS4A02G135500	26.7947	4.74388	1.36262e-56	1.18737e-54	up		TraesCS3B02G118300	0.0297014	-5.07333	0.00250197	0.0110955	down
TraesCS4A02G136000	4.37742	2.13008	5.9308e-06	4.54225e-05	up		TraesCS3B02G119400	0.423517	-1.23951	3.45526e-15	6.48593e-14	down
TraesCS4A02G140500	2.32553	1.21756	1.27919e-16	2.64453e-15	up		TraesCS3B02G122900	0.281449	-1.82906	0.000524018	0.00277514	down
TraesCS4A02G183600	7.30904	2.86968	6.27387e-06	4.783e-05	up		TraesCS3B02G123700	0.213101	-2.23039	5.529e-38	2.82208e-36	down
TraesCS4A02G188200	2.05078	1.03617	5.41393e-06	4.17387e-05	up		TraesCS3B02G127700	0.456831	-1.13027	4.77034e-11	6.54669e-10	down
TraesCS4A02G192600	2.47719	1.3087	5.96452e-10	7.39944e-09	up		TraesCS3B02G128100	0.326919	-1.613	1.19257e-36	5.85891e-35	down
TraesCS4A02G192900	4.46408	2.15836	8.61168e-52	6.48582e-50	up		TraesCS3B02G129800	0.397745	-1.33008	1.32564e-15	2.56416e-14	down
TraesCS4A02G193900	4.51737	2.17548	1.05752e-05	7.76802e-05	up		TraesCS3B02G129900	0.162307	-2.6232	6.07175e-08	6.03132e-07	down
TraesCS4A02G199000	7.15742	2.83944	0.00255058	0.0112826	up		TraesCS3B02G133400	0.397587	-1.33066	5.36703e-83	8.26617e-81	down
TraesCS4A02G200600	2.00283	1.00204	1.53456e-29	5.95713e-28	up		TraesCS3B02G136000	0.23054	-2.11691	0.000737851	0.00377705	down
TraesCS4A02G201200	2.00094	1.00068	5.86669e-62	5.70078e-60	up		TraesCS3B02G137400	0.367965	-1.44236	8.52798e-67	9.07397e-65	down
TraesCS4A02G201800	3.02806	1.5984	0.000540774	0.00285431	up		TraesCS3B02G137600	0.0313931	-4.99341	0.00349639	0.0148974	down
TraesCS4A02G209700	2.00712	1.00512	0.0120659	0.0432706	up		TraesCS3B02G138900	0.467217	-1.09783	9.10746e-10	1.11018e-08	down
TraesCS4A02G223600	2.99006	1.58018	1.36065e-15	2.63024e-14	up		TraesCS3B02G144300	0.463257	-1.11012	0.00043028	0.00232815	down
TraesCS4A02G223800	3.68224	1.88058	3.48311e-21	9.4157e-20	up		TraesCS3B02G144400	0.448222	-1.15772	4.99802e-30	1.97254e-28	down
TraesCS4A02G224400	2.18012	1.12441	2.94684e-05	0.000201449	up		TraesCS3B02G144500	0.218795	-2.19235	2.34507e-21	6.39544e-20	down
TraesCS4A02G229600	36.0553	5.17214	0.00153872	0.00726405	up		TraesCS3B02G144600	0.438425	-1.1896	5.16254e-10	6.43302e-09	down
TraesCS4A02G239800	6.59276	2.72088	3.51738e-73	4.29951e-71	up		TraesCS3B02G145200	0.31497	-1.66671	1.48795e-14	2.67722e-13	down
TraesCS4A02G242800	7.96526	2.99372	2.72283e-97	5.30841e-95	up		TraesCS3B02G146500	0.325254	-1.62036	6.0861e-45	3.8456e-43	down
TraesCS4A02G243400	2.25376	1.17233	1.90242e-06	1.56688e-05	up		TraesCS3B02G148000	0.25217	-1.98753	0.00848883	0.0321235	down
TraesCS4A02G244500	3.67737	1.87867	1.58953e-09	1.8912e-08	up		TraesCS3B02G149400	0.0682586	-3.87285	6.01632e-101	1.23549e-98	down
TraesCS4A02G249600	2.07406	1.05245	1.7588e-05	0.000124675	up		TraesCS3B02G150500	0.143861	-2.79726	0.000157186	0.000934004	down
TraesCS4A02G258400	8.31988	3.05656	0.00964484	0.0357997	up		TraesCS3B02G153900	0.42922	-1.22021	1.15322e-38	6.03113e-37	down
TraesCS4A02G260500	3.5107	1.81176	0.00882964	0.0332032	up		TraesCS3B02G156900	0.249911	-2.00051	1.37095e-55	1.14756e-53	down
TraesCS4A02G260900	2.39261	1.25859	0.00336511	0.0144189	up		TraesCS3B02G158500	0.453754	-1.14002	2.60628e-18	5.99571e-17	down
TraesCS4A02G262700	2.34953	1.23237	6.60527e-26	2.21038e-24	up		TraesCS3B02G159500	0.114519	-3.12634	3.08983e-14	5.44805e-13	down
TraesCS4A02G277300	2.06265	1.0445	2.96609e-11	4.14264e-10	up		TraesCS3B02G160300	0.332279	-1.58953	1.82682e-19	4.47317e-18	down
TraesCS4A02G282200	2.23904	1.16288	0.0136482	0.0480525	up		TraesCS3B02G164700	0.362839	-1.4626	8.50175e-11	1.14036e-09	down
TraesCS4A02G288400	3.76263	1.91174	4.15648e-19	9.96374e-18	up		TraesCS3B02G166600	0.209374	-2.25585	1.83969e-05	0.000130049	down
TraesCS4A02G293700	3.77451	1.91629	1.09789e-19	2.72074e-18	up		TraesCS3B02G166900	0.413154	-1.27525	6.07785e-21	1.61535e-19	down
TraesCS4A02G296900	3.93785	1.97741	0.00657046	0.0258177	up		TraesCS3B02G167400	0.312746	-1.67694	2.77493e-17	5.97536e-16	down
TraesCS4A02G297800	2.87125	1.52168	2.7183e-13	4.47771e-12	up		TraesCS3B02G168900	0.155479	-2.68521	0.00220575	0.00993924	down
TraesCS4A02G298900	3.25903	1.70444	2.01692e-23	6.00272e-22	up		TraesCS3B02G171500	0.477156	-1.06747	1.08505e-07	1.04677e-06	down
TraesCS4A02G309900	4.17997	2.06349	0.000939759	0.00468152	up		TraesCS3B02G173800	0.21922	-2.18955	3.34415e-59	3.08418e-57	down
TraesCS4A02G310100	3.70434	1.88922	3.03262e-25	9.79708e-24	up		TraesCS3B02G174300	0.288388	-1.79392	0.0048538	0.0198624	down
TraesCS4A02G313600	2.29276	1.19709	0.000442553	0.00238721	up		TraesCS3B02G176000	0.375428	-1.41339	5.00609e-51	3.69353e-49	down
TraesCS4A02G317900	4.61499	2.20633	5.61344e-18	1.26538e-16	up		TraesCS3B02G177600	0.165194	-2.59777	0.00233305	0.0104434	down
TraesCS4A02G325000	5.57816	2.47979	3.10057e-07	2.82193e-06	up		TraesCS3B02G180100	0.421558	-1.2462	2.85627e-32	1.20939e-30	down
TraesCS4A02G325800	2.83524	1.50347	0.00600265	0.0238522	up		TraesCS3B02G184300	0.315151	-1.66589	0.0114411	0.0413913	down
TraesCS4A02G337100	3.31964	1.73103	0.00796612	0.0304579	up		TraesCS3B02G185100	0.372286	-1.42552	3.65784e-44	2.26026e-42	down
TraesCS4A02G352900	2.9944	1.58227	5.21687e-34	2.33403e-32	up		TraesCS3B02G185800	0.174187	-2.52129	0.00213696	0.00966604	down
TraesCS4A02G357200	2.60354	1.38048	5.148e-20	1.29662e-18	up		TraesCS3B02G188600	0.101876	-3.29511	0.0020551	0.00934417	down
TraesCS4A02G365600	2.89098	1.53156	4.04457e-07	3.63016e-06	up		TraesCS3B02G188800	0.0341771	-4.87083	0.000876716	0.00439621	down
TraesCS4A02G368600	2.94816	1.55982	2.39096e-08	2.49112e-07	up		TraesCS3B02G188900	0.108541	-3.20369	0.000680394	0.00351093	down
TraesCS4A02G372500	2.13222	1.09235	0.00502034	0.0204451	up		TraesCS3B02G190800	0.372413	-1.42502	7.16735e-05	0.000457242	down
TraesCS4A02G384900	2.4732	1.30638	2.87838e-08	2.96685e-07	up		TraesCS3B02G191100	0.0333298	-4.90704	6.90748e-80	9.82793e-78	down
TraesCS4A02G389000	2.34827	1.2316	0.0129168	0.045839	up		TraesCS3B02G198800	0.463474	-1.10944	4.7754e-05	0.000314478	down
TraesCS4A02G389300	2.53876	1.34412	0.00707908	0.0275694	up		TraesCS3B02G199600	0.179137	-2.48087	9.57014e-96	1.81972e-93	down
TraesCS4A02G393800	2.99356	1.58186	0.00137256	0.00657587	up		TraesCS3B02G204900	0.450552	-1.15023	9.49689e-15	1.73099e-13	down
TraesCS4A02G397700	2.96875	1.56986	0.00999331	0.036879	up		TraesCS3B02G209500	0.256482	-1.96307	3.65807e-14	6.42425e-13	down
TraesCS4A02G399300	2.85299	1.51247	8.5616e-07	7.37258e-06	up		TraesCS3B02G213000	0.197421	-2.34065	0.00191445	0.00878863	down
TraesCS4A02G400200	2.1141	1.08005	1.44489e-06	1.20928e-05	up		TraesCS3B02G213200	0.376047	-1.41101	0.00585656	0.0233682	down
TraesCS4A02G401300	2.24789	1.16857	3.61251e-34	1.62568e-32	up		TraesCS3B02G213400	0.296649	-1.75317	4.12409e-33	1.78924e-31	down
TraesCS4A02G407500	3.07538	1.62076	2.46288e-09	2.87369e-08	up		TraesCS3B02G215500	0.179466	-2.47822	3.38111e-20	8.60823e-19	down
TraesCS4A02G412500	2.12499	1.08746	4.08988e-54	3.27228e-52	up		TraesCS3B02G229900	0.337751	-1.56597	8.18092e-54	6.51166e-52	down
TraesCS4A02G414700	2.49354	1.3182	0.00158473	0.00744758	up		TraesCS3B02G234300	0.467047	-1.09836	4.45806e-11	6.13053e-10	down
TraesCS4A02G423600	2.36218	1.24012	1.69201e-07	1.58854e-06	up		TraesCS3B02G237700	0.14745	-2.76171	1.46918e-05	0.000105541	down
TraesCS4A02G428800	2.18142	1.12527	0.000299125	0.00167331	up		TraesCS3B02G239400	0.471586	-1.08441	1.62146e-32	6.9226e-31	down
TraesCS4A02G429100	2.14976	1.10418	0.000447326	0.00241001	up		TraesCS3B02G240200	0.450517	-1.15035	1.6022e-06	1.33279e-05	down
TraesCS4A02G432800	2.25758	1.17478	5.75175e-14	9.97883e-13	up		TraesCS3B02G241200	0.383797	-1.38158	1.97708e-13	3.29372e-12	down
TraesCS4A02G435300	6.35322	2.66749	0.00506593	0.0205923	up		TraesCS3B02G245100	0.461083	-1.1169	3.32316e-17	7.12351e-16	down
TraesCS4A02G436000	2.71083	1.43873	0.000518848	0.00275083	up		TraesCS3B02G247200	0.359165	-1.47728	7.73243e-05	0.000489843	down
TraesCS4A02G439000	5.10618	2.35224	1.92545e-29	7.43706e-28	up		TraesCS3B02G252000	0.234106	-2.09477	1.13997e-14	2.06743e-13	down
TraesCS4A02G440100	11.47	3.51979	7.13835e-43	4.27794e-41	up		TraesCS3B02G252400	0.193481	-2.36974	1.35868e-20	3.54079e-19	down
TraesCS4A02G443100	3.18834	1.67281	0.00557323	0.0223885	up		TraesCS3B02G253000	0.412975	-1.27587	2.57618e-05	0.000178047	down
TraesCS4A02G452400	2.68054	1.42253	3.25529e-05	0.00022065	up		TraesCS3B02G253200	0.442234	-1.17712	0.014249	0.0498233	down
TraesCS4A02G457600	2.40437	1.26566	2.49158e-17	5.38112e-16	up		TraesCS3B02G254100	0.334205	-1.58119	1.5604e-48	1.08623e-46	down
TraesCS4A02G462000	2.32879	1.21958	0.00088904	0.00445474	up		TraesCS3B02G254600	0.4881	-1.03475	0.000119578	0.000730041	down
TraesCS4A02G462300	2.7532	1.46111	1.39007e-21	3.84545e-20	up		TraesCS3B02G257200	0.237547	-2.07372	8.23281e-09	9.07657e-08	down
TraesCS4A02G468400	9.33908	3.22328	0.000277376	0.00156229	up		TraesCS3B02G258400	0.221605	-2.17394	1.89425e-28	7.01737e-27	down
TraesCS4A02G474800	7.13321	2.83455	1.68689e-78	2.31457e-76	up		TraesCS3B02G259300	0.0959005	-3.38232	0	0	down
TraesCS4A02G475000	9.07789	3.18236	5.42879e-06	4.18378e-05	up		TraesCS3B02G259500	0.411262	-1.28187	4.09303e-08	4.14873e-07	down
TraesCS4A02G481900	16.8771	4.07699	0.00828599	0.0314933	up		TraesCS3B02G261500	0.252807	-1.98389	0.0108253	0.0394924	down
TraesCS4A02G482000	4.36603	2.12632	0.0111198	0.0404162	up		TraesCS3B02G264400	0.416064	-1.26512	8.45425e-10	1.03362e-08	down
TraesCS4A02G485000	7.10266	2.82836	1.06845e-45	6.89257e-44	up		TraesCS3B02G265000	0.441965	-1.178	1.39756e-11	2.01074e-10	down
TraesCS4A02G485400	6.39528	2.67701	3.03755e-204	1.99079e-201	up		TraesCS3B02G270700	0.445745	-1.16571	0.00582717	0.0232645	down
TraesCS4A02G485900	5.14889	2.36426	5.92043e-43	3.55497e-41	up		TraesCS3B02G272600	0.0954938	-3.38845	1.41963e-211	1.00528e-208	down
TraesCS4A02G486000	3.98249	1.99367	1.04508e-44	6.5631e-43	up		TraesCS3B02G281800	0.481709	-1.05377	2.9047e-10	3.71959e-09	down
TraesCS4A02G486800	12.9727	3.6974	0.000608844	0.00317282	up		TraesCS3B02G282400	0.0198528	-5.65452	0.000230329	0.00131827	down
TraesCS4A02G487000	52.2918	5.70851	7.59018e-05	0.000481326	up		TraesCS3B02G282500	0.00138339	-9.49757	1.78518e-15	3.41551e-14	down
TraesCS4A02G489700	25.3908	4.66623	0.00658806	0.0258763	up		TraesCS3B02G284800	0.387439	-1.36796	7.21197e-10	8.87373e-09	down
TraesCS4A02G489800	1939.05	10.9211	3.60657e-20	9.17004e-19	up		TraesCS3B02G285600	0.377447	-1.40565	6.56397e-07	5.73517e-06	down
TraesCS4A02G489900	47.8375	5.58007	0.000150385	0.000898444	up		TraesCS3B02G288300	0.306647	-1.70535	0.000132796	0.000802072	down
TraesCS4A02G490700	145.258	7.18247	3.4462e-08	3.51739e-07	up		TraesCS3B02G289400	0.242067	-2.04652	1.89405e-36	9.24616e-35	down
TraesCS4A02G491600	10.3102	3.366	4.12767e-81	6.08357e-79	up		TraesCS3B02G289600	0.321038	-1.63918	4.41349e-90	7.7026e-88	down
TraesCS4A02G493800	2.97143	1.57116	1.76706e-06	1.46125e-05	up		TraesCS3B02G293200	0.0952243	-3.39253	4.95116e-08	4.9711e-07	down
TraesCS4A02G495500	2.14697	1.1023	2.52578e-17	5.45095e-16	up		TraesCS3B02G299200	0.361877	-1.46643	8.30613e-08	8.12119e-07	down
TraesCS4B02G007400	2.54909	1.34998	6.75415e-78	9.08521e-76	up		TraesCS3B02G310000	0.456418	-1.13157	8.84592e-28	3.18883e-26	down
TraesCS4B02G007500	5.02306	2.32857	0.00575064	0.0230022	up		TraesCS3B02G310900	0.433184	-1.20695	1.19319e-65	1.25015e-63	down
TraesCS4B02G007800	2.64402	1.40274	1.76143e-09	2.08605e-08	up		TraesCS3B02G311300	0.331496	-1.59293	0.00381808	0.0160934	down
TraesCS4B02G019600	2.98684	1.57862	6.823e-27	2.38968e-25	up		TraesCS3B02G313900	0.480247	-1.05815	0.000277203	0.0015616	down
TraesCS4B02G027900	2.11103	1.07795	0.0130823	0.0463195	up		TraesCS3B02G315500	0.413177	-1.27517	8.15551e-10	9.98483e-09	down
TraesCS4B02G030100	2.34784	1.23133	1.54212e-05	0.000110369	up		TraesCS3B02G328200	0.202792	-2.30193	1.43759e-12	2.24274e-11	down
TraesCS4B02G031300	7.96553	2.99377	0.0116132	0.0419106	up		TraesCS3B02G329100	0.433456	-1.20604	8.80175e-06	6.57033e-05	down
TraesCS4B02G035800	2.2774	1.18739	0.0105233	0.0385447	up		TraesCS3B02G333400	0.259954	-1.94367	0.000578446	0.0030303	down
TraesCS4B02G038100	2.49706	1.32023	3.3586e-21	9.08312e-20	up		TraesCS3B02G334500	0.158211	-2.66008	1.19623e-205	8.01044e-203	down
TraesCS4B02G043300	6.82562	2.77096	2.13143e-15	4.05782e-14	up		TraesCS3B02G344200	0.469594	-1.09051	4.30372e-61	4.11707e-59	down
TraesCS4B02G050500	2.1484	1.10326	7.88768e-50	5.68347e-48	up		TraesCS3B02G344800	0.243477	-2.03814	7.80265e-29	2.93646e-27	down
TraesCS4B02G052300	2.87284	1.52248	9.47349e-70	1.06893e-67	up		TraesCS3B02G349600	0.449188	-1.15461	0.00739896	0.0286054	down
TraesCS4B02G055200	3.25016	1.70051	4.27686e-06	3.34839e-05	up		TraesCS3B02G349900	0.271456	-1.88121	0.00356955	0.0151745	down
TraesCS4B02G055300	17.7293	4.14806	0.012129	0.0434615	up		TraesCS3B02G350400	0.03423	-4.86859	0.00530605	0.0214242	down
TraesCS4B02G059100	2.50685	1.32587	0.0120963	0.0433695	up		TraesCS3B02G351100	0.425313	-1.2334	3.40284e-09	3.91409e-08	down
TraesCS4B02G059200	32.5783	5.02584	2.5375e-05	0.000175472	up		TraesCS3B02G353800	0.38772	-1.36691	0.00170701	0.00794648	down
TraesCS4B02G060100	2.23243	1.15861	1.8238e-36	8.91032e-35	up		TraesCS3B02G354200	0.300843	-1.73292	0.00662641	0.0260071	down
TraesCS4B02G061300	2.72577	1.44666	0.00593208	0.0236175	up		TraesCS3B02G356400	0.424346	-1.23669	3.05617e-26	1.03963e-24	down
TraesCS4B02G065200	3.97553	1.99115	7.02759e-07	6.11337e-06	up		TraesCS3B02G356700	0.332694	-1.58773	2.16562e-36	1.05635e-34	down
TraesCS4B02G070500	6.17482	2.6264	1.30868e-07	1.24688e-06	up		TraesCS3B02G356800	0.302478	-1.7251	0.000798591	0.00405095	down
TraesCS4B02G071900	6.24089	2.64175	0.000824342	0.00416375	up		TraesCS3B02G357600	0.129538	-2.94855	3.12252e-11	4.35126e-10	down
TraesCS4B02G075200	8.79904	3.13735	2.05678e-123	5.81249e-121	up		TraesCS3B02G359800	0.0325359	-4.94182	5.03658e-102	1.06263e-99	down
TraesCS4B02G079400	2.17126	1.11854	0.00801705	0.0306299	up		TraesCS3B02G360600	0.439021	-1.18764	5.39925e-11	7.38033e-10	down
TraesCS4B02G079600	27.061	4.75815	5.57321e-05	0.000361991	up		TraesCS3B02G361700	0.380959	-1.39229	6.20033e-18	1.39359e-16	down
TraesCS4B02G086300	2.37302	1.24672	0.0119908	0.0430362	up		TraesCS3B02G362600	0.370688	-1.43172	2.42523e-33	1.06041e-31	down
TraesCS4B02G086500	3.88047	1.95623	0.00335606	0.0143861	up		TraesCS3B02G362900	0.400159	-1.32135	1.00793e-13	1.71859e-12	down
TraesCS4B02G092000	52.1422	5.70438	9.61487e-05	0.000599113	up		TraesCS3B02G363000	0.295636	-1.75811	4.74632e-12	7.09897e-11	down
TraesCS4B02G093400	3.84187	1.94181	9.649e-07	8.26193e-06	up		TraesCS3B02G363500	0.248949	-2.00608	0.00442057	0.0182875	down
TraesCS4B02G093600	2.16603	1.11505	5.23129e-07	4.62853e-06	up		TraesCS3B02G368000	0.449499	-1.15361	2.05856e-33	9.02005e-32	down
TraesCS4B02G095900	2.97267	1.57176	0.0113342	0.0410671	up		TraesCS3B02G370300	0.299044	-1.74157	2.52922e-59	2.34312e-57	down
TraesCS4B02G096800	10.0975	3.33592	5.83086e-19	1.38856e-17	up		TraesCS3B02G370600	0.180956	-2.46629	2.59644e-06	2.09947e-05	down
TraesCS4B02G098900	2.15461	1.10743	8.76804e-05	0.000550298	up		TraesCS3B02G378500	0.0157306	-5.99029	5.7432e-06	4.41119e-05	down
TraesCS4B02G104100	6.87885	2.78217	1.33961e-05	9.69568e-05	up		TraesCS3B02G379700	0.0637147	-3.97223	1.16072e-11	1.67979e-10	down
TraesCS4B02G106000	2.32343	1.21626	1.06689e-07	1.03055e-06	up		TraesCS3B02G387700	0.0547542	-4.19089	0.00967724	0.0358975	down
TraesCS4B02G106400	32.8071	5.03593	0.00153923	0.00726588	up		TraesCS3B02G391600	0.355449	-1.49229	1.73137e-06	1.43366e-05	down
TraesCS4B02G106500	2.99465	1.58239	3.69718e-19	8.88e-18	up		TraesCS3B02G395900	0.0825332	-3.59888	8.91798e-174	4.54058e-171	down
TraesCS4B02G107000	23.7458	4.5696	0.0110102	0.0400725	up		TraesCS3B02G397000	0.313897	-1.67164	5.92593e-10	7.35749e-09	down
TraesCS4B02G113000	3.96148	1.98604	0.00179915	0.00832886	up		TraesCS3B02G397800	0.0264864	-5.2386	0.000331852	0.00184001	down
TraesCS4B02G113200	2.62726	1.39356	4.21048e-07	3.76863e-06	up		TraesCS3B02G398000	0.406704	-1.29795	7.63094e-55	6.19393e-53	down
TraesCS4B02G121300	4.03764	2.01351	0.00216584	0.00978777	up		TraesCS3B02G400800	0.33316	-1.58571	5.42577e-13	8.74812e-12	down
TraesCS4B02G122300	3.76618	1.9131	1.42014e-33	6.25828e-32	up		TraesCS3B02G402700	0.300848	-1.7329	0.00663396	0.0260351	down
TraesCS4B02G124000	2.18417	1.12708	5.05333e-08	5.06542e-07	up		TraesCS3B02G404500	0.138187	-2.85531	0.000584124	0.00305693	down
TraesCS4B02G129000	3.84472	1.94288	2.33379e-05	0.000162369	up		TraesCS3B02G404600	0.0175439	-5.83289	0.000122222	0.000743969	down
TraesCS4B02G139500	2.0501	1.0357	0.00348502	0.0148562	up		TraesCS3B02G404800	0.388828	-1.3628	0.00743588	0.0287176	down
TraesCS4B02G139900	2.05355	1.03812	2.3224e-09	2.71647e-08	up		TraesCS3B02G406000	0.30818	-1.69816	9.18354e-25	2.91184e-23	down
TraesCS4B02G148700	4.0283	2.01017	0.00318348	0.0137564	up		TraesCS3B02G409000	0.175328	-2.51187	9.67131e-35	4.4266e-33	down
TraesCS4B02G155500	2.00867	1.00624	6.26169e-12	9.27317e-11	up		TraesCS3B02G409100	0.21538	-2.21504	1.09681e-11	1.58879e-10	down
TraesCS4B02G172600	2.04289	1.03061	0.00421055	0.0175258	up		TraesCS3B02G412500	0.487808	-1.03561	1.06559e-05	7.82246e-05	down
TraesCS4B02G173600	4.24944	2.08727	2.53342e-11	3.5569e-10	up		TraesCS3B02G414100	0.208493	-2.26193	0.000121177	0.000738629	down
TraesCS4B02G174100	2.34188	1.22767	1.03935e-39	5.64651e-38	up		TraesCS3B02G415200	0.278822	-1.84258	0.00598154	0.0237868	down
TraesCS4B02G176700	2.5084	1.32677	2.56396e-09	2.98653e-08	up		TraesCS3B02G415900	0.264099	-1.92085	3.06295e-65	3.18748e-63	down
TraesCS4B02G179300	3.89112	1.96019	0.000393012	0.00214629	up		TraesCS3B02G420600	0.121328	-3.04301	8.02697e-11	1.0795e-09	down
TraesCS4B02G180300	3.46519	1.79293	0.000737805	0.00377705	up		TraesCS3B02G422000	0.0489198	-4.35344	0.00526359	0.0212792	down
TraesCS4B02G181900	4.16303	2.05763	0.00816455	0.0311018	up		TraesCS3B02G424800	0.26819	-1.89868	2.34582e-06	1.90835e-05	down
TraesCS4B02G189000	2.50729	1.32613	0.00100943	0.00499103	up		TraesCS3B02G430900	0.289183	-1.78994	5.26517e-154	2.1917e-151	down
TraesCS4B02G190200	7.60325	2.92662	9.02444e-10	1.10071e-08	up		TraesCS3B02G436200	0.111946	-3.15912	3.86609e-05	0.00025872	down
TraesCS4B02G190400	16.765	4.06738	0.0119539	0.0429312	up		TraesCS3B02G437200	0.388771	-1.36301	0.000635253	0.00330039	down
TraesCS4B02G195000	2.22017	1.15067	4.29088e-05	0.000284827	up		TraesCS3B02G437900	0.0679318	-3.87977	2.19134e-42	1.29685e-40	down
TraesCS4B02G195500	5.14476	2.3631	0.000108233	0.000667194	up		TraesCS3B02G438900	0.426464	-1.2295	0.0126893	0.0451957	down
TraesCS4B02G197500	22.3469	4.482	0.0105022	0.0384771	up		TraesCS3B02G439900	0.238484	-2.06803	0.000855456	0.00430221	down
TraesCS4B02G202000	2.30142	1.20253	1.01355e-13	1.7273e-12	up		TraesCS3B02G440600	0.403445	-1.30956	2.87394e-12	4.3728e-11	down
TraesCS4B02G207700	2.37902	1.25037	2.65357e-41	1.5151e-39	up		TraesCS3B02G441800	0.335757	-1.57451	0.00889769	0.0334142	down
TraesCS4B02G207900	2.7991	1.48496	1.01315e-40	5.64868e-39	up		TraesCS3B02G448000	0.418281	-1.25746	1.80842e-06	1.49365e-05	down
TraesCS4B02G209400	2.27162	1.18372	0.000676152	0.0034908	up		TraesCS3B02G448100	0.229641	-2.12255	5.9599e-57	5.25281e-55	down
TraesCS4B02G210100	13.6722	3.77318	7.48495e-178	4.15428e-175	up		TraesCS3B02G450600	0.470062	-1.08908	0.000666747	0.00344686	down
TraesCS4B02G213700	2.37423	1.24746	3.9338e-10	4.94995e-09	up		TraesCS3B02G451800	0.33393	-1.58238	8.11046e-122	2.24063e-119	down
TraesCS4B02G217100	2.52667	1.33724	4.71236e-30	1.86218e-28	up		TraesCS3B02G456900	0.225334	-2.14987	0.00101223	0.00500285	down
TraesCS4B02G221100	2.11528	1.08085	5.58426e-15	1.03312e-13	up		TraesCS3B02G457600	0.25225	-1.98708	3.83638e-102	8.14993e-100	down
TraesCS4B02G222200	2.13567	1.09469	1.20811e-14	2.18649e-13	up		TraesCS3B02G457700	0.353093	-1.50188	0.00528523	0.0213485	down
TraesCS4B02G224800	8.14011	3.02505	7.81744e-129	2.3842e-126	up		TraesCS3B02G458700	0.231125	-2.11326	8.897e-20	2.21372e-18	down
TraesCS4B02G227000	3.35063	1.74443	0.00618864	0.0245012	up		TraesCS3B02G468400	0.4353	-1.19992	2.75898e-06	2.22123e-05	down
TraesCS4B02G231700	2.2098	1.14391	1.08729e-06	9.24056e-06	up		TraesCS3B02G468800	0.450108	-1.15166	0.000302845	0.0016932	down
TraesCS4B02G236400	2.14362	1.10005	1.19032e-14	2.15491e-13	up		TraesCS3B02G470600	0.00974761	-6.68074	1.00381e-06	8.57245e-06	down
TraesCS4B02G240700	53.1772	5.73274	3.89233e-224	3.11422e-221	up		TraesCS3B02G470700	0.487263	-1.03723	2.76483e-06	2.22512e-05	down
TraesCS4B02G251400	2.28392	1.19151	0.00790534	0.0302669	up		TraesCS3B02G471300	0.418668	-1.25612	3.45922e-06	2.74488e-05	down
TraesCS4B02G254300	3.74957	1.90672	2.21225e-17	4.79388e-16	up		TraesCS3B02G471500	0.0168207	-5.89362	1.91388e-152	7.75712e-150	down
TraesCS4B02G255700	2.04319	1.03082	1.66916e-13	2.79706e-12	up		TraesCS3B02G471600	0.110194	-3.18188	8.70093e-39	4.5737e-37	down
TraesCS4B02G264500	4.73208	2.24247	0.00537562	0.021671	up		TraesCS3B02G472700	0.265776	-1.91172	4.80151e-06	3.72975e-05	down
TraesCS4B02G268100	73.8096	6.20574	1.00733e-36	4.96864e-35	up		TraesCS3B02G472800	0.479136	-1.06149	1.41075e-16	2.90676e-15	down
TraesCS4B02G270600	24.5844	4.61967	0.00160409	0.00752879	up		TraesCS3B02G483500	0.19362	-2.3687	1.12534e-123	3.19488e-121	down
TraesCS4B02G275300	56.0426	5.80845	9.66229e-06	7.15032e-05	up		TraesCS3B02G489000	0.384274	-1.37979	1.19855e-07	1.14907e-06	down
TraesCS4B02G283800	6.37306	2.67199	2.44794e-13	4.04751e-12	up		TraesCS3B02G489500	0.159689	-2.64666	1.35417e-05	9.78606e-05	down
TraesCS4B02G286400	2.05684	1.04043	3.87186e-16	7.7673e-15	up		TraesCS3B02G496100	0.0395665	-4.65958	0.0102554	0.0377084	down
TraesCS4B02G289100	2.19317	1.13302	1.38233e-05	9.97086e-05	up		TraesCS3B02G499300	0.358895	-1.47837	2.21494e-14	3.94039e-13	down
TraesCS4B02G290500	2.02412	1.0173	0.000110976	0.000682946	up		TraesCS3B02G514800	0.454987	-1.1361	0.0073776	0.0285336	down
TraesCS4B02G294000	49.0156	5.61517	0.000228918	0.00131129	up		TraesCS3B02G524700	0.138334	-2.85377	1.10026e-16	2.28381e-15	down
TraesCS4B02G296400	18.3462	4.19741	0.00644995	0.025397	up		TraesCS3B02G524800	0.0137394	-6.18553	1.62881e-05	0.000116101	down
TraesCS4B02G299600	3.22581	1.68966	0.00878415	0.0330563	up		TraesCS3B02G525000	0.184245	-2.44031	9.98158e-43	5.97025e-41	down
TraesCS4B02G302500	2.90872	1.54039	5.66238e-09	6.34605e-08	up		TraesCS3B02G525200	0.125221	-2.99746	7.0875e-20	1.77064e-18	down
TraesCS4B02G305900	2.80139	1.48614	2.04457e-40	1.1307e-38	up		TraesCS3B02G525400	0.297741	-1.74787	1.5865e-18	3.68967e-17	down
TraesCS4B02G313800	2.04677	1.03335	0.00114782	0.00559665	up		TraesCS3B02G526000	0.11208	-3.1574	2.0292e-48	1.40464e-46	down
TraesCS4B02G315400	2.06377	1.04528	4.90789e-16	9.80734e-15	up		TraesCS3B02G526300	0.374599	-1.41658	0.000221412	0.00127279	down
TraesCS4B02G323100	41.8259	5.38632	0.000350163	0.00193302	up		TraesCS3B02G526700	0.136534	-2.87267	8.32806e-25	2.64195e-23	down
TraesCS4B02G323300	11.349	3.5045	4.46747e-231	3.71929e-228	up		TraesCS3B02G529100	0.417944	-1.25862	0.000143223	0.000859322	down
TraesCS4B02G326800	2.75282	1.46091	3.35305e-45	2.12741e-43	up		TraesCS3B02G529800	0.228768	-2.12804	1.12558e-05	8.22777e-05	down
TraesCS4B02G329100	10.0747	3.33267	0.000127378	0.000772377	up		TraesCS3B02G530000	0.327292	-1.61135	4.46843e-14	7.79849e-13	down
TraesCS4B02G330500	4.7105	2.23588	2.45723e-26	8.41015e-25	up		TraesCS3B02G537600	0.43602	-1.19753	2.02329e-20	5.23074e-19	down
TraesCS4B02G334800	3.2884	1.71739	0.00578109	0.023109	up		TraesCS3B02G538100	0.345402	-1.53365	4.43073e-13	7.18705e-12	down
TraesCS4B02G335500	2.79601	1.48337	7.20288e-33	3.09663e-31	up		TraesCS3B02G538300	0.429871	-1.21802	3.75088e-46	2.45569e-44	down
TraesCS4B02G337600	8.86831	3.14866	3.68266e-11	5.09951e-10	up		TraesCS3B02G553900	0.328484	-1.60611	3.99168e-12	5.99794e-11	down
TraesCS4B02G338500	5.1041	2.35166	0.000160065	0.000949004	up		TraesCS3B02G554300	0.0832004	-3.58727	5.59819e-104	1.21439e-101	down
TraesCS4B02G339700	2.2382	1.16234	4.21247e-21	1.12883e-19	up		TraesCS3B02G557100	0.408714	-1.29084	0.00128268	0.00619345	down
TraesCS4B02G339800	100.134	6.64578	5.181e-07	4.586e-06	up		TraesCS3B02G563100	0.467553	-1.0968	0.00263013	0.0115979	down
TraesCS4B02G341400	4.73974	2.24481	8.25105e-31	3.33764e-29	up		TraesCS3B02G563500	0.020741	-5.59137	0.000305575	0.00170676	down
TraesCS4B02G344300	2.0228	1.01635	6.93715e-06	5.25759e-05	up		TraesCS3B02G563700	0.0144832	-6.10948	2.15736e-21	5.90705e-20	down
TraesCS4B02G349100	3.72645	1.8978	0.00183841	0.0084832	up		TraesCS3B02G580900	0.028693	-5.12316	0.00217579	0.00982441	down
TraesCS4B02G356600	2.55806	1.35505	5.61717e-24	1.72769e-22	up		TraesCS3B02G581700	0.381831	-1.38899	5.73371e-08	5.71211e-07	down
TraesCS4B02G366800	4.10528	2.03748	0.000103735	0.000641515	up		TraesCS3B02G584700	0.0178968	-5.80416	2.8281e-13	4.65235e-12	down
TraesCS4B02G367000	3.71798	1.89452	0.000108068	0.000666243	up		TraesCS3B02G610400	0.466202	-1.10097	0.00224554	0.0100959	down
TraesCS4B02G369900	11.9203	3.57535	0.00148368	0.00703982	up		TraesCS3D02G009800	0.474993	-1.07402	8.00391e-18	1.78529e-16	down
TraesCS4B02G391200	16.8998	4.07893	0.00901941	0.0337951	up		TraesCS3D02G024700	0.0922228	-3.43873	7.79164e-08	7.63633e-07	down
TraesCS4B02G397700	2.0421	1.03005	6.68814e-11	9.06434e-10	up		TraesCS3D02G027300	0.00711621	-7.13468	8.48108e-08	8.2883e-07	down
TraesCS4B02G397900	16.1811	4.01623	0.00226863	0.0101861	up		TraesCS3D02G028900	0.303544	-1.72002	4.60776e-07	4.10099e-06	down
TraesCS4B02G398000	3.92379	1.97225	0.000270081	0.00152413	up		TraesCS3D02G031100	0.396686	-1.33393	0.000188296	0.00109937	down
TraesCS4D02G003400	4.1186	2.04215	1.10332e-12	1.73665e-11	up		TraesCS3D02G032400	0.472263	-1.08234	4.3492e-10	5.45705e-09	down
TraesCS4D02G006400	2.98144	1.57601	0.0024494	0.0108945	up		TraesCS3D02G036600	0.393864	-1.34423	0.000805428	0.00408227	down
TraesCS4D02G012100	2.26286	1.17815	3.65187e-27	1.29151e-25	up		TraesCS3D02G037900	0.176454	-2.50264	4.66465e-28	1.70347e-26	down
TraesCS4D02G012700	2.02009	1.01442	2.20331e-08	2.3034e-07	up		TraesCS3D02G038200	0.0333544	-4.90598	0.00563194	0.0226008	down
TraesCS4D02G013500	25.4422	4.66915	0.00715973	0.0278185	up		TraesCS3D02G039300	0.437082	-1.19403	6.53575e-24	1.99925e-22	down
TraesCS4D02G014300	2.20458	1.1405	1.05912e-09	1.28342e-08	up		TraesCS3D02G052100	0.389567	-1.36006	2.25619e-58	2.03808e-56	down
TraesCS4D02G015100	3.33576	1.73801	3.79848e-05	0.000254528	up		TraesCS3D02G054100	0.420623	-1.2494	1.45236e-09	1.7347e-08	down
TraesCS4D02G018100	2.32162	1.21513	8.54553e-17	1.78766e-15	up		TraesCS3D02G055400	0.482735	-1.0507	1.28168e-05	9.29931e-05	down
TraesCS4D02G023900	4.22706	2.07966	2.81958e-07	2.5803e-06	up		TraesCS3D02G058300	0.462781	-1.1116	7.17488e-06	5.42293e-05	down
TraesCS4D02G029700	2.28023	1.18918	0.0114097	0.0413043	up		TraesCS3D02G060600	0.38742	-1.36803	2.80234e-16	5.67534e-15	down
TraesCS4D02G037800	17.6167	4.13887	0.00133274	0.00640952	up		TraesCS3D02G060800	0.397942	-1.32937	0.00282893	0.0123929	down
TraesCS4D02G040900	2.30552	1.20509	1.16938e-08	1.26389e-07	up		TraesCS3D02G067500	0.282806	-1.82211	2.66189e-11	3.72877e-10	down
TraesCS4D02G044400	2.61521	1.38693	5.96385e-28	2.16764e-26	up		TraesCS3D02G072500	0.175058	-2.51409	5.03729e-06	3.90355e-05	down
TraesCS4D02G053400	2.21191	1.14529	2.5718e-26	8.78762e-25	up		TraesCS3D02G072600	0.17374	-2.52499	0.00840308	0.0318636	down
TraesCS4D02G055000	4.33587	2.11632	2.65701e-05	0.000183161	up		TraesCS3D02G074400	0.458911	-1.12371	5.2231e-49	3.66491e-47	down
TraesCS4D02G055900	2.40251	1.26454	3.56833e-09	4.09145e-08	up		TraesCS3D02G078400	0.0575918	-4.11799	0.00149739	0.00709395	down
TraesCS4D02G057400	2.17755	1.12271	1.57104e-30	6.30944e-29	up		TraesCS3D02G080800	0.0916556	-3.44763	1.27655e-12	1.9996e-11	down
TraesCS4D02G060400	2.05986	1.04254	1.30074e-07	1.24009e-06	up		TraesCS3D02G081300	0.203312	-2.29823	1.57592e-75	2.01426e-73	down
TraesCS4D02G064800	4.12673	2.045	0.00886744	0.0333209	up		TraesCS3D02G084300	0.134837	-2.89071	1.35178e-08	1.45187e-07	down
TraesCS4D02G068900	3.6194	1.85575	2.2875e-14	4.06596e-13	up		TraesCS3D02G084600	0.399864	-1.32242	1.69134e-09	2.0069e-08	down
TraesCS4D02G069300	3.12358	1.6432	3.66758e-07	3.30818e-06	up		TraesCS3D02G084700	0.0275173	-5.18352	0.00144756	0.00689234	down
TraesCS4D02G071100	2.18108	1.12504	0.00408956	0.0170811	up		TraesCS3D02G091700	0.256262	-1.96431	3.37685e-17	7.23358e-16	down
TraesCS4D02G073400	2.06288	1.04466	0.00988728	0.0365688	up		TraesCS3D02G094900	0.0190204	-5.71631	0.000150717	0.000899962	down
TraesCS4D02G073900	5.33463	2.41539	4.34674e-35	2.00592e-33	up		TraesCS3D02G100000	0.140281	-2.83361	3.24644e-10	4.13059e-09	down
TraesCS4D02G074500	2.23797	1.16219	0.0027148	0.0119371	up		TraesCS3D02G102300	0.00710461	-7.13703	5.79565e-08	5.77056e-07	down
TraesCS4D02G096100	2.04205	1.03002	6.51489e-05	0.000418603	up		TraesCS3D02G103800	0.226671	-2.14133	2.23272e-26	7.66303e-25	down
TraesCS4D02G101100	7.65073	2.9356	0.000974536	0.00483555	up		TraesCS3D02G104200	0.20878	-2.25995	1.45408e-52	1.1142e-50	down
TraesCS4D02G101200	28.4699	4.83136	0.00369406	0.0156358	up		TraesCS3D02G104400	0.11211	-3.15701	2.29088e-43	1.38503e-41	down
TraesCS4D02G102400	3.845	1.94298	0.00407375	0.0170289	up		TraesCS3D02G106500	0.402591	-1.31261	0.000914073	0.00456754	down
TraesCS4D02G102800	6.19527	2.63117	0.00300539	0.0130887	up		TraesCS3D02G107400	0.227555	-2.13571	3.1467e-60	2.97329e-58	down
TraesCS4D02G117800	2.04334	1.03093	6.4364e-26	2.15504e-24	up		TraesCS3D02G110900	0.360679	-1.47121	2.35542e-28	8.69446e-27	down
TraesCS4D02G119400	3.98819	1.99573	0.000104802	0.000647603	up		TraesCS3D02G113200	0.311084	-1.68462	0.00849312	0.0321339	down
TraesCS4D02G120400	3.90224	1.9643	7.67402e-55	6.2207e-53	up		TraesCS3D02G113300	0.266722	-1.90659	0.00880724	0.0331311	down
TraesCS4D02G120600	2.054	1.03844	0.00150993	0.00714839	up		TraesCS3D02G116400	0.383326	-1.38336	2.38974e-58	2.15241e-56	down
TraesCS4D02G120700	2.32993	1.22029	3.05764e-12	4.64199e-11	up		TraesCS3D02G118800	0.0214698	-5.54155	7.233e-05	0.00046113	down
TraesCS4D02G126800	2.68374	1.42424	0.00243704	0.0108482	up		TraesCS3D02G120200	0.283112	-1.82055	1.49867e-145	5.62978e-143	down
TraesCS4D02G134600	4.59501	2.20007	9.51176e-12	1.38642e-10	up		TraesCS3D02G125000	0.115339	-3.11605	0.000215165	0.00124001	down
TraesCS4D02G136900	4.02856	2.01026	3.52191e-07	3.18284e-06	up		TraesCS3D02G126300	0.4422	-1.17723	2.04121e-25	6.66771e-24	down
TraesCS4D02G145200	2.20154	1.13851	7.11885e-11	9.61778e-10	up		TraesCS3D02G127100	0.33312	-1.58589	2.67144e-15	5.05776e-14	down
TraesCS4D02G147500	2.87053	1.52132	2.79564e-05	0.000191858	up		TraesCS3D02G127500	0.0252313	-5.30864	0.000146065	0.000875184	down
TraesCS4D02G170500	4.26938	2.09403	0.000105491	0.000651399	up		TraesCS3D02G128500	0.295038	-1.76103	2.63861e-21	7.18007e-20	down
TraesCS4D02G171200	4.22053	2.07742	9.8761e-08	9.57867e-07	up		TraesCS3D02G128800	0.38441	-1.37928	6.92016e-34	3.08488e-32	down
TraesCS4D02G178100	2.31505	1.21104	2.67536e-15	5.06363e-14	up		TraesCS3D02G130700	0.219849	-2.18542	5.64343e-10	7.01665e-09	down
TraesCS4D02G178400	2.78367	1.47699	8.53594e-06	6.37964e-05	up		TraesCS3D02G131200	0.277574	-1.84906	0.00107172	0.00526182	down
TraesCS4D02G179700	2.20703	1.14211	9.9679e-69	1.1025e-66	up		TraesCS3D02G134000	0.250029	-1.99983	1.40777e-11	2.02494e-10	down
TraesCS4D02G191600	3.72707	1.89804	2.93331e-16	5.92889e-15	up		TraesCS3D02G134800	0.351314	-1.50917	4.40348e-42	2.58613e-40	down
TraesCS4D02G194100	3.51853	1.81497	0.00656461	0.0258024	up		TraesCS3D02G135700	0.312904	-1.67621	4.5151e-06	3.52326e-05	down
TraesCS4D02G196100	2.46045	1.29892	3.83006e-25	1.2328e-23	up		TraesCS3D02G136000	0.444689	-1.16913	7.40147e-05	0.000470716	down
TraesCS4D02G197500	2.51317	1.32951	3.39947e-09	3.91095e-08	up		TraesCS3D02G136800	0.376663	-1.40865	1.96541e-82	2.96771e-80	down
TraesCS4D02G197700	3.98733	1.99542	1.06899e-44	6.70645e-43	up		TraesCS3D02G137700	0.38855	-1.36383	7.33811e-05	0.00046712	down
TraesCS4D02G197900	2.35245	1.23417	3.17996e-23	9.37359e-22	up		TraesCS3D02G139600	0.275823	-1.85819	3.50489e-53	2.74986e-51	down
TraesCS4D02G202800	2.87939	1.52576	1.29052e-17	2.83744e-16	up		TraesCS3D02G141100	0.427785	-1.22504	8.04068e-52	6.06319e-50	down
TraesCS4D02G210900	9.51148	3.24967	7.28147e-128	2.17762e-125	up		TraesCS3D02G142500	0.242891	-2.04162	8.24519e-28	2.9775e-26	down
TraesCS4D02G212800	2.77707	1.47356	0.00197715	0.00903743	up		TraesCS3D02G144900	0.251592	-1.99084	1.5733e-31	6.50076e-30	down
TraesCS4D02G219100	2.55299	1.35219	3.47359e-11	4.81543e-10	up		TraesCS3D02G147200	0.469739	-1.09007	0.00199895	0.00911811	down
TraesCS4D02G221500	3.43623	1.78083	1.00057e-12	1.58301e-11	up		TraesCS3D02G147800	0.208726	-2.26031	8.09413e-24	2.46371e-22	down
TraesCS4D02G225400	3.87376	1.95373	5.57496e-35	2.56311e-33	up		TraesCS3D02G151400	0.365115	-1.45358	0.0134325	0.0473854	down
TraesCS4D02G231400	2.14279	1.09949	1.98617e-05	0.000139682	up		TraesCS3D02G153500	0.329376	-1.60219	3.66874e-19	8.81857e-18	down
TraesCS4D02G236800	6.50417	2.70136	7.15277e-40	3.89965e-38	up		TraesCS3D02G155300	0.322271	-1.63365	4.58128e-07	4.08036e-06	down
TraesCS4D02G238300	47.834	5.57996	0.000167118	0.000986645	up		TraesCS3D02G156700	0.43698	-1.19436	4.9588e-40	2.71071e-38	down
TraesCS4D02G240400	31.2258	4.96467	5.64062e-133	1.83863e-130	up		TraesCS3D02G159200	0.0387178	-4.69086	3.01175e-28	1.10641e-26	down
TraesCS4D02G242600	7.13918	2.83576	0.000397509	0.00216682	up		TraesCS3D02G160800	0.448459	-1.15695	2.12697e-15	4.05057e-14	down
TraesCS4D02G260800	2.49122	1.31685	0.0140971	0.0493846	up		TraesCS3D02G160900	0.347678	-1.52418	0.00343934	0.0146818	down
TraesCS4D02G262900	4.49857	2.16947	1.86669e-57	1.65947e-55	up		TraesCS3D02G164900	0.1785	-2.48601	1.71812e-63	1.72672e-61	down
TraesCS4D02G265100	3.01345	1.59142	0.000295337	0.00165422	up		TraesCS3D02G166600	0.454992	-1.13609	0.00247248	0.0109825	down
TraesCS4D02G266700	2.00932	1.00671	1.02067e-13	1.73799e-12	up		TraesCS3D02G167700	0.370645	-1.43189	2.62711e-07	2.4124e-06	down
TraesCS4D02G267500	65.325	6.02956	1.47652e-11	2.11839e-10	up		TraesCS3D02G175300	0.0665691	-3.909	2.76307e-26	9.42027e-25	down
TraesCS4D02G282400	16.1633	4.01465	0.000162792	0.000963691	up		TraesCS3D02G177400	0.168799	-2.56662	0.0014482	0.00689429	down
TraesCS4D02G282600	2.95828	1.56476	3.37263e-06	2.67998e-05	up		TraesCS3D02G180600	0.466799	-1.09913	1.30063e-20	3.39526e-19	down
TraesCS4D02G285100	2.39787	1.26175	1.74796e-26	6.02272e-25	up		TraesCS3D02G180800	0.124804	-3.00227	2.49546e-151	9.98296e-149	down
TraesCS4D02G288200	4.18367	2.06477	1.98607e-12	3.06196e-11	up		TraesCS3D02G180900	0.489023	-1.03203	8.92276e-33	3.82802e-31	down
TraesCS4D02G288800	2.73409	1.45106	3.38877e-09	3.89936e-08	up		TraesCS3D02G186800	0.125689	-2.99207	3.13341e-06	2.50538e-05	down
TraesCS4D02G293600	38.8741	5.28074	0.000686276	0.00353802	up		TraesCS3D02G187800	0.196525	-2.34722	1.70143e-41	9.80543e-40	down
TraesCS4D02G301000	2.01369	1.00984	5.1103e-07	4.52732e-06	up		TraesCS3D02G189900	0.009559	-6.70892	1.40002e-07	1.32776e-06	down
TraesCS4D02G307300	2.94568	1.5586	4.69936e-07	4.17829e-06	up		TraesCS3D02G192500	0.474143	-1.07661	0.000155853	0.000927246	down
TraesCS4D02G309900	2.1742	1.12049	3.54709e-23	1.04258e-21	up		TraesCS3D02G194300	0.359964	-1.47408	6.64494e-86	1.08014e-83	down
TraesCS4D02G314100	46.1305	5.52765	0.00025143	0.00142724	up		TraesCS3D02G201900	0.255137	-1.97066	2.60331e-50	1.89108e-48	down
TraesCS4D02G319700	47.4822	5.56931	3.13184e-05	0.000213009	up		TraesCS3D02G209200	0.43675	-1.19512	2.03475e-57	1.80626e-55	down
TraesCS4D02G320100	3.24233	1.69703	6.65807e-08	6.58296e-07	up		TraesCS3D02G209800	0.0803889	-3.63686	5.93345e-11	8.08543e-10	down
TraesCS4D02G320900	2.01117	1.00803	0.000160372	0.000950552	up		TraesCS3D02G212000	0.45548	-1.13454	1.33212e-45	8.58449e-44	down
TraesCS4D02G323500	4.70083	2.23292	9.84338e-42	5.73177e-40	up		TraesCS3D02G212700	0.363411	-1.46033	5.55323e-05	0.000360922	down
TraesCS4D02G325700	2.64009	1.40059	0.00719754	0.0279306	up		TraesCS3D02G219000	0.313654	-1.67276	0.00773768	0.029708	down
TraesCS4D02G326900	4.47796	2.16284	4.24703e-07	3.80024e-06	up		TraesCS3D02G220800	0.386002	-1.37332	0.000540616	0.00285392	down
TraesCS4D02G334600	2.63093	1.39557	3.30929e-09	3.81289e-08	up		TraesCS3D02G223300	0.166206	-2.58895	0	0	down
TraesCS4D02G339400	4.07453	2.02664	2.39351e-25	7.78958e-24	up		TraesCS3D02G223400	0.370138	-1.43387	5.26274e-07	4.65167e-06	down
TraesCS4D02G343800	2.36969	1.2447	0.00276533	0.0121415	up		TraesCS3D02G224100	0.387766	-1.36674	1.12719e-09	1.36243e-08	down
TraesCS4D02G347100	3.39219	1.76222	4.61436e-07	4.10627e-06	up		TraesCS3D02G229000	0.411322	-1.28166	1.68569e-19	4.13416e-18	down
TraesCS4D02G347800	2.61063	1.3844	0.00840725	0.0318766	up		TraesCS3D02G229800	0.18038	-2.47089	9.26351e-27	3.23158e-25	down
TraesCS4D02G360800	62.8732	5.97437	2.46502e-05	0.000170728	up		TraesCS3D02G232500	0.440393	-1.18314	0.0142779	0.0499018	down
TraesCS4D02G360900	2.43714	1.28519	0.00934474	0.0348509	up		TraesCS3D02G232900	0.352101	-1.50594	6.51207e-05	0.000418472	down
TraesCS4D02G361000	5.57698	2.47948	9.80698e-12	1.42663e-10	up		TraesCS3D02G234400	0.290706	-1.78237	3.73314e-47	2.50531e-45	down
TraesCS4D02G361100	2.56356	1.35815	9.36364e-12	1.36633e-10	up		TraesCS3D02G235600	0.218567	-2.19386	0.00466558	0.0191749	down
TraesCS5A02G004500	19.8753	4.3129	1.72672e-11	2.46245e-10	up		TraesCS3D02G238300	0.402198	-1.31402	5.55713e-21	1.48143e-19	down
TraesCS5A02G004600	2.59306	1.37466	7.57562e-26	2.52823e-24	up		TraesCS3D02G238600	0.0788021	-3.66562	0.00135978	0.00652277	down
TraesCS5A02G004700	2.19004	1.13096	1.12526e-08	1.21984e-07	up		TraesCS3D02G242600	0.328264	-1.60707	1.49741e-05	0.000107393	down
TraesCS5A02G004900	2.02195	1.01575	0.00021403	0.00123462	up		TraesCS3D02G244800	0.100114	-3.32029	1.3252e-127	3.94403e-125	down
TraesCS5A02G011000	2.43745	1.28537	4.91639e-08	4.93779e-07	up		TraesCS3D02G251100	0.139283	-2.84391	0.00464216	0.0190889	down
TraesCS5A02G012400	3.54264	1.82483	3.52135e-19	8.48085e-18	up		TraesCS3D02G253700	0.107056	-3.22357	1.25484e-54	1.01054e-52	down
TraesCS5A02G019700	2.45865	1.29787	0.0110258	0.0401221	up		TraesCS3D02G256400	0.474258	-1.07626	0.00441341	0.0182616	down
TraesCS5A02G020900	2.31879	1.21337	3.7747e-82	5.6581e-80	up		TraesCS3D02G256500	0.461007	-1.11714	2.08462e-16	4.25396e-15	down
TraesCS5A02G025200	2.68206	1.42334	0.0016851	0.00786053	up		TraesCS3D02G256700	0.361955	-1.46612	7.70886e-85	1.22718e-82	down
TraesCS5A02G025400	2.0583	1.04145	4.51307e-19	1.07975e-17	up		TraesCS3D02G258200	0.219574	-2.18722	1.04522e-33	4.63592e-32	down
TraesCS5A02G029900	5.05714	2.33832	3.97646e-26	1.34381e-24	up		TraesCS3D02G258300	0.334074	-1.58176	4.58601e-16	9.17307e-15	down
TraesCS5A02G031600	89.3472	6.48135	2.52843e-06	2.04851e-05	up		TraesCS3D02G258500	0.374796	-1.41582	1.67106e-16	3.43277e-15	down
TraesCS5A02G047900	2.17431	1.12056	0.000181133	0.00106201	up		TraesCS3D02G258900	0.49863	-1.00396	4.66336e-09	5.27728e-08	down
TraesCS5A02G049100	5.04502	2.33486	8.68775e-09	9.54398e-08	up		TraesCS3D02G260100	0.471892	-1.08347	1.04526e-12	1.65031e-11	down
TraesCS5A02G051000	4.65386	2.21843	2.4962e-25	8.09812e-24	up		TraesCS3D02G260300	0.276754	-1.85332	6.28849e-09	7.01204e-08	down
TraesCS5A02G061500	17.9125	4.1629	0.000763367	0.00389117	up		TraesCS3D02G260500	0.107567	-3.21669	0.00400716	0.0167893	down
TraesCS5A02G063100	6.37684	2.67284	5.15236e-113	1.30091e-110	up		TraesCS3D02G266400	0.335365	-1.5762	1.5816e-23	4.73919e-22	down
TraesCS5A02G063900	2.16556	1.11474	5.38343e-15	9.97764e-14	up		TraesCS3D02G267100	0.497781	-1.00642	0.00865283	0.0326424	down
TraesCS5A02G064600	3.43394	1.77987	9.8574e-09	1.07503e-07	up		TraesCS3D02G268200	0.243773	-2.03639	0.00205382	0.00934004	down
TraesCS5A02G070600	3.24119	1.69652	0.000228386	0.0013091	up		TraesCS3D02G271300	0.321532	-1.63697	9.85218e-06	7.27653e-05	down
TraesCS5A02G083600	3.03848	1.60335	1.19885e-17	2.64437e-16	up		TraesCS3D02G272600	0.210954	-2.245	6.75645e-10	8.3399e-09	down
TraesCS5A02G087100	5.23402	2.38792	5.79803e-20	1.45736e-18	up		TraesCS3D02G277600	0.381051	-1.39194	4.67289e-09	5.28711e-08	down
TraesCS5A02G089100	2.04816	1.03433	0.00549047	0.0220791	up		TraesCS3D02G279600	0.177701	-2.49247	6.03462e-05	0.000389824	down
TraesCS5A02G103900	2.14106	1.09833	0.00431279	0.0178885	up		TraesCS3D02G279800	0.392499	-1.34924	2.24878e-35	1.05114e-33	down
TraesCS5A02G107500	2.12651	1.08849	5.07399e-06	3.92853e-05	up		TraesCS3D02G286900	0.491452	-1.02488	4.01165e-14	7.02319e-13	down
TraesCS5A02G126100	2.20834	1.14296	0.000143148	0.000858958	up		TraesCS3D02G288600	0.0679356	-3.87969	5.69251e-06	4.37389e-05	down
TraesCS5A02G126200	7.00574	2.80854	4.133e-09	4.7126e-08	up		TraesCS3D02G289000	0.246437	-2.02071	1.45303e-36	7.12713e-35	down
TraesCS5A02G139900	2.78078	1.47549	0.000721674	0.00370316	up		TraesCS3D02G291100	0.115973	-3.10814	4.53837e-14	7.91607e-13	down
TraesCS5A02G142000	5.8967	2.55991	6.0511e-77	7.98266e-75	up		TraesCS3D02G293300	0.493517	-1.01883	0.00821338	0.0312598	down
TraesCS5A02G143100	4.64048	2.21428	6.19124e-29	2.33429e-27	up		TraesCS3D02G296000	0.489205	-1.03149	4.97856e-09	5.61953e-08	down
TraesCS5A02G143200	22.3769	4.48394	8.38776e-76	1.0788e-73	up		TraesCS3D02G296300	0.101998	-3.29339	0.000982858	0.00487214	down
TraesCS5A02G145800	4.23376	2.08194	2.12984e-06	1.74185e-05	up		TraesCS3D02G296600	0.231052	-2.11371	3.61635e-06	2.86218e-05	down
TraesCS5A02G147300	20.653	4.36828	0.00478354	0.019608	up		TraesCS3D02G298200	0.482727	-1.05072	2.34684e-05	0.000163167	down
TraesCS5A02G153000	2.6526	1.40741	0.0084592	0.0320407	up		TraesCS3D02G299900	0.119168	-3.06894	2.23818e-146	8.45937e-144	down
TraesCS5A02G154600	56.8551	5.82922	5.42682e-05	0.000353564	up		TraesCS3D02G302600	0.3393	-1.55937	1.18176e-14	2.14006e-13	down
TraesCS5A02G154800	2.04165	1.02974	0.000259766	0.00147158	up		TraesCS3D02G310200	0.399297	-1.32447	0.00756738	0.0291355	down
TraesCS5A02G159900	3.20745	1.68142	2.64428e-16	5.36758e-15	up		TraesCS3D02G310300	0.300009	-1.73692	1.46658e-38	7.63103e-37	down
TraesCS5A02G164900	2.42969	1.28077	0.00488506	0.0199664	up		TraesCS3D02G310800	0.193919	-2.36648	6.35167e-14	1.09733e-12	down
TraesCS5A02G172800	2.06501	1.04615	2.52906e-05	0.000174947	up		TraesCS3D02G315700	0.442864	-1.17506	4.34143e-50	3.14292e-48	down
TraesCS5A02G175200	3.13844	1.65005	6.69338e-08	6.61574e-07	up		TraesCS3D02G317300	0.119953	-3.05945	6.73981e-09	7.48547e-08	down
TraesCS5A02G178900	2.02067	1.01483	0.00283079	0.0124002	up		TraesCS3D02G320400	0.388345	-1.36459	1.26934e-18	2.97001e-17	down
TraesCS5A02G181400	12.1125	3.59842	1.84439e-11	2.62177e-10	up		TraesCS3D02G321700	0.0358564	-4.80162	4.42065e-13	7.17258e-12	down
TraesCS5A02G183600	6.85598	2.77736	3.74929e-72	4.49382e-70	up		TraesCS3D02G323100	0.0619793	-4.01207	4.0231e-114	1.03271e-111	down
TraesCS5A02G187300	16.7714	4.06793	0.00125137	0.006056	up		TraesCS3D02G324000	0.498365	-1.00473	0.00043211	0.00233648	down
TraesCS5A02G192700	2.29451	1.19818	1.06825e-12	1.68489e-11	up		TraesCS3D02G326200	0.474809	-1.07458	3.04502e-08	3.12919e-07	down
TraesCS5A02G193600	2.31068	1.20832	1.63201e-17	3.5641e-16	up		TraesCS3D02G327600	0.330589	-1.59689	2.36852e-08	2.47025e-07	down
TraesCS5A02G198200	2.77903	1.47458	1.25467e-21	3.47712e-20	up		TraesCS3D02G328100	0.46781	-1.096	1.7548e-21	4.8198e-20	down
TraesCS5A02G198400	8.08734	3.01567	8.93505e-06	6.66177e-05	up		TraesCS3D02G332200	0.364823	-1.45473	6.98294e-29	2.63118e-27	down
TraesCS5A02G198800	18.8204	4.23423	2.9164e-71	3.39642e-69	up		TraesCS3D02G332500	0.424069	-1.23763	0.0126015	0.0449478	down
TraesCS5A02G203200	2.64308	1.40222	0.00875594	0.0329663	up		TraesCS3D02G338100	0.183441	-2.44661	5.30689e-06	4.09598e-05	down
TraesCS5A02G206000	3.42386	1.77562	2.1744e-12	3.33645e-11	up		TraesCS3D02G340400	0.0795929	-3.65122	5.53416e-09	6.21025e-08	down
TraesCS5A02G210000	2.50531	1.32499	2.26754e-12	3.47416e-11	up		TraesCS3D02G342700	0.4132	-1.27509	0.00310208	0.0134556	down
TraesCS5A02G212800	4.84013	2.27505	1.12878e-111	2.81543e-109	up		TraesCS3D02G345800	0.304871	-1.71373	0.000303194	0.00169485	down
TraesCS5A02G215600	3.79817	1.9253	0.000200275	0.00116345	up		TraesCS3D02G346000	0.457813	-1.12717	9.93434e-16	1.94294e-14	down
TraesCS5A02G217400	7.03186	2.81391	6.62074e-08	6.5492e-07	up		TraesCS3D02G350700	0.349072	-1.5184	0.00621064	0.02458	down
TraesCS5A02G219000	4.14617	2.05178	1.24806e-42	7.4433e-41	up		TraesCS3D02G352100	0.419378	-1.25368	3.07409e-21	8.33563e-20	down
TraesCS5A02G219300	74.4551	6.2183	2.14498e-85	3.43236e-83	up		TraesCS3D02G353200	0.0331445	-4.91509	0.0039622	0.0166235	down
TraesCS5A02G219400	21.994	4.45904	4.26349e-284	5.8369e-281	up		TraesCS3D02G357000	0.118573	-3.07616	0.0138465	0.0486481	down
TraesCS5A02G219500	33.3479	5.05953	3.69444e-50	2.67768e-48	up		TraesCS3D02G357200	0.0535704	-4.22242	5.20552e-222	4.11149e-219	down
TraesCS5A02G219600	194.042	7.60023	4.37522e-10	5.48746e-09	up		TraesCS3D02G358300	0.457818	-1.12715	4.78129e-06	3.71498e-05	down
TraesCS5A02G219700	7.07702	2.82314	1.1085e-19	2.74373e-18	up		TraesCS3D02G359100	0.208273	-2.26345	9.86754e-07	8.43733e-06	down
TraesCS5A02G223100	2.45486	1.29564	4.43227e-10	5.55675e-09	up		TraesCS3D02G361800	0.382455	-1.38664	2.74431e-07	2.51441e-06	down
TraesCS5A02G227600	13.3438	3.73809	0.00453102	0.018688	up		TraesCS3D02G365200	0.363825	-1.45868	0.000375082	0.00205767	down
TraesCS5A02G228900	4.92538	2.30023	1.75326e-39	9.45824e-38	up		TraesCS3D02G366500	0.154135	-2.69774	5.01395e-39	2.65146e-37	down
TraesCS5A02G231600	5.06927	2.34178	1.99122e-07	1.85587e-06	up		TraesCS3D02G368600	0.378118	-1.40309	1.34102e-13	2.25852e-12	down
TraesCS5A02G237500	12.0739	3.59382	8.06232e-07	6.96335e-06	up		TraesCS3D02G369600	0.172563	-2.5348	0.000140306	0.00084371	down
TraesCS5A02G238800	2.15481	1.10756	0.00333052	0.0142885	up		TraesCS3D02G371700	0.312784	-1.67676	3.90381e-10	4.91423e-09	down
TraesCS5A02G241200	2.08543	1.06034	4.12654e-05	0.000274777	up		TraesCS3D02G374600	0.185098	-2.43364	2.3881e-12	3.6498e-11	down
TraesCS5A02G243500	7.04518	2.81664	4.91048e-10	6.13631e-09	up		TraesCS3D02G375200	0.331812	-1.59156	2.6161e-11	3.66712e-10	down
TraesCS5A02G247300	2.10415	1.07324	3.94377e-05	0.000263518	up		TraesCS3D02G375300	0.463227	-1.11021	1.39724e-11	2.01074e-10	down
TraesCS5A02G249900	5.59977	2.48537	4.83671e-17	1.02644e-15	up		TraesCS3D02G376600	0.3365	-1.57132	1.37738e-52	1.05674e-50	down
TraesCS5A02G253100	159.528	7.31767	9.96928e-09	1.08646e-07	up		TraesCS3D02G380500	0.0131569	-6.24803	1.46439e-05	0.000105221	down
TraesCS5A02G253900	2.01161	1.00835	0.00136369	0.00653949	up		TraesCS3D02G381400	0.208538	-2.26162	7.69219e-16	1.51597e-14	down
TraesCS5A02G257100	13.6487	3.77069	5.74146e-16	1.14175e-14	up		TraesCS3D02G382600	0.217636	-2.20001	0.00611771	0.0242578	down
TraesCS5A02G267000	2.83596	1.50384	7.73746e-19	1.8341e-17	up		TraesCS3D02G382800	0.488614	-1.03323	0.00806079	0.0307741	down
TraesCS5A02G267300	12.2198	3.61114	0.00988885	0.0365724	up		TraesCS3D02G383000	0.0933034	-3.42193	0.00586944	0.023409	down
TraesCS5A02G269300	2.62392	1.39172	3.88555e-10	4.89436e-09	up		TraesCS3D02G385700	0.400133	-1.32145	0.00396203	0.0166235	down
TraesCS5A02G271100	4.45976	2.15697	0.00144773	0.00689262	up		TraesCS3D02G385800	0.402832	-1.31175	2.18613e-16	4.45522e-15	down
TraesCS5A02G271700	2.24687	1.16792	0.00247754	0.0110006	up		TraesCS3D02G392600	0.366603	-1.44771	9.89899e-109	2.38221e-106	down
TraesCS5A02G275400	2.31282	1.20965	0.00273789	0.01203	up		TraesCS3D02G398900	0.395788	-1.3372	0.00142881	0.00681482	down
TraesCS5A02G278500	73.3062	6.19586	7.07424e-06	5.35146e-05	up		TraesCS3D02G399100	0.46983	-1.08979	5.49892e-25	1.75712e-23	down
TraesCS5A02G278600	22.8016	4.51107	4.62012e-15	8.60695e-14	up		TraesCS3D02G399600	0.124471	-3.00612	8.76251e-08	8.55247e-07	down
TraesCS5A02G278700	155.01	7.27622	4.07581e-09	4.64997e-08	up		TraesCS3D02G401400	0.484885	-1.04429	1.38436e-07	1.31331e-06	down
TraesCS5A02G280700	4.3513	2.12145	9.82264e-76	1.26071e-73	up		TraesCS3D02G402900	0.293551	-1.76832	6.89881e-10	8.50616e-09	down
TraesCS5A02G281300	2.10444	1.07344	0.00834323	0.0316757	up		TraesCS3D02G403600	0.281533	-1.82862	1.47832e-07	1.39793e-06	down
TraesCS5A02G285900	2.56396	1.35838	2.88999e-05	0.000197804	up		TraesCS3D02G408100	0.367262	-1.44512	3.2272e-36	1.55936e-34	down
TraesCS5A02G291200	5.63699	2.49492	1.2614e-56	1.10228e-54	up		TraesCS3D02G414300	0.0130913	-6.25525	1.14598e-08	1.24078e-07	down
TraesCS5A02G292000	153.035	7.25772	8.13826e-43	4.87244e-41	up		TraesCS3D02G415400	0.360136	-1.47339	7.12027e-06	5.38363e-05	down
TraesCS5A02G294800	3.42921	1.77787	0.00187953	0.00865025	up		TraesCS3D02G416800	0.166048	-2.59033	0.00207567	0.0094217	down
TraesCS5A02G295100	4.37703	2.12995	1.17485e-70	1.35287e-68	up		TraesCS3D02G417500	0.368512	-1.44022	2.57787e-21	7.01789e-20	down
TraesCS5A02G304594	44.8142	5.48588	0.0002493	0.00141633	up		TraesCS3D02G418300	0.325711	-1.61834	0.000904449	0.00452423	down
TraesCS5A02G306700	44.7717	5.48451	0.000223462	0.00128326	up		TraesCS3D02G422100	0.287082	-1.80047	0.00536175	0.0216236	down
TraesCS5A02G312500	5.22318	2.38493	5.14003e-09	5.79225e-08	up		TraesCS3D02G422900	0.0878405	-3.50897	4.40447e-13	7.14821e-12	down
TraesCS5A02G314500	4.9392	2.30428	0.00882457	0.0331882	up		TraesCS3D02G426300	0.314622	-1.66831	4.52861e-84	7.1354e-82	down
TraesCS5A02G319200	65.586	6.03532	3.01429e-05	0.00020565	up		TraesCS3D02G429600	0.201439	-2.31159	0.000221181	0.00127159	down
TraesCS5A02G319900	3.55979	1.83179	2.96767e-81	4.38439e-79	up		TraesCS3D02G429700	0.0227879	-5.45559	1.00191e-18	2.3568e-17	down
TraesCS5A02G321800	2.50508	1.32486	0.01275	0.0453544	up		TraesCS3D02G429900	0.0981881	-3.34831	1.77138e-14	3.17053e-13	down
TraesCS5A02G323900	2.97993	1.57528	0.00714608	0.0277794	up		TraesCS3D02G430100	0.456792	-1.13039	1.15817e-07	1.11226e-06	down
TraesCS5A02G332000	22.3877	4.48463	0.0128677	0.0457034	up		TraesCS3D02G430200	0.240937	-2.05327	3.89259e-17	8.30945e-16	down
TraesCS5A02G332600	11.7821	3.55852	5.58172e-05	0.000362468	up		TraesCS3D02G431700	0.285037	-1.81078	3.15243e-32	1.33113e-30	down
TraesCS5A02G333900	3.89287	1.96084	0.0072988	0.0282768	up		TraesCS3D02G435200	0.0165785	-5.91454	8.27661e-06	6.20086e-05	down
TraesCS5A02G335400	4.66718	2.22255	0.00175528	0.00814965	up		TraesCS3D02G440100	0.459792	-1.12095	0.0074577	0.028789	down
TraesCS5A02G337100	2.09419	1.06639	1.56615e-26	5.41144e-25	up		TraesCS3D02G440200	0.0972861	-3.36162	1.71315e-300	2.85249e-297	down
TraesCS5A02G339600	5.91029	2.56323	0.00891536	0.0334663	up		TraesCS3D02G444700	0.42529	-1.23348	0.00326586	0.0140461	down
TraesCS5A02G339700	13.3904	3.74313	0.000109077	0.000672128	up		TraesCS3D02G449100	0.100916	-3.30878	3.5535e-11	4.9251e-10	down
TraesCS5A02G343000	4.78747	2.25926	1.7558e-07	1.64416e-06	up		TraesCS3D02G450600	0.326664	-1.61412	0.00341837	0.0146054	down
TraesCS5A02G357600	4.17239	2.06087	0.00809865	0.0308899	up		TraesCS3D02G451400	0.245915	-2.02377	0.000607278	0.00316573	down
TraesCS5A02G365800	2.64678	1.40424	3.36084e-23	9.89257e-22	up		TraesCS3D02G451500	0.280984	-1.83144	0.00814513	0.0310364	down
TraesCS5A02G367700	2.25119	1.17069	1.08273e-21	3.00466e-20	up		TraesCS3D02G451800	0.168941	-2.5654	0.000622155	0.00323753	down
TraesCS5A02G373500	2.42518	1.27809	2.07267e-09	2.43731e-08	up		TraesCS3D02G455200	0.432833	-1.20812	0.0117004	0.0421783	down
TraesCS5A02G374000	7.55608	2.91764	2.20236e-41	1.26097e-39	up		TraesCS3D02G456200	0.371376	-1.42905	7.11673e-41	3.9822e-39	down
TraesCS5A02G375700	2.18055	1.12469	0.00656559	0.0258038	up		TraesCS3D02G458600	0.0294452	-5.08582	0.00220274	0.00992714	down
TraesCS5A02G376100	2.26926	1.18222	1.39356e-09	1.66738e-08	up		TraesCS3D02G467300	0.0889866	-3.49027	1.52396e-12	2.37268e-11	down
TraesCS5A02G379300	3.27189	1.71013	8.57646e-07	7.3836e-06	up		TraesCS3D02G467600	0.0348032	-4.84463	1.02789e-304	1.8093e-301	down
TraesCS5A02G391200	2.26931	1.18225	1.00472e-12	1.58916e-11	up		TraesCS3D02G471100	0.373722	-1.41996	0.000669144	0.00345809	down
TraesCS5A02G391500	41.4109	5.37194	2.52197e-77	3.363e-75	up		TraesCS3D02G475000	0.0828105	-3.59404	7.56953e-48	5.19884e-46	down
TraesCS5A02G393900	3.84812	1.94415	3.36318e-19	8.11893e-18	up		TraesCS3D02G475100	0.0401779	-4.63746	0.000175489	0.00103162	down
TraesCS5A02G398900	2.58661	1.37106	7.01094e-43	4.20567e-41	up		TraesCS3D02G475200	0.226428	-2.14288	1.44701e-113	3.68372e-111	down
TraesCS5A02G403600	2.05265	1.03749	8.72592e-14	1.49493e-12	up		TraesCS3D02G475600	0.364397	-1.45642	4.31023e-05	0.000285958	down
TraesCS5A02G403800	2.15159	1.10541	4.87954e-05	0.000320723	up		TraesCS3D02G476500	0.161343	-2.6318	8.33862e-39	4.39075e-37	down
TraesCS5A02G412100	2.11197	1.07859	0.000820426	0.00414771	up		TraesCS3D02G477300	0.479937	-1.05908	1.98111e-15	3.77865e-14	down
TraesCS5A02G414200	2.69734	1.43154	2.44639e-06	1.98544e-05	up		TraesCS3D02G477700	0.345399	-1.53366	3.54669e-16	7.12435e-15	down
TraesCS5A02G421800	44.0055	5.45961	0.000209383	0.00121144	up		TraesCS3D02G478000	0.00374913	-8.05923	1.22625e-10	1.62568e-09	down
TraesCS5A02G427600	2.64994	1.40596	2.34427e-07	2.16624e-06	up		TraesCS3D02G478300	0.0469631	-4.41233	0.00619918	0.0245382	down
TraesCS5A02G432600	3.15273	1.6566	2.55181e-08	2.65153e-07	up		TraesCS3D02G478500	0.209957	-2.25183	2.18044e-22	6.21611e-21	down
TraesCS5A02G441300	4.43173	2.14787	1.03888e-27	3.73844e-26	up		TraesCS3D02G481400	0.415305	-1.26776	0.00468995	0.0192635	down
TraesCS5A02G442900	2.95693	1.5641	3.13193e-08	3.21474e-07	up		TraesCS3D02G483400	0.461527	-1.11551	1.41882e-07	1.34476e-06	down
TraesCS5A02G443800	3.70874	1.89093	3.1825e-12	4.82442e-11	up		TraesCS3D02G484000	0.482144	-1.05246	3.61679e-21	9.76849e-20	down
TraesCS5A02G444900	3.02358	1.59626	0.0072432	0.0280896	up		TraesCS3D02G485900	0.0502971	-4.31338	0.00590982	0.0235395	down
TraesCS5A02G460600	5.89091	2.55849	0.006072	0.0241027	up		TraesCS3D02G486200	0.394538	-1.34177	1.05212e-05	7.733e-05	down
TraesCS5A02G461100	2.98013	1.57538	1.12191e-17	2.48088e-16	up		TraesCS3D02G491900	0.16233	-2.623	0.0105554	0.0386478	down
TraesCS5A02G463400	2.35907	1.23822	3.38076e-24	1.0482e-22	up		TraesCS3D02G493700	0.429595	-1.21895	0.00199308	0.00909874	down
TraesCS5A02G463500	3.27873	1.71314	0.000262585	0.00148536	up		TraesCS3D02G499900	0.0929078	-3.42806	1.02901e-08	1.11885e-07	down
TraesCS5A02G472600	2.20823	1.14289	3.21242e-05	0.000218008	up		TraesCS3D02G500000	0.323334	-1.6289	2.11616e-12	3.24951e-11	down
TraesCS5A02G495500	160.299	7.32462	5.67912e-33	2.45181e-31	up		TraesCS3D02G500100	0.381694	-1.38951	2.98315e-18	6.84735e-17	down
TraesCS5A02G498800	3.43286	1.77941	1.61521e-15	3.10769e-14	up		TraesCS3D02G500600	0.146946	-2.76664	9.06739e-89	1.53466e-86	down
TraesCS5A02G500100	2.49178	1.31718	8.46715e-07	7.2946e-06	up		TraesCS3D02G501800	0.436663	-1.19541	0.000742463	0.00379719	down
TraesCS5A02G502000	2.03472	1.02483	0.000248378	0.00141187	up		TraesCS3D02G508500	0.2504	-1.99769	3.97918e-21	1.0705e-19	down
TraesCS5A02G504900	8.00011	3.00002	0.00165565	0.00774436	up		TraesCS3D02G508800	0.288349	-1.79411	3.69788e-12	5.57823e-11	down
TraesCS5A02G505800	6.49633	2.69962	3.73832e-70	4.26493e-68	up		TraesCS3D02G508900	0.203739	-2.29521	5.25586e-15	9.75002e-14	down
TraesCS5A02G508500	5.17413	2.37132	2.51187e-27	8.92436e-26	up		TraesCS3D02G509100	0.388175	-1.36522	2.33565e-21	6.37821e-20	down
TraesCS5A02G508800	32.2257	5.01014	1.54342e-05	0.000110449	up		TraesCS3D02G513800	0.042587	-4.55344	2.16209e-20	5.57322e-19	down
TraesCS5A02G513200	5.05192	2.33683	2.01382e-19	4.91543e-18	up		TraesCS3D02G522200	0.207731	-2.26721	9.84474e-08	9.55126e-07	down
[truncated: 2,459 more rows]

## Sheet: N0_1W vs. N1_1W
Up-regulated							Down-regulated
Gene	FoldChange	Log2FoldChange	pval	padj	Up/Down		Gene	FoldChange	Log2FoldChange	pval	padj	Up/Down
ENSRNA050009491	2.02229	1.01599	0.00785221	0.0293719	up		ENSRNA050013955	0.443268	-1.17375	0.0107313	0.0383251	down
ENSRNA050013789	29.5343	4.88432	0.00325298	0.0137151	up		ENSRNA050024590	0.258206	-1.9534	0.00661887	0.0253857	down
ENSRNA050016305	8.97172	3.16538	0.00816737	0.0303809	up		TraesCS1A02G007800	0.168245	-2.57137	3.42508e-05	0.000225957	down
ENSRNA050018911	19.7158	4.30128	0.00434753	0.0176925	up		TraesCS1A02G015900	0.451161	-1.14828	1.15055e-18	2.65805e-17	down
ENSRNA050022801	2.01177	1.00846	0.0031172	0.0132076	up		TraesCS1A02G020300	0.46678	-1.09918	0.0110994	0.0394546	down
TraesCS1A02G000100	2.90235	1.53722	0.00654115	0.0251353	up		TraesCS1A02G020900	0.435901	-1.19793	0.0018995	0.00855957	down
TraesCS1A02G005500	6.62802	2.72858	3.40373e-10	4.30611e-09	up		TraesCS1A02G021200	0.0292393	-5.09595	1.00755e-07	9.68433e-07	down
TraesCS1A02G006300	4.21054	2.074	4.90629e-10	6.12049e-09	up		TraesCS1A02G023200	0.0540805	-4.20875	0.00604946	0.0235447	down
TraesCS1A02G006800	3.73527	1.90121	8.81766e-28	3.10516e-26	up		TraesCS1A02G027200	0.405526	-1.30213	0.0105192	0.0376781	down
TraesCS1A02G008600	56.8473	5.82902	4.50676e-05	0.000290945	up		TraesCS1A02G027300	0.054932	-4.18621	0.00681317	0.0260146	down
TraesCS1A02G017900	2.84722	1.50956	4.84599e-30	1.87947e-28	up		TraesCS1A02G027600	0.326014	-1.617	3.42389e-07	3.08074e-06	down
TraesCS1A02G018500	2.24231	1.16498	4.18772e-07	3.71799e-06	up		TraesCS1A02G029200	0.462715	-1.1118	0.00105777	0.00509599	down
TraesCS1A02G025500	3.20604	1.68079	1.03466e-39	5.50843e-38	up		TraesCS1A02G030000	0.425535	-1.23265	9.50041e-39	4.89102e-37	down
TraesCS1A02G029300	2.18511	1.1277	1.15306e-84	1.67061e-82	up		TraesCS1A02G032900	0.0103618	-6.59258	8.45752e-07	7.19498e-06	down
TraesCS1A02G030900	2.28557	1.19255	0.000396091	0.00210819	up		TraesCS1A02G040500	0.391717	-1.35212	0.00148295	0.00687967	down
TraesCS1A02G035600	2.16964	1.11746	0.00174749	0.00794703	up		TraesCS1A02G057200	0.379475	-1.39792	3.22425e-17	6.81257e-16	down
TraesCS1A02G037800	15.8017	3.98201	0.013359	0.0461807	up		TraesCS1A02G058300	0.361481	-1.46801	0.00428251	0.0174618	down
TraesCS1A02G039100	2.06245	1.04436	5.28496e-05	0.000337107	up		TraesCS1A02G059100	0.21468	-2.21974	0.000729669	0.00364907	down
TraesCS1A02G046400	6.45786	2.69106	5.69407e-62	5.30621e-60	up		TraesCS1A02G063300	0.351282	-1.5093	0.00901318	0.0330423	down
TraesCS1A02G050100	2.40919	1.26855	5.24478e-11	7.13197e-10	up		TraesCS1A02G065300	0.38582	-1.374	1.4351e-29	5.44103e-28	down
TraesCS1A02G058900	3.29077	1.71843	3.00359e-23	8.64182e-22	up		TraesCS1A02G068400	0.233742	-2.09701	4.43527e-09	4.99806e-08	down
TraesCS1A02G059200	10.332	3.36905	5.32071e-41	2.93808e-39	up		TraesCS1A02G068500	0.0393572	-4.66723	0.00661806	0.0253843	down
TraesCS1A02G061700	2.66872	1.41615	2.43913e-09	2.83744e-08	up		TraesCS1A02G070900	0.0373163	-4.74405	1.65904e-13	2.78193e-12	down
TraesCS1A02G066300	3.35589	1.7467	0.0058834	0.0229837	up		TraesCS1A02G072000	0.370135	-1.43388	1.90491e-44	1.16034e-42	down
TraesCS1A02G069300	6.89521	2.78559	8.15687e-13	1.29734e-11	up		TraesCS1A02G073100	0.356199	-1.48925	0.00642384	0.0247627	down
TraesCS1A02G070200	24.1876	4.59619	0.00821856	0.0305545	up		TraesCS1A02G073300	0.210584	-2.24753	5.51456e-24	1.64094e-22	down
TraesCS1A02G076500	7.89578	2.98108	1.96868e-14	3.52452e-13	up		TraesCS1A02G074800	0.369484	-1.43641	2.08501e-25	6.56035e-24	down
TraesCS1A02G082500	2.01217	1.00875	0.000191291	0.00109013	up		TraesCS1A02G075800	0.11179	-3.16114	7.68303e-21	1.97186e-19	down
TraesCS1A02G084600	2.57229	1.36305	0.00577418	0.0226078	up		TraesCS1A02G076700	0.00101504	-9.94425	1.27723e-42	7.45891e-41	down
TraesCS1A02G084800	7.44593	2.89645	4.95133e-09	5.54775e-08	up		TraesCS1A02G078800	0.135493	-2.88371	0	0	down
TraesCS1A02G089500	5.39526	2.43169	4.77838e-244	4.76679e-241	up		TraesCS1A02G081300	0.48026	-1.05811	7.6459e-20	1.8693e-18	down
TraesCS1A02G089600	3.8705	1.95252	2.72432e-249	2.90842e-246	up		TraesCS1A02G083000	0.0950412	-3.3953	2.02479e-15	3.8661e-14	down
TraesCS1A02G098900	10.4862	3.39043	4.53137e-11	6.19926e-10	up		TraesCS1A02G085600	0.382373	-1.38695	4.80051e-30	1.86301e-28	down
TraesCS1A02G103900	2.7662	1.46791	2.97589e-51	2.16873e-49	up		TraesCS1A02G097000	0.498281	-1.00497	2.66297e-31	1.07458e-29	down
TraesCS1A02G105800	2.42561	1.27835	5.7543e-08	5.68812e-07	up		TraesCS1A02G101300	0.48315	-1.04946	0.000506127	0.00263215	down
TraesCS1A02G107700	108.138	6.75673	2.32773e-10	2.98897e-09	up		TraesCS1A02G102700	0.0687526	-3.86244	2.4383e-13	4.04513e-12	down
TraesCS1A02G109000	3.56627	1.83442	0.00829711	0.0307882	up		TraesCS1A02G102800	0.191622	-2.38367	5.53779e-32	2.29242e-30	down
TraesCS1A02G116900	7.17632	2.84324	1.85242e-104	3.69584e-102	up		TraesCS1A02G106700	0.311977	-1.68049	0.00618066	0.0239772	down
TraesCS1A02G117700	3.59642	1.84656	4.83324e-24	1.44173e-22	up		TraesCS1A02G109400	0.0599996	-4.0589	0.00931297	0.0339674	down
TraesCS1A02G117900	73.5905	6.20145	2.67829e-26	8.77648e-25	up		TraesCS1A02G110800	0.445572	-1.16627	1.81663e-08	1.90202e-07	down
TraesCS1A02G121700	2.22276	1.15235	3.40338e-15	6.40589e-14	up		TraesCS1A02G112500	0.413193	-1.27511	1.43637e-83	2.02798e-81	down
TraesCS1A02G122800	2.17762	1.12276	0.000880439	0.00432452	up		TraesCS1A02G113300	0.232388	-2.10539	5.85393e-17	1.22498e-15	down
TraesCS1A02G146000	7.63695	2.933	0.00152097	0.0070346	up		TraesCS1A02G113600	0.350206	-1.51372	9.71686e-05	0.000586889	down
TraesCS1A02G149700	3.62195	1.85677	1.44143e-35	6.74722e-34	up		TraesCS1A02G114000	0.309029	-1.69418	0.00569336	0.0223489	down
TraesCS1A02G161000	9.82365	3.29626	0.00172791	0.0078691	up		TraesCS1A02G115400	0.191662	-2.38336	9.05318e-08	8.75285e-07	down
TraesCS1A02G163000	9.43633	3.23823	2.81658e-07	2.56348e-06	up		TraesCS1A02G116200	0.290282	-1.78447	1.61895e-05	0.000113185	down
TraesCS1A02G170000	2.08911	1.06289	2.22623e-50	1.5863e-48	up		TraesCS1A02G119600	0.264404	-1.91918	4.11681e-09	4.6625e-08	down
TraesCS1A02G170900	2.05193	1.03698	0.000347473	0.00187069	up		TraesCS1A02G119800	0.290766	-1.78207	0.000748263	0.00373224	down
TraesCS1A02G173000	37.4757	5.22788	0.000128673	0.000759903	up		TraesCS1A02G121200	0.303002	-1.7226	0.000249066	0.00138123	down
TraesCS1A02G173800	3.13969	1.65062	2.34917e-08	2.42868e-07	up		TraesCS1A02G121800	0.381801	-1.38911	2.68712e-48	1.81685e-46	down
TraesCS1A02G177000	2.526	1.33686	9.48692e-27	3.17895e-25	up		TraesCS1A02G122600	0.147821	-2.75807	0.00429066	0.0174915	down
TraesCS1A02G179600	2.64177	1.4015	3.64607e-68	3.82536e-66	up		TraesCS1A02G123100	0.212698	-2.23312	4.76552e-07	4.19913e-06	down
TraesCS1A02G185500	2.44911	1.29226	0.0031071	0.0131703	up		TraesCS1A02G124200	0.322338	-1.63335	0.00268123	0.0115731	down
TraesCS1A02G186700	2.61453	1.38655	1.53862e-11	2.18911e-10	up		TraesCS1A02G125400	0.22012	-2.18364	3.10548e-19	7.35597e-18	down
TraesCS1A02G188000	13.5615	3.76144	9.33914e-110	2.01527e-107	up		TraesCS1A02G125500	0.293709	-1.76754	1.74129e-32	7.36351e-31	down
TraesCS1A02G188900	3.07692	1.62149	2.08229e-28	7.51552e-27	up		TraesCS1A02G125900	0.365052	-1.45383	3.64652e-06	2.8199e-05	down
TraesCS1A02G192800	2.44722	1.29114	3.29324e-40	1.77032e-38	up		TraesCS1A02G126100	0.103035	-3.27879	0.0014788	0.00686353	down
TraesCS1A02G193100	6.24013	2.64158	7.01257e-15	1.29429e-13	up		TraesCS1A02G127500	0.0418471	-4.57873	0.00170747	0.00778492	down
TraesCS1A02G193200	3.88872	1.9593	7.47274e-109	1.60117e-106	up		TraesCS1A02G129400	0.0346129	-4.85254	0.00293323	0.0125197	down
TraesCS1A02G193400	4.40978	2.14071	3.93654e-12	5.90154e-11	up		TraesCS1A02G145600	0.290214	-1.78481	3.68075e-05	0.000241593	down
TraesCS1A02G194200	135.401	7.0811	3.99559e-08	4.02949e-07	up		TraesCS1A02G147400	0.327628	-1.60987	6.53224e-05	0.000408614	down
TraesCS1A02G195500	4.67846	2.22603	6.21015e-49	4.27489e-47	up		TraesCS1A02G149300	0.136062	-2.87767	1.89756e-07	1.76452e-06	down
TraesCS1A02G195700	2.47834	1.30937	6.6264e-72	7.56528e-70	up		TraesCS1A02G151600	0.347474	-1.52502	0.00127793	0.00603198	down
TraesCS1A02G199700	10.4187	3.3811	0.013146	0.0455767	up		TraesCS1A02G157900	0.0936891	-3.41597	8.7495e-39	4.51973e-37	down
TraesCS1A02G202300	2.0237	1.01699	2.00542e-43	1.19407e-41	up		TraesCS1A02G159200	0.410873	-1.28324	1.51346e-13	2.54131e-12	down
TraesCS1A02G203600	2.87956	1.52585	4.27085e-08	4.29074e-07	up		TraesCS1A02G159500	0.358656	-1.47933	0.00034166	0.00184291	down
TraesCS1A02G206800	7.67821	2.94077	1.32876e-80	1.79285e-78	up		TraesCS1A02G162200	0.46272	-1.11179	0.0100817	0.0363208	down
TraesCS1A02G207300	26.4321	4.72422	0.00724124	0.0274288	up		TraesCS1A02G164600	0.072357	-3.78872	3.43082e-27	1.17025e-25	down
TraesCS1A02G209000	33.0932	5.04846	0.00150932	0.0069889	up		TraesCS1A02G166600	0.0475299	-4.39502	5.85012e-10	7.24591e-09	down
TraesCS1A02G209100	18.7287	4.22718	0	0	up		TraesCS1A02G168600	0.232736	-2.10323	1.1081e-86	1.66494e-84	down
TraesCS1A02G210400	4.53979	2.18262	8.58778e-20	2.09536e-18	up		TraesCS1A02G174500	0.485044	-1.04381	0.0109358	0.0389457	down
TraesCS1A02G211500	2.96769	1.56934	3.80839e-31	1.52969e-29	up		TraesCS1A02G175200	0.458504	-1.12499	1.58424e-22	4.392e-21	down
TraesCS1A02G215800	2.07923	1.05605	2.18047e-06	1.74472e-05	up		TraesCS1A02G179400	0.0339544	-4.88026	1.88233e-110	4.15014e-108	down
TraesCS1A02G218100	4.80364	2.26413	4.73194e-13	7.68066e-12	up		TraesCS1A02G180000	0.291857	-1.77667	7.26479e-06	5.36892e-05	down
TraesCS1A02G218500	2.81227	1.49174	1.42015e-11	2.02814e-10	up		TraesCS1A02G182200	0.264798	-1.91704	3.956e-07	3.52249e-06	down
TraesCS1A02G220100	3.04767	1.6077	3.8413e-19	9.0601e-18	up		TraesCS1A02G182500	0.392577	-1.34895	8.51846e-05	0.000520238	down
TraesCS1A02G221000	4.11545	2.04105	0.00130663	0.00615459	up		TraesCS1A02G186400	0.202207	-2.3061	1.52436e-51	1.12029e-49	down
TraesCS1A02G238800	2.85095	1.51144	4.63341e-50	3.27852e-48	up		TraesCS1A02G186600	0.0312026	-5.00219	1.93585e-05	0.000133636	down
TraesCS1A02G239500	6.34712	2.6661	1.25375e-16	2.5662e-15	up		TraesCS1A02G187000	0.211335	-2.2424	5.81383e-18	1.29165e-16	down
TraesCS1A02G239600	3.06945	1.61798	5.10686e-33	2.1931e-31	up		TraesCS1A02G187700	0.198255	-2.33457	0.00289412	0.0123718	down
TraesCS1A02G242100	2.87428	1.5232	1.2787e-10	1.67769e-09	up		TraesCS1A02G190200	0.454675	-1.13709	0.0116039	0.0409987	down
TraesCS1A02G243000	2.12224	1.08559	1.64511e-06	1.34211e-05	up		TraesCS1A02G201500	0.486476	-1.03956	0.0111706	0.0396565	down
TraesCS1A02G246500	2.10531	1.07403	2.64834e-08	2.71949e-07	up		TraesCS1A02G201700	0.37181	-1.42736	3.9254e-08	3.96265e-07	down
TraesCS1A02G248300	4.79491	2.2615	3.61361e-117	8.97533e-115	up		TraesCS1A02G202200	0.0387814	-4.68849	0.00665824	0.0255182	down
TraesCS1A02G249000	3.32445	1.73312	0.00392479	0.016191	up		TraesCS1A02G203700	0.0364512	-4.77789	0.00431726	0.0175846	down
TraesCS1A02G255100	2.45929	1.29824	7.5978e-62	7.03716e-60	up		TraesCS1A02G213700	0.0158918	-5.97557	4.41571e-06	3.37626e-05	down
TraesCS1A02G255400	2.22593	1.15441	5.44202e-39	2.83526e-37	up		TraesCS1A02G213800	0.235585	-2.08568	0.00403077	0.016554	down
TraesCS1A02G256800	2.61991	1.38952	0.00370561	0.0153879	up		TraesCS1A02G219800	0.42782	-1.22493	0.0118641	0.0417751	down
TraesCS1A02G257000	5.97181	2.57817	4.21818e-07	3.74285e-06	up		TraesCS1A02G220000	0.0530292	-4.23707	0.00606982	0.0236134	down
TraesCS1A02G257200	2.70363	1.4349	8.27061e-05	0.000506886	up		TraesCS1A02G228500	0.408365	-1.29207	8.10448e-14	1.38805e-12	down
TraesCS1A02G257500	4.49622	2.16871	1.46807e-12	2.2807e-11	up		TraesCS1A02G229300	0.0714331	-3.80726	0.00387486	0.0160077	down
TraesCS1A02G259200	3.53811	1.82298	1.18834e-69	1.30293e-67	up		TraesCS1A02G229500	0.144384	-2.79202	2.05398e-05	0.000141166	down
TraesCS1A02G259500	3.23744	1.69485	3.34595e-24	1.00349e-22	up		TraesCS1A02G229900	0.255338	-1.96952	0.000144388	0.000843135	down
TraesCS1A02G264300	2.41294	1.27079	1.89808e-15	3.63099e-14	up		TraesCS1A02G235000	0.453821	-1.13981	0.00307544	0.0130498	down
TraesCS1A02G264400	4.31977	2.11095	3.71154e-37	1.82141e-35	up		TraesCS1A02G235800	0.355687	-1.49132	1.9785e-08	2.06157e-07	down
TraesCS1A02G269500	3.02397	1.59644	4.3871e-22	1.19876e-20	up		TraesCS1A02G238700	0.359878	-1.47442	1.02143e-38	5.24079e-37	down
TraesCS1A02G269600	3.0079	1.58875	3.72305e-19	8.78461e-18	up		TraesCS1A02G245400	0.151348	-2.72406	0.000831185	0.00410713	down
TraesCS1A02G270700	2.14009	1.09767	8.72486e-41	4.77451e-39	up		TraesCS1A02G246600	0.464127	-1.10741	6.38391e-08	6.27988e-07	down
TraesCS1A02G270900	4.98957	2.31892	8.73711e-07	7.41418e-06	up		TraesCS1A02G247700	0.217628	-2.20007	0.000341308	0.00184141	down
TraesCS1A02G271000	3.02396	1.59644	4.38701e-13	7.13983e-12	up		TraesCS1A02G250700	0.123868	-3.01313	0.00595438	0.0232225	down
TraesCS1A02G273600	3.24272	1.6972	1.4319e-10	1.87103e-09	up		TraesCS1A02G251900	0.387965	-1.366	2.28486e-07	2.10441e-06	down
TraesCS1A02G277400	5.14605	2.36347	2.28036e-17	4.86041e-16	up		TraesCS1A02G253000	0.470816	-1.08677	0.000237248	0.00132195	down
TraesCS1A02G278600	2.92492	1.5484	3.29965e-48	2.22113e-46	up		TraesCS1A02G258800	0.31754	-1.65499	1.41885e-13	2.38838e-12	down
TraesCS1A02G278800	6.65465	2.73436	2.32891e-87	3.54297e-85	up		TraesCS1A02G259100	0.319408	-1.64653	0.000120344	0.000715015	down
TraesCS1A02G278900	4.68455	2.22791	5.22001e-43	3.07798e-41	up		TraesCS1A02G259900	0.38792	-1.36617	1.83535e-08	1.92096e-07	down
TraesCS1A02G280600	2.0336	1.02403	1.47048e-16	2.99771e-15	up		TraesCS1A02G261200	0.0410132	-4.60777	0.00165922	0.00759205	down
TraesCS1A02G282600	10.7609	3.42773	0.0141312	0.0484104	up		TraesCS1A02G265200	0.390398	-1.35698	3.17575e-10	4.03025e-09	down
TraesCS1A02G283100	4.6085	2.2043	3.45015e-65	3.42494e-63	up		TraesCS1A02G268400	0.195829	-2.35233	1.52838e-56	1.2671e-54	down
TraesCS1A02G285600	2.11801	1.08271	0.000793408	0.00393388	up		TraesCS1A02G273200	0.117179	-3.09321	2.02319e-05	0.000139176	down
TraesCS1A02G289300	4.58528	2.19701	2.79163e-07	2.54192e-06	up		TraesCS1A02G273800	0.192455	-2.37741	0.00738556	0.0278783	down
TraesCS1A02G289600	5.20127	2.37886	6.93128e-06	5.14431e-05	up		TraesCS1A02G273900	0.237547	-2.07372	9.17543e-86	1.3552e-83	down
TraesCS1A02G289700	4.39849	2.13701	1.48672e-05	0.000104752	up		TraesCS1A02G279500	0.385588	-1.37487	6.51236e-16	1.27753e-14	down
TraesCS1A02G289900	11.2209	3.48811	6.67492e-62	6.20125e-60	up		TraesCS1A02G281000	0.472471	-1.0817	1.49784e-05	0.000105469	down
TraesCS1A02G290100	5.69122	2.50874	1.09565e-54	8.7382e-53	up		TraesCS1A02G284900	0.043006	-4.53932	5.77598e-06	4.34569e-05	down
TraesCS1A02G290200	8.11174	3.02001	1.13501e-13	1.92122e-12	up		TraesCS1A02G287200	0.104147	-3.2633	1.61268e-84	2.3145e-82	down
TraesCS1A02G291100	27.9149	4.80297	0.0043224	0.017602	up		TraesCS1A02G291200	0.489536	-1.03051	2.33236e-27	8.02763e-26	down
TraesCS1A02G292000	2.66074	1.41183	0.00111796	0.00535419	up		TraesCS1A02G297400	0.120636	-3.05126	6.19415e-12	9.11552e-11	down
TraesCS1A02G296300	2.23601	1.16092	1.61554e-26	5.37207e-25	up		TraesCS1A02G297500	0.191194	-2.38689	3.17249e-49	2.2038e-47	down
TraesCS1A02G300600	3.5485	1.82721	2.3601e-11	3.2985e-10	up		TraesCS1A02G298600	0.238429	-2.06837	4.30262e-53	3.28099e-51	down
TraesCS1A02G301100	176.309	7.46197	1.22592e-09	1.47024e-08	up		TraesCS1A02G299100	0.327231	-1.61162	1.12177e-08	1.20498e-07	down
TraesCS1A02G302600	2.26635	1.18037	8.89845e-41	4.86512e-39	up		TraesCS1A02G301800	0.486476	-1.03956	0.00448722	0.0181856	down
TraesCS1A02G303100	4.64786	2.21657	8.49698e-25	2.60746e-23	up		TraesCS1A02G304000	0.320388	-1.64211	0.000346427	0.00186572	down
TraesCS1A02G304900	15.0894	3.91547	1.55196e-05	0.00010894	up		TraesCS1A02G305400	0.301081	-1.73178	1.87633e-24	5.68051e-23	down
TraesCS1A02G305300	3.28143	1.71432	6.05135e-07	5.26053e-06	up		TraesCS1A02G308700	0.499035	-1.00279	1.91156e-05	0.000132079	down
TraesCS1A02G307800	2.10827	1.07606	1.12257e-18	2.59441e-17	up		TraesCS1A02G309700	0.145453	-2.78137	3.25079e-07	2.93236e-06	down
TraesCS1A02G308000	2.44863	1.29198	1.03165e-09	1.24485e-08	up		TraesCS1A02G311600	0.303339	-1.721	0.00132896	0.00624386	down
TraesCS1A02G308900	4.54422	2.18403	1.09088e-06	9.13724e-06	up		TraesCS1A02G312900	0.0389425	-4.68251	0.000111174	0.000664751	down
TraesCS1A02G312300	2.00763	1.00549	0.00056158	0.00288699	up		TraesCS1A02G319300	0.354234	-1.49722	0.00160773	0.00738532	down
TraesCS1A02G312400	2.82339	1.49743	2.16983e-07	2.00393e-06	up		TraesCS1A02G321100	0.151585	-2.72181	1.65563e-09	1.95818e-08	down
TraesCS1A02G314500	6.4438	2.68791	1.66229e-48	1.12894e-46	up		TraesCS1A02G323400	0.321941	-1.63513	3.07826e-119	7.83758e-117	down
TraesCS1A02G314800	11.1656	3.48099	2.682e-42	1.54991e-40	up		TraesCS1A02G324000	0.117566	-3.08846	9.59603e-08	9.24684e-07	down
TraesCS1A02G314900	11.788	3.55925	9.13879e-96	1.61661e-93	up		TraesCS1A02G325800	0.215138	-2.21667	1.16259e-10	1.53329e-09	down
TraesCS1A02G329500	28.9484	4.85541	0.00323065	0.0136285	up		TraesCS1A02G331500	0.171654	-2.54242	0.00162672	0.00746131	down
TraesCS1A02G330900	2.14545	1.10128	3.03126e-09	3.49287e-08	up		TraesCS1A02G331600	0.17444	-2.5192	0.000568871	0.00292052	down
TraesCS1A02G331800	5.99743	2.58434	1.23854e-10	1.62746e-09	up		TraesCS1A02G334800	0.38941	-1.36064	1.17048e-12	1.83573e-11	down
TraesCS1A02G334400	7.84468	2.97172	7.33435e-147	2.52152e-144	up		TraesCS1A02G338500	0.318673	-1.64985	1.21294e-06	1.00929e-05	down
TraesCS1A02G337900	11.7119	3.54991	1.23937e-12	1.93976e-11	up		TraesCS1A02G338700	0.220281	-2.18258	3.34028e-24	1.00228e-22	down
TraesCS1A02G339600	2.07904	1.05592	7.47321e-23	2.10342e-21	up		TraesCS1A02G339100	0.0197482	-5.66214	8.75926e-13	1.38807e-11	down
TraesCS1A02G340300	3.68938	1.88338	1.03779e-13	1.76106e-12	up		TraesCS1A02G339200	0.0536632	-4.21992	3.02865e-22	8.30176e-21	down
TraesCS1A02G347000	2.42637	1.2788	3.00801e-05	0.000200706	up		TraesCS1A02G339700	0.0420257	-4.57258	1.79245e-07	1.6719e-06	down
TraesCS1A02G350400	2.8064	1.48872	8.82929e-22	2.37105e-20	up		TraesCS1A02G341200	0.329181	-1.60305	0.000247273	0.00137166	down
TraesCS1A02G351600	40.9779	5.35677	6.09691e-66	6.1732e-64	up		TraesCS1A02G342800	0.0335857	-4.89601	2.03574e-26	6.71794e-25	down
TraesCS1A02G351900	2.65922	1.411	3.66752e-32	1.52965e-30	up		TraesCS1A02G347200	0.343554	-1.54139	7.23065e-11	9.7216e-10	down
TraesCS1A02G352200	4.1533	2.05426	6.1443e-33	2.62565e-31	up		TraesCS1A02G350000	0.0409221	-4.61098	0.00211815	0.00941517	down
TraesCS1A02G356600	5.24746	2.39162	0.0118158	0.0416308	up		TraesCS1A02G350900	0.134213	-2.89741	6.20755e-21	1.60196e-19	down
TraesCS1A02G356900	11.3815	3.50862	2.24682e-92	3.76649e-90	up		TraesCS1A02G352500	0.1725	-2.53533	6.91697e-62	6.41634e-60	down
TraesCS1A02G358100	6.92345	2.79149	8.28132e-06	6.07077e-05	up		TraesCS1A02G354000	0.244792	-2.03037	0.000290774	0.00159049	down
TraesCS1A02G358400	17.4921	4.12864	1.23782e-10	1.62686e-09	up		TraesCS1A02G357900	0.365895	-1.4505	3.12691e-19	7.40096e-18	down
TraesCS1A02G359100	7.28258	2.86445	6.00082e-13	9.6476e-12	up		TraesCS1A02G358700	0.103174	-3.27685	0.0047905	0.019262	down
TraesCS1A02G362100	2.4195	1.27471	8.31588e-42	4.71611e-40	up		TraesCS1A02G371400	0.368718	-1.43941	0.0075254	0.0283218	down
TraesCS1A02G362900	9.14513	3.193	0.00136761	0.00640314	up		TraesCS1A02G372400	0.473661	-1.07807	1.49819e-26	4.98729e-25	down
TraesCS1A02G363800	2.48124	1.31106	1.11381e-44	6.85314e-43	up		TraesCS1A02G381400	0.0834245	-3.58339	1.44729e-07	1.36438e-06	down
TraesCS1A02G364200	2.03523	1.02519	1.34524e-18	3.09257e-17	up		TraesCS1A02G382900	0.118109	-3.08181	1.71863e-14	3.09323e-13	down
TraesCS1A02G365800	13.5146	3.75645	1.6397e-271	2.07873e-268	up		TraesCS1A02G383500	0.315592	-1.66387	2.11247e-08	2.1944e-07	down
TraesCS1A02G367000	2.48703	1.31442	3.4781e-07	3.12444e-06	up		TraesCS1A02G388400	0.358643	-1.47938	5.85105e-58	5.02183e-56	down
TraesCS1A02G367200	2.45232	1.29415	2.21218e-12	3.38655e-11	up		TraesCS1A02G393900	0.326974	-1.61275	4.55568e-05	0.000293699	down
TraesCS1A02G370600	2.12107	1.08479	0.00311242	0.013191	up		TraesCS1A02G395100	0.431484	-1.21262	3.94297e-06	3.03449e-05	down
TraesCS1A02G370700	3.88217	1.95686	5.12211e-29	1.88789e-27	up		TraesCS1A02G395300	0.331195	-1.59425	1.75865e-06	1.42804e-05	down
TraesCS1A02G372200	2.88202	1.52708	0.00660696	0.0253478	up		TraesCS1A02G395800	0.0314403	-4.99124	0.00218404	0.00967482	down
TraesCS1A02G372300	4.58906	2.1982	1.87486e-26	6.20048e-25	up		TraesCS1A02G396800	0.0566281	-4.14234	0.00107378	0.00516413	down
TraesCS1A02G378500	3.85867	1.94811	6.73287e-05	0.000419783	up		TraesCS1A02G400700	0.381458	-1.3904	0.00318724	0.0134706	down
TraesCS1A02G383400	2.68131	1.42294	0.0044061	0.0178931	up		TraesCS1A02G403300	0.126928	-2.97792	6.80582e-224	5.30959e-221	down
TraesCS1A02G383800	3.33934	1.73956	4.95095e-08	4.93731e-07	up		TraesCS1A02G406300	0.496392	-1.01045	2.26944e-06	1.81091e-05	down
TraesCS1A02G384300	23.8271	4.57453	3.30012e-77	4.15774e-75	up		TraesCS1A02G410500	0.186891	-2.41973	3.15567e-10	4.00645e-09	down
TraesCS1A02G391100	5.11755	2.35545	0.000104285	0.000626202	up		TraesCS1A02G410700	0.277726	-1.84826	0.000163905	0.000947826	down
TraesCS1A02G391900	2.57441	1.36424	4.99484e-31	2.00096e-29	up		TraesCS1A02G411200	0.0591757	-4.07885	5.46046e-10	6.78538e-09	down
TraesCS1A02G394400	2.34265	1.22814	1.8165e-31	7.38888e-30	up		TraesCS1A02G411600	0.338092	-1.56451	4.05696e-30	1.57646e-28	down
TraesCS1A02G402100	2.35831	1.23775	1.56788e-24	4.76092e-23	up		TraesCS1A02G414400	0.0184756	-5.75823	1.17207e-05	8.40377e-05	down
TraesCS1A02G402400	5.84574	2.54739	6.44018e-22	1.74409e-20	up		TraesCS1A02G415100	0.394057	-1.34352	3.97489e-09	4.5141e-08	down
TraesCS1A02G404800	9.26153	3.21125	1.38241e-38	7.07504e-37	up		TraesCS1A02G415800	0.323266	-1.62921	3.29551e-06	2.56508e-05	down
TraesCS1A02G404900	118.164	6.88464	8.57447e-11	1.14524e-09	up		TraesCS1A02G418500	0.0137875	-6.18049	8.66597e-06	6.3352e-05	down
TraesCS1A02G405100	28.1584	4.8155	4.95034e-05	0.000317394	up		TraesCS1A02G418700	0.446828	-1.16221	3.46824e-07	3.11696e-06	down
TraesCS1A02G405200	92.62	6.53325	1.50112e-06	1.23108e-05	up		TraesCS1A02G418800	0.303005	-1.72259	2.82036e-152	1.02769e-149	down
TraesCS1A02G405300	10.0414	3.32788	8.46331e-13	1.34362e-11	up		TraesCS1A02G418900	0.0121094	-6.36773	2.50352e-06	1.98442e-05	down
TraesCS1A02G405400	10.4516	3.38565	2.80445e-09	3.2438e-08	up		TraesCS1A02G424100	0.0193804	-5.68925	8.95443e-05	0.000544514	down
TraesCS1A02G405600	25.5272	4.67396	0.00823093	0.030593	up		TraesCS1A02G427400	0.246115	-2.0226	1.97195e-13	3.2903e-12	down
TraesCS1A02G417000	2.2065	1.14176	0.000632148	0.00320936	up		TraesCS1A02G431100	0.144122	-2.79464	0.0116097	0.0410097	down
TraesCS1A02G417700	4.0648	2.02318	4.31564e-15	8.07551e-14	up		TraesCS1A02G431300	0.11426	-3.12961	0.00778593	0.0291491	down
TraesCS1A02G419100	4.32605	2.11305	2.90148e-43	1.71919e-41	up		TraesCS1A02G444400	0.0455296	-4.45705	0.0119577	0.0420557	down
TraesCS1A02G419200	6.93631	2.79417	4.59704e-41	2.54308e-39	up		TraesCS1B02G005300	0.243069	-2.04056	4.16126e-11	5.7109e-10	down
TraesCS1A02G419300	7.56406	2.91916	7.34669e-13	1.1737e-11	up		TraesCS1B02G011500	0.478705	-1.06279	4.82184e-07	4.24629e-06	down
TraesCS1A02G422600	2.50713	1.32604	6.82277e-09	7.51048e-08	up		TraesCS1B02G016800	0.489565	-1.03043	0.00798742	0.0297989	down
TraesCS1A02G426800	2.36894	1.24424	0.00114545	0.00547331	up		TraesCS1B02G021000	0.0195316	-5.67805	0.000109575	0.00065577	down
TraesCS1A02G427300	3.29542	1.72046	7.51138e-11	1.00745e-09	up		TraesCS1B02G031500	0.442722	-1.17553	6.12787e-05	0.000385898	down
TraesCS1A02G437600	6.24509	2.64272	1.09875e-24	3.35818e-23	up		TraesCS1B02G033200	0.109541	-3.19045	0.00752283	0.0283157	down
TraesCS1A02G442300	3.83509	1.93926	0.000156764	0.000909815	up		TraesCS1B02G036400	0.37046	-1.43261	0.00169832	0.00774942	down
TraesCS1B02G004100	5.47867	2.45383	2.74966e-15	5.20118e-14	up		TraesCS1B02G036700	0.110894	-3.17274	0.00777165	0.0291028	down
TraesCS1B02G006600	26.0253	4.70184	0.0060703	0.0236137	up		TraesCS1B02G036800	0.0426932	-4.54985	0.00920541	0.0336408	down
TraesCS1B02G007400	4.05218	2.0187	1.51215e-13	2.53981e-12	up		TraesCS1B02G042200	0.320717	-1.64063	6.75728e-51	4.88934e-49	down
TraesCS1B02G007700	5.24653	2.39136	1.25895e-13	2.12805e-12	up		TraesCS1B02G044400	0.46817	-1.0949	0.0121534	0.0426566	down
TraesCS1B02G012000	2.13463	1.09398	0.00338912	0.0142113	up		TraesCS1B02G055600	0.334575	-1.5796	0.00725908	0.0274861	down
TraesCS1B02G020600	2.20704	1.14212	1.97773e-06	1.5936e-05	up		TraesCS1B02G067600	0.0464475	-4.42826	0.000362562	0.00194487	down
TraesCS1B02G024800	26.9755	4.75358	0.00662262	0.0253954	up		TraesCS1B02G069200	0.31404	-1.67098	0.000561692	0.00288732	down
TraesCS1B02G046000	9.05239	3.1783	0.00752509	0.0283218	up		TraesCS1B02G073900	0.397205	-1.33205	4.45352e-07	3.9419e-06	down
TraesCS1B02G046300	2.44583	1.29032	4.82749e-63	4.61165e-61	up		TraesCS1B02G076400	0.276585	-1.8542	0.00765216	0.0287163	down
TraesCS1B02G048300	4.84054	2.27517	0.00105989	0.00510498	up		TraesCS1B02G083400	0.393819	-1.3444	5.89235e-20	1.45166e-18	down
TraesCS1B02G050600	4.12683	2.04503	1.45362e-22	4.03538e-21	up		TraesCS1B02G086500	0.489724	-1.02996	0.00116878	0.00557167	down
TraesCS1B02G050900	9.1329	3.19107	2.26515e-17	4.83138e-16	up		TraesCS1B02G088500	0.362387	-1.4644	0.000256464	0.00141889	down
TraesCS1B02G051000	17.9257	4.16396	1.64311e-07	1.54158e-06	up		TraesCS1B02G089600	0.0272651	-5.1968	0.000964307	0.00469403	down
TraesCS1B02G056600	7.41109	2.88968	0.00028811	0.00157733	up		TraesCS1B02G090500	0.267939	-1.90002	2.85058e-116	6.91089e-114	down
TraesCS1B02G060400	2.42669	1.27899	0.000906719	0.00444105	up		TraesCS1B02G092000	0.386997	-1.36961	0.000129488	0.000764492	down
TraesCS1B02G062300	3.06458	1.61569	3.08826e-10	3.92413e-09	up		TraesCS1B02G097200	0.268864	-1.89505	5.69015e-100	1.072e-97	down
TraesCS1B02G077000	5.22982	2.38676	8.59134e-09	9.34406e-08	up		TraesCS1B02G097400	0.0342969	-4.86578	7.82673e-135	2.44242e-132	down
TraesCS1B02G077600	6.43133	2.68512	3.52793e-81	4.792e-79	up		TraesCS1B02G098600	0.255492	-1.96865	3.27797e-06	2.55306e-05	down
TraesCS1B02G088900	2.87238	1.52225	9.81474e-124	2.6903e-121	up		TraesCS1B02G100400	0.192306	-2.37852	1.78703e-09	2.10419e-08	down
TraesCS1B02G101500	6.5376	2.70876	0.000945285	0.00460991	up		TraesCS1B02G102700	0.435063	-1.2007	5.97817e-22	1.62114e-20	down
TraesCS1B02G101900	10.4926	3.3913	0.00111352	0.00533585	up		TraesCS1B02G103700	0.432366	-1.20967	0.000796152	0.00394588	down
TraesCS1B02G109400	3.15689	1.6585	0.00118562	0.00564004	up		TraesCS1B02G108100	0.348805	-1.51951	0.00711573	0.027016	down
TraesCS1B02G111200	6.45718	2.6909	3.77313e-20	9.3639e-19	up		TraesCS1B02G113500	0.0382682	-4.70771	7.41522e-05	0.000458428	down
TraesCS1B02G117400	4.74908	2.24765	0	0	up		TraesCS1B02G113700	0.100798	-3.31046	1.96208e-15	3.74988e-14	down
TraesCS1B02G117500	2.79826	1.48453	1.4481e-111	3.22782e-109	up		TraesCS1B02G119600	0.418052	-1.25825	4.55608e-06	3.47601e-05	down
TraesCS1B02G122800	3.34215	1.74078	8.01872e-74	9.62437e-72	up		TraesCS1B02G119700	0.264468	-1.91884	3.78347e-07	3.37902e-06	down
TraesCS1B02G125300	10.5074	3.39334	0.000659358	0.00332863	up		TraesCS1B02G119800	0.208086	-2.26475	3.44836e-19	8.14911e-18	down
TraesCS1B02G128300	2.12057	1.08445	1.54763e-05	0.000108699	up		TraesCS1B02G125800	0.111463	-3.16537	3.33774e-06	2.59497e-05	down
TraesCS1B02G129800	20.0147	4.32299	1.0074e-17	2.20829e-16	up		TraesCS1B02G130200	0.0992451	-3.33286	4.3551e-05	0.000281872	down
TraesCS1B02G130000	33.3457	5.05943	0.000306887	0.00167021	up		TraesCS1B02G132700	0.397447	-1.33116	5.94984e-106	1.2109e-103	down
TraesCS1B02G136700	2.71292	1.43984	1.55074e-69	1.69723e-67	up		TraesCS1B02G134000	0.38099	-1.39218	0.010563	0.0378084	down
TraesCS1B02G136800	4.62959	2.21089	6.10857e-06	4.58177e-05	up		TraesCS1B02G135300	0.216083	-2.21034	0.000139602	0.00081771	down
TraesCS1B02G142000	3.53287	1.82084	0.000466552	0.00244557	up		TraesCS1B02G139200	0.245799	-2.02445	0.000629419	0.00319667	down
TraesCS1B02G146400	2.04369	1.03118	2.11886e-14	3.78225e-13	up		TraesCS1B02G144500	0.262818	-1.92786	2.35431e-31	9.53824e-30	down
TraesCS1B02G158000	8.68829	3.11907	0.0072045	0.02731	up		TraesCS1B02G145300	0.00613153	-7.34954	9.00408e-09	9.77549e-08	down
TraesCS1B02G164200	5.75339	2.52441	0.00114653	0.00547719	up		TraesCS1B02G149600	0.104215	-3.26237	0.00696183	0.0265024	down
TraesCS1B02G192200	4.73291	2.24273	4.61105e-13	7.49644e-12	up		TraesCS1B02G149900	0.403874	-1.30802	1.1088e-15	2.14746e-14	down
TraesCS1B02G194700	2.55656	1.3542	3.17363e-09	3.64449e-08	up		TraesCS1B02G150900	0.379382	-1.39828	0.00226761	0.00998906	down
TraesCS1B02G195800	6.22509	2.6381	2.88176e-83	4.04058e-81	up		TraesCS1B02G159900	0.315333	-1.66505	5.9323e-10	7.33277e-09	down
TraesCS1B02G196600	2.95628	1.56378	6.7219e-15	1.2414e-13	up		TraesCS1B02G162300	0.454718	-1.13696	0.0113286	0.0401649	down
TraesCS1B02G197000	10.7489	3.42611	1.81442e-09	2.13561e-08	up		TraesCS1B02G167200	0.201471	-2.31136	3.23757e-12	4.89351e-11	down
TraesCS1B02G197900	2.60168	1.37944	1.61718e-06	1.32074e-05	up		TraesCS1B02G170200	0.349089	-1.51833	0.00477005	0.0191901	down
TraesCS1B02G198100	2.68767	1.42636	1.02805e-07	9.87355e-07	up		TraesCS1B02G174100	0.0571839	-4.12825	2.66454e-34	1.20195e-32	down
TraesCS1B02G198900	2.18597	1.12828	5.402e-10	6.71547e-09	up		TraesCS1B02G178500	0.49786	-1.00619	0.00790773	0.0295469	down
TraesCS1B02G203200	2.21608	1.14801	0.0130586	0.0453389	up		TraesCS1B02G180100	0.0325735	-4.94016	0.0022568	0.00995005	down
TraesCS1B02G203300	2.77713	1.47359	1.25826e-06	1.04458e-05	up		TraesCS1B02G180300	0.24484	-2.03009	7.93858e-05	0.000488205	down
TraesCS1B02G205800	3.53188	1.82044	2.83192e-19	6.73156e-18	up		TraesCS1B02G181500	0.100254	-3.31827	1.08284e-15	2.09984e-14	down
TraesCS1B02G207700	3.1715	1.66516	5.55642e-55	4.46657e-53	up		TraesCS1B02G184000	0.365045	-1.45385	5.68851e-05	0.000360355	down
TraesCS1B02G208000	3.42812	1.77742	2.82113e-97	5.06406e-95	up		TraesCS1B02G184600	0.0342701	-4.86691	0.00354021	0.0147797	down
TraesCS1B02G208400	71.0333	6.15042	8.60348e-06	6.29254e-05	up		TraesCS1B02G186900	0.234515	-2.09225	0.00287781	0.0123099	down
TraesCS1B02G210400	3.74115	1.90348	1.49406e-78	1.91807e-76	up		TraesCS1B02G187500	0.491526	-1.02466	0.000757345	0.00377259	down
TraesCS1B02G212200	2.32035	1.21434	3.24985e-14	5.72554e-13	up		TraesCS1B02G189400	0.321037	-1.63919	2.12398e-32	8.96937e-31	down
TraesCS1B02G212600	4.11154	2.03968	4.58662e-11	6.27203e-10	up		TraesCS1B02G190000	0.441536	-1.1794	0.00013042	0.000769394	down
TraesCS1B02G213600	2.87955	1.52584	2.07432e-07	1.91951e-06	up		TraesCS1B02G191200	0.411016	-1.28273	1.23701e-54	9.85268e-53	down
TraesCS1B02G214900	3.89385	1.9612	0.00454388	0.0183932	up		TraesCS1B02G194400	0.341328	-1.55077	0.0109089	0.0388612	down
TraesCS1B02G217500	2.44597	1.29041	2.41013e-27	8.27659e-26	up		TraesCS1B02G194600	0.104664	-3.25617	0.00022895	0.00128076	down
TraesCS1B02G223200	21.4943	4.42588	0.0146075	0.0497786	up		TraesCS1B02G194900	0.181103	-2.46512	5.72685e-160	2.26292e-157	down
TraesCS1B02G223300	18.7694	4.23031	0	0	up		TraesCS1B02G197500	0.467066	-1.0983	0.00170036	0.00775638	down
TraesCS1B02G223400	3.48877	1.80272	6.02808e-21	1.55696e-19	up		TraesCS1B02G198400	0.429575	-1.21902	0.000359894	0.00193124	down
TraesCS1B02G224300	2.56722	1.36021	4.18971e-07	3.71921e-06	up		TraesCS1B02G198800	0.475572	-1.07226	2.83356e-05	0.000190171	down
TraesCS1B02G226200	2.03661	1.02617	9.05643e-31	3.60433e-29	up		TraesCS1B02G201100	0.0172057	-5.86097	1.01527e-151	3.67744e-149	down
TraesCS1B02G233400	3.10941	1.63664	0.00114229	0.00546039	up		TraesCS1B02G202400	0.139566	-2.84098	3.54657e-06	2.7468e-05	down
TraesCS1B02G244800	8.50022	3.0875	5.90447e-05	0.000373181	up		TraesCS1B02G207100	0.473138	-1.07967	7.4398e-14	1.27709e-12	down
TraesCS1B02G250900	5.01464	2.32615	4.3074e-128	1.25413e-125	up		TraesCS1B02G220600	0.313114	-1.67524	0.000133015	0.000782578	down
TraesCS1B02G251300	2.12369	1.08657	1.24501e-15	2.4013e-14	up		TraesCS1B02G221100	0.0308606	-5.01809	1.90934e-09	2.24083e-08	down
TraesCS1B02G251700	6.22369	2.63777	1.04778e-19	2.54733e-18	up		TraesCS1B02G227700	0.438415	-1.18963	0.00105719	0.00509362	down
TraesCS1B02G251800	23.4044	4.54871	3.48941e-149	1.21336e-146	up		TraesCS1B02G230300	0.384395	-1.37934	9.04322e-17	1.86732e-15	down
TraesCS1B02G251900	2.52931	1.33875	9.77507e-09	1.05673e-07	up		TraesCS1B02G234700	0.434032	-1.20413	0.00416271	0.0170303	down
TraesCS1B02G258800	5.79701	2.53531	4.34946e-176	1.96054e-173	up		TraesCS1B02G242300	0.460099	-1.11998	6.8537e-09	7.53634e-08	down
TraesCS1B02G258900	2.56017	1.35624	4.44424e-22	1.21328e-20	up		TraesCS1B02G242700	0.251946	-1.98881	1.04997e-09	1.26471e-08	down
TraesCS1B02G262500	14.2899	3.83693	3.91441e-07	3.48806e-06	up		TraesCS1B02G244200	0.434233	-1.20346	0.00164511	0.00753545	down
TraesCS1B02G263200	4.09397	2.0335	2.3274e-06	1.85473e-05	up		TraesCS1B02G244500	0.233895	-2.09607	0.0100862	0.0363303	down
TraesCS1B02G264400	2.24288	1.16535	7.38662e-08	7.21493e-07	up		TraesCS1B02G248600	0.0793049	-3.65645	4.08423e-72	4.68048e-70	down
TraesCS1B02G265900	2.95488	1.5631	1.27707e-53	9.92491e-52	up		TraesCS1B02G249000	0.154465	-2.69465	0.013456	0.0464739	down
TraesCS1B02G267600	4.34065	2.11791	2.16774e-05	0.000148365	up		TraesCS1B02G250600	0.33232	-1.58936	3.69095e-38	1.86701e-36	down
TraesCS1B02G267700	3.06234	1.61463	0.00105136	0.0050667	up		TraesCS1B02G253500	0.468022	-1.09535	9.24696e-69	9.94163e-67	down
TraesCS1B02G269500	2.56614	1.3596	3.49433e-11	4.81952e-10	up		TraesCS1B02G260500	0.070735	-3.82143	7.03481e-06	5.21289e-05	down
TraesCS1B02G269600	4.0029	2.00104	1.6602e-112	3.75563e-110	up		TraesCS1B02G262000	0.338822	-1.5614	2.84791e-95	4.96565e-93	down
TraesCS1B02G269700	2.69365	1.42956	3.42417e-15	6.44302e-14	up		TraesCS1B02G265200	0.446438	-1.16347	0.0097482	0.0352905	down
TraesCS1B02G269800	2.81483	1.49305	5.57957e-44	3.36499e-42	up		TraesCS1B02G280000	0.38087	-1.39263	6.73702e-06	5.01604e-05	down
TraesCS1B02G275000	2.52731	1.3376	1.40514e-11	2.00906e-10	up		TraesCS1B02G283100	0.0135372	-6.20693	1.06788e-08	1.14953e-07	down
TraesCS1B02G275300	11.3008	3.49836	1.18279e-05	8.47363e-05	up		TraesCS1B02G287100	0.479983	-1.05894	5.14421e-07	4.5119e-06	down
TraesCS1B02G275400	2.13635	1.09515	1.23273e-09	1.47753e-08	up		TraesCS1B02G288200	0.360804	-1.47071	0.00347609	0.014538	down
TraesCS1B02G275600	2.19825	1.13636	3.78315e-23	1.08386e-21	up		TraesCS1B02G288600	0.44169	-1.1789	3.07787e-11	4.26348e-10	down
TraesCS1B02G279000	2.55607	1.35393	1.50373e-08	1.59056e-07	up		TraesCS1B02G289900	0.0432155	-4.53231	0.00940155	0.0342228	down
TraesCS1B02G279400	6.53878	2.70902	1.27465e-05	9.07405e-05	up		TraesCS1B02G290500	0.478599	-1.06311	1.05818e-33	4.6763e-32	down
TraesCS1B02G281000	2.77133	1.47058	1.10088e-59	9.83708e-58	up		TraesCS1B02G293400	0.22489	-2.15271	0.00903611	0.0331125	down
TraesCS1B02G282600	5.65373	2.4992	0.00683987	0.0261002	up		TraesCS1B02G294300	0.411523	-1.28095	0.000241717	0.00134415	down
TraesCS1B02G286300	9.01395	3.17216	1.69123e-91	2.78902e-89	up		TraesCS1B02G296600	0.102702	-3.28346	5.85407e-105	1.17958e-102	down
TraesCS1B02G287500	3.43815	1.78163	8.51859e-21	2.18263e-19	up		TraesCS1B02G305800	0.0210886	-5.56739	0.000191731	0.00109225	down
TraesCS1B02G287800	4.01694	2.0061	4.15034e-79	5.385e-77	up		TraesCS1B02G306400	0.175003	-2.51455	9.97529e-05	0.000601304	down
TraesCS1B02G289300	2.194	1.13356	4.98247e-16	9.83435e-15	up		TraesCS1B02G306500	0.171839	-2.54087	9.31027e-56	7.59448e-54	down
TraesCS1B02G291500	9.48228	3.24523	7.08893e-18	1.56693e-16	up		TraesCS1B02G308200	0.252827	-1.98378	6.171e-47	4.00766e-45	down
TraesCS1B02G291700	4.1742	2.0615	0.000236102	0.00131641	up		TraesCS1B02G310200	0.117934	-3.08395	3.51038e-05	0.000231234	down
TraesCS1B02G292200	2.96521	1.56813	2.09722e-17	4.48418e-16	up		TraesCS1B02G318800	0.460011	-1.12026	6.76512e-08	6.63772e-07	down
TraesCS1B02G293700	2.39689	1.26116	6.6319e-10	8.15281e-09	up		TraesCS1B02G319200	0.433169	-1.207	1.89761e-11	2.67424e-10	down
TraesCS1B02G299200	2.04586	1.03271	0.0022528	0.00993746	up		TraesCS1B02G320700	0.466422	-1.10029	0.000453599	0.00238445	down
TraesCS1B02G301200	4.98213	2.31676	0.000199508	0.00113177	up		TraesCS1B02G322800	0.45383	-1.13978	0.00124735	0.00590383	down
TraesCS1B02G305200	2.22802	1.15576	1.0401e-20	2.65488e-19	up		TraesCS1B02G323000	0.125298	-2.99657	0.000113871	0.000679206	down
TraesCS1B02G310700	3.8764	1.95472	0.000113166	0.000675667	up		TraesCS1B02G323100	0.079747	-3.64843	4.41771e-60	3.97672e-58	down
TraesCS1B02G312800	3.63366	1.86142	5.61512e-110	1.2247e-107	up		TraesCS1B02G323600	0.403327	-1.30998	0.00962866	0.034932	down
TraesCS1B02G313400	9.71022	3.2795	8.36157e-05	0.000511992	up		TraesCS1B02G324500	0.440551	-1.18262	0.00933276	0.0340271	down
TraesCS1B02G314700	2.51737	1.33192	8.95055e-52	6.62602e-50	up		TraesCS1B02G326200	0.467204	-1.09787	0.000220255	0.00123735	down
TraesCS1B02G316500	2.3581	1.23762	2.65016e-18	5.9973e-17	up		TraesCS1B02G331300	0.164072	-2.6076	9.55504e-07	8.06105e-06	down
TraesCS1B02G323800	2.83459	1.50314	0.00341668	0.01432	up		TraesCS1B02G335300	0.235527	-2.08603	0.00832381	0.0308722	down
TraesCS1B02G325200	2.02958	1.02118	0.00160819	0.00738688	up		TraesCS1B02G337400	0.0515949	-4.27663	7.15887e-18	1.58181e-16	down
TraesCS1B02G326800	5.55975	2.47502	2.54658e-179	1.23972e-176	up		TraesCS1B02G337500	0.382566	-1.38622	0.00041466	0.00219722	down
TraesCS1B02G326900	7.20882	2.84976	4.36545e-126	1.23556e-123	up		TraesCS1B02G337600	0.469381	-1.09117	0.00239621	0.010491	down
TraesCS1B02G328200	14.9717	3.90417	2.70988e-05	0.000182575	up		TraesCS1B02G345200	0.113714	-3.13652	0.000588261	0.00300738	down
TraesCS1B02G344900	3.0047	1.58722	7.04598e-17	1.46235e-15	up		TraesCS1B02G345900	0.23515	-2.08835	9.67209e-07	8.15528e-06	down
TraesCS1B02G345400	11.2431	3.49096	1.70934e-06	1.39004e-05	up		TraesCS1B02G351400	0.0510543	-4.29182	0.000485614	0.00253392	down
TraesCS1B02G346700	2.1658	1.1149	7.33817e-15	1.35275e-13	up		TraesCS1B02G351500	0.167184	-2.58049	8.05486e-09	8.78413e-08	down
TraesCS1B02G347400	5.28764	2.40262	0.000221181	0.00124186	up		TraesCS1B02G352000	0.435472	-1.19935	0.0014534	0.00675905	down
TraesCS1B02G347600	20.07	4.32697	6.32313e-220	4.87057e-217	up		TraesCS1B02G355900	0.0399173	-4.64684	7.28237e-23	2.05256e-21	down
TraesCS1B02G349100	51.9306	5.69851	4.01971e-10	5.04969e-09	up		TraesCS1B02G363100	0.494213	-1.0168	8.77706e-19	2.04011e-17	down
TraesCS1B02G350300	47.6199	5.57349	8.52157e-58	7.26267e-56	up		TraesCS1B02G364200	0.200516	-2.31821	2.66715e-05	0.000179915	down
TraesCS1B02G356600	2.39567	1.26043	1.41993e-06	1.16843e-05	up		TraesCS1B02G365100	0.0963583	-3.37545	2.47522e-38	1.26043e-36	down
TraesCS1B02G357000	3.40596	1.76806	3.81369e-75	4.64141e-73	up		TraesCS1B02G365200	0.168145	-2.57222	2.60929e-08	2.6812e-07	down
TraesCS1B02G361200	8.80871	3.13893	8.11851e-18	1.78866e-16	up		TraesCS1B02G369400	0.159474	-2.6486	5.01968e-106	1.02848e-103	down
TraesCS1B02G364100	5.60539	2.48682	0.00027507	0.00151275	up		TraesCS1B02G376900	0.354299	-1.49696	1.26028e-06	1.04611e-05	down
TraesCS1B02G370900	40.0931	5.32528	3.2431e-187	1.74645e-184	up		TraesCS1B02G378000	0.398908	-1.32587	0.000709513	0.00355791	down
TraesCS1B02G371300	2.85684	1.51442	5.72752e-44	3.4508e-42	up		TraesCS1B02G382200	0.244304	-2.03325	0.000466778	0.00244647	down
TraesCS1B02G371900	72.5551	6.18101	2.74635e-19	6.53837e-18	up		TraesCS1B02G386600	0.411758	-1.28013	0.00606865	0.0236103	down
TraesCS1B02G373000	16.603	4.05337	0.0106818	0.0381796	up		TraesCS1B02G391900	0.0608993	-4.03743	6.7894e-06	5.05072e-05	down
TraesCS1B02G373100	35.7618	5.16035	1.83908e-211	1.25744e-208	up		TraesCS1B02G392400	0.165965	-2.59105	9.23766e-74	1.10655e-71	down
TraesCS1B02G374700	11.1801	3.48286	0.0123171	0.0431353	up		TraesCS1B02G393900	0.305754	-1.70956	5.08557e-08	5.06327e-07	down
TraesCS1B02G375400	13.2582	3.72881	4.04045e-29	1.49647e-27	up		TraesCS1B02G398800	0.465403	-1.10345	1.83006e-05	0.000126794	down
TraesCS1B02G380100	3.67822	1.87901	0.000641867	0.0032522	up		TraesCS1B02G403900	0.126198	-2.98624	4.57813e-07	4.04355e-06	down
TraesCS1B02G381000	3.76615	1.91309	1.75969e-153	6.56937e-151	up		TraesCS1B02G409800	0.377406	-1.40581	0.00646551	0.0248949	down
TraesCS1B02G381600	2.25164	1.17098	1.51273e-19	3.65144e-18	up		TraesCS1B02G415800	0.397214	-1.33201	4.72755e-58	4.06904e-56	down
TraesCS1B02G384900	4.43436	2.14872	4.99622e-12	7.42624e-11	up		TraesCS1B02G423600	0.428407	-1.22294	8.87739e-05	0.000540207	down
TraesCS1B02G389200	3.23264	1.69271	5.36947e-23	1.52755e-21	up		TraesCS1B02G425000	0.0084973	-6.87878	3.59931e-08	3.64677e-07	down
TraesCS1B02G389700	8.17704	3.03158	7.86732e-30	3.01855e-28	up		TraesCS1B02G429900	0.293286	-1.76962	0.0131222	0.04552	down
TraesCS1B02G389900	4.93942	2.30434	1.65675e-24	5.02827e-23	up		TraesCS1B02G432700	0.158646	-2.65611	1.11606e-200	6.72423e-198	down
TraesCS1B02G392300	2.49123	1.31686	3.9211e-05	0.000256126	up		TraesCS1B02G432900	0.396966	-1.33291	0.00174535	0.00793899	down
TraesCS1B02G394900	23.8885	4.57825	0.00781043	0.02923	up		TraesCS1B02G436500	0.15929	-2.65028	1.39301e-27	4.86052e-26	down
TraesCS1B02G398400	18.5127	4.21044	0.00610924	0.023747	up		TraesCS1B02G437100	0.259351	-1.94702	6.30285e-07	5.46044e-06	down
TraesCS1B02G399300	4.73996	2.24488	2.748e-09	3.18214e-08	up		TraesCS1B02G439200	0.15849	-2.65753	3.31812e-05	0.00021952	down
TraesCS1B02G401700	3.13122	1.64672	4.10232e-05	0.000266903	up		TraesCS1B02G440300	0.0928395	-3.42912	1.03248e-07	9.91145e-07	down
TraesCS1B02G410000	2.31043	1.20816	0.0107805	0.038476	up		TraesCS1B02G441900	0.308267	-1.69775	1.70752e-88	2.67799e-86	down
TraesCS1B02G410300	8.98486	3.1675	3.35029e-76	4.12696e-74	up		TraesCS1B02G447000	0.371111	-1.43008	6.75794e-09	7.44315e-08	down
TraesCS1B02G410400	4.21006	2.07384	0.000304706	0.00166013	up		TraesCS1B02G455700	0.493372	-1.01925	0.00993321	0.0358685	down
TraesCS1B02G411100	53.5235	5.7421	2.76634e-307	4.42993e-304	up		TraesCS1B02G455800	0.19676	-2.34549	0.000727067	0.00363784	down
TraesCS1B02G411900	2.52739	1.33765	0.00132923	0.00624458	up		TraesCS1B02G457600	0.361405	-1.46831	0.00299952	0.012757	down
TraesCS1B02G419300	16.2706	4.02419	7.25862e-12	1.06306e-10	up		TraesCS1B02G462300	0.252199	-1.98736	0.00670612	0.0256751	down
TraesCS1B02G419800	2.62943	1.39475	3.83189e-22	1.04846e-20	up		TraesCS1B02G464900	0.48571	-1.04183	2.72616e-07	2.48639e-06	down
TraesCS1B02G419900	2.60838	1.38315	7.61212e-07	6.52412e-06	up		TraesCS1B02G479000	0.0114791	-6.44484	1.94869e-06	1.57228e-05	down
TraesCS1B02G420000	8.54343	3.09482	8.64431e-148	2.98877e-145	up		TraesCS1D02G007800	0.466621	-1.09968	9.27677e-06	6.75898e-05	down
TraesCS1B02G431400	22.2087	4.47305	0	0	up		TraesCS1D02G009192	0.301083	-1.73177	0.00722395	0.0273701	down
TraesCS1B02G432000	2.99048	1.58038	0.000448009	0.00235873	up		TraesCS1D02G013700	0.0125492	-6.31626	4.12562e-06	3.16945e-05	down
TraesCS1B02G434400	2.16451	1.11404	2.56546e-12	3.90968e-11	up		TraesCS1D02G013800	0.0291404	-5.10084	0.00117435	0.0055943	down
TraesCS1B02G434600	7.30876	2.86963	8.72107e-45	5.38776e-43	up		TraesCS1D02G018100	0.159726	-2.64633	0.00426706	0.0174081	down
TraesCS1B02G434700	133.255	7.05805	5.85152e-08	5.77672e-07	up		TraesCS1D02G020800	0.0157173	-5.9915	4.36171e-08	4.3784e-07	down
TraesCS1B02G434800	59.4307	5.89314	4.1104e-05	0.000267286	up		TraesCS1D02G021600	0.0941918	-3.40825	1.5146e-09	1.79872e-08	down
TraesCS1B02G435100	85.2119	6.41298	2.9392e-06	2.30425e-05	up		TraesCS1D02G021700	0.0342235	-4.86887	0.0031044	0.0131598	down
TraesCS1B02G435200	23.8627	4.57669	6.11081e-05	0.000385022	up		TraesCS1D02G023300	0.149489	-2.74188	0.00385724	0.0159457	down
TraesCS1B02G435300	9.89371	3.30651	4.56368e-27	1.54971e-25	up		TraesCS1D02G029300	0.0202151	-5.62842	0.000167221	0.000964799	down
TraesCS1B02G435400	6.36058	2.66916	5.28426e-18	1.177e-16	up		TraesCS1D02G029400	0.308751	-1.69548	1.79074e-05	0.000124239	down
TraesCS1B02G435500	11.4007	3.51105	5.60354e-05	0.00035538	up		TraesCS1D02G030000	0.210362	-2.24906	2.64712e-05	0.000178663	down
TraesCS1B02G447400	2.83666	1.5042	0.00200615	0.00897964	up		TraesCS1D02G030500	0.396228	-1.3356	8.07833e-42	4.58566e-40	down
TraesCS1B02G447800	2.28778	1.19395	1.14999e-07	1.09857e-06	up		TraesCS1D02G032400	0.0421815	-4.56725	0.00849917	0.0314269	down
TraesCS1B02G449200	3.62072	1.85627	9.22428e-26	2.94654e-24	up		TraesCS1D02G034300	0.0455296	-4.45705	0.0119577	0.0420557	down
TraesCS1B02G449300	4.25205	2.08816	2.01901e-20	5.079e-19	up		TraesCS1D02G036300	0.391574	-1.35264	0.00233883	0.0102664	down
TraesCS1B02G449400	4.83608	2.27384	1.9699e-16	3.98379e-15	up		TraesCS1D02G043000	0.376109	-1.41078	1.22714e-05	8.76764e-05	down
TraesCS1B02G454000	6.50275	2.70105	0.000159768	0.000925745	up		TraesCS1D02G047900	0.469567	-1.0906	4.51103e-29	1.6667e-27	down
TraesCS1B02G454100	22.2923	4.47847	0.000252295	0.00139773	up		TraesCS1D02G053800	0.208236	-2.26371	2.98596e-05	0.000199344	down
TraesCS1B02G454400	6.09211	2.60694	8.20119e-14	1.40382e-12	up		TraesCS1D02G054200	0.326646	-1.6142	0.00050794	0.00264045	down
TraesCS1B02G454800	2.89364	1.53288	0.00152205	0.00703903	up		TraesCS1D02G063000	0.434782	-1.20163	5.77142e-13	9.29352e-12	down
TraesCS1B02G455100	3.04774	1.60774	1.04095e-09	1.25484e-08	up		TraesCS1D02G066000	0.356161	-1.4894	3.55288e-21	9.26703e-20	down
TraesCS1B02G456200	18.666	4.22234	0.00571868	0.0224237	up		TraesCS1D02G067700	0.448165	-1.1579	0.00131662	0.00619495	down
TraesCS1B02G460700	2.22211	1.15193	0.00558577	0.021989	up		TraesCS1D02G069800	0.389039	-1.36201	0.0118155	0.0416308	down
TraesCS1B02G471400	2.56889	1.36115	2.32634e-07	2.14099e-06	up		TraesCS1D02G074500	0.404443	-1.30599	1.54614e-53	1.19854e-51	down
TraesCS1B02G472200	8.48234	3.08446	9.99404e-52	7.38952e-50	up		TraesCS1D02G075700	0.00620549	-7.33224	8.54559e-09	9.29763e-08	down
TraesCS1B02G472800	2.40968	1.26884	0.000297612	0.00162453	up		TraesCS1D02G076200	0.317396	-1.65565	1.0152e-30	4.03242e-29	down
TraesCS1B02G478700	2.23582	1.1608	3.5771e-31	1.43869e-29	up		TraesCS1D02G077400	0.44964	-1.15316	4.5485e-14	7.924e-13	down
TraesCS1D02G001700	2.80625	1.48864	2.49006e-13	4.12689e-12	up		TraesCS1D02G078900	0.0784712	-3.67169	0	0	down
TraesCS1D02G001800	2.58902	1.37241	1.85347e-06	1.50103e-05	up		TraesCS1D02G079100	0.431268	-1.21334	1.57204e-11	2.23508e-10	down
TraesCS1D02G002200	2.20477	1.14063	0.000770494	0.00383119	up		TraesCS1D02G081100	0.402198	-1.31402	0.00634451	0.0244956	down
TraesCS1D02G004600	3.64652	1.86652	3.83516e-08	3.87577e-07	up		TraesCS1D02G081200	0.167153	-2.58076	7.18422e-239	6.62385e-236	down
TraesCS1D02G005100	6.80485	2.76656	2.02062e-37	1.00048e-35	up		TraesCS1D02G084100	0.40051	-1.32009	9.59579e-05	0.000580267	down
TraesCS1D02G009300	5.79307	2.53433	4.77216e-34	2.13056e-32	up		TraesCS1D02G084200	0.0673377	-3.89244	2.3469e-05	0.000159908	down
TraesCS1D02G018700	19.9282	4.31674	8.36672e-19	1.94697e-17	up		TraesCS1D02G086700	0.292776	-1.77213	9.0215e-56	7.37872e-54	down
TraesCS1D02G020500	13.6909	3.77514	6.4918e-07	5.61374e-06	up		TraesCS1D02G086800	0.108958	-3.19816	0.000520781	0.00269822	down
TraesCS1D02G022900	3.8897	1.95966	4.18506e-19	9.8518e-18	up		TraesCS1D02G092900	0.387381	-1.36818	1.64762e-06	1.3438e-05	down
TraesCS1D02G037700	2.15973	1.11085	5.6941e-45	3.5393e-43	up		TraesCS1D02G094700	0.125407	-2.99531	8.57387e-130	2.53271e-127	down
TraesCS1D02G039300	23.9108	4.57959	2.30922e-42	1.33575e-40	up		TraesCS1D02G094900	0.060755	-4.04085	4.07033e-61	3.71346e-59	down
TraesCS1D02G042100	2.84327	1.50755	0.00399298	0.01643	up		TraesCS1D02G095400	0.346129	-1.53062	4.73926e-13	7.6905e-12	down
TraesCS1D02G047200	2.97842	1.57455	0.000337775	0.00182396	up		TraesCS1D02G097000	0.0213767	-5.54782	0.000164687	0.000951353	down
TraesCS1D02G047300	17.4233	4.12294	3.8414e-28	1.3694e-26	up		TraesCS1D02G100300	0.0807426	-3.63053	0.00614591	0.0238636	down
TraesCS1D02G048900	6.2096	2.6345	0.00219701	0.00972169	up		TraesCS1D02G102300	0.35172	-1.5075	0.00757287	0.0284617	down
TraesCS1D02G049000	5.4425	2.44427	2.56901e-13	4.25386e-12	up		TraesCS1D02G105200	0.359758	-1.4749	0.00109822	0.00527081	down
TraesCS1D02G049100	5.17543	2.37168	1.24966e-23	3.66126e-22	up		TraesCS1D02G105400	0.0620147	-4.01124	0.00228927	0.0100728	down
TraesCS1D02G060600	8.48819	3.08546	1.26493e-50	9.08779e-49	up		TraesCS1D02G106700	0.269233	-1.89307	8.35348e-13	1.32722e-11	down
TraesCS1D02G064500	3.02062	1.59484	9.73581e-42	5.50087e-40	up		TraesCS1D02G108100	0.275886	-1.85786	0.00438212	0.0178106	down
TraesCS1D02G066700	2.52944	1.33882	7.49002e-48	4.98123e-46	up		TraesCS1D02G111000	0.311586	-1.6823	0.00882655	0.032452	down
TraesCS1D02G072900	2.7319	1.4499	1.88249e-116	4.58213e-114	up		TraesCS1D02G114100	0.3759	-1.41158	1.0632e-123	2.90126e-121	down
TraesCS1D02G082500	3.15458	1.65745	1.13973e-14	2.07525e-13	up		TraesCS1D02G116800	0.0741455	-3.7535	6.20395e-06	4.64643e-05	down
TraesCS1D02G082600	2.52821	1.33812	6.97201e-110	1.50982e-107	up		TraesCS1D02G117100	0.457361	-1.12859	3.04109e-05	0.000202646	down
TraesCS1D02G090000	4.67421	2.22472	0.000560154	0.00288039	up		TraesCS1D02G117400	0.249095	-2.00523	4.97938e-13	8.06723e-12	down
TraesCS1D02G090800	3.2396	1.69582	9.57187e-46	6.02345e-44	up		TraesCS1D02G118500	0.3674	-1.44458	3.23605e-05	0.000214533	down
TraesCS1D02G091600	3.4841	1.80079	0.00119586	0.00568654	up		TraesCS1D02G119900	0.120195	-3.05655	0.000158264	0.000917905	down
TraesCS1D02G092400	4.16268	2.05751	0.00687678	0.0262197	up		TraesCS1D02G120500	0.223906	-2.15904	0.000492695	0.00256801	down
TraesCS1D02G096400	4.19293	2.06796	0.00076793	0.00381915	up		TraesCS1D02G120700	0.119799	-3.06131	9.41732e-05	0.000570252	down
TraesCS1D02G098000	6.14791	2.6201	0	0	up		TraesCS1D02G122600	0.323174	-1.62962	6.92928e-114	1.60939e-111	down
TraesCS1D02G098100	3.51474	1.81342	4.92477e-168	2.09568e-165	up		TraesCS1D02G127000	0.233885	-2.09613	0.0140785	0.048265	down
TraesCS1D02G101900	2.27358	1.18497	0.00144669	0.00673042	up		TraesCS1D02G127800	0.221937	-2.17178	9.23216e-08	8.91739e-07	down
TraesCS1D02G106800	21.3956	4.41924	0.000276168	0.00151837	up		TraesCS1D02G128000	0.279404	-1.83957	9.82205e-51	7.08165e-49	down
TraesCS1D02G107000	2.00093	1.00067	5.66994e-66	5.76005e-64	up		TraesCS1D02G128400	0.306666	-1.70526	5.00586e-06	3.79585e-05	down
TraesCS1D02G111400	11.1513	3.47913	1.58638e-11	2.25389e-10	up		TraesCS1D02G137900	0.0838069	-3.57679	0.00017334	0.000997078	down
TraesCS1D02G117900	3.07624	1.62117	2.72584e-113	6.23583e-111	up		TraesCS1D02G142100	0.296365	-1.75455	2.50795e-13	4.15502e-12	down
TraesCS1D02G118800	12.5487	3.64946	5.02792e-16	9.91764e-15	up		TraesCS1D02G144400	0.333399	-1.58468	1.53745e-36	7.38412e-35	down
TraesCS1D02G122500	2.13474	1.09406	1.29697e-18	2.98537e-17	up		TraesCS1D02G145400	0.192255	-2.37891	0.00129523	0.0061061	down
TraesCS1D02G126300	2.07169	1.05081	6.44158e-08	6.33355e-07	up		TraesCS1D02G146600	0.169183	-2.56334	8.93004e-10	1.08465e-08	down
TraesCS1D02G139400	2.09843	1.06931	1.53088e-29	5.79694e-28	up		TraesCS1D02G147900	0.115105	-3.11898	1.57135e-09	1.86429e-08	down
TraesCS1D02G139600	4.74922	2.24769	0.0125982	0.0440183	up		TraesCS1D02G149800	0.0647661	-3.94862	9.63098e-48	6.36335e-46	down
TraesCS1D02G142700	2.01807	1.01298	1.12496e-06	9.40205e-06	up		TraesCS1D02G151900	0.364133	-1.45746	0.00490572	0.0196552	down
TraesCS1D02G144600	8.43359	3.07615	0.000121231	0.000719859	up		TraesCS1D02G152200	0.439246	-1.1869	0.00478891	0.0192569	down
TraesCS1D02G145800	2.65607	1.40929	6.31123e-05	0.000396256	up		TraesCS1D02G155400	0.0194203	-5.68629	3.99479e-06	3.07244e-05	down
TraesCS1D02G157400	2.66377	1.41347	3.13331e-06	2.44728e-05	up		TraesCS1D02G155800	0.436408	-1.19625	1.10735e-06	9.26372e-06	down
TraesCS1D02G158100	26.6639	4.73682	7.43993e-05	0.000459816	up		TraesCS1D02G160200	0.485941	-1.04115	8.55031e-06	6.2559e-05	down
TraesCS1D02G162400	13.1927	3.72167	2.33186e-08	2.41159e-07	up		TraesCS1D02G161900	0.352806	-1.50305	3.05659e-05	0.000203567	down
TraesCS1D02G164700	11.6359	3.54052	0.0141555	0.0484744	up		TraesCS1D02G163900	0.241843	-2.04786	3.98414e-33	1.7219e-31	down
TraesCS1D02G167700	2.95895	1.56509	0.0103151	0.0370497	up		TraesCS1D02G164100	0.413855	-1.2728	3.16379e-07	2.85854e-06	down
TraesCS1D02G174000	2.05223	1.0372	5.90069e-12	8.70681e-11	up		TraesCS1D02G165000	0.459711	-1.1212	2.33406e-13	3.87642e-12	down
TraesCS1D02G175400	4.04648	2.01667	2.28785e-14	4.07434e-13	up		TraesCS1D02G167400	0.155889	-2.68141	5.57705e-05	0.00035381	down
TraesCS1D02G177900	2.73382	1.45092	7.77999e-40	4.15652e-38	up		TraesCS1D02G172700	0.0408085	-4.61499	0.00158004	0.00727241	down
TraesCS1D02G185900	2.18814	1.12971	0.000118211	0.000703443	up		TraesCS1D02G176400	0.360018	-1.47386	8.21861e-06	6.02698e-05	down
TraesCS1D02G186500	3.09557	1.6302	0.00346466	0.0144951	up		TraesCS1D02G177700	0.0212197	-5.55845	1.64246e-117	4.09619e-115	down
TraesCS1D02G187100	4.36332	2.12543	0.0023801	0.0104257	up		TraesCS1D02G178200	0.26973	-1.89041	7.22876e-08	7.07097e-07	down
TraesCS1D02G187500	10.3022	3.36489	2.34931e-44	1.42532e-42	up		TraesCS1D02G180300	0.0563352	-4.14982	0.00786339	0.0294065	down
TraesCS1D02G188500	5.40281	2.43371	2.51934e-68	2.67551e-66	up		TraesCS1D02G185300	0.38985	-1.35901	1.20826e-06	1.00609e-05	down
TraesCS1D02G189700	2.04679	1.03336	0.000727169	0.00363805	up		TraesCS1D02G185700	0.487468	-1.03662	0.00344399	0.0144185	down
TraesCS1D02G190700	2.00952	1.00685	0.0092962	0.0339124	up		TraesCS1D02G189400	0.292095	-1.77549	0.000573362	0.00294085	down
TraesCS1D02G194200	5.8501	2.54846	1.25491e-08	1.34042e-07	up		TraesCS1D02G189800	0.327619	-1.60991	1.48579e-34	6.73217e-33	down
TraesCS1D02G196900	3.35676	1.74707	2.37066e-86	3.53577e-84	up		TraesCS1D02G190100	0.300664	-1.73378	4.99146e-75	6.06269e-73	down
TraesCS1D02G199000	2.14998	1.10432	8.07131e-38	4.03247e-36	up		TraesCS1D02G190200	0.0342489	-4.8678	9.31314e-32	3.82147e-30	down
TraesCS1D02G201100	2.72291	1.44515	2.0502e-43	1.21954e-41	up		TraesCS1D02G190500	0.0321605	-4.95857	0.00224891	0.00992157	down
TraesCS1D02G202300	2.46651	1.30247	0.0102097	0.0367252	up		TraesCS1D02G192300	0.321138	-1.63873	0.0039915	0.016426	down
TraesCS1D02G205700	2.7041	1.43515	2.86889e-81	3.9143e-79	up		TraesCS1D02G194100	0.404047	-1.30741	0.00481506	0.0193442	down
TraesCS1D02G206700	2.36655	1.24279	0.00288201	0.0123253	up		TraesCS1D02G194300	0.445453	-1.16665	0.00997969	0.0360085	down
TraesCS1D02G206900	2.1966	1.13527	1.0883e-21	2.89952e-20	up		TraesCS1D02G195700	0.499894	-1.00031	7.18634e-13	1.14929e-11	down
TraesCS1D02G210900	3.90245	1.96438	1.67311e-05	0.000116677	up		TraesCS1D02G196000	0.104961	-3.25208	0.0012446	0.00589342	down
TraesCS1D02G212400	7.62888	2.93147	5.75428e-258	6.48444e-255	up		TraesCS1D02G205300	0.330722	-1.59631	2.50163e-11	3.48909e-10	down
TraesCS1D02G213700	2.74749	1.45811	2.42574e-09	2.82293e-08	up		TraesCS1D02G207100	0.051451	-4.28066	2.01141e-06	1.61881e-05	down
TraesCS1D02G214700	2.57862	1.3666	1.37408e-14	2.48708e-13	up		TraesCS1D02G210100	0.443203	-1.17396	3.81393e-05	0.000249688	down
TraesCS1D02G218800	37.2015	5.21729	7.58358e-06	5.5862e-05	up		TraesCS1D02G215500	0.0069853	-7.16146	3.32827e-08	3.38683e-07	down
TraesCS1D02G224100	17.0114	4.08843	0.00914081	0.0334398	up		TraesCS1D02G216500	0.261244	-1.93653	2.86978e-09	3.31684e-08	down
TraesCS1D02G227500	2.76875	1.46923	0.0141274	0.0484001	up		TraesCS1D02G217400	0.151707	-2.72064	0.0135414	0.0467132	down
TraesCS1D02G231600	3.35731	1.74731	6.1877e-114	1.44266e-111	up		TraesCS1D02G229700	0.275013	-1.86243	1.31461e-07	1.24606e-06	down
TraesCS1D02G233800	6.766	2.7583	0.000211001	0.00119031	up		TraesCS1D02G230300	0.0277769	-5.16997	7.113e-06	5.26698e-05	down
TraesCS1D02G236200	7.92654	2.98669	2.34827e-53	1.79744e-51	up		TraesCS1D02G232700	0.0505781	-4.30534	4.00938e-50	2.84358e-48	down
TraesCS1D02G239000	2.94946	1.56045	5.60653e-24	1.66505e-22	up		TraesCS1D02G234100	0.475558	-1.07231	0.00954573	0.0346647	down
TraesCS1D02G239700	6.19011	2.62997	3.16253e-11	4.37677e-10	up		TraesCS1D02G236600	0.496615	-1.0098	6.5887e-05	0.000411807	down
TraesCS1D02G239800	5.31017	2.40876	9.52729e-37	4.60123e-35	up		TraesCS1D02G237100	0.157942	-2.66254	1.89105e-62	1.77584e-60	down
TraesCS1D02G239900	2.06547	1.04647	1.74024e-08	1.82487e-07	up		TraesCS1D02G238900	0.299173	-1.74095	7.16778e-40	3.83618e-38	down
TraesCS1D02G247700	9.20817	3.20291	3.94042e-201	2.44676e-198	up		TraesCS1D02G245100	0.292793	-1.77205	0.0126177	0.0440663	down
TraesCS1D02G248500	4.53424	2.18086	1.18031e-12	1.85018e-11	up		TraesCS1D02G251300	0.0758915	-3.71992	0.00571851	0.0224237	down
TraesCS1D02G254500	2.00609	1.00439	9.93126e-43	5.82213e-41	up		TraesCS1D02G252500	0.412583	-1.27725	5.52177e-06	4.16318e-05	down
TraesCS1D02G256400	3.89181	1.96044	1.12667e-12	1.77021e-11	up		TraesCS1D02G256700	0.0290291	-5.10636	0.000244229	0.00135687	down
TraesCS1D02G256800	9.10644	3.18689	1.46209e-38	7.4703e-37	up		TraesCS1D02G258800	0.23964	-2.06106	2.66777e-05	0.000179917	down
TraesCS1D02G259000	3.80841	1.92919	1.80527e-81	2.47978e-79	up		TraesCS1D02G259700	0.463626	-1.10897	0.00067183	0.00338597	down
TraesCS1D02G259100	3.6001	1.84804	5.13938e-30	1.98938e-28	up		TraesCS1D02G261200	0.271012	-1.88357	3.93853e-09	4.47558e-08	down
TraesCS1D02G262300	2.24029	1.16369	2.22947e-96	3.95974e-94	up		TraesCS1D02G261800	0.499785	-1.00062	0.0097774	0.0353835	down
TraesCS1D02G268900	3.34238	1.74088	1.56096e-21	4.13169e-20	up		TraesCS1D02G263800	0.49975	-1.00072	6.51548e-23	1.84495e-21	down
TraesCS1D02G269400	4.31655	2.10988	0.000315861	0.001714	up		TraesCS1D02G267800	0.364581	-1.45569	6.93856e-28	2.45195e-26	down
TraesCS1D02G269600	4.718	2.23818	1.7936e-14	3.2215e-13	up		TraesCS1D02G268500	0.127651	-2.96972	5.38018e-72	6.15403e-70	down
TraesCS1D02G269700	2.40449	1.26573	2.42418e-08	2.50155e-07	up		TraesCS1D02G270700	0.15907	-2.65226	2.48278e-20	6.22249e-19	down
TraesCS1D02G271500	3.10407	1.63416	5.91988e-25	1.82306e-23	up		TraesCS1D02G272300	0.40164	-1.31603	0.0123716	0.0433037	down
TraesCS1D02G273500	2.39373	1.25926	9.6384e-09	1.04307e-07	up		TraesCS1D02G274200	0.340302	-1.55511	4.07122e-05	0.000265078	down
TraesCS1D02G276600	14.8526	3.89264	8.78812e-46	5.54746e-44	up		TraesCS1D02G274600	0.490661	-1.0272	4.65037e-08	4.65588e-07	down
TraesCS1D02G277900	2.24311	1.1655	1.92775e-24	5.83328e-23	up		TraesCS1D02G276000	0.417281	-1.26091	0.00526137	0.0208726	down
TraesCS1D02G278100	5.48675	2.45595	3.35534e-69	3.64605e-67	up		TraesCS1D02G276100	0.336	-1.57347	1.50921e-05	0.000106208	down
TraesCS1D02G279000	3.47202	1.79577	2.15983e-09	2.5275e-08	up		TraesCS1D02G278800	0.397437	-1.3312	1.94413e-15	3.71792e-14	down
TraesCS1D02G279500	2.1292	1.09031	1.96374e-17	4.20617e-16	up		TraesCS1D02G280600	0.475986	-1.07101	4.98775e-30	1.93321e-28	down
TraesCS1D02G279600	2.6859	1.42541	5.75496e-30	2.22491e-28	up		TraesCS1D02G283200	0.0342503	-4.86774	0.00475384	0.0191387	down
TraesCS1D02G280700	2.49186	1.31722	1.1358e-26	3.79549e-25	up		TraesCS1D02G284000	0.455585	-1.13421	2.15414e-06	1.72592e-05	down
TraesCS1D02G281800	22.3811	4.48421	5.71706e-238	5.11609e-235	up		TraesCS1D02G284300	0.0466397	-4.4223	0.0122012	0.0427961	down
TraesCS1D02G282000	6.27714	2.65011	0.00722055	0.027359	up		TraesCS1D02G285900	0.48838	-1.03392	0.000499444	0.00260073	down
TraesCS1D02G288500	2.57564	1.36493	7.3476e-08	7.17798e-07	up		TraesCS1D02G286100	0.0119709	-6.38433	1.43306e-24	4.36024e-23	down
TraesCS1D02G288700	2.29923	1.20115	6.03475e-17	1.26021e-15	up		TraesCS1D02G292700	0.234079	-2.09493	2.27068e-75	2.76905e-73	down
TraesCS1D02G288800	2.11278	1.07914	3.94993e-18	8.84656e-17	up		TraesCS1D02G293900	0.230875	-2.11481	9.06001e-59	7.99014e-57	down
TraesCS1D02G289700	37.8945	5.24392	0.000702321	0.00352563	up		TraesCS1D02G294000	0.27679	-1.85314	2.22968e-06	1.78246e-05	down
TraesCS1D02G290500	2.16794	1.11632	0.000703852	0.00353157	up		TraesCS1D02G296500	0.149962	-2.73733	7.57229e-06	5.57856e-05	down
TraesCS1D02G292000	2.55394	1.35272	8.01039e-50	5.63524e-48	up		TraesCS1D02G298200	0.444139	-1.17092	0.00911591	0.033355	down
TraesCS1D02G292100	2.17022	1.11784	1.09319e-11	1.57526e-10	up		TraesCS1D02G305100	0.360066	-1.47367	1.05905e-13	1.79564e-12	down
TraesCS1D02G295800	2.5536	1.35253	2.23125e-26	7.33925e-25	up		TraesCS1D02G305700	0.392835	-1.348	0.000136635	0.000802324	down
TraesCS1D02G299400	2.38415	1.25347	4.86069e-34	2.16691e-32	up		TraesCS1D02G307700	0.0913374	-3.45265	0.0121487	0.0426437	down
TraesCS1D02G300000	2.14128	1.09847	4.93143e-06	3.7422e-05	up		TraesCS1D02G309100	0.363543	-1.4598	8.55057e-07	7.26805e-06	down
TraesCS1D02G300700	91.0521	6.50862	3.35133e-07	3.01813e-06	up		TraesCS1D02G309200	0.136592	-2.87205	2.51982e-10	3.22541e-09	down
TraesCS1D02G302500	12.3759	3.62946	2.61152e-13	4.32191e-12	up		TraesCS1D02G309400	0.0280314	-5.15681	0.00021008	0.00118577	down
TraesCS1D02G303700	2.20847	1.14305	1.37887e-46	8.86966e-45	up		TraesCS1D02G311300	0.273128	-1.87235	1.76016e-05	0.000122243	down
TraesCS1D02G304700	5.1016	2.35095	0.00139461	0.00651454	up		TraesCS1D02G313100	0.0292633	-5.09476	7.03985e-10	8.63514e-09	down
TraesCS1D02G305000	3.21322	1.68402	8.92209e-30	3.41249e-28	up		TraesCS1D02G317300	0.193666	-2.36836	0.00935541	0.0340875	down
TraesCS1D02G305500	2.67744	1.42086	6.77682e-17	1.4113e-15	up		TraesCS1D02G321300	0.436055	-1.19742	7.34647e-07	6.30977e-06	down
TraesCS1D02G312500	4.06039	2.02162	0.000200142	0.00113473	up		TraesCS1D02G321700	0.036777	-4.76505	0.00407097	0.0167056	down
TraesCS1D02G312600	3.19997	1.67806	3.38243e-15	6.37435e-14	up		TraesCS1D02G324200	0.284828	-1.81183	6.68677e-141	2.22352e-138	down
TraesCS1D02G315200	7.72145	2.94887	1.45376e-06	1.19465e-05	up		TraesCS1D02G325100	0.265965	-1.91069	0.00014265	0.000834103	down
TraesCS1D02G320800	3.0437	1.60582	3.74795e-24	1.12294e-22	up		TraesCS1D02G325300	0.111757	-3.16157	6.6937e-27	2.25166e-25	down
TraesCS1D02G323200	3.48135	1.79965	3.03669e-13	4.99698e-12	up		TraesCS1D02G332600	0.47683	-1.06845	0.0114859	0.0406527	down
TraesCS1D02G323300	4.19593	2.06899	3.73927e-62	3.49527e-60	up		TraesCS1D02G334300	0.141545	-2.82067	0.00017856	0.00102458	down
TraesCS1D02G323500	2.09205	1.06492	2.88252e-13	4.75101e-12	up		TraesCS1D02G337300	0.350869	-1.511	5.34408e-23	1.52104e-21	down
TraesCS1D02G330300	3.17553	1.667	0.010263	0.03688	up		TraesCS1D02G340700	0.237183	-2.07592	1.67747e-08	1.7633e-07	down
TraesCS1D02G331600	3.24438	1.69794	0.00646118	0.0248845	up		TraesCS1D02G340900	0.443172	-1.17406	2.36677e-10	3.03845e-09	down
TraesCS1D02G334400	5.78904	2.53332	2.98177e-20	7.44245e-19	up		TraesCS1D02G343300	0.387563	-1.3675	0.000312582	0.00169817	down
TraesCS1D02G335400	16.1509	4.01355	0.00156514	0.00721313	up		TraesCS1D02G344200	0.37409	-1.41854	0.00968079	0.0350944	down
TraesCS1D02G335700	2.18164	1.12541	0.00189848	0.00855622	up		TraesCS1D02G349600	0.495785	-1.01221	2.81422e-06	2.21197e-05	down
TraesCS1D02G335900	2.38233	1.25237	2.12126e-26	6.99636e-25	up		TraesCS1D02G350100	0.484559	-1.04526	3.2819e-07	2.95955e-06	down
TraesCS1D02G336900	8.81904	3.14062	3.56937e-70	3.94915e-68	up		TraesCS1D02G353800	0.138628	-2.85071	6.26416e-89	9.90095e-87	down
TraesCS1D02G338200	24.4077	4.60926	0.000121594	0.000721875	up		TraesCS1D02G357600	0.169551	-2.56021	4.78347e-99	8.92895e-97	down
TraesCS1D02G338500	32.9933	5.0441	1.03206e-09	1.2451e-08	up		TraesCS1D02G362700	0.268081	-1.89926	1.40676e-43	8.40908e-42	down
TraesCS1D02G339800	38.5512	5.2687	3.25354e-137	1.04754e-134	up		TraesCS1D02G363500	0.486924	-1.03823	1.35213e-05	9.58637e-05	down
TraesCS1D02G342300	5.45944	2.44875	0.00467011	0.0188477	up		TraesCS1D02G364700	0.39682	-1.33344	8.19936e-11	1.09779e-09	down
TraesCS1D02G343900	2.53429	1.34158	0.000232629	0.00129914	up		TraesCS1D02G364800	0.306569	-1.70571	8.69475e-07	7.38132e-06	down
TraesCS1D02G345100	2.03397	1.0243	4.08274e-06	3.1381e-05	up		TraesCS1D02G365800	0.404449	-1.30597	0.00926415	0.0338174	down
TraesCS1D02G348400	5.63873	2.49537	0.000134708	0.000791916	up		TraesCS1D02G371400	0.339356	-1.55913	0.00537534	0.0212637	down
TraesCS1D02G349200	21.0863	4.39823	1.25211e-05	8.92819e-05	up		TraesCS1D02G371500	0.0496015	-4.33347	0.00410321	0.0168141	down
TraesCS1D02G350400	2.81654	1.49392	0.00306538	0.0130098	up		TraesCS1D02G371900	0.0584883	-4.09571	0.00143705	0.00669428	down
TraesCS1D02G358400	3.01333	1.59136	2.59438e-11	3.61349e-10	up		TraesCS1D02G375000	0.036717	-4.76741	0.00416778	0.0170488	down
TraesCS1D02G358500	4.16583	2.0586	1.23978e-97	2.23867e-95	up		TraesCS1D02G375500	0.483055	-1.04974	0.00116259	0.0055439	down
TraesCS1D02G359100	81.5897	6.35032	5.69679e-09	6.33055e-08	up		TraesCS1D02G375600	0.290961	-1.7811	1.42449e-08	1.51174e-07	down
TraesCS1D02G359400	4.92578	2.30035	0.000913548	0.00447018	up		TraesCS1D02G376400	0.287601	-1.79786	1.19815e-08	1.28227e-07	down
TraesCS1D02G361000	14.5831	3.86622	4.20091e-87	6.37491e-85	up		TraesCS1D02G378600	0.0390622	-4.67808	1.40875e-06	1.15986e-05	down
TraesCS1D02G362900	6.91667	2.79008	3.7045e-12	5.5702e-11	up		TraesCS1D02G379000	0.385887	-1.37375	3.9577e-40	2.12188e-38	down
TraesCS1D02G363300	7.35034	2.87781	0.00101208	0.00489876	up		TraesCS1D02G380900	0.267033	-1.90491	8.10612e-43	4.76593e-41	down
TraesCS1D02G363800	7.1156	2.83098	1.12236e-40	6.10346e-39	up		TraesCS1D02G383700	0.281985	-1.82631	0.00399418	0.0164337	down
TraesCS1D02G367000	2.38024	1.25111	1.81987e-39	9.59644e-38	up		TraesCS1D02G383900	0.0415903	-4.58761	0.00940909	0.0342462	down
TraesCS1D02G368900	4.10639	2.03787	3.65476e-120	9.4237e-118	up		TraesCS1D02G389100	0.114535	-3.12614	2.76577e-05	0.000186011	down
TraesCS1D02G369600	2.13587	1.09482	2.23218e-20	5.60135e-19	up		TraesCS1D02G389200	0.218655	-2.19327	1.39016e-07	1.31378e-06	down
TraesCS1D02G371200	3.73693	1.90185	2.5338e-36	1.21026e-34	up		TraesCS1D02G390600	0.334745	-1.57887	0.010628	0.038003	down
TraesCS1D02G372400	6.69665	2.74344	4.47321e-06	3.41664e-05	up		TraesCS1D02G392900	0.183093	-2.44935	0.000543629	0.0028017	down
TraesCS1D02G372500	3.22614	1.68981	1.41563e-12	2.20317e-11	up		TraesCS1D02G395200	0.184002	-2.44221	0.00971885	0.0352052	down
TraesCS1D02G372700	2.81721	1.49427	3.17276e-10	4.0273e-09	up		TraesCS1D02G396300	0.322449	-1.63286	3.44936e-65	3.42494e-63	down
TraesCS1D02G372900	4.7926	2.26081	7.6749e-19	1.78803e-17	up		TraesCS1D02G402600	0.43124	-1.21344	0.00371662	0.0154252	down
TraesCS1D02G375700	5.60096	2.48567	2.1061e-89	3.34623e-87	up		TraesCS1D02G403500	0.450675	-1.14984	0.0031577	0.0133634	down
TraesCS1D02G376500	7.14603	2.83714	3.67541e-27	1.25297e-25	up		TraesCS1D02G404700	0.0152754	-6.03265	3.2019e-06	2.4951e-05	down
TraesCS1D02G376600	2.73817	1.45321	2.85176e-12	4.32756e-11	up		TraesCS1D02G404800	0.397167	-1.33218	1.53458e-39	8.12021e-38	down
TraesCS1D02G376700	2.3447	1.22941	8.52609e-13	1.35253e-11	up		TraesCS1D02G406800	0.401304	-1.31723	0.00674738	0.0258055	down
TraesCS1D02G376800	2.77543	1.47271	9.21328e-33	3.9261e-31	up		TraesCS1D02G411000	0.402387	-1.31335	1.51177e-14	2.73223e-13	down
TraesCS1D02G378500	2.72778	1.44773	1.98103e-09	2.32272e-08	up		TraesCS1D02G411100	0.26016	-1.94253	0.00043167	0.00227882	down
TraesCS1D02G378900	2.73908	1.45369	0.00163512	0.0074942	up		TraesCS1D02G411300	0.163396	-2.61356	1.47693e-210	9.87628e-208	down
TraesCS1D02G381800	2.31792	1.21283	0.00153377	0.00708518	up		TraesCS1D02G414700	0.324425	-1.62404	4.38376e-25	1.35549e-23	down
TraesCS1D02G385400	9.60247	3.26341	3.64097e-19	8.59426e-18	up		TraesCS1D02G418000	0.0407915	-4.61559	8.38162e-36	3.95379e-34	down
TraesCS1D02G387100	3.2825	1.71479	0.000782481	0.00388476	up		TraesCS1D02G418400	0.312181	-1.67954	4.91518e-05	0.000315372	down
TraesCS1D02G392000	6.21923	2.63674	2.94644e-12	4.46456e-11	up		TraesCS1D02G419400	0.315607	-1.6638	3.1407e-41	1.74218e-39	down
TraesCS1D02G392500	19.8739	4.3128	7.20461e-46	4.56207e-44	up		TraesCS1D02G420900	0.160784	-2.63681	6.16053e-08	6.06504e-07	down
TraesCS1D02G398300	21.5795	4.43159	0.0128211	0.0446664	up		TraesCS1D02G426600	0.0328999	-4.92577	2.51653e-05	0.000170587	down
TraesCS1D02G399400	11.8117	3.56215	8.04442e-22	2.16793e-20	up		TraesCS1D02G428200	0.487894	-1.03536	5.91715e-34	2.63017e-32	down
TraesCS1D02G399900	2.11496	1.08063	0.000126778	0.000750019	up		TraesCS1D02G429200	0.349752	-1.5156	0.00654668	0.0251518	down
TraesCS1D02G400000	5.02369	2.32875	6.16883e-56	5.05911e-54	up		TraesCS1D02G432300	0.498664	-1.00386	3.46155e-06	2.68334e-05	down
TraesCS1D02G407200	22.4781	4.49045	0.0133083	0.0460344	up		TraesCS1D02G440500	0.113312	-3.14162	5.8845e-30	2.2721e-28	down
TraesCS1D02G409700	2.57792	1.36621	1.44475e-33	6.34315e-32	up		TraesCS2A02G016500	0.206347	-2.27686	0.00563485	0.0221564	down
TraesCS1D02G410100	12.5269	3.64695	6.38978e-79	8.23794e-77	up		TraesCS2A02G016700	0.470793	-1.08684	0.000462522	0.00242758	down
TraesCS1D02G412000	3.96732	1.98817	1.78093e-35	8.29175e-34	up		TraesCS2A02G028400	0.391364	-1.35342	4.5719e-06	3.48764e-05	down
TraesCS1D02G412800	8.26786	3.04751	4.78442e-26	1.55027e-24	up		TraesCS2A02G032400	0.206576	-2.27526	0.00947033	0.03443	down
TraesCS1D02G412900	70.5607	6.14079	9.50591e-06	6.91682e-05	up		TraesCS2A02G035700	0.275779	-1.85841	7.82768e-05	0.000481872	down
TraesCS1D02G413000	25.5997	4.67806	1.86956e-09	2.19584e-08	up		TraesCS2A02G038400	0.480974	-1.05597	1.19888e-05	8.58186e-05	down
TraesCS1D02G413100	58.9991	5.88262	8.98705e-08	8.69167e-07	up		TraesCS2A02G039400	0.332462	-1.58874	3.52478e-26	1.15255e-24	down
TraesCS1D02G413200	5.1174	2.35541	5.30494e-05	0.000338311	up		TraesCS2A02G039700	0.496506	-1.01012	0.00848218	0.0313678	down
TraesCS1D02G413300	5.22654	2.38586	6.95873e-14	1.19856e-12	up		TraesCS2A02G058500	0.199693	-2.32415	0.0130588	0.0453389	down
TraesCS1D02G413400	4.99312	2.31994	1.69893e-05	0.000118369	up		TraesCS2A02G064000	0.286012	-1.80585	0.00373811	0.0154975	down
TraesCS1D02G424800	2.02631	1.01885	0.00942625	0.0342906	up		TraesCS2A02G067500	0.169855	-2.55763	5.28016e-06	3.9914e-05	down
TraesCS1D02G426800	4.83686	2.27407	5.88818e-44	3.54059e-42	up		TraesCS2A02G068300	0.445982	-1.16494	0.000910038	0.00445516	down
TraesCS1D02G426900	6.61858	2.72652	6.60785e-08	6.48968e-07	up		TraesCS2A02G071600	0.395078	-1.33979	1.49515e-15	2.87465e-14	down
TraesCS1D02G427000	4.00662	2.00239	2.60181e-47	1.70425e-45	up		TraesCS2A02G075600	0.0533824	-4.22749	0.00580783	0.0227293	down
TraesCS1D02G430700	60.6816	5.92319	5.93983e-11	8.04475e-10	up		TraesCS2A02G081900	0.451761	-1.14637	9.44061e-08	9.10717e-07	down
TraesCS1D02G431400	2.33815	1.22537	0.00456163	0.0184576	up		TraesCS2A02G088300	0.0907755	-3.46155	9.77255e-13	1.54222e-11	down
TraesCS1D02G431700	2.41289	1.27076	1.32629e-06	1.09568e-05	up		TraesCS2A02G089400	0.446915	-1.16193	4.58419e-08	4.59265e-07	down
TraesCS1D02G432800	9.59534	3.26233	2.48244e-19	5.92862e-18	up		TraesCS2A02G091100	0.302924	-1.72297	4.94983e-07	4.35333e-06	down
TraesCS1D02G439400	5.00614	2.3237	2.11416e-07	1.95459e-06	up		TraesCS2A02G092000	0.457288	-1.12882	0.0056122	0.0220759	down
TraesCS1D02G439500	2.96873	1.56985	7.52068e-29	2.75194e-27	up		TraesCS2A02G093800	0.184052	-2.44182	0.0014206	0.00662301	down
TraesCS1D02G441600	5.43074	2.44115	3.33343e-11	4.60548e-10	up		TraesCS2A02G094500	0.125249	-2.99713	4.33958e-05	0.000281047	down
TraesCS1D02G441700	5.93682	2.56969	7.60161e-11	1.01888e-09	up		TraesCS2A02G094700	0.143345	-2.80244	7.31696e-06	5.40419e-05	down
TraesCS1D02G444500	10.17	3.34624	8.21464e-08	7.98315e-07	up		TraesCS2A02G098400	0.257687	-1.95631	0.000113837	0.000679071	down
TraesCS1D02G449600	2.38811	1.25587	1.81911e-10	2.36128e-09	up		TraesCS2A02G103300	0.293546	-1.76834	0.0134841	0.0465579	down
TraesCS2A02G000600	3.70144	1.88809	4.0681e-41	2.25457e-39	up		TraesCS2A02G106800	0.282479	-1.82378	2.69332e-06	2.12573e-05	down
TraesCS2A02G011000	2.88487	1.5285	3.07671e-06	2.40586e-05	up		TraesCS2A02G112600	0.180269	-2.47177	1.60764e-18	3.675e-17	down
TraesCS2A02G023000	39.8257	5.31563	0.000575937	0.00295306	up		TraesCS2A02G113400	0.011438	-6.45003	3.12399e-06	2.44033e-05	down
TraesCS2A02G024700	6.39571	2.6771	6.37489e-06	4.76507e-05	up		TraesCS2A02G114600	0.111373	-3.16653	7.58674e-90	1.21492e-87	down
TraesCS2A02G024800	2.7079	1.43717	1.06134e-10	1.40646e-09	up		TraesCS2A02G116000	0.371045	-1.43033	0.0030219	0.0128378	down
TraesCS2A02G024900	2.31905	1.21354	8.5074e-13	1.34991e-11	up		TraesCS2A02G116100	0.0110135	-6.50458	7.96532e-84	1.12985e-81	down
TraesCS2A02G025700	49.3627	5.62535	0.000118581	0.000705434	up		TraesCS2A02G117900	0.426451	-1.22955	4.17731e-08	4.20092e-07	down
TraesCS2A02G026500	34.8751	5.12412	0.000211542	0.00119281	up		TraesCS2A02G120300	0.225956	-2.14589	0.000132776	0.000781253	down
TraesCS2A02G027500	109.396	6.77341	4.34443e-07	3.84982e-06	up		TraesCS2A02G125500	0.480739	-1.05668	3.10584e-09	3.57111e-08	down
TraesCS2A02G027700	19.6995	4.30008	0.000538594	0.00278033	up		TraesCS2A02G132600	0.461823	-1.11459	4.23143e-26	1.37622e-24	down
TraesCS2A02G027800	7.98019	2.99642	5.44723e-09	6.07097e-08	up		TraesCS2A02G136100	0.0535242	-4.22366	3.96328e-05	0.000258659	down
TraesCS2A02G028000	14.5463	3.86258	0.00290103	0.0123944	up		TraesCS2A02G141700	0.130217	-2.94101	3.64271e-05	0.000239303	down
TraesCS2A02G028700	2.69077	1.42802	1.25001e-06	1.03844e-05	up		TraesCS2A02G143200	0.231031	-2.11384	8.33207e-14	1.42462e-12	down
TraesCS2A02G029700	4.33471	2.11593	2.32879e-25	7.30095e-24	up		TraesCS2A02G143400	0.125399	-2.99541	6.60997e-220	5.02787e-217	down
TraesCS2A02G029900	2.59494	1.3757	6.02155e-39	3.12995e-37	up		TraesCS2A02G146000	0.263475	-1.92426	1.74337e-14	3.13497e-13	down
TraesCS2A02G031400	6.11073	2.61134	3.66171e-13	5.99629e-12	up		TraesCS2A02G151800	0.467257	-1.09771	0.00231797	0.0101836	down
TraesCS2A02G031500	31.1379	4.9606	0.000423245	0.00223842	up		TraesCS2A02G153300	0.307612	-1.70082	7.152e-07	6.15665e-06	down
TraesCS2A02G035500	5.64648	2.49735	0.00097362	0.00473443	up		TraesCS2A02G157400	0.122564	-3.0284	3.80888e-133	1.17654e-130	down
TraesCS2A02G037300	2.29573	1.19895	1.59932e-08	1.68464e-07	up		TraesCS2A02G157600	0.454535	-1.13754	8.54876e-08	8.28622e-07	down
TraesCS2A02G044200	5.56292	2.47584	0.000942587	0.00459749	up		TraesCS2A02G160400	0.492646	-1.02138	0.0104682	0.0375177	down
TraesCS2A02G046100	3.5541	1.82949	2.16358e-70	2.40692e-68	up		TraesCS2A02G160700	0.0448602	-4.47842	0.00237486	0.010408	down
TraesCS2A02G046500	11.5298	3.52729	6.71665e-10	8.252e-09	up		TraesCS2A02G161500	0.158364	-2.65868	9.6059e-74	1.14841e-71	down
TraesCS2A02G046700	4.14906	2.05278	9.98842e-26	3.18561e-24	up		TraesCS2A02G163600	0.440155	-1.18392	3.40952e-23	9.79123e-22	down
TraesCS2A02G046800	2.18492	1.12758	1.4785e-05	0.000104228	up		TraesCS2A02G169600	0.161754	-2.62813	1.91706e-94	3.30474e-92	down
TraesCS2A02G048600	11.7523	3.55487	4.58455e-219	3.40218e-216	up		TraesCS2A02G174500	0.266016	-1.91041	3.70055e-26	1.20678e-24	down
TraesCS2A02G053000	7.50054	2.90699	0.000495873	0.00258379	up		TraesCS2A02G177700	0.474509	-1.07549	0.00226989	0.00999764	down
TraesCS2A02G053100	2.08488	1.05996	1.26713e-12	1.98067e-11	up		TraesCS2A02G183200	0.239577	-2.06144	3.42729e-08	3.47886e-07	down
TraesCS2A02G053300	3.38985	1.76122	0.0002337	0.00130421	up		TraesCS2A02G184000	0.415255	-1.26793	0.000200697	0.00113735	down
TraesCS2A02G056100	3.42087	1.77436	0.000621691	0.00316155	up		TraesCS2A02G187200	0.481953	-1.05304	2.72371e-58	2.35765e-56	down
TraesCS2A02G056400	4.91353	2.29676	2.88282e-28	1.03435e-26	up		TraesCS2A02G188700	0.368609	-1.43984	8.69006e-72	9.90276e-70	down
TraesCS2A02G057900	3.53409	1.82134	0.000145504	0.000849161	up		TraesCS2A02G193900	0.385854	-1.37387	0.00798919	0.0298026	down
TraesCS2A02G066400	10.5898	3.40461	3.31658e-11	4.5837e-10	up		TraesCS2A02G194500	0.0206642	-5.59672	9.59972e-34	4.24537e-32	down
TraesCS2A02G066500	65.4381	6.03206	2.97122e-06	2.32726e-05	up		TraesCS2A02G201800	0.495039	-1.01439	1.97265e-07	1.83155e-06	down
TraesCS2A02G067000	2.43344	1.283	5.7144e-09	6.3478e-08	up		TraesCS2A02G209700	0.253824	-1.9781	0.00893085	0.032782	down
TraesCS2A02G067200	4.33131	2.1148	1.46851e-50	1.05379e-48	up		TraesCS2A02G209900	0.481833	-1.0534	7.7285e-09	8.44487e-08	down
TraesCS2A02G069700	11.3334	3.50251	0.00256238	0.0111161	up		TraesCS2A02G211400	0.170249	-2.55428	0.000217054	0.00122083	down
TraesCS2A02G072400	3.78937	1.92196	8.71127e-15	1.5962e-13	up		TraesCS2A02G214800	0.33554	-1.57544	3.63446e-05	0.000238812	down
TraesCS2A02G075000	89.9348	6.49081	1.6625e-09	1.96554e-08	up		TraesCS2A02G215800	0.45086	-1.14925	0.00135742	0.00636327	down
TraesCS2A02G076500	343.465	8.42402	1.4898e-37	7.40666e-36	up		TraesCS2A02G215900	0.138898	-2.8479	1.59424e-17	3.44017e-16	down
TraesCS2A02G076600	5.80158	2.53645	0.0125712	0.0439369	up		TraesCS2A02G217300	0.313975	-1.67128	0.00334218	0.0140445	down
TraesCS2A02G078100	13.894	3.79639	5.53538e-05	0.000351533	up		TraesCS2A02G219600	0.190732	-2.39038	1.85907e-07	1.73005e-06	down
TraesCS2A02G080000	2.1731	1.11975	0.000398869	0.00212131	up		TraesCS2A02G222300	0.285819	-1.80683	6.28868e-05	0.000395043	down
TraesCS2A02G081300	3.96664	1.98792	4.94601e-12	7.36059e-11	up		TraesCS2A02G225200	0.339777	-1.55734	4.11804e-161	1.67061e-158	down
TraesCS2A02G083600	7.10292	2.82841	0.00166869	0.00762792	up		TraesCS2A02G228800	0.489361	-1.03103	0.000401038	0.00213116	down
TraesCS2A02G084000	2.51421	1.33011	2.33953e-30	9.1671e-29	up		TraesCS2A02G230000	0.233482	-2.09862	0.0130212	0.0452366	down
TraesCS2A02G084700	2.35864	1.23795	3.07681e-05	0.000204735	up		TraesCS2A02G233600	0.301102	-1.73168	0.000196711	0.00111819	down
TraesCS2A02G084800	2.59235	1.37426	5.51591e-67	5.67942e-65	up		TraesCS2A02G242700	0.249151	-2.0049	0.00183573	0.00830234	down
TraesCS2A02G090600	4.72402	2.24002	1.67474e-69	1.82965e-67	up		TraesCS2A02G243200	0.420665	-1.24926	8.37392e-18	1.84293e-16	down
TraesCS2A02G096400	14.4228	3.85028	1.07991e-14	1.96751e-13	up		TraesCS2A02G243400	0.409401	-1.28841	6.86909e-23	1.94163e-21	down
TraesCS2A02G097200	29.1103	4.86346	0.00294682	0.0125698	up		TraesCS2A02G253900	0.380008	-1.3959	3.11749e-31	1.2555e-29	down
TraesCS2A02G097400	2.17595	1.12165	1.95236e-46	1.24664e-44	up		TraesCS2A02G255100	0.441825	-1.17845	3.61843e-05	0.000237862	down
TraesCS2A02G099300	2.17154	1.11872	0.00180608	0.00817858	up		TraesCS2A02G258900	0.111521	-3.16461	1.19898e-66	1.23244e-64	down
TraesCS2A02G100300	2.42861	1.28013	7.63361e-18	1.68488e-16	up		TraesCS2A02G264800	0.157705	-2.6647	8.03343e-46	5.07633e-44	down
TraesCS2A02G101000	11.6616	3.5437	3.40643e-05	0.000224824	up		TraesCS2A02G265900	0.327256	-1.61151	0.00044805	0.00235875	down
TraesCS2A02G101100	5.84971	2.54836	4.75341e-11	6.4899e-10	up		TraesCS2A02G266900	0.214209	-2.22291	0.00195485	0.00877325	down
TraesCS2A02G101400	3.41514	1.77194	3.05884e-71	3.43426e-69	up		TraesCS2A02G268700	0.320721	-1.64061	6.24226e-86	9.26473e-84	down
TraesCS2A02G101900	3.55302	1.82905	6.07696e-20	1.49533e-18	up		TraesCS2A02G269700	0.12607	-2.9877	3.72462e-05	0.000244235	down
TraesCS2A02G102000	5.54185	2.47037	7.24234e-90	1.16283e-87	up		TraesCS2A02G274700	0.11417	-3.13074	2.77073e-238	2.51649e-235	down
TraesCS2A02G104100	3.86407	1.95012	3.09965e-08	3.16742e-07	up		TraesCS2A02G274800	0.302183	-1.72651	1.548e-11	2.20194e-10	down
TraesCS2A02G104800	6.92541	2.7919	1.30153e-11	1.86398e-10	up		TraesCS2A02G281700	0.491209	-1.02559	0.00917143	0.0335356	down
TraesCS2A02G104900	14.6325	3.8711	3.08553e-08	3.15405e-07	up		TraesCS2A02G283600	0.241438	-2.05028	0.000720829	0.00360901	down
TraesCS2A02G105700	2.12617	1.08826	0.00721908	0.0273551	up		TraesCS2A02G284000	0.1218	-3.03741	0.0134232	0.0463765	down
TraesCS2A02G106500	3.68455	1.88149	7.49919e-59	6.62323e-57	up		TraesCS2A02G285900	0.0709952	-3.81613	6.72622e-09	7.40956e-08	down
TraesCS2A02G107600	17.2397	4.10767	1.70936e-20	4.32148e-19	up		TraesCS2A02G287200	0.419929	-1.25178	1.10903e-20	2.82725e-19	down
TraesCS2A02G110900	2.9274	1.54962	0.00133771	0.00628151	up		TraesCS2A02G290600	0.27236	-1.87642	5.91062e-61	5.38433e-59	down
TraesCS2A02G112400	2.17521	1.12115	4.66607e-06	3.55236e-05	up		TraesCS2A02G295100	0.376862	-1.40789	0.000697227	0.0035015	down
TraesCS2A02G117600	2.19737	1.13578	0.0030298	0.0128696	up		TraesCS2A02G301400	0.163098	-2.61619	3.7087e-245	3.82511e-242	down
TraesCS2A02G121000	9.1645	3.19606	1.66272e-160	6.65656e-158	up		TraesCS2A02G301600	0.274655	-1.86431	7.28838e-05	0.000451366	down
TraesCS2A02G127100	2.52155	1.33431	9.83651e-105	1.97548e-102	up		TraesCS2A02G302300	0.35227	-1.50525	2.03867e-113	4.6814e-111	down
TraesCS2A02G132400	2.18093	1.12494	0.000563941	0.00289741	up		TraesCS2A02G302500	0.134128	-2.89831	7.12936e-06	5.27588e-05	down
TraesCS2A02G134000	4.37181	2.12823	2.44169e-130	7.24789e-128	up		TraesCS2A02G302700	0.110092	-3.18321	1.08233e-16	2.22207e-15	down
TraesCS2A02G135800	2.04799	1.03421	8.95076e-21	2.29142e-19	up		TraesCS2A02G305100	0.185571	-2.42996	0.00438495	0.0178174	down
TraesCS2A02G136200	2.77361	1.47177	2.38234e-08	2.46045e-07	up		TraesCS2A02G305600	0.483403	-1.0487	0.000449928	0.00236781	down
TraesCS2A02G136600	3.19027	1.67368	2.01375e-07	1.86787e-06	up		TraesCS2A02G306800	0.209664	-2.25385	0.00419726	0.0171486	down
TraesCS2A02G136700	2.50448	1.32451	1.80473e-13	3.01873e-12	up		TraesCS2A02G309000	0.185166	-2.43311	0.00941239	0.0342504	down
TraesCS2A02G136800	2.66941	1.41652	6.07876e-48	4.05597e-46	up		TraesCS2A02G310100	0.499892	-1.00031	0.000647687	0.00327896	down
TraesCS2A02G139600	18.1804	4.18431	2.15197e-22	5.93078e-21	up		TraesCS2A02G314600	0.408408	-1.29192	0.00237377	0.010404	down
TraesCS2A02G143300	4.46442	2.15847	1.95269e-37	9.6763e-36	up		TraesCS2A02G314700	0.246671	-2.01934	0.000209335	0.00118233	down
TraesCS2A02G145800	7.37917	2.88346	7.49153e-20	1.83377e-18	up		TraesCS2A02G316500	0.0379208	-4.72087	1.89227e-16	3.83317e-15	down
TraesCS2A02G155500	2.1518	1.10555	1.81097e-27	6.27927e-26	up		TraesCS2A02G321700	0.142076	-2.81527	0.0122672	0.0429819	down
TraesCS2A02G158800	3.19269	1.67477	0.00645499	0.0248654	up		TraesCS2A02G322500	0.405007	-1.30398	4.30095e-07	3.81241e-06	down
TraesCS2A02G161300	2.2	1.1375	3.02216e-49	2.10417e-47	up		TraesCS2A02G325100	0.0922301	-3.43862	0.0143503	0.049056	down
TraesCS2A02G163000	2.02454	1.0176	1.60845e-35	7.50593e-34	up		TraesCS2A02G325800	0.0251174	-5.31517	8.81635e-39	4.55041e-37	down
TraesCS2A02G166000	2.27703	1.18715	1.8385e-16	3.72673e-15	up		TraesCS2A02G326100	0.260766	-1.93917	2.21896e-11	3.10909e-10	down
TraesCS2A02G166300	2.32399	1.2166	0.00023722	0.00132192	up		TraesCS2A02G333600	0.194994	-2.3585	0.00253843	0.0110256	down
TraesCS2A02G167300	3.61498	1.85399	1.59692e-68	1.70185e-66	up		TraesCS2A02G338300	0.429597	-1.21894	7.0889e-07	6.10578e-06	down
TraesCS2A02G167400	2.25586	1.17368	0.000166775	0.0009625	up		TraesCS2A02G339100	0.0456984	-4.45171	0.0145129	0.0495172	down
TraesCS2A02G169300	3.52739	1.8186	6.8038e-177	3.13655e-174	up		TraesCS2A02G339200	0.464279	-1.10694	1.46967e-06	1.20675e-05	down
TraesCS2A02G170000	3.72508	1.89727	4.08425e-54	3.20277e-52	up		TraesCS2A02G342600	0.467667	-1.09645	3.93887e-21	1.02475e-19	down
TraesCS2A02G170200	2.35995	1.23876	9.73895e-54	7.59788e-52	up		TraesCS2A02G345500	0.00225902	-8.79009	5.2553e-13	8.48714e-12	down
TraesCS2A02G170400	2.0433	1.0309	7.54486e-08	7.36005e-07	up		TraesCS2A02G345800	0.356512	-1.48798	0.000163179	0.000944254	down
TraesCS2A02G170600	2.88139	1.52677	7.73786e-65	7.60685e-63	up		TraesCS2A02G348100	0.425414	-1.23306	0.00102707	0.00496303	down
TraesCS2A02G170900	2.12779	1.08936	4.84024e-13	7.8439e-12	up		TraesCS2A02G348800	0.388655	-1.36344	0.00202357	0.00905031	down
TraesCS2A02G175900	2.47339	1.30649	1.40334e-09	1.67312e-08	up		TraesCS2A02G351300	0.18638	-2.42368	4.19181e-09	4.74126e-08	down
TraesCS2A02G177300	2.16906	1.11707	4.42737e-32	1.83901e-30	up		TraesCS2A02G351900	0.400769	-1.31916	0.000445707	0.00234803	down
TraesCS2A02G182400	2.09822	1.06917	6.00954e-17	1.25581e-15	up		TraesCS2A02G367700	0.206316	-2.27707	4.6625e-80	6.20837e-78	down
TraesCS2A02G182600	2.43555	1.28425	1.21736e-61	1.12411e-59	up		TraesCS2A02G369700	0.447108	-1.1613	1.8236e-14	3.27247e-13	down
TraesCS2A02G182800	2.13661	1.09533	1.61031e-11	2.2863e-10	up		TraesCS2A02G370500	0.284533	-1.81333	0.0140375	0.0481408	down
TraesCS2A02G183900	2.05094	1.03629	6.40908e-34	2.84656e-32	up		TraesCS2A02G371200	0.18862	-2.40644	0.00246075	0.010737	down
TraesCS2A02G187800	2.78383	1.47707	1.09681e-30	4.35091e-29	up		TraesCS2A02G371400	0.00739892	-7.07847	4.42647e-08	4.44268e-07	down
TraesCS2A02G188600	2.0646	1.04586	9.39894e-58	7.99922e-56	up		TraesCS2A02G372600	0.494705	-1.01536	7.64406e-06	5.62871e-05	down
TraesCS2A02G195600	4.61127	2.20516	1.09907e-17	2.39887e-16	up		TraesCS2A02G374400	0.177574	-2.49351	0.00789848	0.0295178	down
TraesCS2A02G196300	2.35319	1.23462	5.31154e-11	7.21952e-10	up		TraesCS2A02G378100	0.128991	-2.95466	0.00016088	0.000931834	down
TraesCS2A02G196400	7.77186	2.95826	5.13446e-08	5.11027e-07	up		TraesCS2A02G378300	0.115545	-3.11347	2.40269e-27	8.2557e-26	down
TraesCS2A02G196700	2.17478	1.12087	2.00364e-10	2.58865e-09	up		TraesCS2A02G381100	0.392422	-1.34952	2.17736e-25	6.84385e-24	down
TraesCS2A02G198500	2.11645	1.08165	1.02744e-32	4.36909e-31	up		TraesCS2A02G382400	0.304595	-1.71504	6.23777e-08	6.13811e-07	down
TraesCS2A02G198700	2.8655	1.51879	1.15876e-13	1.96086e-12	up		TraesCS2A02G384300	0.0237112	-5.39829	8.81439e-135	2.7366e-132	down
TraesCS2A02G199000	4.24361	2.08529	0.00227173	0.0100043	up		TraesCS2A02G389900	0.177393	-2.49498	3.07023e-127	8.89664e-125	down
TraesCS2A02G207500	13.7178	3.77798	4.91777e-229	3.93758e-226	up		TraesCS2A02G390000	0.123585	-3.01643	0.000379625	0.00202889	down
TraesCS2A02G211300	10.287	3.36275	6.90647e-05	0.000429375	up		TraesCS2A02G391000	0.395054	-1.33988	2.15996e-31	8.76251e-30	down
TraesCS2A02G217000	44.6312	5.47998	4.82431e-05	0.000309933	up		TraesCS2A02G400200	0.495843	-1.01205	0.00248049	0.0108056	down
TraesCS2A02G218700	6.11993	2.61351	5.35544e-103	1.05466e-100	up		TraesCS2A02G402900	0.417478	-1.26023	0.00129511	0.00610599	down
TraesCS2A02G218900	3.04958	1.60861	6.70596e-21	1.72765e-19	up		TraesCS2A02G405800	0.224466	-2.15543	0.00861016	0.0317658	down
TraesCS2A02G221300	3.38353	1.75853	0.00153583	0.00709202	up		TraesCS2A02G406900	0.101961	-3.29391	0	0	down
TraesCS2A02G238000	2.20401	1.14013	0.00194815	0.00874695	up		TraesCS2A02G407100	0.403327	-1.30998	1.15146e-07	1.0998e-06	down
TraesCS2A02G254200	2.02286	1.01639	2.99527e-54	2.36405e-52	up		TraesCS2A02G409000	0.227151	-2.13828	2.48379e-05	0.000168551	down
TraesCS2A02G256200	4.15649	2.05537	9.85957e-19	2.28214e-17	up		TraesCS2A02G411200	0.222147	-2.17041	6.65959e-32	2.74745e-30	down
TraesCS2A02G263800	2.20103	1.13818	2.60703e-07	2.38418e-06	up		TraesCS2A02G415900	0.0424483	-4.55815	0.0105166	0.037671	down
TraesCS2A02G266000	2.88802	1.53008	0.00289488	0.0123742	up		TraesCS2A02G416100	0.203273	-2.29851	5.81336e-08	5.74091e-07	down
TraesCS2A02G271300	69.794	6.12503	6.66849e-192	3.62313e-189	up		TraesCS2A02G424200	0.227755	-2.13444	3.08974e-12	4.67478e-11	down
TraesCS2A02G271700	13.2294	3.72567	0	0	up		TraesCS2A02G427100	0.0137637	-6.18298	2.83751e-26	9.28823e-25	down
TraesCS2A02G271800	2.39052	1.25732	0.00053385	0.00275912	up		TraesCS2A02G427200	0.0118987	-6.39306	2.17516e-06	1.74075e-05	down
TraesCS2A02G280800	3.23499	1.69376	2.15181e-17	4.59607e-16	up		TraesCS2A02G433500	0.192356	-2.37815	4.04655e-110	8.88956e-108	down
TraesCS2A02G281600	2.32714	1.21856	4.82634e-13	7.82553e-12	up		TraesCS2A02G438200	0.436958	-1.19443	1.66766e-07	1.56268e-06	down
TraesCS2A02G286700	7.63127	2.93192	8.08789e-73	9.44653e-71	up		TraesCS2A02G444600	0.246131	-2.0225	1.861e-18	4.23982e-17	down
TraesCS2A02G288800	3.49032	1.80336	1.63609e-15	3.13672e-14	up		TraesCS2A02G448900	0.210344	-2.24918	0.0129521	0.0450506	down
TraesCS2A02G289300	4.05009	2.01795	4.60455e-108	9.76292e-106	up		TraesCS2A02G449900	0.0877303	-3.51078	5.2009e-05	0.000332177	down
TraesCS2A02G292000	7.32976	2.87377	2.27092e-14	4.04537e-13	up		TraesCS2A02G453900	0.123737	-3.01465	0.00146144	0.00679177	down
TraesCS2A02G292800	2.22555	1.15416	1.60859e-17	3.46991e-16	up		TraesCS2A02G454000	0.139428	-2.84241	0.0103182	0.0370586	down
TraesCS2A02G298000	4.6125	2.20555	3.58028e-05	0.000235481	up		TraesCS2A02G458600	0.450233	-1.15126	0.000499264	0.00260002	down
TraesCS2A02G299400	6.16236	2.62348	4.90547e-41	2.71124e-39	up		TraesCS2A02G468200	0.00088598	-10.1404	1.85508e-17	3.98044e-16	down
TraesCS2A02G303100	2.72766	1.44766	9.44477e-08	9.10974e-07	up		TraesCS2A02G480300	0.409896	-1.28667	6.05126e-08	5.96519e-07	down
TraesCS2A02G304000	9.12117	3.18922	0.00693529	0.0264197	up		TraesCS2A02G482400	0.205662	-2.28166	0.00876065	0.0322448	down
TraesCS2A02G304200	2.59926	1.3781	2.39676e-10	3.07371e-09	up		TraesCS2A02G482700	0.485896	-1.04128	0.00155882	0.00718671	down
TraesCS2A02G305900	4.87702	2.286	2.0899e-05	0.000143538	up		TraesCS2A02G483400	0.0432295	-4.53184	0.00197039	0.00883646	down
TraesCS2A02G306100	2.24697	1.16798	1.29951e-20	3.30316e-19	up		TraesCS2A02G488500	0.02758	-5.18023	0.000993473	0.00482058	down
TraesCS2A02G306300	2.17392	1.1203	1.26411e-05	9.00742e-05	up		TraesCS2A02G493600	0.425608	-1.2324	1.83924e-48	1.24773e-46	down
TraesCS2A02G311100	2.24423	1.16622	2.37216e-10	3.04473e-09	up		TraesCS2A02G496200	0.358036	-1.48182	1.43322e-30	5.65226e-29	down
TraesCS2A02G311200	2.33237	1.2218	1.38526e-33	6.09954e-32	up		TraesCS2A02G499700	0.283386	-1.81916	1.04758e-09	1.26208e-08	down
TraesCS2A02G321600	2.26782	1.18131	5.04501e-09	5.64959e-08	up		TraesCS2A02G499800	0.206597	-2.27511	2.35308e-06	1.87372e-05	down
TraesCS2A02G323200	2.21564	1.14772	9.76968e-16	1.89998e-14	up		TraesCS2A02G502200	0.24018	-2.05781	1.31283e-07	1.24494e-06	down
TraesCS2A02G327600	2.81859	1.49497	6.9879e-57	5.84104e-55	up		TraesCS2A02G505300	0.242084	-2.04642	5.38153e-05	0.000342656	down
TraesCS2A02G342700	2.99534	1.58272	1.5403e-09	1.82782e-08	up		TraesCS2A02G505500	0.0972691	-3.36187	1.30683e-169	5.68023e-167	down
TraesCS2A02G343900	36.7995	5.20162	3.54509e-19	8.3712e-18	up		TraesCS2A02G507400	0.308707	-1.69569	2.05103e-40	1.1104e-38	down
TraesCS2A02G344500	2.20835	1.14297	0.00438334	0.0178144	up		TraesCS2A02G507500	0.192957	-2.37365	6.12379e-23	1.73808e-21	down
TraesCS2A02G345700	10.594	3.40517	6.10535e-11	8.25607e-10	up		TraesCS2A02G512000	0.162234	-2.62385	0.000880678	0.00432499	down
TraesCS2A02G348300	3.3345	1.73747	3.63061e-16	7.23649e-15	up		TraesCS2A02G513100	0.129475	-2.94925	0.00491287	0.0196786	down
TraesCS2A02G349100	3.05108	1.60932	2.55934e-30	9.99622e-29	up		TraesCS2A02G513200	0.182787	-2.45177	3.8806e-16	7.72211e-15	down
TraesCS2A02G350800	2.02849	1.02041	5.79875e-12	8.55846e-11	up		TraesCS2A02G513400	0.0271424	-5.20331	0.00114608	0.00547548	down
TraesCS2A02G352800	2.12576	1.08798	1.51508e-47	9.95636e-46	up		TraesCS2A02G514200	0.234723	-2.09097	7.09009e-41	3.89744e-39	down
TraesCS2A02G357400	2.55086	1.35098	1.26217e-09	1.51132e-08	up		TraesCS2A02G516300	0.255362	-1.96938	2.20474e-07	2.034e-06	down
TraesCS2A02G357500	3.22514	1.68936	0.000124918	0.000739805	up		TraesCS2A02G527100	0.0552888	-4.17687	1.5516e-12	2.40739e-11	down
TraesCS2A02G359400	2.3688	1.24416	0.0110766	0.0393826	up		TraesCS2A02G532700	0.264617	-1.91802	0.00724833	0.0274496	down
TraesCS2A02G365000	2.10477	1.07366	3.02432e-18	6.82879e-17	up		TraesCS2A02G534300	0.234327	-2.09341	0.000130263	0.000768545	down
TraesCS2A02G376400	366.049	8.51589	4.67946e-12	6.97586e-11	up		TraesCS2A02G539400	0.155604	-2.68405	1.71114e-37	8.49316e-36	down
TraesCS2A02G377200	2.82768	1.49962	3.18212e-43	1.88364e-41	up		TraesCS2A02G539500	0.411531	-1.28093	1.32465e-22	3.68239e-21	down
TraesCS2A02G378200	2.05913	1.04204	0.000451026	0.00237257	up		TraesCS2A02G543800	0.390795	-1.35552	3.25889e-07	2.93923e-06	down
TraesCS2A02G380800	5.25494	2.39368	2.87798e-06	2.25859e-05	up		TraesCS2A02G559400	0.356203	-1.48923	0.00621753	0.0240978	down
TraesCS2A02G380900	3.79191	1.92292	1.12507e-07	1.07612e-06	up		TraesCS2A02G563400	0.260189	-1.94237	0.013258	0.045884	down
TraesCS2A02G381900	2.21217	1.14546	2.895e-19	6.87614e-18	up		TraesCS2A02G564000	0.213261	-2.22931	0.000519476	0.0026926	down
TraesCS2A02G394700	2.44154	1.28779	0.000106833	0.000640557	up		TraesCS2A02G571900	0.384547	-1.37877	2.04159e-06	1.64093e-05	down
TraesCS2A02G394900	25.3444	4.6636	9.96818e-15	1.82048e-13	up		TraesCS2A02G578400	0.0341541	-4.8718	5.58016e-09	6.21229e-08	down
TraesCS2A02G395000	4.57391	2.19343	4.17223e-32	1.7354e-30	up		TraesCS2A02G583400	0.43139	-1.21293	7.1233e-23	2.00958e-21	down
TraesCS2A02G395400	2.55798	1.355	1.00465e-37	5.01107e-36	up		TraesCS2A02G586500	0.415752	-1.26621	7.50109e-12	1.09633e-10	down
TraesCS2A02G396900	2.30387	1.20406	1.55115e-05	0.000108908	up		TraesCS2A02G587000	0.159663	-2.6469	0.00304923	0.0129494	down
TraesCS2A02G399200	11.1557	3.47971	1.82044e-271	2.26076e-268	up		TraesCS2A02G590800	0.442084	-1.17761	0.000716227	0.00358833	down
TraesCS2A02G399300	4.29432	2.10243	1.25836e-08	1.34364e-07	up		TraesCS2B02G010100	0.339734	-1.55752	1.34651e-06	1.11112e-05	down
TraesCS2A02G399600	2.43998	1.28687	0.00726886	0.0275098	up		TraesCS2B02G017800	0.352497	-1.50432	0.000225956	0.00126587	down
TraesCS2A02G399900	4.58997	2.19848	1.02353e-85	1.50809e-83	up		TraesCS2B02G040000	0.311726	-1.68165	1.80354e-22	4.99086e-21	down
TraesCS2A02G400300	3.10587	1.635	7.30271e-32	3.01074e-30	up		TraesCS2B02G042900	0.123855	-3.01328	0.00532628	0.0210957	down
TraesCS2A02G401000	5.27043	2.39792	1.66089e-43	9.89897e-42	up		TraesCS2B02G044400	0.162659	-2.62007	4.52573e-126	1.275e-123	down
TraesCS2A02G409400	3.20457	1.68013	2.83281e-05	0.000190162	up		TraesCS2B02G047900	0.485418	-1.0427	0.000126627	0.000749268	down
TraesCS2A02G416900	3.04531	1.60659	2.63505e-41	1.46437e-39	up		TraesCS2B02G049000	0.129318	-2.951	0.0142582	0.0487794	down
TraesCS2A02G419200	4.31974	2.11095	2.53613e-15	4.81223e-14	up		TraesCS2B02G051700	0.413692	-1.27337	1.93598e-06	1.56245e-05	down
TraesCS2A02G421500	12.1307	3.6006	1.92938e-12	2.96782e-11	up		TraesCS2B02G059500	0.411704	-1.28032	5.9232e-10	7.32301e-09	down
TraesCS2A02G421800	30.8655	4.94792	0.00220996	0.009774	up		TraesCS2B02G066000	0.207817	-2.26661	2.14994e-06	1.72324e-05	down
TraesCS2A02G422100	6.23375	2.6401	0.000589888	0.00301469	up		TraesCS2B02G070800	0.396004	-1.33641	0.000996673	0.0048334	down
TraesCS2A02G424800	8.19936	3.03551	0.000112416	0.000671517	up		TraesCS2B02G079700	0.317582	-1.6548	2.63553e-05	0.00017796	down
TraesCS2A02G424861	12.3299	3.62409	2.72543e-25	8.51812e-24	up		TraesCS2B02G080300	0.226809	-2.14045	0.0128718	0.0448199	down
TraesCS2A02G425600	32.1395	5.00628	0.00329643	0.0138791	up		TraesCS2B02G096300	0.393845	-1.3443	0.0111664	0.0396463	down
TraesCS2A02G428400	2.72314	1.44527	2.61031e-27	8.95392e-26	up		TraesCS2B02G101800	0.484322	-1.04596	2.29699e-09	2.68182e-08	down
TraesCS2A02G430900	2.39624	1.26077	6.40963e-06	4.78751e-05	up		TraesCS2B02G102900	0.098516	-3.3435	7.39688e-11	9.93411e-10	down
TraesCS2A02G431100	2.19023	1.13109	5.8543e-10	7.24961e-09	up		TraesCS2B02G103600	0.201567	-2.31067	4.77749e-09	5.35889e-08	down
TraesCS2A02G431900	2.03193	1.02285	2.1633e-08	2.24413e-07	up		TraesCS2B02G109700	0.434997	-1.20092	3.68476e-05	0.00024183	down
TraesCS2A02G432800	7.0049	2.80836	7.47723e-46	4.72978e-44	up		TraesCS2B02G109800	0.494999	-1.0145	3.80314e-08	3.84433e-07	down
TraesCS2A02G437200	3.17621	1.6673	5.69506e-47	3.70648e-45	up		TraesCS2B02G110600	0.124748	-3.00291	5.38781e-06	4.06723e-05	down
TraesCS2A02G438300	6.34047	2.66459	4.39044e-20	1.0856e-18	up		TraesCS2B02G114500	0.3613	-1.46873	2.09376e-07	1.93691e-06	down
TraesCS2A02G443600	45.5165	5.50832	1.10492e-19	2.68196e-18	up		TraesCS2B02G119500	0.374047	-1.41871	0.0140692	0.0482359	down
TraesCS2A02G445500	6.28955	2.65296	0.00874469	0.0321977	up		TraesCS2B02G121600	0.267421	-1.90281	6.46645e-92	1.0722e-89	down
TraesCS2A02G446300	3.06513	1.61595	0.00547084	0.0215882	up		TraesCS2B02G131400	0.378576	-1.40134	1.00907e-08	1.0891e-07	down
TraesCS2A02G447800	2.60852	1.38323	6.59243e-31	2.63576e-29	up		TraesCS2B02G133700	0.0710315	-3.8154	1.84028e-09	2.16395e-08	down
TraesCS2A02G450500	2.4276	1.27953	9.98525e-60	8.94878e-58	up		TraesCS2B02G135600	0.00858044	-6.86473	6.61218e-20	1.62178e-18	down
TraesCS2A02G453300	8.94109	3.16045	7.96997e-66	8.00311e-64	up		TraesCS2B02G137800	0.172973	-2.53138	1.02185e-08	1.10252e-07	down
TraesCS2A02G454500	2.02874	1.02058	0.00205652	0.00918079	up		TraesCS2B02G137900	0.196676	-2.34611	1.09596e-24	3.35133e-23	down
TraesCS2A02G456100	2.39719	1.26134	9.98488e-49	6.83464e-47	up		TraesCS2B02G147600	0.337896	-1.56535	0.0039413	0.0162499	down
TraesCS2A02G460600	4.14765	2.05229	1.09555e-05	7.89138e-05	up		TraesCS2B02G150600	0.102975	-3.27964	1.54014e-35	7.19267e-34	down
TraesCS2A02G461800	5.95311	2.57364	7.58531e-12	1.10771e-10	up		TraesCS2B02G152100	0.0781207	-3.67815	0.000788616	0.00391298	down
TraesCS2A02G462700	3.52666	1.8183	1.94473e-54	1.5429e-52	up		TraesCS2B02G160100	0.135719	-2.8813	3.34811e-07	3.01568e-06	down
TraesCS2A02G464600	5.87898	2.55556	1.46131e-06	1.20054e-05	up		TraesCS2B02G163300	0.395921	-1.33671	2.19948e-07	2.03007e-06	down
TraesCS2A02G464900	2.1087	1.07636	5.61746e-08	5.55827e-07	up		TraesCS2B02G167500	0.339111	-1.56017	1.24906e-07	1.18688e-06	down
TraesCS2A02G467300	6.87084	2.78049	0	0	up		TraesCS2B02G168400	0.277366	-1.85014	2.19175e-11	3.0738e-10	down
TraesCS2A02G479100	2.07241	1.05131	1.99533e-05	0.000137477	up		TraesCS2B02G170900	0.255104	-1.97084	0.00281266	0.0120677	down
TraesCS2A02G481400	3.32633	1.73393	1.43597e-31	5.85667e-30	up		TraesCS2B02G171400	0.236903	-2.07763	7.3486e-21	1.88762e-19	down
TraesCS2A02G483600	26.2987	4.71692	0.00693532	0.0264197	up		TraesCS2B02G174500	0.216778	-2.20571	5.55554e-27	1.87606e-25	down
TraesCS2A02G484200	72.0473	6.17087	9.61405e-06	6.98799e-05	up		TraesCS2B02G177300	0.481949	-1.05305	3.88838e-38	1.96362e-36	down
TraesCS2A02G485100	10.5056	3.39308	8.43391e-28	2.97175e-26	up		TraesCS2B02G177500	0.396713	-1.33383	4.62155e-85	6.74414e-83	down
TraesCS2A02G485600	13.1768	3.71993	5.43066e-12	8.04055e-11	up		TraesCS2B02G177600	0.424622	-1.23575	5.24321e-13	8.46987e-12	down
TraesCS2A02G488900	3.03484	1.60162	7.58085e-13	1.20983e-11	up		TraesCS2B02G178400	0.395642	-1.33773	0.00399448	0.0164338	down
TraesCS2A02G489500	2.84099	1.5064	6.08664e-13	9.783e-12	up		TraesCS2B02G182900	0.0891116	-3.48824	8.12626e-89	1.27778e-86	down
TraesCS2A02G492300	2.0338	1.02417	8.43255e-07	7.17645e-06	up		TraesCS2B02G183100	0.329268	-1.60267	4.43985e-11	6.07815e-10	down
TraesCS2A02G493400	19.0145	4.24903	9.68141e-16	1.88402e-14	up		TraesCS2B02G186900	0.152843	-2.70988	0.00877067	0.0322778	down
TraesCS2A02G493500	80.3551	6.32832	6.7062e-06	4.99432e-05	up		TraesCS2B02G189100	0.353136	-1.5017	4.95446e-05	0.000317624	down
TraesCS2A02G504100	2.38776	1.25566	5.90956e-05	0.000373426	up		TraesCS2B02G191500	0.0237817	-5.394	4.04837e-26	1.3188e-24	down
TraesCS2A02G504800	4.0879	2.03136	0.00654508	0.0251488	up		TraesCS2B02G192700	0.403648	-1.30883	7.46002e-11	1.00123e-09	down
TraesCS2A02G505200	2.62124	1.39025	1.08202e-05	7.80503e-05	up		TraesCS2B02G193600	0.498565	-1.00415	0.000534092	0.00276013	down
TraesCS2A02G506500	2.05677	1.04038	7.1981e-23	2.02974e-21	up		TraesCS2B02G194200	0.240352	-2.05678	0.000312412	0.00169755	down
TraesCS2A02G510400	2.4952	1.31915	3.52977e-38	1.78697e-36	up		TraesCS2B02G195900	0.368674	-1.43958	1.30809e-24	3.98596e-23	down
TraesCS2A02G510700	23.3493	4.54531	1.21996e-168	5.26505e-166	up		TraesCS2B02G199600	0.135415	-2.88454	0.00665842	0.0255182	down
TraesCS2A02G510800	26.8082	4.7446	0	0	up		TraesCS2B02G204300	0.2407	-2.05469	1.03547e-09	1.24872e-08	down
TraesCS2A02G522100	10.7896	3.43157	1.67612e-09	1.98032e-08	up		TraesCS2B02G209900	0.128013	-2.96563	0.0132461	0.0458505	down
TraesCS2A02G527600	2.22535	1.15404	1.73111e-13	2.89798e-12	up		TraesCS2B02G212400	0.00581027	-7.42718	1.35227e-09	1.61476e-08	down
TraesCS2A02G528700	2.1059	1.07444	8.86787e-05	0.000539736	up		TraesCS2B02G218600	0.497489	-1.00726	5.2489e-38	2.63972e-36	down
TraesCS2A02G531800	331.401	8.37243	1.25063e-11	1.79447e-10	up		TraesCS2B02G220100	0.444013	-1.17133	2.55729e-37	1.26312e-35	down
TraesCS2A02G532000	46.065	5.5256	3.48721e-05	0.000229832	up		TraesCS2B02G228900	0.164299	-2.60561	6.32912e-39	3.28337e-37	down
TraesCS2A02G532200	44.7201	5.48285	1.68843e-26	5.59914e-25	up		TraesCS2B02G229900	0.269631	-1.89094	4.67474e-13	7.59389e-12	down
TraesCS2A02G532400	63.0605	5.97866	2.52159e-05	0.000170851	up		TraesCS2B02G245100	0.276979	-1.85215	0.000380194	0.0020315	down
TraesCS2A02G534400	3.84228	1.94196	2.21251e-09	2.58567e-08	up		TraesCS2B02G247100	0.258208	-1.9534	0.000186491	0.00106507	down
TraesCS2A02G535900	5.27073	2.398	9.31307e-08	8.99411e-07	up		TraesCS2B02G260800	0.157528	-2.66632	0.0131895	0.0456781	down
TraesCS2A02G538600	4.69255	2.23037	6.41751e-14	1.10943e-12	up		TraesCS2B02G263100	0.154735	-2.69213	0.000107143	0.000642223	down
TraesCS2A02G539000	2.63474	1.39766	5.34341e-10	6.64671e-09	up		TraesCS2B02G271500	0.45762	-1.12778	0.00131762	0.00619873	down
TraesCS2A02G539100	3.45803	1.78995	1.40273e-39	7.42897e-38	up		TraesCS2B02G272700	0.436687	-1.19533	0.0111297	0.039546	down
TraesCS2A02G540600	6.41102	2.68055	0.00554766	0.0218571	up		TraesCS2B02G275100	0.104268	-3.26163	0	0	down
TraesCS2A02G542600	2.43002	1.28097	0.00273876	0.0117837	up		TraesCS2B02G275500	0.355495	-1.4921	3.08237e-09	3.54773e-08	down
TraesCS2A02G544700	3.91315	1.96833	1.17876e-05	8.44778e-05	up		TraesCS2B02G277300	0.128282	-2.9626	1.36255e-31	5.56845e-30	down
TraesCS2A02G545100	2.24286	1.16534	0.00653014	0.0251028	up		TraesCS2B02G277600	0.477113	-1.0676	0.00855064	0.0315832	down
TraesCS2A02G546500	2.64743	1.40459	4.17669e-10	5.24149e-09	up		TraesCS2B02G284400	0.0927578	-3.43039	1.83368e-67	1.9009e-65	down
TraesCS2A02G547500	5.61792	2.49004	0.000124693	0.00073876	up		TraesCS2B02G287500	0.394922	-1.34036	1.29921e-61	1.19787e-59	down
TraesCS2A02G548100	3.2828	1.71493	5.6526e-09	6.28489e-08	up		TraesCS2B02G300600	0.183919	-2.44286	0.00736514	0.0278116	down
TraesCS2A02G551100	2.16327	1.11321	7.42345e-12	1.08589e-10	up		TraesCS2B02G301600	0.229955	-2.12057	0.000749883	0.0037397	down
TraesCS2A02G562100	2.45515	1.29581	5.59193e-09	6.22312e-08	up		TraesCS2B02G311200	0.489134	-1.0317	4.17791e-12	6.25268e-11	down
TraesCS2A02G564700	3.47332	1.79632	1.88599e-05	0.000130402	up		TraesCS2B02G312400	0.48981	-1.0297	1.94282e-09	2.27837e-08	down
TraesCS2A02G571000	5.15407	2.36571	3.03988e-11	4.21373e-10	up		TraesCS2B02G317500	0.113419	-3.14027	1.53971e-124	4.27829e-122	down
TraesCS2A02G573900	23.2021	4.53618	0.000172573	0.000993133	up		TraesCS2B02G317600	0.128465	-2.96055	2.53461e-40	1.36734e-38	down
TraesCS2A02G582100	25.3536	4.66412	0.00786763	0.0294188	up		TraesCS2B02G324200	0.367268	-1.4451	6.13812e-05	0.000386503	down
TraesCS2A02G582400	3.4571	1.78956	0.00844459	0.0312592	up		TraesCS2B02G329800	0.274047	-1.8675	0.000306928	0.00167029	down
TraesCS2A02G583700	2.81073	1.49094	8.08503e-28	2.85377e-26	up		TraesCS2B02G332200	0.429638	-1.21881	0.000204248	0.00115629	down
TraesCS2A02G584328	9.28631	3.21511	2.5133e-05	0.000170406	up		TraesCS2B02G333900	0.328449	-1.60626	5.77663e-33	2.47201e-31	down
TraesCS2A02G587900	4.14618	2.05178	5.68882e-29	2.09296e-27	up		TraesCS2B02G335500	0.312341	-1.67881	6.0446e-05	0.000381127	down
TraesCS2B02G004500	7.47433	2.90194	6.77218e-06	5.04037e-05	up		TraesCS2B02G338600	0.131418	-2.92777	0.00115069	0.00549363	down
TraesCS2B02G005500	2.06195	1.04401	0.00547038	0.0215882	up		TraesCS2B02G338700	0.428808	-1.2216	2.65133e-07	2.42251e-06	down
TraesCS2B02G006300	73.8668	6.20685	2.75471e-12	4.18446e-11	up		TraesCS2B02G345000	0.243826	-2.03608	0.000863725	0.00425436	down
TraesCS2B02G006700	20.4455	4.35371	5.83871e-07	5.08076e-06	up		TraesCS2B02G351100	0.373309	-1.42156	0.000574907	0.00294803	down
TraesCS2B02G006800	30.5443	4.93283	3.75496e-05	0.000246066	up		TraesCS2B02G354100	0.341358	-1.55064	0.00687419	0.0262131	down
TraesCS2B02G007400	3.68218	1.88056	0.00754095	0.0283646	up		TraesCS2B02G355900	0.343275	-1.54256	9.47131e-59	8.34079e-57	down
TraesCS2B02G008100	2.68907	1.42711	0.00829485	0.0307836	up		TraesCS2B02G356100	0.237988	-2.07104	1.91583e-90	3.10885e-88	down
TraesCS2B02G009200	21.7948	4.44591	0.0115769	0.0409175	up		TraesCS2B02G359000	0.344136	-1.53895	0.000427835	0.00226054	down
TraesCS2B02G010500	4.42765	2.14654	1.77272e-17	3.81044e-16	up		TraesCS2B02G363800	0.499409	-1.00171	2.36417e-11	3.30343e-10	down
TraesCS2B02G012000	3.20893	1.68209	3.92098e-08	3.95884e-07	up		TraesCS2B02G367200	0.267859	-1.90046	2.45127e-25	7.67703e-24	down
TraesCS2B02G018600	2.34679	1.23069	3.04933e-49	2.12066e-47	up		TraesCS2B02G370900	0.0997601	-3.32539	2.55435e-15	4.84531e-14	down
TraesCS2B02G023800	2.12399	1.08678	4.06988e-13	6.63612e-12	up		TraesCS2B02G374300	0.162579	-2.62079	0.0105486	0.0377615	down
TraesCS2B02G024200	2.88417	1.52816	0.000359549	0.00192979	up		TraesCS2B02G374600	0.232984	-2.1017	1.21183e-14	2.20259e-13	down
TraesCS2B02G027000	4.42924	2.14706	1.01494e-16	2.08653e-15	up		TraesCS2B02G377500	0.415905	-1.26568	1.04189e-15	2.02237e-14	down
TraesCS2B02G030600	2.97798	1.57434	3.84071e-05	0.000251306	up		TraesCS2B02G385200	0.0760961	-3.71603	0.0122674	0.0429819	down
TraesCS2B02G031100	267.438	8.06306	8.66423e-11	1.15622e-09	up		TraesCS2B02G386700	0.45567	-1.13394	0.000403737	0.00214457	down
TraesCS2B02G031200	14.105	3.81814	0.00515445	0.0204979	up		TraesCS2B02G388600	0.0572259	-4.12719	6.28004e-05	0.000394542	down
TraesCS2B02G032000	99.8944	6.64233	5.58195e-07	4.86429e-06	up		TraesCS2B02G389500	0.201416	-2.31175	2.17704e-26	7.1648e-25	down
TraesCS2B02G032500	146.953	7.19921	2.1251e-08	2.20602e-07	up		TraesCS2B02G392000	0.0701528	-3.83335	0.000320853	0.00173892	down
TraesCS2B02G032600	38.7368	5.27563	0.000651903	0.00329728	up		TraesCS2B02G395000	0.122375	-3.03062	6.4542e-112	1.45463e-109	down
TraesCS2B02G032900	78.0558	6.28643	4.09263e-06	3.1453e-05	up		TraesCS2B02G395200	0.193208	-2.37177	5.33525e-07	4.66533e-06	down
TraesCS2B02G033300	4.87126	2.2843	2.60086e-05	0.000175775	up		TraesCS2B02G397300	0.410812	-1.28345	1.10489e-06	9.24571e-06	down
TraesCS2B02G034200	3.06026	1.61365	0.000132472	0.000779762	up		TraesCS2B02G401500	0.00193407	-9.01415	4.49144e-35	2.06899e-33	down
TraesCS2B02G034600	4.8355	2.27366	1.26967e-11	1.82136e-10	up		TraesCS2B02G405300	0.389812	-1.35915	0.00155724	0.00718049	down
TraesCS2B02G035400	39.7609	5.31328	0.000655931	0.0033149	up		TraesCS2B02G407100	0.403896	-1.30794	0.00515215	0.0204901	down
TraesCS2B02G038700	4.30848	2.10718	0.0131057	0.0454835	up		TraesCS2B02G409300	0.155056	-2.68914	6.41863e-69	6.9253e-67	down
TraesCS2B02G040500	7.60483	2.92692	1.73658e-08	1.82166e-07	up		TraesCS2B02G410200	0.454823	-1.13662	0.00012139	0.000720735	down
TraesCS2B02G040600	5.95141	2.57323	2.40143e-31	9.71622e-30	up		TraesCS2B02G413100	0.0228839	-5.44953	5.4348e-05	0.000345759	down
TraesCS2B02G040700	7.82624	2.96832	0.0135214	0.0466547	up		TraesCS2B02G420100	0.38508	-1.37677	0.000744717	0.00371821	down
TraesCS2B02G041900	5.33393	2.4152	0.0143664	0.0490998	up		TraesCS2B02G422200	0.430216	-1.21687	0.0117497	0.0414369	down
TraesCS2B02G042600	2.75658	1.46288	5.57411e-12	8.24291e-11	up		TraesCS2B02G424500	0.12637	-2.98427	1.24046e-151	4.44026e-149	down
TraesCS2B02G043600	5.5094	2.4619	1.38465e-76	1.71607e-74	up		TraesCS2B02G426500	0.373157	-1.42215	6.21566e-51	4.5028e-49	down
TraesCS2B02G043700	5.11082	2.35355	4.5158e-49	3.11207e-47	up		TraesCS2B02G428500	0.322443	-1.63288	3.71104e-100	7.05701e-98	down
TraesCS2B02G044000	2.51192	1.32879	5.46663e-05	0.000347457	up		TraesCS2B02G430000	0.289771	-1.78701	1.75256e-57	1.4812e-55	down
TraesCS2B02G045500	6.99544	2.80642	7.33826e-05	0.000454086	up		TraesCS2B02G433600	0.385275	-1.37604	0.00754074	0.0283646	down
TraesCS2B02G045600	2.74985	1.45935	2.54485e-23	7.34625e-22	up		TraesCS2B02G434100	0.0468577	-4.41557	0.0029443	0.0125625	down
TraesCS2B02G045800	5.77092	2.5288	4.57833e-07	4.04355e-06	up		TraesCS2B02G438200	0.477017	-1.06789	0.00847116	0.0313385	down
TraesCS2B02G058000	2.21762	1.14901	1.82245e-10	2.36359e-09	up		TraesCS2B02G447500	0.0303376	-5.04275	7.07412e-12	1.03729e-10	down
TraesCS2B02G058200	3.5487	1.82729	8.46424e-40	4.51021e-38	up		TraesCS2B02G447600	0.00524068	-7.57603	5.921e-10	7.32178e-09	down
TraesCS2B02G062500	4.69501	2.23113	3.03138e-58	2.61653e-56	up		TraesCS2B02G451100	0.411451	-1.28121	0.00438405	0.0178161	down
TraesCS2B02G067000	2.24658	1.16773	7.73927e-31	3.08415e-29	up		TraesCS2B02G454500	0.012181	-6.35923	7.68544e-99	1.4302e-96	down
TraesCS2B02G073100	7.20527	2.84905	8.31907e-10	1.01328e-08	up		TraesCS2B02G456700	0.183323	-2.44754	0.00108222	0.00520143	down
TraesCS2B02G077100	2.34019	1.22663	1.97769e-19	4.74553e-18	up		TraesCS2B02G457600	0.384798	-1.37783	0.000263048	0.00145241	down
TraesCS2B02G078600	9.47763	3.24453	0.000118239	0.000703539	up		TraesCS2B02G462500	0.191655	-2.38341	0.0137745	0.0473992	down
TraesCS2B02G078700	4.05169	2.01853	1.26146e-10	1.65686e-09	up		TraesCS2B02G462600	0.037013	-4.75582	0.00410012	0.0168048	down
TraesCS2B02G084300	28.5923	4.83756	0.00400972	0.0164865	up		TraesCS2B02G468800	0.104792	-3.25439	0.00573136	0.0224661	down
TraesCS2B02G085000	3.17487	1.6667	8.12665e-16	1.58704e-14	up		TraesCS2B02G469000	0.453003	-1.14241	8.09929e-19	1.88618e-17	down
TraesCS2B02G086300	8.45509	3.07982	3.00553e-05	0.000200562	up		TraesCS2B02G469500	0.218901	-2.19165	0.00854337	0.0315673	down
TraesCS2B02G086900	2.12751	1.08917	9.72784e-05	0.000587377	up		TraesCS2B02G470100	0.236612	-2.0794	1.61476e-05	0.000112931	down
TraesCS2B02G093100	4.49283	2.16762	3.06966e-45	1.91388e-43	up		TraesCS2B02G471800	0.470145	-1.08882	5.67536e-20	1.39934e-18	down
TraesCS2B02G094300	2.53946	1.34452	1.21467e-15	2.34576e-14	up		TraesCS2B02G474200	0.0335712	-4.89663	0.00499897	0.0199775	down
TraesCS2B02G095900	22.374	4.48375	1.37452e-67	1.42978e-65	up		TraesCS2B02G475400	0.0353023	-4.82409	0.0034198	0.0143307	down
TraesCS2B02G097800	4.86337	2.28196	0.000279815	0.00153646	up		TraesCS2B02G475600	0.0602105	-4.05384	0.000140863	0.000824448	down
TraesCS2B02G110300	9.29423	3.21634	2.78072e-29	1.03747e-27	up		TraesCS2B02G475700	0.243979	-2.03517	1.64964e-05	0.000115185	down
TraesCS2B02G111900	8.70181	3.12132	0.0112483	0.0399044	up		TraesCS2B02G475900	0.0962185	-3.37754	0.000220645	0.0012392	down
TraesCS2B02G117400	3.07467	1.62043	9.38078e-29	3.4264e-27	up		TraesCS2B02G477100	0.0598674	-4.06209	0.0123868	0.0433494	down
TraesCS2B02G118400	5.18095	2.37322	2.04166e-17	4.37e-16	up		TraesCS2B02G478900	0.386478	-1.37154	1.43466e-06	1.17992e-05	down
TraesCS2B02G118500	3.67154	1.87638	4.92562e-98	9.02812e-96	up		TraesCS2B02G483000	0.277052	-1.85177	1.6116e-09	1.90908e-08	down
TraesCS2B02G121900	8.28634	3.05074	3.67672e-15	6.90969e-14	up		TraesCS2B02G489900	0.481429	-1.0546	1.30193e-05	9.25524e-05	down
TraesCS2B02G124100	2.46965	1.3043	4.76595e-16	9.42227e-15	up		TraesCS2B02G490400	0.251987	-1.98858	5.34271e-05	0.000340577	down
TraesCS2B02G125800	34.5166	5.10922	0.00136396	0.00638901	up		TraesCS2B02G491000	0.0978111	-3.35386	0	0	down
TraesCS2B02G127600	4.27683	2.09654	0.000284422	0.00155911	up		TraesCS2B02G491100	0.0146568	-6.09229	2.53105e-06	2.00494e-05	down
TraesCS2B02G127800	25.7439	4.68616	1.65059e-06	1.34586e-05	up		TraesCS2B02G509200	0.192118	-2.37993	1.68857e-05	0.000117701	down
TraesCS2B02G129600	8.19398	3.03457	1.85664e-25	5.85086e-24	up		TraesCS2B02G509700	0.00154366	-9.33943	8.48612e-15	1.55588e-13	down
TraesCS2B02G133600	2.12718	1.08895	6.1121e-05	0.000385064	up		TraesCS2B02G513000	0.320079	-1.6435	0.0131961	0.045697	down
TraesCS2B02G144900	134.159	7.0678	6.06282e-08	5.97368e-07	up		TraesCS2B02G516300	0.0952587	-3.39201	0.00300804	0.0127869	down
TraesCS2B02G145900	2.36093	1.23935	0.00963847	0.0349639	up		TraesCS2B02G519800	0.215543	-2.21395	0.0142027	0.0486145	down
TraesCS2B02G151600	3.12817	1.64532	0.000251023	0.00139119	up		TraesCS2B02G521600	0.318381	-1.65117	2.45707e-105	4.96736e-103	down
TraesCS2B02G153900	2.91323	1.54262	0.0047511	0.0191302	up		TraesCS2B02G524500	0.287073	-1.80051	2.50578e-14	4.45072e-13	down
TraesCS2B02G160400	82.7346	6.37042	4.91001e-71	5.49235e-69	up		TraesCS2B02G527800	0.0332268	-4.91151	0.000620104	0.0031546	down
TraesCS2B02G161700	16.7763	4.06835	7.45437e-05	0.000460615	up		TraesCS2B02G530300	0.371561	-1.42833	7.12606e-08	6.97836e-07	down
TraesCS2B02G170600	3.13659	1.6492	9.37537e-07	7.92375e-06	up		TraesCS2B02G535400	0.330852	-1.59574	5.15407e-07	4.5199e-06	down
TraesCS2B02G171200	15.5964	3.96314	7.07533e-29	2.59366e-27	up		TraesCS2B02G535500	0.343597	-1.54121	3.16747e-06	2.47143e-05	down
TraesCS2B02G175300	2.29936	1.20123	3.40173e-32	1.42269e-30	up		TraesCS2B02G536600	0.388901	-1.36253	0.00200293	0.00896719	down
TraesCS2B02G184400	8.34012	3.06007	4.45089e-08	4.46645e-07	up		TraesCS2B02G541300	0.0436256	-4.51868	0.00962413	0.0349182	down
TraesCS2B02G184500	2.10539	1.07409	4.48217e-05	0.000289481	up		TraesCS2B02G542000	0.0168415	-5.89183	4.28336e-05	0.000277879	down
TraesCS2B02G187300	2.32891	1.21965	2.37266e-65	2.37079e-63	up		TraesCS2B02G542400	0.245824	-2.0243	9.89818e-13	1.56123e-11	down
TraesCS2B02G188800	2.06941	1.04922	1.32368e-34	6.0066e-33	up		TraesCS2B02G543400	0.16466	-2.60244	0.00745296	0.0280891	down
TraesCS2B02G192000	2.68936	1.42726	2.22248e-19	5.32031e-18	up		TraesCS2B02G545500	0.0610094	-4.03483	0.0111101	0.0394875	down
TraesCS2B02G193500	2.38306	1.25282	7.0097e-11	9.43287e-10	up		TraesCS2B02G545700	0.440217	-1.18371	0.000127968	0.00075625	down
TraesCS2B02G195600	3.57246	1.83692	8.49799e-175	3.7746e-172	up		TraesCS2B02G552800	0.130579	-2.93701	0.000243355	0.00135251	down
TraesCS2B02G196400	2.71641	1.4417	0.00727167	0.0275184	up		TraesCS2B02G555100	0.14007	-2.83579	1.4306e-13	2.40683e-12	down
TraesCS2B02G196700	2.07489	1.05304	4.35858e-05	0.000282068	up		TraesCS2B02G557700	0.0193361	-5.69256	2.93471e-07	2.66502e-06	down
TraesCS2B02G202000	3.14177	1.65158	1.93075e-10	2.49766e-09	up		TraesCS2B02G568900	0.0611839	-4.03071	1.00845e-13	1.71318e-12	down
TraesCS2B02G203100	36.6032	5.1939	0.000797085	0.00395018	up		TraesCS2B02G587800	0.214706	-2.21956	0.000441908	0.00232964	down
TraesCS2B02G206900	2.59857	1.37772	1.40391e-08	1.49198e-07	up		TraesCS2B02G591000	0.386103	-1.37294	8.33856e-30	3.19131e-28	down
TraesCS2B02G209100	3.01521	1.59226	4.14123e-92	6.8853e-90	up		TraesCS2B02G596400	0.454189	-1.13864	0.00179126	0.00811808	down
TraesCS2B02G209200	2.06363	1.04518	3.05705e-09	3.52192e-08	up		TraesCS2B02G600300	0.348563	-1.52051	0.0115584	0.0408664	down
TraesCS2B02G210600	2.2331	1.15905	0.00180523	0.00817534	up		TraesCS2B02G605800	0.130525	-2.93761	8.65385e-213	6.05292e-210	down
TraesCS2B02G210900	6.73765	2.75225	1.04956e-25	3.34387e-24	up		TraesCS2B02G612100	0.29596	-1.75652	4.6084e-38	2.32337e-36	down
TraesCS2B02G213500	2.7707	1.47025	3.00975e-19	7.14033e-18	up		TraesCS2B02G615500	0.33355	-1.58402	0.00433082	0.0176339	down
TraesCS2B02G216800	3.31352	1.72837	8.94954e-16	1.74439e-14	up		TraesCS2B02G622500	0.416235	-1.26453	0.00501465	0.0200323	down
TraesCS2B02G218900	2.11406	1.08001	1.42225e-12	2.2129e-11	up		TraesCS2B02G626100	0.128125	-2.96438	1.33298e-07	1.26268e-06	down
TraesCS2B02G219300	3.08032	1.62308	2.05108e-09	2.40254e-08	up		TraesCS2B02G626600	0.113762	-3.13592	0.00028573	0.00156557	down
TraesCS2B02G219500	8.24538	3.04359	2.25112e-15	4.28748e-14	up		TraesCS2D02G000100	0.33679	-1.57008	0.00206162	0.00920221	down
TraesCS2B02G224300	2.00468	1.00337	3.49227e-08	3.54245e-07	up		TraesCS2D02G005100	0.240839	-2.05386	3.32911e-27	1.13747e-25	down
TraesCS2B02G226000	2.20819	1.14286	8.14033e-09	8.86622e-08	up		TraesCS2D02G009100	0.297764	-1.74776	7.92063e-07	6.77137e-06	down
TraesCS2B02G226100	2.74882	1.45881	1.16735e-11	1.67735e-10	up		TraesCS2D02G012100	0.294513	-1.7636	4.82136e-07	4.24629e-06	down
TraesCS2B02G227000	2.38242	1.25243	2.7394e-54	2.16491e-52	up		TraesCS2D02G013100	0.134771	-2.89142	4.47106e-07	3.9557e-06	down
TraesCS2B02G232000	2.31527	1.21118	4.24025e-28	1.50805e-26	up		TraesCS2D02G015500	0.430066	-1.21737	0.000140198	0.000820791	down
TraesCS2B02G233000	2.22516	1.15391	0.00284241	0.0121765	up		TraesCS2D02G018200	0.445717	-1.1658	1.72858e-07	1.61529e-06	down
TraesCS2B02G234300	14.9365	3.90077	1.76349e-47	1.15762e-45	up		TraesCS2D02G021300	0.314776	-1.6676	2.94391e-06	2.30735e-05	down
TraesCS2B02G234800	3.2647	1.70695	0.000841388	0.00415282	up		TraesCS2D02G025700	0.412081	-1.279	2.66702e-05	0.000179915	down
TraesCS2B02G236900	22.6909	4.50404	1.61915e-23	4.71653e-22	up		TraesCS2D02G028600	0.367453	-1.44437	5.21238e-20	1.28623e-18	down
TraesCS2B02G240200	3.29769	1.72145	4.77617e-05	0.0003071	up		TraesCS2D02G037400	0.401115	-1.31791	6.66829e-41	3.66889e-39	down
TraesCS2B02G243000	2.20163	1.13857	5.46439e-05	0.000347383	up		TraesCS2D02G038300	0.347088	-1.52663	0.00474729	0.0191186	down
TraesCS2B02G243100	2.16711	1.11577	3.01225e-05	0.000200959	up		TraesCS2D02G043300	0.254743	-1.97288	8.46408e-15	1.55231e-13	down
TraesCS2B02G244100	6.93039	2.79294	0	0	up		TraesCS2D02G043700	0.4801	-1.05859	0.000109546	0.000655659	down
TraesCS2B02G244400	2.18449	1.1273	6.29328e-82	8.68387e-80	up		TraesCS2D02G044600	0.0123025	-6.3449	3.66562e-06	2.83287e-05	down
TraesCS2B02G244500	8.54198	3.09457	1.81548e-07	1.69203e-06	up		TraesCS2D02G055300	0.486829	-1.03851	0.00374992	0.0155432	down
TraesCS2B02G245900	9.63504	3.26829	7.7549e-298	1.21e-294	up		TraesCS2D02G058400	0.166343	-2.58777	3.38117e-18	7.60071e-17	down
TraesCS2B02G247300	4.33379	2.11563	2.48576e-29	9.30854e-28	up		TraesCS2D02G058900	0.298576	-1.74383	0.00135253	0.0063433	down
TraesCS2B02G247900	2.79076	1.48066	2.08283e-17	4.45499e-16	up		TraesCS2D02G063900	0.329061	-1.60357	0.00611449	0.0237644	down
TraesCS2B02G256000	3.0081	1.58885	0.00915527	0.0334806	up		TraesCS2D02G064500	0.497824	-1.00629	3.0829e-10	3.91897e-09	down
TraesCS2B02G261900	3.47496	1.797	1.97164e-05	0.000135983	up		TraesCS2D02G064600	0.486914	-1.03826	1.33358e-17	2.89516e-16	down
TraesCS2B02G263900	2.91215	1.54208	8.85875e-46	5.58625e-44	up		TraesCS2D02G065100	0.467103	-1.09819	1.00075e-78	1.28748e-76	down
TraesCS2B02G264000	193.459	7.59588	4.78565e-24	1.42823e-22	up		TraesCS2D02G067000	0.459142	-1.12299	0.0008788	0.00431752	down
TraesCS2B02G267900	2.22122	1.15135	2.07129e-62	1.9421e-60	up		TraesCS2D02G070400	0.0149551	-6.06322	1.32614e-05	9.41529e-05	down
TraesCS2B02G270700	2.42523	1.27812	7.56396e-25	2.32466e-23	up		TraesCS2D02G072900	0.486873	-1.03838	0.0054423	0.0214895	down
TraesCS2B02G272600	2.80461	1.4878	1.80512e-16	3.66029e-15	up		TraesCS2D02G074700	0.123024	-3.02299	0.000906233	0.00443903	down
TraesCS2B02G276100	8.53416	3.09325	5.35574e-13	8.63789e-12	up		TraesCS2D02G082100	0.153606	-2.7027	0.00259222	0.0112352	down
TraesCS2B02G278400	2.40593	1.2666	1.68432e-17	3.62683e-16	up		TraesCS2D02G085500	0.446161	-1.16436	3.08136e-06	2.40888e-05	down
TraesCS2B02G279200	2.33226	1.22173	0.00110935	0.0053184	up		TraesCS2D02G088800	0.0135734	-6.20307	1.10072e-05	7.92391e-05	down
TraesCS2B02G282400	2.36445	1.2415	1.25734e-18	2.89598e-17	up		TraesCS2D02G093100	0.130987	-2.9325	5.98176e-62	5.56578e-60	down
TraesCS2B02G286300	2.5423	1.34613	7.00448e-16	1.37186e-14	up		TraesCS2D02G093800	0.171082	-2.54724	6.57905e-06	4.90322e-05	down
TraesCS2B02G288500	5.39272	2.43101	4.13777e-05	0.000268922	up		TraesCS2D02G097800	0.117098	-3.09421	7.11187e-09	7.80472e-08	down
TraesCS2B02G289800	88.3556	6.46525	2.81494e-73	3.33908e-71	up		TraesCS2D02G098400	0.293762	-1.76728	3.6786e-06	2.84254e-05	down
TraesCS2B02G289900	18.0267	4.17206	0	0	up		TraesCS2D02G099500	0.317074	-1.65711	0.0125228	0.0437876	down
TraesCS2B02G290000	2.22076	1.15106	0.00287195	0.0122883	up		TraesCS2D02G099700	0.304221	-1.71681	0.000519154	0.00269116	down
TraesCS2B02G293700	2.16239	1.11262	1.178e-15	2.27713e-14	up		TraesCS2D02G104300	0.424139	-1.23739	4.88945e-40	2.61913e-38	down
TraesCS2B02G295300	2.0336	1.02403	1.63538e-44	9.98155e-43	up		TraesCS2D02G113100	0.365735	-1.45113	1.86308e-06	1.50781e-05	down
TraesCS2B02G296100	3.16411	1.6618	9.17115e-06	6.68683e-05	up		TraesCS2D02G115300	0.347903	-1.52324	1.38828e-05	9.82892e-05	down
TraesCS2B02G298900	2.60471	1.38112	4.59968e-22	1.25347e-20	up		TraesCS2D02G115900	0.418459	-1.25684	0.000365115	0.00195787	down
TraesCS2B02G299700	2.91516	1.54357	7.20588e-19	1.68198e-17	up		TraesCS2D02G117100	0.221911	-2.17195	7.21499e-47	4.67568e-45	down
TraesCS2B02G303600	8.54998	3.09592	2.47389e-26	8.12858e-25	up		TraesCS2D02G117200	0.371079	-1.4302	4.21825e-10	5.29255e-09	down
TraesCS2B02G304900	2.11382	1.07985	3.492e-29	1.29649e-27	up		TraesCS2D02G119100	0.0272538	-5.1974	2.75414e-30	1.07364e-28	down
TraesCS2B02G305900	7.4035	2.88821	3.38435e-102	6.60078e-100	up		TraesCS2D02G125800	0.0501748	-4.31689	1.27704e-06	1.05887e-05	down
TraesCS2B02G306600	3.37344	1.75422	3.18122e-07	2.87301e-06	up		TraesCS2D02G128600	0.433038	-1.20744	2.57345e-12	3.91989e-11	down
TraesCS2B02G308500	6.57629	2.71727	1.56881e-13	2.63353e-12	up		TraesCS2D02G129900	0.49267	-1.02131	0.0145528	0.0496311	down
TraesCS2B02G315900	3.02527	1.59707	0.000156028	0.000905887	up		TraesCS2D02G130200	0.315698	-1.66338	0.00597296	0.0232812	down
TraesCS2B02G320700	3.60036	1.84814	0.00696076	0.0265	up		TraesCS2D02G131100	0.273444	-1.87068	1.33086e-12	2.07548e-11	down
TraesCS2B02G324400	3.91107	1.96757	1.27722e-116	3.12134e-114	up		TraesCS2D02G133900	0.43467	-1.20201	0.000125974	0.0007457	down
TraesCS2B02G326200	2.03054	1.02186	0.000319991	0.00173502	up		TraesCS2D02G134300	0.453927	-1.13947	0.00904455	0.0331362	down
TraesCS2B02G326400	2.08497	1.06003	3.03443e-45	1.89386e-43	up		TraesCS2D02G134700	0.494684	-1.01542	1.14492e-28	4.1744e-27	down
TraesCS2B02G333600	3.37419	1.75454	1.1239e-74	1.35967e-72	up		TraesCS2D02G136500	0.0112462	-6.47442	1.51643e-06	1.24196e-05	down
TraesCS2B02G338900	2.42212	1.27627	0.00995854	0.035945	up		TraesCS2D02G136600	0.406597	-1.29833	0.00075253	0.00375137	down
TraesCS2B02G341400	3.76701	1.91342	6.44757e-07	5.57867e-06	up		TraesCS2D02G141900	0.0206937	-5.59466	0.000198324	0.00112599	down
TraesCS2B02G342100	3.31896	1.73073	0.00192376	0.00865479	up		TraesCS2D02G146800	0.318448	-1.65087	0.000156853	0.000910245	down
TraesCS2B02G343300	11.4963	3.5231	4.26093e-05	0.000276542	up		TraesCS2D02G148500	0.0195963	-5.67327	0.000105018	0.000630294	down
TraesCS2B02G345300	2.06991	1.04957	0.00954016	0.0346476	up		TraesCS2D02G150600	0.393801	-1.34446	5.2404e-07	4.58766e-06	down
TraesCS2B02G349100	3.2749	1.71145	1.42939e-12	2.2223e-11	up		TraesCS2D02G157000	0.422483	-1.24303	3.55954e-05	0.000234219	down
TraesCS2B02G354400	2.41244	1.27049	1.5531e-25	4.92492e-24	up		TraesCS2D02G157300	0.462763	-1.11165	8.56344e-08	8.29781e-07	down
TraesCS2B02G361700	2.00498	1.00359	0.0047701	0.0191901	up		TraesCS2D02G157500	0.159274	-2.65042	1.599e-28	5.79527e-27	down
TraesCS2B02G369500	30.874	4.94832	0.00220793	0.00976574	up		TraesCS2D02G157600	0.434988	-1.20095	9.43313e-06	6.86797e-05	down
TraesCS2B02G370600	3.02272	1.59585	2.29592e-114	5.43624e-112	up		TraesCS2D02G157900	0.441035	-1.18103	9.01393e-27	3.02213e-25	down
TraesCS2B02G373300	4.14148	2.05015	3.33142e-05	0.000220281	up		TraesCS2D02G158400	0.350485	-1.51257	0.00354689	0.0148025	down
TraesCS2B02G374800	2.80693	1.48899	0.00202228	0.00904584	up		TraesCS2D02G158600	0.267403	-1.90291	5.34448e-16	1.05318e-14	down
TraesCS2B02G377100	2.38304	1.2528	1.82206e-29	6.86964e-28	up		TraesCS2D02G163300	0.0987852	-3.33956	1.3178e-42	7.68844e-41	down
TraesCS2B02G393900	48.4958	5.59979	0.000179995	0.00103194	up		TraesCS2D02G163700	0.395354	-1.33878	2.78762e-06	2.19419e-05	down
TraesCS2B02G394400	2.08518	1.06017	3.22307e-15	6.08345e-14	up		TraesCS2D02G166500	0.0403279	-4.63208	0.00660318	0.0253352	down
TraesCS2B02G395100	5.6119	2.48849	1.52128e-05	0.000106984	up		TraesCS2D02G167700	0.139996	-2.83655	4.17315e-06	3.20394e-05	down
TraesCS2B02G395600	2.29813	1.20046	3.08839e-05	0.000205461	up		TraesCS2D02G168000	0.0221983	-5.49341	5.41245e-05	0.000344445	down
TraesCS2B02G395900	2.17967	1.12411	0.000304956	0.00166134	up		TraesCS2D02G168600	0.129158	-2.95279	7.60584e-47	4.92373e-45	down
TraesCS2B02G398900	34.8878	5.12465	8.79664e-06	6.42223e-05	up		TraesCS2D02G168800	0.420374	-1.25026	6.62605e-07	5.72495e-06	down
TraesCS2B02G399200	4.32809	2.11373	5.24742e-98	9.53181e-96	up		TraesCS2D02G172500	0.118979	-3.07122	2.18062e-07	2.01359e-06	down
TraesCS2B02G412600	3.21665	1.68556	0.000578902	0.00296551	up		TraesCS2D02G173000	0.0114419	-6.44953	1.87081e-06	1.51366e-05	down
TraesCS2B02G413000	3.57743	1.83892	3.86707e-15	7.26069e-14	up		TraesCS2D02G177100	0.172538	-2.53501	3.57993e-84	5.11376e-82	down
TraesCS2B02G413500	2.0009	1.00065	1.40266e-17	3.04187e-16	up		TraesCS2D02G180200	0.415435	-1.26731	0.00370604	0.0153886	down
TraesCS2B02G415300	3.07879	1.62236	7.40349e-35	3.3848e-33	up		TraesCS2D02G181900	0.232101	-2.10717	7.04685e-34	3.1232e-32	down
TraesCS2B02G417300	2.32023	1.21427	8.27325e-09	9.00454e-08	up		TraesCS2D02G182600	0.0423746	-4.56066	0.00942637	0.0342906	down
TraesCS2B02G417600	3.04596	1.6069	0.0028756	0.0123022	up		TraesCS2D02G183800	0.054932	-4.18621	0.00681317	0.0260146	down
TraesCS2B02G417900	3.29914	1.72209	1.83336e-53	1.41758e-51	up		TraesCS2D02G193400	0.00984885	-6.66583	6.86885e-19	1.60393e-17	down
TraesCS2B02G418400	2.43731	1.28529	3.12692e-15	5.90564e-14	up		TraesCS2D02G200700	0.401156	-1.31776	1.88148e-61	1.72688e-59	down
TraesCS2B02G418600	6.79367	2.76419	2.72535e-40	1.46894e-38	up		TraesCS2D02G204900	0.441794	-1.17856	0.00117612	0.00560053	down
TraesCS2B02G423700	6.86152	2.77853	0.0129265	0.0449695	up		TraesCS2D02G214100	0.128736	-2.95752	4.26058e-33	1.84006e-31	down
TraesCS2B02G435900	7.20565	2.84913	8.45476e-126	2.37092e-123	up		TraesCS2D02G216500	0.164479	-2.60402	0.000236778	0.00131969	down
TraesCS2B02G437200	2.45071	1.2932	2.18773e-41	1.21912e-39	up		TraesCS2D02G219800	0.40786	-1.29385	0.000701381	0.0035212	down
TraesCS2B02G437900	4.15127	2.05355	1.06873e-24	3.26971e-23	up		TraesCS2D02G220600	0.158391	-2.65843	6.05061e-15	1.12015e-13	down
TraesCS2B02G444500	15.2426	3.93004	3.23128e-16	6.45959e-15	up		TraesCS2D02G221400	0.43555	-1.19909	0.0121001	0.0425027	down
TraesCS2B02G445100	4.55118	2.18624	4.39429e-19	1.03324e-17	up		TraesCS2D02G221500	0.356368	-1.48856	0.00269485	0.0116204	down
TraesCS2B02G445200	4.50543	2.17167	1.55175e-07	1.45856e-06	up		TraesCS2D02G225400	0.240952	-2.05318	8.50292e-05	0.000519393	down
TraesCS2B02G445300	4.32218	2.11176	1.01793e-21	2.71442e-20	up		TraesCS2D02G225900	0.328839	-1.60455	0.0133072	0.0460332	down
TraesCS2B02G445500	4.76072	2.25118	3.91172e-10	4.91709e-09	up		TraesCS2D02G231100	0.27625	-1.85595	6.89128e-179	3.32816e-176	down
TraesCS2B02G445600	4.42427	2.14544	2.79744e-10	3.56801e-09	up		TraesCS2D02G233800	0.227396	-2.13672	0.004969	0.0198708	down
TraesCS2B02G445700	2.14468	1.10076	1.59386e-05	0.000111636	up		TraesCS2D02G237800	0.418149	-1.25791	1.16375e-08	1.24764e-07	down
TraesCS2B02G445800	22.6759	4.50309	0.0024941	0.0108578	up		TraesCS2D02G239500	0.408273	-1.29239	0.00330535	0.0139105	down
TraesCS2B02G445900	538.538	9.0729	3.07901e-14	5.43241e-13	up		TraesCS2D02G241200	0.253086	-1.9823	0.00362158	0.015078	down
TraesCS2B02G446100	2.44751	1.29131	5.48946e-07	4.79191e-06	up		TraesCS2D02G254400	0.347311	-1.5257	1.67723e-26	5.56808e-25	down
TraesCS2B02G448100	2.63054	1.39536	3.92168e-43	2.31466e-41	up		TraesCS2D02G257100	0.295039	-1.76102	0.00372218	0.0154387	down
TraesCS2B02G449100	2.69784	1.43181	9.6689e-28	3.39707e-26	up		TraesCS2D02G259200	0.24494	-2.0295	1.48466e-22	4.11969e-21	down
TraesCS2B02G451000	4.78822	2.25949	0.00398356	0.0163966	up		TraesCS2D02G262000	0.405448	-1.30241	5.04735e-13	8.17301e-12	down
TraesCS2B02G454100	2.54638	1.34845	3.1552e-15	5.95719e-14	up		TraesCS2D02G264600	0.312309	-1.67895	8.7117e-12	1.26582e-10	down
TraesCS2B02G455800	60.6572	5.92261	8.79816e-06	6.42258e-05	up		TraesCS2D02G266400	0.427858	-1.2248	0.00289352	0.012371	down
TraesCS2B02G456000	15.8484	3.98626	8.63337e-07	7.33228e-06	up		TraesCS2D02G266600	0.421414	-1.24669	5.0015e-26	1.61975e-24	down
TraesCS2B02G456100	2.53856	1.34401	4.48442e-39	2.34036e-37	up		TraesCS2D02G267700	0.437989	-1.19103	1.77907e-46	1.13838e-44	down
TraesCS2B02G457200	2.39398	1.25941	0.000207778	0.0011742	up		TraesCS2D02G268600	0.25535	-1.96945	2.17151e-05	0.000148607	down
TraesCS2B02G459000	5.9531	2.57364	1.45323e-206	9.6122e-204	up		TraesCS2D02G273400	0.368704	-1.43947	1.47585e-08	1.5627e-07	down
TraesCS2B02G464700	66.8322	6.06247	2.84413e-05	0.000190838	up		TraesCS2D02G273600	0.142042	-2.81561	7.17743e-220	5.39211e-217	down
TraesCS2B02G468000	112.46	6.81327	2.35706e-07	2.16763e-06	up		TraesCS2D02G274100	0.38613	-1.37284	0.000246924	0.00136997	down
TraesCS2B02G468200	3.0402	1.60417	1.21006e-118	3.04274e-116	up		TraesCS2D02G283600	0.403063	-1.31092	0.00208685	0.0092937	down
TraesCS2B02G474600	6.3072	2.657	8.2428e-217	5.97132e-214	up		TraesCS2D02G285700	0.318331	-1.6514	1.35462e-41	7.61845e-40	down
TraesCS2B02G474700	3.65149	1.86848	6.78128e-23	1.91843e-21	up		TraesCS2D02G288900	0.279024	-1.84154	1.06082e-22	2.96659e-21	down
TraesCS2B02G474900	4.1546	2.05471	6.05872e-09	6.70336e-08	up		TraesCS2D02G293200	0.074428	-3.74801	1.89572e-05	0.000131059	down
TraesCS2B02G475100	2.51884	1.33276	1.45758e-06	1.19763e-05	up		TraesCS2D02G300000	0.105955	-3.23847	0	0	down
TraesCS2B02G478000	2.45039	1.29301	0.0144796	0.0494175	up		TraesCS2D02G300100	0.0606185	-4.0441	0	0	down
TraesCS2B02G478400	3.84541	1.94314	0.000339364	0.00183157	up		TraesCS2D02G301200	0.323666	-1.62742	6.64897e-05	0.000415148	down
TraesCS2B02G482000	3.69693	1.88633	1.72336e-77	2.18025e-75	up		TraesCS2D02G306000	0.037681	-4.73002	1.12127e-11	1.61266e-10	down
TraesCS2B02G482300	4.8586	2.28054	0.000230395	0.00128766	up		TraesCS2D02G306700	0.0228909	-5.44908	1.27264e-11	1.82519e-10	down
TraesCS2B02G482500	8.4217	3.07411	4.9357e-05	0.000316555	up		TraesCS2D02G313700	0.240497	-2.05591	1.30449e-110	2.89711e-108	down
TraesCS2B02G483400	15.5814	3.96175	1.33667e-16	2.73133e-15	up		TraesCS2D02G314400	0.123382	-3.01879	1.38214e-12	2.15324e-11	down
TraesCS2B02G484200	49.6953	5.63504	0.000126416	0.000748155	up		TraesCS2D02G319800	0.408464	-1.29172	1.1076e-25	3.52694e-24	down
TraesCS2B02G484300	2.6321	1.39621	5.00224e-25	1.54359e-23	up		TraesCS2D02G323900	0.438489	-1.18939	1.01815e-05	7.36701e-05	down
TraesCS2B02G485500	2.20495	1.14074	1.91871e-08	2.0027e-07	up		TraesCS2D02G325900	0.440803	-1.18179	6.50782e-07	5.6268e-06	down
TraesCS2B02G490100	4.39964	2.13739	1.70299e-293	2.52756e-290	up		TraesCS2D02G331600	0.441558	-1.17933	7.75707e-08	7.55495e-07	down
TraesCS2B02G498100	3.27336	1.71077	0.00131188	0.00617595	up		TraesCS2D02G331800	0.472601	-1.08131	6.24333e-07	5.41118e-06	down
TraesCS2B02G503500	2.18336	1.12655	7.96306e-07	6.80478e-06	up		TraesCS2D02G335600	0.188358	-2.40845	0.013233	0.045813	down
TraesCS2B02G507800	2.26202	1.17761	0.000126951	0.000750969	up		TraesCS2D02G336800	0.0675958	-3.88692	0	0	down
TraesCS2B02G510700	7.93857	2.98888	0.00140601	0.00656022	up		TraesCS2D02G336900	0.010851	-6.52602	1.66499e-49	1.16592e-47	down
TraesCS2B02G511600	2.18133	1.12521	6.83795e-09	7.5231e-08	up		TraesCS2D02G339600	0.465377	-1.10353	8.30795e-18	1.82907e-16	down
TraesCS2B02G512100	3.49096	1.80362	6.42395e-20	1.57816e-18	up		TraesCS2D02G340600	0.116174	-3.10564	6.45586e-13	1.03546e-11	down
TraesCS2B02G513800	75.5621	6.23959	9.05962e-06	6.6063e-05	up		TraesCS2D02G347200	0.229938	-2.12068	3.66125e-26	1.19525e-24	down
TraesCS2B02G513900	103.286	6.69051	4.55384e-52	3.38766e-50	up		TraesCS2D02G351000	0.0828465	-3.59341	0.00797867	0.0297736	down
TraesCS2B02G514000	27.7796	4.79596	0.00440452	0.0178897	up		TraesCS2D02G351100	0.0491278	-4.34732	7.83405e-07	6.70017e-06	down
TraesCS2B02G515800	3.43412	1.77994	1.14304e-08	1.22609e-07	up		TraesCS2D02G352400	0.383966	-1.38095	0.00371098	0.015406	down
TraesCS2B02G516700	3.07842	1.62219	1.59925e-06	1.30663e-05	up		TraesCS2D02G354100	0.162064	-2.62537	0.0086262	0.0318115	down
TraesCS2B02G517400	2.51774	1.33213	4.24412e-07	3.76368e-06	up		TraesCS2D02G358600	0.392128	-1.3506	0.0098462	0.0356114	down
TraesCS2B02G521100	4.19482	2.06861	5.13896e-27	1.73924e-25	up		TraesCS2D02G358700	0.244214	-2.03378	0.00107295	0.00516053	down
TraesCS2B02G521300	13.1132	3.71294	5.07299e-30	1.965e-28	up		TraesCS2D02G361400	0.359432	-1.47621	5.57544e-37	2.72293e-35	down
TraesCS2B02G521500	50.5713	5.66025	0.000116971	0.000696335	up		TraesCS2D02G364500	0.027929	-5.16209	2.30891e-10	2.9673e-09	down
TraesCS2B02G534800	2.13749	1.09592	2.05015e-07	1.89858e-06	up		TraesCS2D02G364600	0.28594	-1.80621	1.47547e-72	1.70694e-70	down
TraesCS2B02G538600	11.0687	3.46841	1.36115e-232	1.13464e-229	up		TraesCS2D02G364800	0.460533	-1.11862	2.87293e-10	3.66199e-09	down
TraesCS2B02G538700	27.8198	4.79804	1.51701e-84	2.18234e-82	up		TraesCS2D02G366000	0.0569394	-4.13443	0.00809527	0.0301434	down
TraesCS2B02G538800	7.14976	2.8379	0	0	up		TraesCS2D02G367700	0.0310736	-5.00817	0.00183049	0.00828111	down
TraesCS2B02G539100	2.92483	1.54835	6.48753e-19	1.51605e-17	up		TraesCS2D02G367900	0.145282	-2.78307	0.00135143	0.0063391	down
TraesCS2B02G539600	2.00621	1.00447	2.6234e-13	4.33685e-12	up		TraesCS2D02G368600	0.420865	-1.24857	1.39349e-14	2.52146e-13	down
TraesCS2B02G539900	2.01285	1.00924	2.18216e-06	1.74584e-05	up		TraesCS2D02G369800	0.434152	-1.20373	0.00265536	0.0114761	down
TraesCS2B02G551700	69.1886	6.11246	2.20235e-06	1.7613e-05	up		TraesCS2D02G372000	0.359216	-1.47707	8.3188e-08	8.08006e-07	down
TraesCS2B02G553700	24.1105	4.59159	0.0093666	0.0341242	up		TraesCS2D02G374200	0.445087	-1.16784	0.00974597	0.0352845	down
TraesCS2B02G557100	7.83779	2.97045	8.00053e-15	1.47217e-13	up		TraesCS2D02G374400	0.191985	-2.38094	3.02096e-07	2.73966e-06	down
TraesCS2B02G560800	54.8347	5.77702	6.09706e-05	0.000384196	up		TraesCS2D02G374600	0.11887	-3.07254	6.77675e-05	0.000422047	down
TraesCS2B02G561000	125.116	6.96712	1.99415e-20	5.02059e-19	up		TraesCS2D02G375400	0.421631	-1.24595	0.0103965	0.0372934	down
TraesCS2B02G561100	15.4273	3.94742	8.37038e-19	1.94707e-17	up		TraesCS2D02G376100	0.453309	-1.14143	3.46226e-23	9.93331e-22	down
TraesCS2B02G563400	40.106	5.32575	0.000583522	0.00298516	up		TraesCS2D02G377100	0.226351	-2.14337	1.10144e-05	7.92819e-05	down
TraesCS2B02G563700	2.97986	1.57525	5.15779e-08	5.13097e-07	up		TraesCS2D02G378700	0.310362	-1.68798	4.14185e-07	3.67941e-06	down
TraesCS2B02G563800	8.15261	3.02726	2.93501e-178	1.40631e-175	up		TraesCS2D02G378800	0.130455	-2.93838	1.22857e-09	1.47284e-08	down
TraesCS2B02G563900	116.688	6.86652	2.05769e-07	1.90498e-06	up		TraesCS2D02G380200	0.203811	-2.29469	0.0145708	0.0496842	down
TraesCS2B02G567800	3.14298	1.65213	4.27098e-05	0.000277106	up		TraesCS2D02G381000	0.0485542	-4.36426	1.99895e-152	7.32772e-150	down
TraesCS2B02G568600	2.67697	1.4206	0.0130653	0.0453563	up		TraesCS2D02G381300	0.026407	-5.24293	0.0006696	0.00337613	down
TraesCS2B02G568800	5.7389	2.52077	9.99367e-24	2.93501e-22	up		TraesCS2D02G385000	0.427454	-1.22616	0.00529785	0.0209954	down
TraesCS2B02G570400	2.00723	1.0052	0.0100744	0.0362986	up		TraesCS2D02G387100	0.124792	-3.0024	0.00402008	0.0165212	down
TraesCS2B02G571300	4.00416	2.0015	0.000929146	0.00453957	up		TraesCS2D02G387700	0.365952	-1.45027	1.07418e-19	2.60839e-18	down
TraesCS2B02G574500	5.79984	2.53601	0.0102181	0.0367444	up		TraesCS2D02G388800	0.296785	-1.75251	1.87917e-44	1.14581e-42	down
TraesCS2B02G577400	7.20245	2.84849	0.000405022	0.00215046	up		TraesCS2D02G393400	0.402257	-1.31381	0.00063281	0.00321229	down
TraesCS2B02G578200	7.17841	2.84366	2.62583e-11	3.65562e-10	up		TraesCS2D02G396300	0.258778	-1.95021	0.000149411	0.000869963	down
TraesCS2B02G583700	22.2083	4.47303	0.00266486	0.0115131	up		TraesCS2D02G399400	0.462357	-1.11292	0.000231255	0.00129198	down
TraesCS2B02G592800	2.23328	1.15917	0.00980353	0.0354697	up		TraesCS2D02G400100	0.00575829	-7.44014	3.93822e-09	4.47558e-08	down
TraesCS2B02G595300	2.28822	1.19422	4.19752e-09	4.74684e-08	up		TraesCS2D02G401200	0.465841	-1.10209	0.00316134	0.0133714	down
TraesCS2B02G602449	2.7325	1.45022	1.48498e-08	1.57182e-07	up		TraesCS2D02G401500	0.463614	-1.109	2.27844e-12	3.4836e-11	down
TraesCS2B02G602900	2.76347	1.46648	3.34889e-10	4.23937e-09	up		TraesCS2D02G403800	0.0867568	-3.52688	7.44748e-242	7.19355e-239	down
TraesCS2B02G603600	4.05713	2.02046	7.60478e-42	4.32088e-40	up		TraesCS2D02G405800	0.130722	-2.93542	0.00637517	0.0245938	down
TraesCS2B02G608900	2.28714	1.19355	3.11226e-52	2.32377e-50	up		TraesCS2D02G408700	0.397074	-1.33252	2.23342e-25	7.0092e-24	down
TraesCS2B02G613900	10.1065	3.33722	9.07613e-10	1.10174e-08	up		TraesCS2D02G408900	0.00235054	-8.73279	7.30302e-13	1.16733e-11	down
TraesCS2B02G618000	3.57195	1.83671	0.00231797	0.0101836	up		TraesCS2D02G425200	0.0993228	-3.33173	3.83552e-08	3.87577e-07	down
TraesCS2B02G624600	3.61824	1.85529	6.3735e-11	8.60529e-10	up		TraesCS2D02G425300	0.00544979	-7.51958	2.98945e-09	3.44664e-08	down
TraesCS2B02G627900	20.7164	4.3727	3.64832e-39	1.90892e-37	up		TraesCS2D02G431500	0.172612	-2.53439	9.48014e-14	1.61502e-12	down
TraesCS2D02G003200	3.56054	1.83209	1.82712e-06	1.48146e-05	up		TraesCS2D02G431600	0.359041	-1.47778	0.00343351	0.0143796	down
TraesCS2D02G005000	248.15	7.95507	5.05256e-11	6.8798e-10	up		TraesCS2D02G435600	0.487448	-1.03668	0.00155041	0.00715334	down
TraesCS2D02G010600	9.70654	3.27896	0.000895773	0.00439345	up		TraesCS2D02G439900	0.432604	-1.20888	0.0117071	0.0412962	down
TraesCS2D02G011700	2.74624	1.45746	5.68164e-05	0.000359995	up		TraesCS2D02G448300	0.0157939	-5.98449	2.03999e-05	0.000140252	down
TraesCS2D02G015700	104.53	6.70777	3.02666e-10	3.84908e-09	up		TraesCS2D02G454000	0.0607958	-4.03988	0.00965831	0.0350213	down
TraesCS2D02G017500	24.45	4.61176	0.00910323	0.0333143	up		TraesCS2D02G454400	0.352363	-1.50487	0.00440216	0.0178825	down
TraesCS2D02G017600	11.2791	3.49558	0.00188706	0.00851045	up		TraesCS2D02G457000	0.482541	-1.05128	0.00334914	0.014066	down
TraesCS2D02G021500	6.11314	2.61191	1.73057e-05	0.000120366	up		TraesCS2D02G459800	0.4831	-1.04961	0.0126417	0.0441451	down
TraesCS2D02G022300	8.69702	3.12052	0.000445553	0.00234743	up		TraesCS2D02G464200	0.476584	-1.0692	2.2072e-07	2.03597e-06	down
TraesCS2D02G022400	34.0765	5.09071	0.00216174	0.00958792	up		TraesCS2D02G464400	0.0342929	-4.86595	0.00369883	0.015366	down
TraesCS2D02G024300	15.3762	3.94263	6.43746e-11	8.68779e-10	up		TraesCS2D02G468300	0.376797	-1.40814	0.00010113	0.000608762	down
TraesCS2D02G025400	2.53129	1.33988	2.03357e-101	3.89141e-99	up		TraesCS2D02G468600	0.442581	-1.17599	2.15175e-06	1.72423e-05	down
TraesCS2D02G025500	2.71766	1.44237	0.0091861	0.0335832	up		TraesCS2D02G471000	0.339749	-1.55746	0.0133532	0.0461635	down
TraesCS2D02G027900	23.7996	4.57286	0.0079204	0.0295834	up		TraesCS2D02G473500	0.256621	-1.96229	0.00211659	0.0094096	down
TraesCS2D02G029600	9.7463	3.28485	4.38004e-10	5.49103e-09	up		TraesCS2D02G477800	0.0420996	-4.57005	0.00183386	0.00829451	down
TraesCS2D02G029700	9.09412	3.18493	1.19805e-28	4.3655e-27	up		TraesCS2D02G480600	0.211325	-2.24246	0.00149302	0.00692267	down
TraesCS2D02G029800	4.27367	2.09548	1.34371e-15	2.58757e-14	up		TraesCS2D02G481100	0.175259	-2.51244	0.000675726	0.00340335	down
TraesCS2D02G029900	4.60035	2.20174	5.00938e-05	0.000320807	up		TraesCS2D02G481900	0.168484	-2.56932	0.000594157	0.00303294	down
TraesCS2D02G030000	5.8139	2.53951	5.98785e-05	0.000378019	up		TraesCS2D02G483000	0.00558751	-7.48358	6.20751e-35	2.84871e-33	down
TraesCS2D02G030100	6.91935	2.79064	6.3205e-07	5.47339e-06	up		TraesCS2D02G483300	0.0761837	-3.71437	2.62679e-48	1.77804e-46	down
TraesCS2D02G035700	2.84847	1.51018	6.21552e-10	7.66884e-09	up		TraesCS2D02G483700	0.437662	-1.19211	4.21932e-13	6.87243e-12	down
TraesCS2D02G047500	5.90037	2.56081	5.52006e-14	9.56182e-13	up		TraesCS2D02G483800	0.292435	-1.77381	2.48652e-17	5.28871e-16	down
TraesCS2D02G050300	2.11488	1.08058	6.17475e-24	1.82934e-22	up		TraesCS2D02G483900	0.249243	-2.00438	0.000101189	0.000609057	down
TraesCS2D02G050700	2.25477	1.17298	0.00195351	0.00876851	up		TraesCS2D02G484500	0.0326889	-4.93506	0.00223227	0.00986049	down
TraesCS2D02G051800	55.6404	5.79806	3.41681e-57	2.87182e-55	up		TraesCS2D02G493500	0.248799	-2.00695	9.05353e-136	2.83982e-133	down
TraesCS2D02G053300	2.16448	1.11402	1.09731e-20	2.79856e-19	up		TraesCS2D02G493600	0.465517	-1.10309	1.3857e-31	5.65926e-30	down
TraesCS2D02G057700	9.81965	3.29567	9.21606e-56	7.52773e-54	up		TraesCS2D02G499800	0.414611	-1.27017	1.42184e-11	2.03008e-10	down
TraesCS2D02G063000	3.71074	1.89171	1.02975e-86	1.55106e-84	up		TraesCS2D02G500000	0.297844	-1.74737	1.40771e-09	1.678e-08	down
TraesCS2D02G065400	6.88811	2.78411	1.80385e-95	3.15424e-93	up		TraesCS2D02G502700	0.446026	-1.1648	1.98819e-07	1.84542e-06	down
TraesCS2D02G068500	11.7605	3.55587	0.000410836	0.00217847	up		TraesCS2D02G505400	0.285438	-1.80875	0.00158115	0.00727696	down
TraesCS2D02G071400	3.13224	1.64719	0.00010062	0.000605989	up		TraesCS2D02G506300	0.194451	-2.36252	3.35009e-283	4.74092e-280	down
TraesCS2D02G073400	3.34406	1.7416	4.91377e-52	3.65095e-50	up		TraesCS2D02G506900	0.057474	-4.12095	0.00152927	0.00706813	down
TraesCS2D02G079100	10.8466	3.43918	6.67881e-07	5.7689e-06	up		TraesCS2D02G507800	0.429696	-1.21861	2.87075e-13	4.73416e-12	down
TraesCS2D02G087700	2.26225	1.17776	1.21668e-12	1.90524e-11	up		TraesCS2D02G507900	0.122502	-3.02913	5.86726e-09	6.49981e-08	down
TraesCS2D02G088500	2.13005	1.09089	2.94632e-23	8.48104e-22	up		TraesCS2D02G509500	0.343547	-1.54142	1.67109e-11	2.36817e-10	down
TraesCS2D02G090500	3.91388	1.9686	0.000343653	0.00185242	up		TraesCS2D02G514600	0.121154	-3.04509	0.0115131	0.0407345	down
TraesCS2D02G096000	3.904	1.96495	0.00822774	0.030583	up		TraesCS2D02G514700	0.075754	-3.72253	2.70433e-19	6.44843e-18	down
TraesCS2D02G099800	9.66195	3.27231	2.64999e-65	2.64356e-63	up		TraesCS2D02G515500	0.0135425	-6.20636	6.28256e-06	4.7001e-05	down
TraesCS2D02G100700	3.17293	1.66582	1.6787e-22	4.64964e-21	up		TraesCS2D02G515800	0.282999	-1.82113	9.96672e-36	4.68698e-34	down
TraesCS2D02G100900	4.63254	2.2118	1.13093e-102	2.21998e-100	up		TraesCS2D02G523100	0.0557426	-4.16508	0.000124272	0.00073641	down
TraesCS2D02G101300	3.91433	1.96876	0.000162252	0.000939424	up		TraesCS2D02G530000	0.0209985	-5.57357	0.000205436	0.00116247	down
TraesCS2D02G103800	9.48582	3.24577	6.73567e-77	8.45111e-75	up		TraesCS2D02G530300	0.317935	-1.6532	0.0123604	0.0432671	down
TraesCS2D02G104500	16.8284	4.07283	1.20385e-53	9.36785e-52	up		TraesCS2D02G538500	0.430429	-1.21615	1.22767e-14	2.2287e-13	down
TraesCS2D02G104600	16.6221	4.05503	3.71359e-24	1.1132e-22	up		TraesCS2D02G539600	0.0541553	-4.20675	1.39379e-07	1.317e-06	down
TraesCS2D02G104700	39.8087	5.31501	0.00057678	0.00295696	up		TraesCS2D02G540700	0.345032	-1.5352	1.39098e-08	1.47901e-07	down
TraesCS2D02G105600	39.2973	5.29636	0.000103116	0.000619671	up		TraesCS2D02G541200	0.00919007	-6.76571	7.5226e-08	7.33951e-07	down
TraesCS2D02G106400	2.49267	1.31769	1.76539e-23	5.13515e-22	up		TraesCS2D02G553700	0.0122352	-6.35282	3.1854e-06	2.48351e-05	down
TraesCS2D02G107100	2.28061	1.18942	2.74552e-13	4.53256e-12	up		TraesCS2D02G555300	0.181476	-2.46215	0.000634855	0.0032215	down
TraesCS2D02G107900	35.5285	5.15091	4.55574e-19	1.07037e-17	up		TraesCS2D02G558500	0.226284	-2.14379	0.00638058	0.0246115	down
[truncated: 2,861 more rows]

## Sheet: N1_1Y vs. N1_1W
Up-regulated							Down-regulated
[truncated: 4,739 more rows]

## Sheet: N0_1Y vs. N0_1W
Up-regulated							Down-regulated
[truncated: 2,124 more rows]
