# Supplementary material for: Transcriptome Analysis Reveals Different Responsive Patterns to Nitrogen Deficiency in Two Wheat Near-Isogenic Lines Contrasting for Nitrogen Use Efficiency
Source: Biology (Basel). 2021 Nov 3;10(11):1126. doi: 10.3390/biology10111126 (PMC8614915; doi:10.3390/biology10111126)
Supplement: Supplementary file 1 [file biology-10-01126-s001.zip › Table S3.xlsx]

## Sheet: N0_1Y vs. N1_1Y
Table S3: GO enrichment analysis of genes in pairwise comparisons
Accession	Term_Type	Term_name	p-value	FDR	Rich_Ratio	Number
GO:0009765	BP	photosynthesis, light harvesting	2.26291e-28	7.77042e-25	6.21831	50
GO:0006749	BP	glutathione metabolic process	4.12333e-28	7.77042e-25	3.63771	91
GO:0009768	BP	photosynthesis, light harvesting in photosystem I	1.53205e-21	1.92477e-18	8.11489	29
GO:0006575	BP	cellular modified amino acid metabolic process	5.87965e-20	3.6934e-17	2.62229	105
GO:0015849	BP	organic acid transport	5.83358e-20	3.6934e-17	2.54499	111
GO:0046942	BP	carboxylic acid transport	5.83358e-20	3.6934e-17	2.54499	111
GO:0010200	BP	response to chitin	1.43201e-17	7.71034e-15	2.42583	106
GO:0042221	BP	response to chemical	7.45236e-17	3.51099e-14	1.32652	767
GO:0006790	BP	sulfur compound metabolic process	1.55182e-16	6.49867e-14	1.95414	163
GO:0019253	BP	reductive pentose-phosphate cycle	2.00999e-16	6.88695e-14	5.10508	34
GO:0019685	BP	photosynthesis, dark reaction	2.00999e-16	6.88695e-14	5.10508	34
GO:0042493	BP	response to drug	2.48573e-16	7.80726e-14	1.71083	239
GO:0098656	BP	anion transmembrane transport	7.51816e-15	2.03e-12	2.44001	87
GO:0015711	BP	organic anion transport	7.54047e-15	2.03e-12	2.08309	123
GO:0006820	BP	anion transport	2.00659e-14	5.0419e-12	1.81093	174
GO:0010033	BP	response to organic substance	4.92889e-14	1.16106e-11	1.38081	504
GO:0006811	BP	ion transport	7.84328e-14	1.7389e-11	1.52537	307
GO:0006865	BP	amino acid transport	1.10434e-13	2.31236e-11	2.5863	71
GO:1901700	BP	response to oxygen-containing compound	2.68621e-13	5.3286e-11	1.34528	552
GO:0018298	BP	protein-chromophore linkage	4.72987e-13	8.91344e-11	2.87286	56
GO:1903825	BP	organic acid transmembrane transport	6.13342e-13	1.05077e-10	2.64424	64
GO:1905039	BP	carboxylic acid transmembrane transport	6.13342e-13	1.05077e-10	2.64424	64
GO:1901605	BP	alpha-amino acid metabolic process	7.84891e-13	1.2862e-10	1.82953	148
GO:1901698	BP	response to nitrogen compound	1.79702e-12	2.82207e-10	1.71436	176
GO:2000022	BP	regulation of jasmonic acid mediated signaling pathway	3.86151e-12	5.39038e-10	3.13023	45
GO:0010243	BP	response to organonitrogen compound	3.62317e-12	5.39038e-10	1.79352	148
GO:0005975	BP	carbohydrate metabolic process	3.77028e-12	5.39038e-10	1.38628	422
GO:0003333	BP	amino acid transmembrane transport	4.6098e-12	6.15173e-10	2.72524	56
GO:0016053	BP	organic acid biosynthetic process	4.89658e-12	6.15173e-10	1.5309	259
GO:0046394	BP	carboxylic acid biosynthetic process	4.89658e-12	6.15173e-10	1.5309	259
GO:0044283	BP	small molecule biosynthetic process	7.15554e-12	8.69976e-10	1.46164	314
GO:0046148	BP	pigment biosynthetic process	1.16181e-11	1.36839e-09	2.24117	79
GO:0009737	BP	response to abscisic acid	1.85877e-11	2.12294e-09	1.67239	174
GO:0008652	BP	cellular amino acid biosynthetic process	2.05581e-11	2.27892e-09	2.0245	98
GO:0009065	BP	glutamine family amino acid catabolic process	2.41056e-11	2.59583e-09	5.20903	22
GO:0097305	BP	response to alcohol	2.55451e-11	2.67443e-09	1.65527	178
GO:0009064	BP	glutamine family amino acid metabolic process	2.70467e-11	2.7551e-09	2.53994	59
GO:0009719	BP	response to endogenous stimulus	2.79688e-11	2.77406e-09	1.38933	384
GO:0030001	BP	metal ion transport	4.05364e-11	3.91748e-09	1.85296	121
GO:0009725	BP	response to hormone	7.70359e-11	7.25871e-09	1.39089	365
GO:0048527	BP	lateral root development	3.01151e-10	2.70247e-08	2.88891	42
GO:0042440	BP	pigment metabolic process	2.99413e-10	2.70247e-08	2.04798	84
GO:0048528	BP	post-embryonic root development	5.31335e-10	4.65721e-08	2.60043	49
GO:0071577	BP	zinc ion transmembrane transport	6.64327e-10	5.69056e-08	4.51449	22
GO:0033993	BP	response to lipid	3.23995e-09	2.71364e-07	1.51349	200
GO:0090696	BP	post-embryonic plant organ development	4.17622e-09	3.42177e-07	2.45244	49
GO:1900457	BP	regulation of brassinosteroid mediated signaling pathway	4.78727e-09	3.83898e-07	2.95157	35
GO:0009628	BP	response to abiotic stimulus	5.63088e-09	4.42141e-07	1.2386	638
GO:1901607	BP	alpha-amino acid biosynthetic process	7.73003e-09	5.94582e-07	1.91524	84
GO:0006829	BP	zinc ion transport	9.92338e-09	7.48024e-07	3.98338	22
GO:0006520	BP	cellular amino acid metabolic process	1.22778e-08	9.07355e-07	1.52519	179
GO:0006082	BP	organic acid metabolic process	1.2946e-08	9.38335e-07	1.30089	422
GO:0034220	BP	ion transmembrane transport	1.50437e-08	1.05e-06	1.63116	135
GO:0043436	BP	oxoacid metabolic process	1.48484e-08	1.05e-06	1.30026	420
GO:0055085	BP	transmembrane transport	1.58698e-08	1.08752e-06	1.4404	230
GO:0009636	BP	response to toxic substance	1.83796e-08	1.23701e-06	1.91258	80
GO:0090357	BP	regulation of tryptophan metabolic process	2.42797e-08	1.60544e-06	6.71578	12
GO:0006530	BP	asparagine catabolic process	2.68134e-08	1.71287e-06	9.23419	9
GO:0033345	BP	asparagine catabolic process via L-aspartate	2.68134e-08	1.71287e-06	9.23419	9
GO:0001101	BP	response to acid chemical	2.87887e-08	1.80841e-06	1.29636	412
GO:0009813	BP	flavonoid biosynthetic process	3.114e-08	1.92404e-06	1.88168	81
GO:0044281	BP	small molecule metabolic process	5.83935e-08	3.54976e-06	1.22715	602
GO:0009699	BP	phenylpropanoid biosynthetic process	8.77126e-08	5.1687e-06	1.78177	89
GO:0042445	BP	hormone metabolic process	8.77677e-08	5.1687e-06	1.61493	125
GO:1901606	BP	alpha-amino acid catabolic process	1.29218e-07	7.49265e-06	2.19079	50
GO:0019752	BP	carboxylic acid metabolic process	1.47891e-07	8.4455e-06	1.28966	384
GO:0009084	BP	glutamine family amino acid biosynthetic process	1.91305e-07	1.06033e-05	3.33155	23
GO:0009751	BP	response to salicylic acid	1.90164e-07	1.06033e-05	1.63488	113
GO:0009809	BP	lignin biosynthetic process	2.46726e-07	1.3477e-05	2.12856	51
GO:0006835	BP	dicarboxylic acid transport	2.66204e-07	1.43332e-05	3.01999	26
GO:0046677	BP	response to antibiotic	3.35065e-07	1.77867e-05	1.5257	143
GO:0044550	BP	secondary metabolite biosynthetic process	5.04332e-07	2.64004e-05	1.59629	115
GO:0009063	BP	cellular amino acid catabolic process	5.16304e-07	2.66569e-05	2.07922	51
GO:0009416	BP	response to light stimulus	7.23164e-07	3.68325e-05	1.40084	204
GO:0006521	BP	regulation of cellular amino acid metabolic process	8.71772e-07	4.3233e-05	4.02033	16
GO:0033238	BP	regulation of cellular amine metabolic process	8.71772e-07	4.3233e-05	4.02033	16
GO:0009812	BP	flavonoid metabolic process	1.28152e-06	6.27278e-05	1.70384	84
GO:0009308	BP	amine metabolic process	1.35816e-06	6.5627e-05	1.85408	64
GO:0014070	BP	response to organic cyclic compound	1.41316e-06	6.74201e-05	1.48704	143
GO:0015718	BP	monocarboxylic acid transport	1.84366e-06	8.68594e-05	2.49464	31
GO:0006721	BP	terpenoid metabolic process	1.93972e-06	9.02569e-05	1.66433	88
GO:0015995	BP	chlorophyll biosynthetic process	2.04299e-06	9.39027e-05	2.79824	25
GO:0009694	BP	jasmonic acid metabolic process	2.65464e-06	0.000120546	2.49573	30
GO:0009853	BP	photorespiration	3.0672e-06	0.000137622	2.47898	30
GO:0010438	BP	cellular response to sulfur starvation	3.61827e-06	0.000160438	7.03557	8
GO:0070838	BP	divalent metal ion transport	4.41055e-06	0.000186779	1.96515	49
GO:0072511	BP	divalent inorganic cation transport	4.41055e-06	0.000186779	1.96515	49
GO:0009072	BP	aromatic amino acid family metabolic process	4.39572e-06	0.000186779	1.92263	52
GO:0009698	BP	phenylpropanoid metabolic process	4.34683e-06	0.000186779	1.57849	100
GO:0009718	BP	anthocyanin-containing compound biosynthetic process	5.7585e-06	0.000241153	2.33131	32
GO:0042425	BP	choline biosynthetic process	6.94359e-06	0.000285625	9.23419	6
GO:0006525	BP	arginine metabolic process	6.972e-06	0.000285625	3.21189	18
GO:0000041	BP	transition metal ion transport	7.34906e-06	0.000294778	2.46245	28
GO:0009309	BP	amine biosynthetic process	7.43005e-06	0.000294778	2.30405	32
GO:0042401	BP	cellular biogenic amine biosynthetic process	7.43005e-06	0.000294778	2.30405	32
GO:1901615	BP	organic hydroxy compound metabolic process	9.23097e-06	0.000361516	1.4652	129
GO:0019748	BP	secondary metabolic process	9.30408e-06	0.000361516	1.42174	150
GO:0006558	BP	L-phenylalanine metabolic process	9.87518e-06	0.000372196	2.69697	23
GO:1902221	BP	erythrose 4-phosphate/phosphoenolpyruvate family amino acid metabolic process	9.87518e-06	0.000372196	2.69697	23
GO:0009753	BP	response to jasmonic acid	9.70451e-06	0.000372196	1.83516	55
GO:0009314	BP	response to radiation	1.1178e-05	0.000417126	1.33998	207
GO:0009625	BP	response to insect	1.15372e-05	0.000424709	2.99914	19
GO:0031408	BP	oxylipin biosynthetic process	1.16065e-05	0.000424709	2.36461	29
GO:0015740	BP	C4-dicarboxylate transport	1.19877e-05	0.000434441	3.22013	17
GO:0006066	BP	alcohol metabolic process	1.31154e-05	0.000470781	1.78528	58
GO:0046501	BP	protoporphyrinogen IX metabolic process	1.38957e-05	0.000489466	3.66748	14
GO:0006782	BP	protoporphyrinogen IX biosynthetic process	1.38957e-05	0.000489466	3.66748	14
GO:0034285	BP	response to disaccharide	1.48156e-05	0.000517036	2.14392	35
GO:2000070	BP	regulation of response to water deprivation	1.53465e-05	0.000530652	2.19624	33
GO:0006720	BP	isoprenoid metabolic process	1.55697e-05	0.000533475	1.55349	94
GO:0031407	BP	oxylipin metabolic process	1.71452e-05	0.000582164	2.31854	29
GO:0009068	BP	aspartate family amino acid catabolic process	1.81537e-05	0.000610903	3.59107	14
GO:0009873	BP	ethylene-activated signaling pathway	1.8693e-05	0.000623485	1.5583	91
GO:0051562	BP	negative regulation of mitochondrial calcium ion concentration	1.97423e-05	0.000630581	10.2602	5
GO:0010133	BP	proline catabolic process to glutamate	1.97423e-05	0.000630581	10.2602	5
GO:0006562	BP	proline catabolic process	1.97423e-05	0.000630581	10.2602	5
GO:0019483	BP	beta-alanine biosynthetic process	1.93864e-05	0.000630581	8.20817	6
GO:0019482	BP	beta-alanine metabolic process	1.93864e-05	0.000630581	8.20817	6
GO:0009743	BP	response to carbohydrate	2.07117e-05	0.000655985	1.94642	43
GO:0006560	BP	proline metabolic process	2.5898e-05	0.000813414	4.23234	11
GO:0010817	BP	regulation of hormone levels	2.68039e-05	0.000834908	1.36012	172
GO:0080151	BP	positive regulation of salicylic acid mediated signaling pathway	2.86847e-05	0.000886168	4.56009	10
GO:0043094	BP	cellular metabolic compound salvage	3.07078e-05	0.000940957	1.88453	45
GO:0080167	BP	response to karrikin	3.32318e-05	0.00101009	1.99943	38
GO:0009410	BP	response to xenobiotic stimulus	3.55796e-05	0.0010728	3.24007	15
GO:0009070	BP	serine family amino acid biosynthetic process	3.84617e-05	0.00115049	2.3861	25
GO:0010038	BP	response to metal ion	4.0353e-05	0.00119756	1.45684	113
GO:0006812	BP	cation transport	4.10708e-05	0.00120934	1.39056	144
GO:0006167	BP	AMP biosynthetic process	4.35122e-05	0.00126152	4.81784	9
GO:0046033	BP	AMP metabolic process	4.35122e-05	0.00126152	4.81784	9
GO:0033388	BP	putrescine biosynthetic process from arginine	4.51109e-05	0.00129788	7.38735	6
GO:0015994	BP	chlorophyll metabolic process	4.55357e-05	0.00130018	2.20405	29
GO:0046283	BP	anthocyanin-containing compound metabolic process	4.76806e-05	0.00135119	2.10691	32
GO:0000302	BP	response to reactive oxygen species	4.88595e-05	0.00137427	1.67403	62
GO:0016114	BP	terpenoid biosynthetic process	5.24428e-05	0.00145727	1.60989	71
GO:0010035	BP	response to inorganic substance	5.25838e-05	0.00145727	1.24052	307
GO:0042537	BP	benzene-containing compound metabolic process	5.71464e-05	0.00157215	2.01369	35
GO:0010731	BP	protein glutathionylation	6.28354e-05	0.00171136	5.18411	8
GO:0009755	BP	hormone-mediated signaling pathway	6.31146e-05	0.00171136	1.23643	309
GO:0042446	BP	hormone biosynthetic process	6.78406e-05	0.00182636	1.54138	82
GO:0009808	BP	lignin metabolic process	7.25118e-05	0.00193828	1.69108	57
GO:0015714	BP	phosphoenolpyruvate transport	8.31978e-05	0.00213315	5.74572	7
GO:0015717	BP	triose phosphate transport	8.31978e-05	0.00213315	5.74572	7
GO:0035436	BP	triose phosphate transmembrane transport	8.31978e-05	0.00213315	5.74572	7
GO:2001025	BP	positive regulation of response to drug	8.14385e-05	0.00213315	4.10408	10
GO:2001040	BP	positive regulation of cellular response to drug	8.14385e-05	0.00213315	4.10408	10
GO:0016054	BP	organic acid catabolic process	8.29241e-05	0.00213315	1.58652	71
GO:0031669	BP	cellular response to nutrient levels	8.82798e-05	0.00224815	1.83193	43
GO:0010218	BP	response to far red light	0.000100719	0.00254771	2.67013	18
GO:0008202	BP	steroid metabolic process	0.000107439	0.00269959	1.65096	59
GO:0044282	BP	small molecule catabolic process	0.000117536	0.00293373	1.48203	91
GO:0031667	BP	response to nutrient levels	0.000121048	0.00300152	1.67617	55
GO:0009695	BP	jasmonic acid biosynthetic process	0.000123124	0.00303304	2.71829	17
GO:0006714	BP	sesquiterpenoid metabolic process	0.000130714	0.00319909	2.54275	19
GO:0006576	BP	cellular biogenic amine metabolic process	0.000142181	0.00343513	1.82239	41
GO:0044106	BP	cellular amine metabolic process	0.000142181	0.00343513	1.82239	41
GO:0009113	BP	purine nucleobase biosynthetic process	0.000145921	0.00345898	4.69038	8
GO:0061408	BP	positive regulation of transcription from RNA polymerase II promoter in response to heat stress	0.000145621	0.00345898	2.68344	17
GO:0009744	BP	response to sucrose	0.000145173	0.00345898	1.98986	32
GO:0009073	BP	aromatic amino acid family biosynthetic process	0.000152199	0.00358525	2.0639	29
GO:0019184	BP	nonribosomal peptide biosynthetic process	0.000160252	0.00375149	7.69516	5
GO:0072330	BP	monocarboxylic acid biosynthetic process	0.000162088	0.00377106	1.36246	136
GO:0044209	BP	AMP salvage	0.00017202	0.00397757	6.15613	6
GO:0070297	BP	regulation of phosphorelay signal transduction system	0.000189641	0.00433185	2.54736	18
GO:0010104	BP	regulation of ethylene-activated signaling pathway	0.000189641	0.00433185	2.54736	18
GO:1905582	BP	response to mannose	0.000200122	0.00451653	3.73099	10
GO:0048364	BP	root development	0.000199979	0.00451653	1.48026	85
GO:0046395	BP	carboxylic acid catabolic process	0.000204673	0.00459175	1.55027	69
GO:0019695	BP	choline metabolic process	0.000217364	0.00473553	5.06975	7
GO:1902456	BP	regulation of stomatal opening	0.000217364	0.00473553	5.06975	7
GO:0009687	BP	abscisic acid metabolic process	0.000215378	0.00473553	2.79824	15
GO:1902644	BP	tertiary alcohol metabolic process	0.000215378	0.00473553	2.79824	15
GO:0043288	BP	apocarotenoid metabolic process	0.000215378	0.00473553	2.79824	15
GO:0036003	BP	positive regulation of transcription from RNA polymerase II promoter in response to stress	0.000236021	0.00511243	2.58405	17
GO:0071248	BP	cellular response to metal ion	0.00024087	0.00518765	2.13754	25
GO:0009074	BP	aromatic amino acid family catabolic process	0.000243968	0.00522451	2.36774	20
GO:0080187	BP	floral organ senescence	0.000252624	0.00537933	3.38587	11
GO:0008299	BP	isoprenoid biosynthetic process	0.000257974	0.00546238	1.50007	77
GO:0098754	BP	detoxification	0.000261717	0.00551068	1.97523	30
GO:0034605	BP	cellular response to heat	0.000266384	0.00557779	1.86549	35
GO:0009803	BP	cinnamic acid metabolic process	0.000310357	0.00639407	2.82576	14
GO:0009800	BP	cinnamic acid biosynthetic process	0.000310357	0.00639407	2.82576	14
GO:0009607	BP	response to biotic stimulus	0.000310458	0.00639407	1.17246	423
GO:1900367	BP	positive regulation of defense response to insect	0.000336334	0.00688937	6.84014	5
GO:0015812	BP	gamma-aminobutyric acid transport	0.000340669	0.00694045	3.82104	9
GO:0098661	BP	inorganic anion transmembrane transport	0.000342906	0.00694846	2.59205	16
GO:0050896	BP	response to stimulus	0.000366128	0.00737935	1.0715	1671
GO:0016131	BP	brassinosteroid metabolic process	0.000396078	0.00794052	2.14532	23
GO:0006526	BP	arginine biosynthetic process	0.000402033	0.00801726	3.22464	11
GO:0010119	BP	regulation of stomatal movement	0.000406997	0.00807353	1.73472	41
GO:0033014	BP	tetrapyrrole biosynthetic process	0.000413252	0.0081547	2.0026	27
GO:0031028	BP	septation initiation signaling	0.000535539	0.00834069	12.3123	3
GO:2000124	BP	regulation of endocannabinoid signaling pathway	0.000535539	0.00834069	12.3123	3
GO:1902317	BP	nuclear DNA replication termination	0.000535539	0.00834069	12.3123	3
GO:1902294	BP	cell cycle DNA replication termination	0.000535539	0.00834069	12.3123	3
GO:1990822	BP	basic amino acid transmembrane transport	0.000535539	0.00834069	12.3123	3
GO:0034487	BP	vacuolar amino acid transmembrane transport	0.000535539	0.00834069	12.3123	3
GO:0031991	BP	regulation of actomyosin contractile ring contraction	0.000535539	0.00834069	12.3123	3
GO:1902979	BP	mitotic DNA replication termination	0.000535539	0.00834069	12.3123	3
GO:0005993	BP	trehalose catabolic process	0.000535539	0.00834069	12.3123	3
GO:1901893	BP	positive regulation of cell septum assembly	0.000535539	0.00834069	12.3123	3
GO:0071171	BP	site-specific DNA replication termination at RTS1 barrier	0.000535539	0.00834069	12.3123	3
GO:0060292	BP	long-term synaptic depression	0.000535539	0.00834069	12.3123	3
GO:0071327	BP	cellular response to trehalose stimulus	0.000535539	0.00834069	12.3123	3
GO:0071435	BP	potassium ion export	0.000535539	0.00834069	12.3123	3
GO:0071918	BP	urea transmembrane transport	0.000535539	0.00834069	12.3123	3
GO:0051930	BP	regulation of sensory perception of pain	0.000535539	0.00834069	12.3123	3
GO:0090377	BP	seed trichome initiation	0.000535539	0.00834069	12.3123	3
GO:0034488	BP	basic amino acid transmembrane export from vacuole	0.000535539	0.00834069	12.3123	3
GO:0097370	BP	protein O-GlcNAcylation via threonine	0.000535539	0.00834069	12.3123	3
GO:0006274	BP	DNA replication termination	0.000535539	0.00834069	12.3123	3
GO:0097623	BP	potassium ion export across plasma membrane	0.000535539	0.00834069	12.3123	3
GO:0097756	BP	negative regulation of blood vessel diameter	0.000535539	0.00834069	12.3123	3
GO:0071170	BP	site-specific DNA replication termination	0.000535539	0.00834069	12.3123	3
GO:0110127	BP	phloem unloading	0.000535539	0.00834069	12.3123	3
GO:0110128	BP	phloem sucrose unloading	0.000535539	0.00834069	12.3123	3
GO:1900160	BP	plastid DNA packaging	0.000535539	0.00834069	12.3123	3
GO:0042337	BP	cuticle development involved in chitin-based cuticle molting cycle	0.000535539	0.00834069	12.3123	3
GO:0036385	BP	nucleoid DNA packaging	0.000535539	0.00834069	12.3123	3
GO:0051931	BP	regulation of sensory perception	0.000535539	0.00834069	12.3123	3
GO:0019419	BP	sulfate reduction	0.000535539	0.00834069	12.3123	3
GO:0010273	BP	detoxification of copper ion	0.000535539	0.00834069	12.3123	3
GO:0019424	BP	sulfide oxidation, using siroheme sulfite reductase	0.000535539	0.00834069	12.3123	3
GO:0010353	BP	response to trehalose	0.000535539	0.00834069	12.3123	3
GO:0006750	BP	glutathione biosynthetic process	0.000535539	0.00834069	12.3123	3
GO:0008363	BP	larval chitin-based cuticle development	0.000535539	0.00834069	12.3123	3
GO:0010618	BP	aerenchyma formation	0.000535539	0.00834069	12.3123	3
GO:0018243	BP	protein O-linked glycosylation via threonine	0.000535539	0.00834069	12.3123	3
GO:0010973	BP	positive regulation of division septum assembly	0.000535539	0.00834069	12.3123	3
GO:0019418	BP	sulfide oxidation	0.000535539	0.00834069	12.3123	3
GO:0006212	BP	uracil catabolic process	0.000484755	0.00834069	5.27668	6
GO:0015976	BP	carbon utilization	0.000487046	0.00834069	4.53609	7
GO:0006528	BP	asparagine metabolic process	0.00043862	0.00834069	3.42007	10
GO:0010072	BP	primary shoot apical meristem specification	0.00043862	0.00834069	3.42007	10
GO:0015908	BP	fatty acid transport	0.000435671	0.00834069	3.01525	12
GO:0006596	BP	polyamine biosynthetic process	0.000447128	0.00834069	2.8582	13
GO:0009069	BP	serine family amino acid metabolic process	0.000530308	0.00834069	2.00074	26
GO:0006779	BP	porphyrin-containing compound biosynthetic process	0.000530308	0.00834069	2.00074	26
GO:0009637	BP	response to blue light	0.00050287	0.00834069	1.8802	31
GO:0048544	BP	recognition of pollen	0.000508717	0.00834069	1.49176	71
GO:0051186	BP	cofactor metabolic process	0.000529949	0.00834069	1.2328	235
GO:0007165	BP	signal transduction	0.000428777	0.00834069	1.15898	462
GO:0016106	BP	sesquiterpenoid biosynthetic process	0.000541191	0.00838108	2.49362	16
GO:0032787	BP	monocarboxylic acid metabolic process	0.00054258	0.00838108	1.26382	190
GO:0035150	BP	regulation of tube size	0.000570319	0.00842953	8.20817	4
GO:0035296	BP	regulation of tube diameter	0.000570319	0.00842953	8.20817	4
GO:0010597	BP	green leaf volatile biosynthetic process	0.000570319	0.00842953	8.20817	4
GO:0097746	BP	regulation of blood vessel diameter	0.000570319	0.00842953	8.20817	4
GO:0003018	BP	vascular process in circulatory system	0.000570319	0.00842953	8.20817	4
GO:1901891	BP	regulation of cell septum assembly	0.000570319	0.00842953	8.20817	4
GO:0019372	BP	lipoxygenase pathway	0.000570319	0.00842953	8.20817	4
GO:0032955	BP	regulation of division septum assembly	0.000570319	0.00842953	8.20817	4
GO:0050880	BP	regulation of blood vessel size	0.000570319	0.00842953	8.20817	4
GO:0016128	BP	phytosteroid metabolic process	0.00055893	0.00842953	2.02504	25
GO:0019722	BP	calcium-mediated signaling	0.000550938	0.00842953	1.96705	27
GO:0080051	BP	cutin transport	0.000590976	0.00870073	3.57453	9
GO:0010275	BP	NAD(P)H dehydrogenase complex assembly	0.000627557	0.00920336	6.15613	5
GO:0015743	BP	malate transport	0.000643855	0.00940577	2.897	12
GO:0009620	BP	response to fungus	0.000648534	0.00941339	1.30016	149
GO:0035556	BP	intracellular signal transduction	0.000649372	0.00941339	1.2535	197
GO:0009639	BP	response to red or far red light	0.000669298	0.00966508	1.64896	45
GO:0006836	BP	neurotransmitter transport	0.000679679	0.00977752	2.52992	15
GO:0002239	BP	response to oomycetes	0.000717533	0.0102828	1.49652	66
GO:0019344	BP	cysteine biosynthetic process	0.000726673	0.0103744	2.61169	14
GO:0006166	BP	purine ribonucleoside salvage	0.000752459	0.0106617	4.9249	6
GO:2000469	BP	negative regulation of peroxidase activity	0.000752459	0.0106617	4.9249	6
GO:1902223	BP	erythrose 4-phosphate/phosphoenolpyruvate family amino acid biosynthetic process	0.000775306	0.0108629	3.78839	8
GO:2000035	BP	regulation of stem cell division	0.000775306	0.0108629	3.78839	8
GO:0009094	BP	L-phenylalanine biosynthetic process	0.000775306	0.0108629	3.78839	8
GO:0090333	BP	regulation of stomatal closure	0.000834786	0.01161	2.03728	23
GO:0016101	BP	diterpenoid metabolic process	0.000832239	0.01161	1.72558	37
GO:0008037	BP	cell recognition	0.000886596	0.0122852	1.46182	71
GO:0001666	BP	response to hypoxia	0.000907265	0.0124878	1.96055	25
GO:0008610	BP	lipid biosynthetic process	0.000907842	0.0124878	1.22791	222
GO:0009688	BP	abscisic acid biosynthetic process	0.000929519	0.0126475	2.78768	12
GO:0043289	BP	apocarotenoid biosynthetic process	0.000929519	0.0126475	2.78768	12
GO:1902645	BP	tertiary alcohol biosynthetic process	0.000929519	0.0126475	2.78768	12
GO:0015893	BP	drug transport	0.000933537	0.0126565	1.61357	46
GO:0042762	BP	regulation of sulfur metabolic process	0.000992271	0.0134046	2.53488	14
GO:0006857	BP	oligopeptide transport	0.00101978	0.013727	2.00838	23
GO:1902222	BP	erythrose 4-phosphate/phosphoenolpyruvate family amino acid catabolic process	0.00105371	0.01394	2.43005	15
GO:0006559	BP	L-phenylalanine catabolic process	0.00105371	0.01394	2.43005	15
GO:0043620	BP	regulation of DNA-templated transcription in response to stress	0.00104923	0.01394	2.1228	20
GO:0019932	BP	second-messenger-mediated signaling	0.00104878	0.01394	1.86348	28
GO:0001505	BP	regulation of neurotransmitter levels	0.0010541	0.01394	1.81954	30
GO:0005991	BP	trehalose metabolic process	0.00106027	0.0139726	2.62392	13
GO:0042450	BP	arginine biosynthetic process via ornithine	0.00107353	0.0140491	5.59648	5
GO:0006542	BP	glutamine biosynthetic process	0.00107353	0.0140491	5.59648	5
GO:0006535	BP	cysteine biosynthetic process from serine	0.00108393	0.0140874	3.07806	10
GO:0051707	BP	response to other organism	0.0010817	0.0140874	1.15942	394
GO:0006595	BP	polyamine metabolic process	0.00108875	0.0141014	2.34519	16
GO:0009641	BP	shade avoidance	0.00112143	0.0144749	4.6171	6
GO:0019725	BP	cellular homeostasis	0.00113423	0.0145901	1.33621	112
GO:0015802	BP	basic amino acid transport	0.00133212	0.0170566	3.51779	8
GO:0006536	BP	glutamate metabolic process	0.00133502	0.0170566	2.46245	14
GO:0046165	BP	alcohol biosynthetic process	0.00134302	0.0171009	1.81246	29
GO:0006308	BP	DNA catabolic process	0.00134937	0.0171238	2.82156	11
GO:0009966	BP	regulation of signal transduction	0.00138731	0.0175462	1.25758	167
GO:0009742	BP	brassinosteroid mediated signaling pathway	0.00139269	0.0175553	1.64163	40
GO:0009690	BP	cytokinin metabolic process	0.00144733	0.0181832	1.99169	22
GO:0019860	BP	uracil metabolic process	0.00161455	0.0200173	4.3455	6
GO:0032328	BP	alanine transport	0.00161455	0.0200173	4.3455	6
GO:0015808	BP	L-alanine transport	0.00161455	0.0200173	4.3455	6
GO:0006208	BP	pyrimidine nucleobase catabolic process	0.00161455	0.0200173	4.3455	6
GO:0043207	BP	response to external biotic stimulus	0.0016362	0.0202191	1.15138	398
GO:0044272	BP	sulfur compound biosynthetic process	0.00169692	0.0209009	1.55115	48
GO:0010117	BP	photoprotection	0.00170981	0.020923	3.39648	8
GO:0008295	BP	spermidine biosynthetic process	0.00170981	0.020923	3.39648	8
GO:0006842	BP	tricarboxylic acid transport	0.00171747	0.0209487	5.13011	5
GO:0009640	BP	photomorphogenesis	0.0017536	0.0213204	1.96282	22
GO:0009112	BP	nucleobase metabolic process	0.00183428	0.0222295	1.89419	24
GO:0048878	BP	chemical homeostasis	0.00189309	0.0228687	1.27462	141
GO:0035435	BP	phosphate ion transmembrane transport	0.0019053	0.0229427	3.07806	9
GO:0110020	BP	regulation of actomyosin structure organization	0.00201173	0.0241471	9.23419	3
GO:0050832	BP	defense response to fungus	0.00211002	0.0252465	1.29273	124
GO:0006778	BP	porphyrin-containing compound metabolic process	0.00220736	0.0262904	1.71928	31
GO:0010646	BP	regulation of cell communication	0.00221121	0.0262904	1.23993	171
GO:0089718	BP	amino acid import across plasma membrane	0.00225645	0.0264939	4.10408	6
GO:0098712	BP	L-glutamate import across plasma membrane	0.00225645	0.0264939	4.10408	6
GO:2000468	BP	regulation of peroxidase activity	0.00225645	0.0264939	4.10408	6
GO:0001504	BP	neurotransmitter uptake	0.00225645	0.0264939	4.10408	6
GO:0071497	BP	cellular response to freezing	0.00232941	0.0270974	6.15613	4
GO:0015801	BP	aromatic amino acid transport	0.00232941	0.0270974	6.15613	4
GO:0015827	BP	tryptophan transport	0.00232941	0.0270974	6.15613	4
GO:0050801	BP	ion homeostasis	0.00242699	0.0281456	1.33829	95
GO:0034284	BP	response to monosaccharide	0.00247964	0.028668	1.94404	21
GO:0023051	BP	regulation of signaling	0.00250512	0.0288226	1.2386	168
GO:0042742	BP	defense response to bacterium	0.00250831	0.0288226	1.22042	192
GO:0032467	BP	positive regulation of cytokinesis	0.00260498	0.0296622	4.73548	5
GO:0055129	BP	L-proline biosynthetic process	0.00260498	0.0296622	4.73548	5
GO:0033577	BP	protein glycosylation in endoplasmic reticulum	0.00260498	0.0296622	4.73548	5
GO:0006081	BP	cellular aldehyde metabolic process	0.00265789	0.0301735	1.65461	34
GO:0006690	BP	icosanoid metabolic process	0.0026708	0.030229	2.60452	11
GO:0033013	BP	tetrapyrrole metabolic process	0.00272008	0.0306945	1.69636	31
GO:0006855	BP	drug transmembrane transport	0.00273758	0.0307998	1.63851	35
GO:0009733	BP	response to auxin	0.00289452	0.0323723	1.41897	65
GO:0065008	BP	regulation of biological quality	0.0028921	0.0323723	1.1419	395
GO:1903173	BP	fatty alcohol metabolic process	0.0030132	0.0334022	3.44743	7
GO:0033306	BP	phytol metabolic process	0.0030132	0.0334022	3.44743	7
GO:0006591	BP	ornithine metabolic process	0.0030132	0.0334022	3.44743	7
GO:0009593	BP	detection of chemical stimulus	0.0030731	0.0336701	3.88808	6
GO:0000103	BP	sulfate assimilation	0.0030731	0.0336701	3.88808	6
GO:0033273	BP	response to vitamin	0.0030731	0.0336701	3.88808	6
GO:0006694	BP	steroid biosynthetic process	0.00305762	0.0336701	1.56286	41
GO:0006566	BP	threonine metabolic process	0.00312686	0.0341598	2.55537	11
GO:0006873	BP	cellular ion homeostasis	0.00315116	0.0343257	1.49059	50
GO:0042939	BP	tripeptide transport	0.00328579	0.0356892	2.01473	18
GO:0000097	BP	sulfur amino acid biosynthetic process	0.00329563	0.0356932	1.86807	22
GO:0009446	BP	putrescine biosynthetic process	0.0033663	0.0359421	3.07806	8
GO:0046835	BP	carbohydrate phosphorylation	0.0033663	0.0359421	3.07806	8
GO:0009445	BP	putrescine metabolic process	0.0033663	0.0359421	3.07806	8
GO:0009635	BP	response to herbicide	0.00334345	0.0359421	2.17275	15
GO:0006534	BP	cysteine metabolic process	0.00334345	0.0359421	2.17275	15
GO:0010207	BP	photosystem II assembly	0.00343737	0.0365974	2.84129	9
GO:0009409	BP	response to cold	0.00345386	0.0366693	1.28073	119
GO:0046083	BP	adenine metabolic process	0.00392387	0.039543	5.47211	4
GO:0015744	BP	succinate transport	0.00392387	0.039543	5.47211	4
GO:0003032	BP	detection of oxygen	0.00392387	0.039543	5.47211	4
GO:0046084	BP	adenine biosynthetic process	0.00392387	0.039543	5.47211	4
GO:0015840	BP	urea transport	0.00392387	0.039543	5.47211	4
GO:0043096	BP	purine nucleobase salvage	0.00392387	0.039543	5.47211	4
GO:0018158	BP	protein oxidation	0.00392387	0.039543	5.47211	4
GO:0050992	BP	dimethylallyl diphosphate biosynthetic process	0.00392387	0.039543	5.47211	4
GO:0050993	BP	dimethylallyl diphosphate metabolic process	0.00392387	0.039543	5.47211	4
GO:0018171	BP	peptidyl-cysteine oxidation	0.00392387	0.039543	5.47211	4
GO:0031539	BP	positive regulation of anthocyanin metabolic process	0.00392387	0.039543	5.47211	4
GO:0019755	BP	one-carbon compound transport	0.00392387	0.039543	5.47211	4
GO:0070483	BP	detection of hypoxia	0.00392387	0.039543	5.47211	4
GO:0006168	BP	adenine salvage	0.00392387	0.039543	5.47211	4
GO:0060776	BP	simple leaf morphogenesis	0.00378289	0.039543	4.39723	5
GO:0010325	BP	raffinose family oligosaccharide biosynthetic process	0.00383768	0.039543	3.31484	7
GO:0043647	BP	inositol phosphate metabolic process	0.00386676	0.039543	2.28656	13
GO:0009682	BP	induced systemic resistance	0.00386676	0.039543	2.28656	13
GO:0098771	BP	inorganic ion homeostasis	0.00388213	0.039543	1.35469	79
GO:0043618	BP	regulation of transcription from RNA polymerase II promoter in response to stress	0.00400326	0.0402355	1.97876	18
GO:0009617	BP	response to bacterium	0.00403546	0.0404512	1.19553	211
GO:0043480	BP	pigment accumulation in tissues	0.00409145	0.0404742	3.69368	6
GO:0043478	BP	pigment accumulation in response to UV light	0.00409145	0.0404742	3.69368	6
GO:0043479	BP	pigment accumulation in tissues in response to UV light	0.00409145	0.0404742	3.69368	6
GO:0061687	BP	detoxification of inorganic compound	0.00409145	0.0404742	3.69368	6
GO:0043481	BP	anthocyanin accumulation in tissues in response to UV light	0.00409145	0.0404742	3.69368	6
GO:0016310	BP	phosphorylation	0.00410916	0.040543	1.15194	324
GO:0008216	BP	spermidine metabolic process	0.00412063	0.04055	2.77026	9
GO:0009862	BP	systemic acquired resistance, salicylic acid mediated signaling pathway	0.00424916	0.041706	2.01258	17
GO:0010043	BP	response to zinc ion	0.00438818	0.0429416	2.25436	13
GO:1901362	BP	organic cyclic compound biosynthetic process	0.00439784	0.0429416	1.13911	371
GO:0006880	BP	intracellular sequestering of iron ion	0.00460911	0.044429	2.56505	10
GO:0071281	BP	cellular response to iron ion	0.00460911	0.044429	2.56505	10
GO:0097577	BP	sequestering of iron ion	0.00460911	0.044429	2.56505	10
GO:0002229	BP	defense response to oomycetes	0.00458612	0.044429	1.43469	55
GO:0006091	BP	generation of precursor metabolites and energy	0.00459754	0.044429	1.2792	112
GO:0009187	BP	cyclic nucleotide metabolic process	0.00472441	0.0451937	7.38735	3
GO:0008277	BP	regulation of G protein-coupled receptor signaling pathway	0.00472441	0.0451937	7.38735	3
GO:1902457	BP	negative regulation of stomatal opening	0.00472441	0.0451937	7.38735	3
GO:0009746	BP	response to hexose	0.00494274	0.0471625	1.90189	19
GO:0006563	BP	L-serine metabolic process	0.00496475	0.0472529	2.22305	13
GO:0016051	BP	carbohydrate biosynthetic process	0.00501016	0.0475649	1.27407	113
GO:0015698	BP	inorganic anion transport	0.00511366	0.0484256	1.43733	53
GO:0006468	BP	protein phosphorylation	0.00518363	0.0489652	1.15928	282
GO:0048506	BP	regulation of timing of meristematic phase transition	0.00522572	0.0489944	2.0751	15
GO:0048510	BP	regulation of timing of transition from vegetative to reproductive phase	0.00522572	0.0489944	2.0751	15
GO:0046434	BP	organophosphate catabolic process	0.0052201	0.0489944	1.50762	42
GO:0009052	BP	pentose-phosphate shunt, non-oxidative branch	0.0052981	0.0495497	4.10408	5
GO:0010452	BP	histone H3-K36 methylation	0.00533906	0.0496862	3.51779	6
GO:0051354	BP	negative regulation of oxidoreductase activity	0.00533906	0.0496862	3.51779	6
GO:0090421	BP	embryonic meristem initiation	0.00537713	0.0499172	2.5127	10
GO:0009522	CC	photosystem I	2.15161e-24	1.20921e-21	4.71006	57
GO:0044434	CC	chloroplast part	2.74638e-22	7.71734e-20	1.53402	497
GO:0044435	CC	plastid part	1.03172e-21	1.93275e-19	1.52335	498
GO:0016021	CC	integral component of membrane	3.5815e-18	5.03201e-16	1.18613	1815
GO:0031224	CC	intrinsic component of membrane	1.53418e-17	1.72442e-15	1.17716	1879
GO:0009521	CC	photosystem	5.6573e-17	5.29901e-15	3.0556	68
GO:0044425	CC	membrane part	2.34998e-13	1.8867e-11	1.14038	2026
GO:0009523	CC	photosystem II	3.68552e-13	2.58908e-11	3.06305	51
GO:0044436	CC	thylakoid part	5.53662e-13	3.45731e-11	1.64011	215
GO:0031969	CC	chloroplast membrane	1.89992e-11	1.06776e-09	1.82455	131
GO:0042170	CC	plastid membrane	2.76743e-11	1.4139e-09	1.80114	134
GO:0009654	CC	photosystem II oxygen evolving complex	1.27932e-10	5.99146e-09	4.3353	25
GO:0010287	CC	plastoglobule	1.83555e-10	7.93524e-09	2.81244	45
GO:0055035	CC	plastid thylakoid membrane	8.48462e-10	2.80492e-08	1.56412	187
GO:0009535	CC	chloroplast thylakoid membrane	8.48462e-10	2.80492e-08	1.56412	187
GO:0034357	CC	photosynthetic membrane	7.78608e-10	2.80492e-08	1.56176	189
GO:0042651	CC	thylakoid membrane	7.78608e-10	2.80492e-08	1.56176	189
GO:0031977	CC	thylakoid lumen	1.49964e-09	4.6822e-08	2.78896	41
GO:0009543	CC	chloroplast thylakoid lumen	4.11724e-09	1.15694e-07	2.91606	36
GO:0031978	CC	plastid thylakoid lumen	4.11724e-09	1.15694e-07	2.91606	36
GO:0009534	CC	chloroplast thylakoid	1.25296e-07	3.20074e-06	2.15568	52
GO:0031976	CC	plastid thylakoid	1.25296e-07	3.20074e-06	2.15568	52
GO:0009570	CC	chloroplast stroma	1.43588e-07	3.50854e-06	1.50629	161
GO:0009532	CC	plastid stroma	2.00296e-07	4.69025e-06	1.49832	161
GO:0098807	CC	chloroplast thylakoid membrane protein complex	4.43468e-07	9.96917e-06	5.47211	12
GO:0009536	CC	plastid	2.00281e-06	4.32915e-05	1.20498	551
GO:0009579	CC	thylakoid	2.53337e-06	5.27317e-05	1.68078	83
GO:0009507	CC	chloroplast	4.2807e-06	8.59198e-05	1.20103	533
GO:0005886	CC	plasma membrane	4.887e-06	9.47067e-05	1.12417	1133
GO:0016020	CC	membrane	4.06528e-05	0.000761562	1.07397	1988
GO:0009526	CC	plastid envelope	0.000301042	0.0054576	1.3936	109
GO:0009941	CC	chloroplast envelope	0.000375721	0.0065986	1.38967	107
GO:0009783	CC	photosystem II antenna complex	0.000535539	0.00771725	12.3123	3
GO:0071628	CC	intrinsic component of fungal-type vacuolar membrane	0.000535539	0.00771725	12.3123	3
GO:0009517	CC	PSII associated light-harvesting complex II	0.000535539	0.00771725	12.3123	3
GO:0009503	CC	thylakoid light-harvesting complex	0.000535539	0.00771725	12.3123	3
GO:0046862	CC	chromoplast membrane	0.000535539	0.00771725	12.3123	3
GO:0071627	CC	integral component of fungal-type vacuolar membrane	0.000535539	0.00771725	12.3123	3
GO:0030076	CC	light-harvesting complex	0.000535539	0.00771725	12.3123	3
GO:0005773	CC	vacuole	0.000762823	0.0107177	1.24203	207
GO:0005887	CC	integral component of plasma membrane	0.000866311	0.0118748	1.45081	74
GO:0010319	CC	stromule	0.000929519	0.0124379	2.78768	12
GO:0016602	CC	CCAAT-binding factor complex	0.00112143	0.0146568	4.6171	6
GO:0031975	CC	envelope	0.00219145	0.0273687	1.28849	126
GO:0031967	CC	organelle envelope	0.00219145	0.0273687	1.28849	126
GO:0004364	MF	glutathione transferase activity	6.78779e-28	1.12406e-24	3.4517	97
GO:0003700	MF	DNA-binding transcription factor activity	4.07461e-27	3.37378e-24	1.57671	544
GO:0003824	MF	catalytic activity	5.33437e-24	2.94457e-21	1.12432	3400
GO:0016491	MF	oxidoreductase activity	1.90587e-22	7.89031e-20	1.36714	857
GO:0016765	MF	transferase activity, transferring alkyl or aryl (other than methyl) groups	5.47119e-21	1.51005e-18	2.45078	126
GO:0140110	MF	transcription regulator activity	4.74891e-21	1.51005e-18	1.47651	552
GO:0022857	MF	transmembrane transporter activity	1.10773e-20	2.62056e-18	1.4718	550
GO:0046943	MF	carboxylic acid transmembrane transporter activity	1.71129e-19	2.8339e-17	2.6273	102
GO:0005342	MF	organic acid transmembrane transporter activity	1.71129e-19	2.8339e-17	2.6273	102
GO:0016758	MF	transferase activity, transferring hexosyl groups	1.4474e-19	2.8339e-17	1.72408	283
GO:0008509	MF	anion transmembrane transporter activity	9.8386e-19	1.48116e-16	2.08727	158
GO:0016757	MF	transferase activity, transferring glycosyl groups	1.25358e-17	1.72994e-15	1.60573	325
GO:0048037	MF	cofactor binding	3.85394e-17	4.90932e-15	1.3838	614
GO:0016168	MF	chlorophyll binding	7.61656e-17	9.00931e-15	3.6585	52
GO:0004497	MF	monooxygenase activity	1.11099e-16	1.22653e-14	1.6729	264
GO:0015318	MF	inorganic molecular entity transmembrane transporter activity	1.44546e-16	1.40805e-14	1.55245	347
GO:0005215	MF	transporter activity	1.41318e-16	1.40805e-14	1.39565	567
GO:0016984	MF	ribulose-bisphosphate carboxylase activity	1.58876e-16	1.46166e-14	7.65356	23
GO:0008514	MF	organic anion transmembrane transporter activity	2.21826e-16	1.93339e-14	2.28538	111
GO:0015075	MF	ion transmembrane transporter activity	1.06919e-15	8.85292e-14	1.53402	344
GO:0015291	MF	secondary active transmembrane transporter activity	1.81671e-13	1.4326e-11	1.67673	207
GO:0035251	MF	UDP-glucosyltransferase activity	4.48705e-13	3.37753e-11	1.88788	138
GO:0015171	MF	amino acid transmembrane transporter activity	5.03594e-13	3.62587e-11	2.63255	65
GO:0046527	MF	glucosyltransferase activity	8.24424e-13	5.68852e-11	1.79316	157
GO:0008194	MF	UDP-glycosyltransferase activity	1.60275e-12	1.06166e-10	1.70246	181
GO:0015926	MF	glucosidase activity	4.49196e-12	2.86103e-10	2.1332	92
GO:0050306	MF	sucrose 1F-fructosyltransferase activity	7.5901e-12	4.489e-10	6.00598	20
GO:0050738	MF	fructosyltransferase activity	7.5901e-12	4.489e-10	6.00598	20
GO:0016740	MF	transferase activity	3.36171e-11	1.91965e-09	1.15411	1540
GO:0022804	MF	active transmembrane transporter activity	4.31568e-11	2.38226e-09	1.47121	282
GO:0016620	MF	oxidoreductase activity, acting on the aldehyde or oxo group of donors, NAD or NADP as acceptor	6.20256e-11	3.31337e-09	2.58463	55
GO:0004575	MF	sucrose alpha-glucosidase activity	1.37526e-10	7.11699e-09	4.47718	24
GO:0015293	MF	symporter activity	2.42568e-10	1.21725e-08	1.79676	122
GO:0015175	MF	neutral amino acid transmembrane transporter activity	1.72685e-09	8.4108e-08	4.16444	23
GO:0016903	MF	oxidoreductase activity, acting on the aldehyde or oxo group of donors	2.2853e-09	1.08127e-07	2.18064	65
GO:0016705	MF	oxidoreductase activity, acting on paired donors, with incorporation or reduction of molecular oxygen	2.55076e-09	1.17335e-07	1.44919	248
GO:0016829	MF	lyase activity	9.22988e-09	4.131e-07	1.52342	183
GO:0005310	MF	dicarboxylic acid transmembrane transporter activity	1.1262e-08	4.90787e-07	3.39215	27
GO:0016798	MF	hydrolase activity, acting on glycosyl bonds	1.17781e-08	5.00115e-07	1.47605	208
GO:0004553	MF	hydrolase activity, hydrolyzing O-glycosyl compounds	1.36878e-08	5.66675e-07	1.50246	190
GO:0050662	MF	coenzyme binding	1.68012e-08	6.78604e-07	1.43208	236
GO:0008798	MF	beta-aspartyl-peptidase activity	1.8666e-08	7.35975e-07	7.52416	11
GO:0004067	MF	asparaginase activity	2.68134e-08	1.03263e-06	9.23419	9
GO:0030246	MF	carbohydrate binding	3.12399e-08	1.17576e-06	1.38817	268
GO:0005506	MF	iron ion binding	5.25394e-08	1.93345e-06	1.42041	229
GO:0046906	MF	tetrapyrrole binding	6.32969e-08	2.27869e-06	1.35009	301
GO:0004674	MF	protein serine/threonine kinase activity	1.00395e-07	3.53732e-06	1.22951	572
GO:0050502	MF	cis-zeatin O-beta-D-glucosyltransferase activity	1.07905e-07	3.72273e-06	3.96496	19
GO:0090599	MF	alpha-glucosidase activity	1.61106e-07	5.44473e-06	3.17326	25
GO:0004564	MF	beta-fructofuranosidase activity	2.3973e-07	7.93985e-06	2.897	28
GO:0008422	MF	beta-glucosidase activity	2.64729e-07	8.59591e-06	1.90954	67
GO:0046873	MF	metal ion transmembrane transporter activity	3.21204e-07	1.02291e-05	1.67286	100
GO:0015301	MF	anion:anion antiporter activity	3.43054e-07	1.07188e-05	3.44743	21
GO:0016774	MF	phosphotransferase activity, carboxyl group as acceptor	4.57952e-07	1.37885e-05	4.19141	16
GO:0043565	MF	sequence-specific DNA binding	4.57075e-07	1.37885e-05	1.31404	311
GO:0005385	MF	zinc ion transmembrane transporter activity	5.17013e-07	1.50206e-05	3.26349	22
GO:0072509	MF	divalent inorganic cation transmembrane transporter activity	5.17013e-07	1.50206e-05	3.26349	22
GO:0016830	MF	carbon-carbon lyase activity	5.39092e-07	1.5392e-05	1.81942	73
GO:0016616	MF	oxidoreductase activity, acting on the CH-OH group of donors, NAD or NADP as acceptor	6.26398e-07	1.75816e-05	1.62326	106
GO:0015355	MF	secondary active monocarboxylate transmembrane transporter activity	7.22178e-07	1.86864e-05	9.5762	7
GO:0089721	MF	phosphoenolpyruvate transmembrane transporter activity	7.22178e-07	1.86864e-05	9.5762	7
GO:0008883	MF	glutamyl-tRNA reductase activity	7.22178e-07	1.86864e-05	9.5762	7
GO:0015121	MF	phosphoenolpyruvate:phosphate antiporter activity	7.22178e-07	1.86864e-05	9.5762	7
GO:0009670	MF	triose-phosphate:phosphate antiporter activity	7.22178e-07	1.86864e-05	9.5762	7
GO:0052747	MF	sinapyl alcohol dehydrogenase activity	8.71772e-07	2.18736e-05	4.02033	16
GO:0045551	MF	cinnamyl-alcohol dehydrogenase activity	8.71772e-07	2.18736e-05	4.02033	16
GO:0080044	MF	quercetin 7-O-glucosyltransferase activity	1.13931e-06	2.81596e-05	2.05905	49
GO:0080043	MF	quercetin 3-O-glucosyltransferase activity	1.26029e-06	3.06917e-05	2.05204	49
GO:0016628	MF	oxidoreductase activity, acting on the CH-CH group of donors, NAD or NADP as acceptor	1.35031e-06	3.24074e-05	2.34519	36
GO:0015295	MF	solute:proton symporter activity	1.52116e-06	3.59863e-05	1.72765	79
GO:0016629	MF	12-oxophytodienoate reductase activity	1.62607e-06	3.68873e-05	4.30929	14
GO:0015180	MF	L-alanine transmembrane transporter activity	1.62607e-06	3.68873e-05	4.30929	14
GO:0022858	MF	alanine transmembrane transporter activity	1.62607e-06	3.68873e-05	4.30929	14
GO:1900750	MF	oligopeptide binding	1.68485e-06	3.72014e-05	2.897	24
GO:0043295	MF	glutathione binding	1.68485e-06	3.72014e-05	2.897	24
GO:0008028	MF	monocarboxylic acid transmembrane transporter activity	1.8063e-06	3.93583e-05	2.58736	29
GO:0016301	MF	kinase activity	1.92642e-06	4.14305e-05	1.18332	662
GO:0015294	MF	solute:cation symporter activity	2.2399e-06	4.75549e-05	1.70412	80
GO:0008324	MF	cation transmembrane transporter activity	2.54949e-06	5.34424e-05	1.36037	217
GO:0016773	MF	phosphotransferase activity, alcohol group as acceptor	2.65098e-06	5.48753e-05	1.18473	637
GO:0016831	MF	carboxy-lyase activity	2.90298e-06	5.93499e-05	2.01016	48
GO:0046915	MF	transition metal ion transmembrane transporter activity	4.01808e-06	8.11455e-05	2.16296	39
GO:0004672	MF	protein kinase activity	4.52903e-06	9.03624e-05	1.18788	592
GO:0099516	MF	ion antiporter activity	4.89758e-06	9.65523e-05	2.3855	31
GO:0080046	MF	quercetin 4'-O-glucosyltransferase activity	5.90166e-06	0.000114978	3.91754	14
GO:0015238	MF	drug transmembrane transporter activity	6.36793e-06	0.00012262	1.77075	64
GO:0000234	MF	phosphoethanolamine N-methyltransferase activity	6.94359e-06	0.0001312	9.23419	6
GO:0015172	MF	acidic amino acid transmembrane transporter activity	6.972e-06	0.0001312	3.21189	18
GO:0072341	MF	modified amino acid binding	7.74708e-06	0.000144148	2.60853	25
GO:0035673	MF	oligopeptide transmembrane transporter activity	8.03788e-06	0.000147897	1.88305	52
GO:0102483	MF	scopolin beta-glucosidase activity	9.41009e-06	0.000171243	2.31321	31
GO:0000987	MF	proximal promoter sequence-specific DNA binding	1.65337e-05	0.000297607	2.13331	35
GO:0045486	MF	naringenin 3-dioxygenase activity	1.83423e-05	0.000326612	4.36886	11
GO:0019825	MF	oxygen binding	1.93864e-05	0.000337936	8.20817	6
GO:0004724	MF	magnesium-dependent protein serine/threonine phosphatase activity	1.93201e-05	0.000337936	1.98741	41
GO:0051213	MF	dioxygenase activity	2.12917e-05	0.000367282	1.54108	94
GO:0008242	MF	omega peptidase activity	2.5898e-05	0.000437624	4.23234	11
GO:0015140	MF	malate transmembrane transporter activity	2.5898e-05	0.000437624	4.23234	11
GO:0015103	MF	inorganic anion transmembrane transporter activity	2.70046e-05	0.000451714	1.82674	50
GO:0015556	MF	C4-dicarboxylate transmembrane transporter activity	2.96275e-05	0.000490632	3.88808	12
GO:0016614	MF	oxidoreductase activity, acting on CH-OH group of donors	3.44608e-05	0.000565021	1.47052	110
GO:0042972	MF	licheninase activity	4.77311e-05	0.000774928	6.15613	7
GO:0050403	MF	trans-zeatin O-beta-D-glucosyltransferase activity	4.9311e-05	0.000792806	3.98338	11
GO:0016627	MF	oxidoreductase activity, acting on the CH-CH group of donors	5.40321e-05	0.000860357	1.87077	43
GO:0009916	MF	alternative oxidase activity	6.28354e-05	0.000981655	5.18411	8
GO:0102721	MF	ubiquinol:oxygen oxidoreductase activity	6.28354e-05	0.000981655	5.18411	8
GO:0003978	MF	UDP-glucose 4-epimerase activity	6.45976e-05	0.000999753	4.6171	9
GO:0042879	MF	aldonate transmembrane transporter activity	8.31978e-05	0.001264	5.74572	7
GO:0071917	MF	triose-phosphate transmembrane transporter activity	8.31978e-05	0.001264	5.74572	7
GO:0005509	MF	calcium ion binding	9.02453e-05	0.0013586	1.35515	152
GO:0016412	MF	serine O-acyltransferase activity	9.23847e-05	0.00136597	6.71578	6
GO:0009001	MF	serine O-acetyltransferase activity	9.23847e-05	0.00136597	6.71578	6
GO:0047769	MF	arogenate dehydratase activity	9.7259e-05	0.00141281	4.9249	8
GO:0004664	MF	prephenate dehydratase activity	9.7259e-05	0.00141281	4.9249	8
GO:0015174	MF	basic amino acid transmembrane transporter activity	0.000114464	0.00164829	3.43598	12
GO:0000014	MF	single-stranded DNA endodeoxyribonuclease activity	0.000117308	0.00167467	3.6604	11
GO:0035671	MF	enone reductase activity	0.000137513	0.00194633	5.38661	7
GO:0015120	MF	phosphoglycerate transmembrane transporter activity	0.00017202	0.00241411	6.15613	6
GO:0015297	MF	antiporter activity	0.000192707	0.00268171	1.50999	78
GO:0045548	MF	phenylalanine ammonia-lyase activity	0.000213865	0.00295133	2.92155	14
GO:0022890	MF	inorganic cation transmembrane transporter activity	0.000227783	0.00311742	1.28809	188
GO:0004029	MF	aldehyde dehydrogenase (NAD) activity	0.000230924	0.00313451	3.21189	12
GO:0043878	MF	glyceraldehyde-3-phosphate dehydrogenase (NAD+) (non-phosphorylating) activity	0.000252624	0.00340119	3.38587	11
GO:0005313	MF	L-glutamate transmembrane transporter activity	0.000258269	0.00344914	2.87286	14
GO:0016621	MF	cinnamoyl-CoA reductase activity	0.000278618	0.00369113	2.34519	20
GO:0050269	MF	coniferyl-aldehyde dehydrogenase activity	0.000297459	0.00387867	5.68258	6
GO:0004030	MF	aldehyde dehydrogenase [NAD(P)+] activity	0.000297459	0.00387867	5.68258	6
GO:0016671	MF	oxidoreductase activity, acting on a sulfur group of donors, disulfide as acceptor	0.000305569	0.0039533	2.96406	13
GO:0000978	MF	RNA polymerase II proximal promoter sequence-specific DNA binding	0.000315744	0.0040378	2.17832	23
GO:0015333	MF	peptide:proton symporter activity	0.000316977	0.0040378	1.73015	43
GO:0015181	MF	arginine transmembrane transporter activity	0.000340669	0.00427385	3.82104	9
GO:0015185	MF	gamma-aminobutyric acid transmembrane transporter activity	0.000340669	0.00427385	3.82104	9
GO:0015179	MF	L-amino acid transmembrane transporter activity	0.000391788	0.0048782	2.40892	18
GO:0004157	MF	dihydropyrimidinase activity	0.000535539	0.00575878	12.3123	3
GO:0010242	MF	oxygen evolving activity	0.000535539	0.00575878	12.3123	3
GO:0017113	MF	dihydropyrimidine dehydrogenase (NADP+) activity	0.000535539	0.00575878	12.3123	3
GO:0050311	MF	sulfite reductase (ferredoxin) activity	0.000535539	0.00575878	12.3123	3
GO:0004357	MF	glutamate-cysteine ligase activity	0.000535539	0.00575878	12.3123	3
GO:0002058	MF	uracil binding	0.000535539	0.00575878	12.3123	3
GO:0050213	MF	progesterone 5-alpha-reductase activity	0.000535539	0.00575878	12.3123	3
GO:0004657	MF	proline dehydrogenase activity	0.000535539	0.00575878	12.3123	3
GO:0015927	MF	trehalase activity	0.000535539	0.00575878	12.3123	3
GO:0016002	MF	sulfite reductase activity	0.000535539	0.00575878	12.3123	3
GO:0002061	MF	pyrimidine nucleobase binding	0.000535539	0.00575878	12.3123	3
GO:0003992	MF	N2-acetyl-L-ornithine:2-oxoglutarate 5-aminotransferase activity	0.000535539	0.00575878	12.3123	3
GO:0003939	MF	L-iditol 2-dehydrogenase activity	0.000535539	0.00575878	12.3123	3
GO:0004612	MF	phosphoenolpyruvate carboxykinase (ATP) activity	0.000535539	0.00575878	12.3123	3
GO:0004555	MF	alpha,alpha-trehalase activity	0.000535539	0.00575878	12.3123	3
GO:0097363	MF	protein O-GlcNAc transferase activity	0.000535539	0.00575878	12.3123	3
GO:0033741	MF	adenylyl-sulfate reductase (glutathione) activity	0.000535539	0.00575878	12.3123	3
GO:0002054	MF	nucleobase binding	0.000535539	0.00575878	12.3123	3
GO:0004618	MF	phosphoglycerate kinase activity	0.000484755	0.00575878	5.27668	6
GO:0045549	MF	9-cis-epoxycarotenoid dioxygenase activity	0.000487046	0.00575878	4.53609	7
GO:0015116	MF	sulfate transmembrane transporter activity	0.000500885	0.00575878	3.14965	11
GO:0015245	MF	fatty acid transmembrane transporter activity	0.000557625	0.0059576	3.32764	10
GO:0004452	MF	isopentenyl-diphosphate delta-isomerase activity	0.000570319	0.00600998	8.20817	4
GO:0009671	MF	nitrate:proton symporter activity	0.000570319	0.00600998	8.20817	4
GO:0016772	MF	transferase activity, transferring phosphorus-containing groups	0.000573416	0.00600998	1.12243	683
GO:0010328	MF	auxin influx transmembrane transporter activity	0.000577652	0.0060163	3.93992	8
GO:0005326	MF	neurotransmitter transporter activity	0.000583309	0.00603725	2.56505	15
GO:0010181	MF	FMN binding	0.000605021	0.00622308	1.95548	27
GO:0004301	MF	epoxide hydrolase activity	0.000643855	0.00650136	2.897	12
GO:0016803	MF	ether hydrolase activity	0.000643855	0.00650136	2.897	12
GO:0080031	MF	methyl salicylate esterase activity	0.000640689	0.00650136	2.75964	13
GO:0016709	MF	oxidoreductase activity, acting on paired donors, with incorporation or reduction of molecular oxygen, NAD(P)H as one donor, and incorporation of one atom of oxygen	0.000671317	0.00673758	1.42128	86
GO:0010436	MF	carotenoid dioxygenase activity	0.00102383	0.0102137	3.64808	8
GO:0047952	MF	glycerol-3-phosphate dehydrogenase [NAD(P)+] activity	0.00107353	0.0105013	5.59648	5
GO:0004356	MF	glutamate-ammonia ligase activity	0.00107353	0.0105013	5.59648	5
GO:0016211	MF	ammonia ligase activity	0.00107353	0.0105013	5.59648	5
GO:0004722	MF	protein serine/threonine phosphatase activity	0.00107804	0.0105013	1.64163	42
GO:0015079	MF	potassium ion transmembrane transporter activity	0.00112543	0.0108989	1.71136	36
GO:0047100	MF	glyceraldehyde-3-phosphate dehydrogenase (NADP+) (phosphorylating) activity	0.00124483	0.0119158	7.03557	4
GO:0018708	MF	thiol S-methyltransferase activity	0.00124483	0.0119158	7.03557	4
GO:0015144	MF	carbohydrate transmembrane transporter activity	0.00146525	0.0139451	1.61598	42
GO:0015194	MF	L-serine transmembrane transporter activity	0.00161455	0.0151056	4.3455	6
GO:0015193	MF	L-proline transmembrane transporter activity	0.00161455	0.0151056	4.3455	6
GO:0022889	MF	serine transmembrane transporter activity	0.00161455	0.0151056	4.3455	6
GO:0004751	MF	ribose-5-phosphate isomerase activity	0.00171747	0.015889	5.13011	5
GO:0015142	MF	tricarboxylic acid transmembrane transporter activity	0.00171747	0.015889	5.13011	5
GO:0048029	MF	monosaccharide binding	0.00173818	0.0159912	1.68332	35
GO:0016841	MF	ammonia-lyase activity	0.00177142	0.0162071	2.39405	14
GO:0016702	MF	oxidoreductase activity, acting on single donors with incorporation of molecular oxygen, incorporation of two atoms of oxygen	0.0018543	0.0168721	1.86549	25
GO:0020037	MF	heme binding	0.001873	0.0169491	1.19616	249
GO:0005516	MF	calmodulin binding	0.00192138	0.0172924	1.31874	110
GO:0052684	MF	L-serine hydro-lyase (adding indole, L-tryptophan-forming) activity	0.00201173	0.0180077	9.23419	3
GO:0005365	MF	myo-inositol transmembrane transporter activity	0.00212762	0.0189427	2.54736	12
GO:0015186	MF	L-glutamine transmembrane transporter activity	0.00225645	0.0199822	4.10408	6
GO:0005384	MF	manganese ion transmembrane transporter activity	0.00230383	0.0202407	2.18885	16
GO:0042973	MF	glucan endo-1,3-beta-D-glucosidase activity	0.00231008	0.0202407	1.69824	32
GO:0018742	MF	epoxide hydrolase B activity	0.00233848	0.020275	2.99487	9
GO:1901682	MF	sulfur compound transmembrane transporter activity	0.00233181	0.020275	2.25224	15
GO:0051536	MF	iron-sulfur cluster binding	0.00246831	0.0211789	1.45135	60
GO:0051540	MF	metal cluster binding	0.00246831	0.0211789	1.45135	60
GO:1901681	MF	sulfur compound binding	0.0027478	0.0234554	1.76825	27
GO:0031418	MF	L-ascorbic acid binding	0.00276928	0.0235176	1.89419	22
GO:0004805	MF	trehalose-phosphatase activity	0.00284631	0.0240484	2.91606	9
GO:0016801	MF	hydrolase activity, acting on ether bonds	0.00287047	0.0241294	2.46245	12
GO:0016645	MF	oxidoreductase activity, acting on the CH-NH group of donors	0.00302285	0.0251889	1.88104	22
GO:0022838	MF	substrate-specific channel activity	0.00302692	0.0251889	1.453	57
GO:0004351	MF	glutamate decarboxylase activity	0.0030731	0.0253186	3.88808	6
GO:0080030	MF	methyl indole-3-acetate esterase activity	0.00306458	0.0253186	1.71661	29
GO:0015166	MF	polyol transmembrane transporter activity	0.00331379	0.0271665	2.42208	12
GO:0120091	MF	jasmonic acid hydrolase	0.0033663	0.027461	3.07806	8
GO:0043765	MF	T/G mismatch-specific endonuclease activity	0.00378289	0.0305584	4.39723	5
GO:0016880	MF	acid-ammonia (or amide) ligase activity	0.00378289	0.0305584	4.39723	5
GO:0050736	MF	O-malonyltransferase activity	0.00383768	0.0308505	3.31484	7
GO:0003999	MF	adenine phosphoribosyltransferase activity	0.00392387	0.0309425	5.47211	4
GO:0004103	MF	choline kinase activity	0.00392387	0.0309425	5.47211	4
GO:0015141	MF	succinate transmembrane transporter activity	0.00392387	0.0309425	5.47211	4
GO:0004779	MF	sulfate adenylyltransferase activity	0.00392387	0.0309425	5.47211	4
GO:0015189	MF	L-lysine transmembrane transporter activity	0.00412063	0.0323401	2.77026	9
GO:0016646	MF	oxidoreductase activity, acting on the CH-NH group of donors, NAD or NADP as acceptor	0.00422582	0.0330093	2.46245	11
GO:0042887	MF	amide transmembrane transporter activity	0.00447945	0.0348261	1.42642	57
GO:0016673	MF	oxidoreductase activity, acting on a sulfur group of donors, iron-sulfur protein as acceptor	0.00472441	0.0357243	7.38735	3
GO:0004112	MF	cyclic-nucleotide phosphodiesterase activity	0.00472441	0.0357243	7.38735	3
GO:0047751	MF	cholestenone 5-alpha-reductase activity	0.00472441	0.0357243	7.38735	3
GO:0004668	MF	protein-arginine deiminase activity	0.00472441	0.0357243	7.38735	3
GO:0004113	MF	2',3'-cyclic-nucleotide 3'-phosphodiesterase activity	0.00472441	0.0357243	7.38735	3
GO:0047632	MF	agmatine deiminase activity	0.00472441	0.0357243	7.38735	3
GO:0019203	MF	carbohydrate phosphatase activity	0.00485765	0.0362988	2.15464	14
GO:0015267	MF	channel activity	0.00486614	0.0362988	1.387	65
GO:0022803	MF	passive transmembrane transporter activity	0.00486614	0.0362988	1.387	65
GO:0016701	MF	oxidoreductase activity, acting on single donors with incorporation of molecular oxygen	0.0049022	0.0364038	1.69608	27
GO:0016667	MF	oxidoreductase activity, acting on a sulfur group of donors	0.00521723	0.0385702	1.49979	43
GO:0004615	MF	phosphomannomutase activity	0.0052981	0.038994	4.10408	5
GO:0004084	MF	branched-chain-amino-acid transaminase activity	0.00533906	0.0391216	3.51779	6
GO:0005366	MF	myo-inositol:proton symporter activity	0.005986	0.0436688	3.07806	7
GO:0102742	MF	R(+)-3,4-dihydroxyphenyllactate:NADP+ oxidoreductase activity	0.00612141	0.0436942	4.9249	4
GO:0047995	MF	hydroxyphenylpyruvate reductase activity	0.00612141	0.0436942	4.9249	4
GO:0015513	MF	high-affinity secondary active nitrite transmembrane transporter activity	0.00612141	0.0436942	4.9249	4
GO:0004109	MF	coproporphyrinogen oxidase activity	0.00612141	0.0436942	4.9249	4
GO:0071949	MF	FAD binding	0.00607373	0.0436942	1.51071	40
GO:0004735	MF	pyrroline-5-carboxylate reductase activity	0.00659568	0.0466771	12.3123	2
GO:0018580	MF	nitronate monooxygenase activity	0.00659568	0.0466771	12.3123	2
GO:0004365	MF	glyceraldehyde-3-phosphate dehydrogenase (NAD+) (phosphorylating) activity	0.00684364	0.0478189	3.35789	6
GO:0043891	MF	glyceraldehyde-3-phosphate dehydrogenase (NAD(P)+) (phosphorylating) activity	0.00684364	0.0478189	3.35789	6
GO:0019842	MF	vitamin binding	0.00683504	0.0478189	1.37287	63
GO:1901618	MF	organic hydroxy compound transmembrane transporter activity	0.00713654	0.0496559	2.00743	15

## Sheet: N0_1W vs. N1_1W
Accession	Term_Type	Term_name	p-value	FDR	Rich_Ratio	Number
GO:2000022	BP	regulation of jasmonic acid mediated signaling pathway	6.69688e-35	2.59303e-31	5.16795	75
GO:0015849	BP	organic acid transport	4.37375e-22	5.64506e-19	2.6346	116
GO:0046942	BP	carboxylic acid transport	4.37375e-22	5.64506e-19	2.6346	116
GO:0030001	BP	metal ion transport	1.30975e-20	1.26784e-17	2.2451	148
GO:0006749	BP	glutathione metabolic process	3.72705e-20	2.88623e-17	3.12829	79
GO:0006811	BP	ion transport	6.96359e-20	4.49384e-17	1.64882	335
GO:0015711	BP	organic anion transport	7.53059e-19	4.16549e-16	2.24802	134
GO:0009611	BP	response to wounding	7.68838e-18	3.72118e-15	2.24159	127
GO:2000070	BP	regulation of response to water deprivation	1.47304e-17	5.50637e-15	3.62595	55
GO:0003333	BP	amino acid transmembrane transport	1.69076e-17	5.50637e-15	3.18166	66
GO:0006820	BP	anion transport	1.70652e-17	5.50637e-15	1.90729	185
GO:0042221	BP	response to chemical	1.37747e-17	5.50637e-15	1.33288	778
GO:0006865	BP	amino acid transport	4.74368e-17	1.41289e-14	2.81455	78
GO:0098656	BP	anion transmembrane transport	5.99088e-17	1.54645e-14	2.55596	92
GO:0042493	BP	response to drug	5.84485e-17	1.54645e-14	1.72309	243
GO:0006575	BP	cellular modified amino acid metabolic process	8.14759e-17	1.97172e-14	2.44917	99
GO:1903825	BP	organic acid transmembrane transport	1.97953e-16	4.2582e-14	2.90585	71
GO:1905039	BP	carboxylic acid transmembrane transport	1.97953e-16	4.2582e-14	2.90585	71
GO:0006790	BP	sulfur compound metabolic process	1.65514e-15	3.37299e-13	1.91199	161
GO:0031667	BP	response to nutrient levels	2.10977e-15	3.89001e-13	2.53588	84
GO:0010033	BP	response to organic substance	2.07631e-15	3.89001e-13	1.40038	516
GO:1901700	BP	response to oxygen-containing compound	7.93839e-15	1.39716e-12	1.36642	566
GO:0031669	BP	cellular response to nutrient levels	1.95679e-14	3.29422e-12	2.78533	66
GO:0016036	BP	cellular response to phosphate starvation	2.30466e-14	3.71819e-12	4.06545	38
GO:0051707	BP	response to other organism	8.21328e-14	1.27207e-11	1.39046	477
GO:0006468	BP	protein phosphorylation	1.30116e-13	1.93772e-11	1.46601	360
GO:0009267	BP	cellular response to starvation	1.69756e-13	2.43442e-11	2.87557	58
GO:0042594	BP	response to starvation	2.86966e-13	3.96833e-11	2.63921	66
GO:0006082	BP	organic acid metabolic process	5.32878e-13	7.11484e-11	1.38637	454
GO:0009605	BP	response to external stimulus	6.93006e-13	8.9444e-11	1.31398	617
GO:0043207	BP	response to external biotic stimulus	8.07227e-13	1.00825e-10	1.3698	478
GO:0009813	BP	flavonoid biosynthetic process	1.13745e-12	1.33461e-10	2.16313	94
GO:0046677	BP	response to antibiotic	1.13069e-12	1.33461e-10	1.75442	166
GO:0043436	BP	oxoacid metabolic process	1.33997e-12	1.52599e-10	1.38003	450
GO:0009607	BP	response to biotic stimulus	2.19551e-12	2.42886e-10	1.35363	493
GO:0009719	BP	response to endogenous stimulus	2.61225e-12	2.80962e-10	1.40851	393
GO:0048878	BP	chemical homeostasis	2.91189e-12	3.04725e-10	1.67454	187
GO:1901605	BP	alpha-amino acid metabolic process	3.17772e-12	3.23793e-10	1.80007	147
GO:0016310	BP	phosphorylation	3.62715e-12	3.60111e-10	1.40172	398
GO:0031098	BP	stress-activated protein kinase signaling cascade	6.47175e-12	6.26465e-10	3.39756	39
GO:0050801	BP	ion homeostasis	8.04079e-12	7.59365e-10	1.84201	132
GO:0042445	BP	hormone metabolic process	1.44241e-11	1.32976e-09	1.7917	140
GO:0032147	BP	activation of protein kinase activity	1.66813e-11	1.50209e-09	3.14262	42
GO:0006812	BP	cation transport	2.68261e-11	2.3607e-09	1.66445	174
GO:0010200	BP	response to chitin	3.68542e-11	3.1711e-09	2.06295	91
GO:0098771	BP	inorganic ion homeostasis	4.13532e-11	3.48086e-09	1.9025	112
GO:0009625	BP	response to insect	4.61167e-11	3.79923e-09	4.22182	27
GO:0009725	BP	response to hormone	5.01272e-11	4.04359e-09	1.3929	369
GO:0080134	BP	regulation of response to stress	5.21919e-11	4.12422e-09	1.58273	204
GO:0019752	BP	carboxylic acid metabolic process	6.57388e-11	5.09081e-09	1.36402	410
GO:0070838	BP	divalent metal ion transport	9.34986e-11	6.96205e-09	2.42338	61
GO:0072511	BP	divalent inorganic cation transport	9.34986e-11	6.96205e-09	2.42338	61
GO:0016053	BP	organic acid biosynthetic process	1.39749e-10	1.00205e-08	1.48722	254
GO:0046394	BP	carboxylic acid biosynthetic process	1.39749e-10	1.00205e-08	1.48722	254
GO:0010646	BP	regulation of cell communication	1.45398e-10	1.0236e-08	1.5443	215
GO:0031347	BP	regulation of defense response	1.5761e-10	1.0731e-08	1.71364	145
GO:0055085	BP	transmembrane transport	1.57972e-10	1.0731e-08	1.50128	242
GO:0009751	BP	response to salicylic acid	1.74415e-10	1.16437e-08	1.79148	125
GO:0000302	BP	response to reactive oxygen species	2.16777e-10	1.39893e-08	2.11297	79
GO:0009812	BP	flavonoid metabolic process	2.14626e-10	1.39893e-08	1.94901	97
GO:0009065	BP	glutamine family amino acid catabolic process	2.33451e-10	1.48184e-08	4.92546	21
GO:0035556	BP	intracellular signal transduction	2.40313e-10	1.50079e-08	1.50012	238
GO:0010817	BP	regulation of hormone levels	3.22388e-10	1.92536e-08	1.55882	199
GO:0009966	BP	regulation of signal transduction	3.21311e-10	1.92536e-08	1.54413	207
GO:0001101	BP	response to acid chemical	3.23213e-10	1.92536e-08	1.33714	429
GO:0090333	BP	regulation of stomatal closure	3.84936e-10	2.25829e-08	3.15877	36
GO:0044283	BP	small molecule biosynthetic process	4.07147e-10	2.35294e-08	1.41561	307
GO:0014070	BP	response to organic cyclic compound	6.10166e-10	3.47436e-08	1.63786	159
GO:0023051	BP	regulation of signaling	7.04479e-10	3.95325e-08	1.52637	209
GO:0006530	BP	asparagine catabolic process	7.71207e-10	4.2058e-08	10.1636	10
GO:0033345	BP	asparagine catabolic process via L-aspartate	7.71207e-10	4.2058e-08	10.1636	10
GO:0009695	BP	jasmonic acid biosynthetic process	1.11774e-09	6.01094e-08	3.95986	25
GO:0031408	BP	oxylipin biosynthetic process	1.19249e-09	6.23961e-08	2.98851	37
GO:0045860	BP	positive regulation of protein kinase activity	1.17654e-09	6.23961e-08	2.7689	42
GO:0097305	BP	response to alcohol	1.52745e-09	7.88573e-08	1.58442	172
GO:1902584	BP	positive regulation of response to water deprivation	1.67672e-09	8.54243e-08	3.77507	26
GO:0048583	BP	regulation of response to stimulus	1.8512e-09	9.30889e-08	1.35725	359
GO:0055082	BP	cellular chemical homeostasis	1.88235e-09	9.34415e-08	1.89994	93
GO:0031407	BP	oxylipin metabolic process	2.13912e-09	1.04844e-07	2.9303	37
GO:0009755	BP	hormone-mediated signaling pathway	2.47792e-09	1.19931e-07	1.36352	344
GO:0009064	BP	glutamine family amino acid metabolic process	2.60774e-09	1.24656e-07	2.34545	55
GO:0009636	BP	response to toxic substance	2.74607e-09	1.29668e-07	1.96563	83
GO:0009864	BP	induced systemic resistance, jasmonic acid mediated signaling pathway	3.49055e-09	1.62836e-07	4.98942	18
GO:0044281	BP	small molecule metabolic process	4.35112e-09	2.00566e-07	1.24589	617
GO:0080187	BP	floral organ senescence	4.70762e-09	2.14446e-07	5.18346	17
GO:0071577	BP	zinc ion transmembrane transport	5.091e-09	2.29214e-07	4.26873	21
GO:0033674	BP	positive regulation of kinase activity	5.31714e-09	2.36643e-07	2.64045	42
GO:0051704	BP	multi-organism process	6.02619e-09	2.65153e-07	1.27675	503
GO:0023014	BP	signal transduction by protein phosphorylation	6.2417e-09	2.71549e-07	2.62691	42
GO:0016054	BP	organic acid catabolic process	6.8039e-09	2.92719e-07	1.90361	86
GO:0007165	BP	signal transduction	6.93044e-09	2.94886e-07	1.27232	512
GO:0034220	BP	ion transmembrane transport	8.425e-09	3.54582e-07	1.63975	137
GO:1901606	BP	alpha-amino acid catabolic process	1.00225e-08	4.12843e-07	2.30038	53
GO:0009737	BP	response to abscisic acid	1.00157e-08	4.12843e-07	1.56144	164
GO:0050896	BP	response to stimulus	1.38629e-08	5.65024e-07	1.11731	1759
GO:0006793	BP	phosphorus metabolic process	1.67276e-08	6.74678e-07	1.24874	562
GO:1905622	BP	negative regulation of leaf development	1.72487e-08	6.88526e-07	4.37228	19
GO:1900055	BP	regulation of leaf senescence	2.0525e-08	8.10949e-07	3.22168	28
GO:0065008	BP	regulation of biological quality	2.42903e-08	9.50021e-07	1.28292	448
GO:0002229	BP	defense response to oomycetes	2.8299e-08	1.09574e-06	1.93798	75
GO:0009694	BP	jasmonic acid metabolic process	3.1156e-08	1.19442e-06	2.80187	34
GO:0002239	BP	response to oomycetes	3.18204e-08	1.19995e-06	1.86427	83
GO:1901698	BP	response to nitrogen compound	3.19202e-08	1.19995e-06	1.54384	160
GO:0007568	BP	aging	3.34746e-08	1.24629e-06	1.75235	100
GO:0010119	BP	regulation of stomatal movement	3.39609e-08	1.25235e-06	2.22133	53
GO:0010243	BP	response to organonitrogen compound	3.84622e-08	1.40496e-06	1.60858	134
GO:0055080	BP	cation homeostasis	4.53314e-08	1.6404e-06	1.75256	98
GO:0009873	BP	ethylene-activated signaling pathway	4.67326e-08	1.67545e-06	1.73022	102
GO:0009063	BP	cellular amino acid catabolic process	4.81156e-08	1.69367e-06	2.18081	54
GO:0046395	BP	carboxylic acid catabolic process	4.79209e-08	1.69367e-06	1.84726	83
GO:0006796	BP	phosphate-containing compound metabolic process	5.99895e-08	2.09261e-06	1.24096	547
GO:0006829	BP	zinc ion transport	6.28286e-08	2.17207e-06	3.76652	21
GO:0006558	BP	L-phenylalanine metabolic process	6.70465e-08	2.25327e-06	3.13621	27
GO:1902221	BP	erythrose 4-phosphate/phosphoenolpyruvate family amino acid metabolic process	6.70465e-08	2.25327e-06	3.13621	27
GO:0006873	BP	cellular ion homeostasis	6.75051e-08	2.25327e-06	1.97859	67
GO:0010150	BP	leaf senescence	6.68888e-08	2.25327e-06	1.87267	78
GO:0055062	BP	phosphate ion homeostasis	6.94009e-08	2.27729e-06	5.33591	14
GO:0072506	BP	trivalent inorganic anion homeostasis	6.94009e-08	2.27729e-06	5.33591	14
GO:0009617	BP	response to bacterium	8.05131e-08	2.61972e-06	1.39195	248
GO:0010104	BP	regulation of ethylene-activated signaling pathway	8.35701e-08	2.65232e-06	3.36451	24
GO:0070297	BP	regulation of phosphorelay signal transduction system	8.35701e-08	2.65232e-06	3.36451	24
GO:0006835	BP	dicarboxylic acid transport	8.29462e-08	2.65232e-06	3.10662	27
GO:0009620	BP	response to fungus	1.29411e-07	4.07381e-06	1.48673	172
GO:0048527	BP	lateral root development	1.46658e-07	4.57951e-06	2.52104	37
GO:0071585	BP	detoxification of cadmium ion	1.54534e-07	4.78685e-06	7.17433	10
GO:0001934	BP	positive regulation of protein phosphorylation	1.81146e-07	5.56666e-06	2.32055	43
GO:0080167	BP	response to karrikin	1.86171e-07	5.67601e-06	2.29333	44
GO:0009308	BP	amine metabolic process	2.01836e-07	6.10553e-06	1.92272	67
GO:1900056	BP	negative regulation of leaf senescence	2.35338e-07	7.06378e-06	4.14676	17
GO:0042447	BP	hormone catabolic process	2.8519e-07	8.49429e-06	3.26182	23
GO:0009765	BP	photosynthesis, light harvesting	2.9454e-07	8.70581e-06	3.07989	25
GO:0009718	BP	anthocyanin-containing compound biosynthetic process	2.987e-07	8.76187e-06	2.52587	35
GO:0090693	BP	plant organ senescence	3.58846e-07	1.0447e-05	1.78375	80
GO:0048528	BP	post-embryonic root development	3.84392e-07	1.10249e-05	2.26053	43
GO:0006520	BP	cellular amino acid metabolic process	3.83677e-07	1.10249e-05	1.46019	173
GO:0072505	BP	divalent inorganic anion homeostasis	4.0775e-07	1.16089e-05	4.74303	14
GO:0080151	BP	positive regulation of salicylic acid mediated signaling pathway	4.91149e-07	1.38812e-05	5.42061	12
GO:0044282	BP	small molecule catabolic process	5.30546e-07	1.4886e-05	1.64554	102
GO:0042327	BP	positive regulation of phosphorylation	5.52603e-07	1.52834e-05	2.23168	43
GO:0047484	BP	regulation of response to osmotic stress	5.52603e-07	1.52834e-05	2.23168	43
GO:0033993	BP	response to lipid	5.75797e-07	1.58119e-05	1.42428	190
GO:0051560	BP	mitochondrial calcium ion homeostasis	6.06289e-07	1.65321e-05	4.61484	14
GO:0010035	BP	response to inorganic substance	6.24879e-07	1.69198e-05	1.30089	325
GO:0009753	BP	response to jasmonic acid	6.44425e-07	1.73279e-05	1.9501	59
GO:0015740	BP	C4-dicarboxylate transport	6.82987e-07	1.82381e-05	3.56509	19
GO:0015802	BP	basic amino acid transport	7.95071e-07	2.10857e-05	5.22701	12
GO:0000160	BP	phosphorelay signal transduction system	1.05417e-06	2.7767e-05	1.54995	122
GO:0046777	BP	protein autophosphorylation	1.12268e-06	2.93719e-05	1.6068	105
GO:0061687	BP	detoxification of inorganic compound	1.16561e-06	3.00876e-05	6.09818	10
GO:0009309	BP	amine biosynthetic process	1.17335e-06	3.00876e-05	2.42501	34
GO:0042401	BP	cellular biogenic amine biosynthetic process	1.17335e-06	3.00876e-05	2.42501	34
GO:0006816	BP	calcium ion transport	1.2945e-06	3.29756e-05	2.34796	36
GO:0009409	BP	response to cold	1.46933e-06	3.71846e-05	1.49256	140
GO:0015743	BP	malate transport	1.80816e-06	4.54624e-05	3.82631	16
GO:0009863	BP	salicylic acid mediated signaling pathway	1.84889e-06	4.61864e-05	2.34545	35
GO:2001025	BP	positive regulation of response to drug	1.93452e-06	4.771e-05	4.87855	12
GO:2001040	BP	positive regulation of cellular response to drug	1.93452e-06	4.771e-05	4.87855	12
GO:0090696	BP	post-embryonic plant organ development	1.94864e-06	4.7754e-05	2.13188	43
GO:0010038	BP	response to metal ion	2.24218e-06	5.4602e-05	1.53253	120
GO:0030003	BP	cellular cation homeostasis	2.299e-06	5.56357e-05	1.89943	57
GO:0010562	BP	positive regulation of phosphorus metabolic process	2.39329e-06	5.72025e-05	2.03996	47
GO:0045937	BP	positive regulation of phosphate metabolic process	2.39329e-06	5.72025e-05	2.03996	47
GO:0045088	BP	regulation of innate immune response	2.56898e-06	6.1025e-05	1.80996	65
GO:0015893	BP	drug transport	2.83085e-06	6.68358e-05	1.91111	55
GO:0048544	BP	recognition of pollen	2.92598e-06	6.86629e-05	1.68585	81
GO:0055083	BP	monovalent inorganic anion homeostasis	2.9712e-06	6.93042e-05	3.89246	15
GO:0098542	BP	defense response to other organism	3.21764e-06	7.4603e-05	1.26194	355
GO:0046283	BP	anthocyanin-containing compound metabolic process	3.50998e-06	8.08967e-05	2.28274	35
GO:0010365	BP	positive regulation of ethylene biosynthetic process	3.69999e-06	8.32928e-05	12.1964	5
GO:0031337	BP	positive regulation of sulfur amino acid metabolic process	3.69999e-06	8.32928e-05	12.1964	5
GO:1900910	BP	positive regulation of olefin metabolic process	3.69999e-06	8.32928e-05	12.1964	5
GO:1900913	BP	positive regulation of olefin biosynthetic process	3.69999e-06	8.32928e-05	12.1964	5
GO:0055065	BP	metal ion homeostasis	3.9246e-06	8.78385e-05	1.73884	71
GO:0009628	BP	response to abiotic stimulus	3.97319e-06	8.8415e-05	1.18464	616
GO:0006560	BP	proline metabolic process	4.32266e-06	9.5642e-05	4.57364	12
GO:0008037	BP	cell recognition	6.32356e-06	0.000139118	1.65202	81
GO:0046148	BP	pigment biosynthetic process	7.45015e-06	0.000162977	1.77044	63
GO:1905034	BP	regulation of antifungal innate immune response	7.72384e-06	0.000168015	6.50473	8
GO:0055081	BP	anion homeostasis	8.76559e-06	0.000189611	2.43927	28
GO:0051347	BP	positive regulation of transferase activity	8.82544e-06	0.000189845	1.99494	44
GO:0042592	BP	homeostatic process	9.1377e-06	0.000195476	1.3371	214
GO:0098754	BP	detoxification	9.20333e-06	0.000195798	2.21752	34
GO:0008652	BP	cellular amino acid biosynthetic process	1.00236e-05	0.000211565	1.6371	80
GO:0009699	BP	phenylpropanoid biosynthetic process	1.00537e-05	0.000211565	1.62618	82
GO:1901607	BP	alpha-amino acid biosynthetic process	1.03002e-05	0.000215581	1.67135	74
GO:0042742	BP	defense response to bacterium	1.11564e-05	0.000232246	1.33486	212
GO:0010230	BP	alternative respiration	1.43311e-05	0.000296738	6.09818	8
GO:0000187	BP	activation of MAPK activity	1.54045e-05	0.000313928	3.4518	15
GO:0015800	BP	acidic amino acid transport	1.54045e-05	0.000313928	3.4518	15
GO:0043406	BP	positive regulation of MAP kinase activity	1.54045e-05	0.000313928	3.4518	15
GO:0009738	BP	abscisic acid-activated signaling pathway	1.68577e-05	0.000341743	1.52082	102
GO:0002218	BP	activation of innate immune response	1.78181e-05	0.000359331	2.03273	39
GO:0006493	BP	protein O-linked glycosylation	1.93974e-05	0.000389154	2.65663	22
GO:0032104	BP	regulation of response to extracellular stimulus	2.04751e-05	0.000400403	8.13091	6
GO:0032107	BP	regulation of response to nutrient levels	2.04751e-05	0.000400403	8.13091	6
GO:0009068	BP	aspartate family amino acid catabolic process	2.01923e-05	0.000400403	3.55727	14
GO:0009685	BP	gibberellin metabolic process	2.04327e-05	0.000400403	2.29672	29
GO:0072507	BP	divalent inorganic cation homeostasis	2.01572e-05	0.000400403	2.11323	35
GO:0006562	BP	proline catabolic process	2.06842e-05	0.000400447	10.1636	5
GO:0010133	BP	proline catabolic process to glutamate	2.06842e-05	0.000400447	10.1636	5
GO:0009094	BP	L-phenylalanine biosynthetic process	2.11592e-05	0.000405587	4.69091	10
GO:1902223	BP	erythrose 4-phosphate/phosphoenolpyruvate family amino acid biosynthetic process	2.11592e-05	0.000405587	4.69091	10
GO:0009072	BP	aromatic amino acid family metabolic process	2.5054e-05	0.000477878	1.83129	50
GO:0045859	BP	regulation of protein kinase activity	2.53964e-05	0.000482034	1.78483	54
GO:0006521	BP	regulation of cellular amino acid metabolic process	2.61412e-05	0.000491352	3.48468	14
GO:0033238	BP	regulation of cellular amine metabolic process	2.61412e-05	0.000491352	3.48468	14
GO:0001764	BP	neuron migration	2.8288e-05	0.000529135	4.1925	11
GO:0009073	BP	aromatic amino acid family biosynthetic process	2.98606e-05	0.000555867	2.18548	31
GO:0090357	BP	regulation of tryptophan metabolic process	3.07864e-05	0.000570359	4.98942	9
GO:0009862	BP	systemic acquired resistance, salicylic acid mediated signaling pathway	3.13729e-05	0.000578456	2.58	22
GO:0042446	BP	hormone biosynthetic process	3.31077e-05	0.000607549	1.56411	84
GO:0009768	BP	photosynthesis, light harvesting in photosystem I	3.41004e-05	0.000622814	3.60347	13
GO:0009682	BP	induced systemic resistance	3.85239e-05	0.000700303	2.96197	17
GO:1901002	BP	positive regulation of response to salt stress	4.00045e-05	0.00072382	2.48245	23
GO:0006813	BP	potassium ion transport	4.07207e-05	0.000733352	1.98061	38
GO:0050776	BP	regulation of immune response	4.09784e-05	0.000734576	1.64749	67
GO:0009809	BP	lignin biosynthetic process	4.18709e-05	0.000747116	1.86046	45
GO:0043410	BP	positive regulation of MAPK cascade	4.95122e-05	0.000879409	3.15423	15
GO:0010438	BP	cellular response to sulfur starvation	5.07426e-05	0.000897147	6.09818	7
GO:0035268	BP	protein mannosylation	5.37818e-05	0.000946559	3.94588	11
GO:0016101	BP	diterpenoid metabolic process	5.93134e-05	0.00103919	1.89413	41
GO:0043549	BP	regulation of kinase activity	6.11255e-05	0.00106612	1.72862	54
GO:0002253	BP	activation of immune response	6.31361e-05	0.00109625	1.90568	40
GO:0009112	BP	nucleobase metabolic process	6.84384e-05	0.00118243	2.18909	28
GO:1902531	BP	regulation of intracellular signal transduction	6.87103e-05	0.00118243	1.80978	46
GO:0009266	BP	response to temperature stimulus	7.06896e-05	0.00121111	1.31209	193
GO:0006814	BP	sodium ion transport	7.90809e-05	0.0013489	2.63331	19
GO:0043405	BP	regulation of MAP kinase activity	8.01194e-05	0.00136062	2.91256	16
GO:0006576	BP	cellular biogenic amine metabolic process	8.47401e-05	0.00142658	1.84927	42
GO:0044106	BP	cellular amine metabolic process	8.47401e-05	0.00142658	1.84927	42
GO:0048584	BP	positive regulation of response to stimulus	8.5697e-05	0.00143645	1.38225	136
GO:0035269	BP	protein O-linked mannosylation	8.81958e-05	0.00147196	4.06545	10
GO:0046505	BP	sulfolipid metabolic process	9.74359e-05	0.00161227	6.65256	6
GO:0046506	BP	sulfolipid biosynthetic process	9.74359e-05	0.00161227	6.65256	6
GO:0045089	BP	positive regulation of innate immune response	0.000101223	0.00166781	1.79358	45
GO:0006875	BP	cellular metal ion homeostasis	0.000107201	0.00175882	1.84521	41
GO:0006559	BP	L-phenylalanine catabolic process	0.00011641	0.00189386	2.72813	17
GO:1902222	BP	erythrose 4-phosphate/phosphoenolpyruvate family amino acid catabolic process	0.00011641	0.00189386	2.72813	17
GO:0030417	BP	nicotianamine metabolic process	0.00012766	0.00204257	3.62595	11
GO:0030418	BP	nicotianamine biosynthetic process	0.00012766	0.00204257	3.62595	11
GO:0072351	BP	tricarboxylic acid biosynthetic process	0.00012766	0.00204257	3.62595	11
GO:0009742	BP	brassinosteroid mediated signaling pathway	0.000127557	0.00204257	1.7888	44
GO:0071902	BP	positive regulation of protein serine/threonine kinase activity	0.000137365	0.00217202	2.9039	15
GO:0009692	BP	ethylene metabolic process	0.000139678	0.00217202	2.78774	16
GO:0009693	BP	ethylene biosynthetic process	0.000139678	0.00217202	2.78774	16
GO:0043449	BP	cellular alkene metabolic process	0.000139678	0.00217202	2.78774	16
GO:0043450	BP	alkene biosynthetic process	0.000139678	0.00217202	2.78774	16
GO:1900674	BP	olefin biosynthetic process	0.000139678	0.00217202	2.78774	16
GO:1900457	BP	regulation of brassinosteroid mediated signaling pathway	0.0001392	0.00217202	2.17196	26
GO:0019725	BP	cellular homeostasis	0.000169758	0.00262922	1.39455	118
GO:0015853	BP	adenine transport	0.000181299	0.00277466	6.09818	6
GO:0015854	BP	guanine transport	0.000181299	0.00277466	6.09818	6
GO:0034486	BP	vacuolar transmembrane transport	0.000181299	0.00277466	6.09818	6
GO:0009698	BP	phenylpropanoid metabolic process	0.00019307	0.00294318	1.45418	93
GO:0015813	BP	L-glutamate transmembrane transport	0.000198848	0.00301937	4.06545	9
GO:0015858	BP	nucleoside transport	0.000210967	0.00314178	9.75709	4
GO:0030643	BP	cellular phosphate ion homeostasis	0.000210967	0.00314178	9.75709	4
GO:0072501	BP	cellular divalent inorganic anion homeostasis	0.000210967	0.00314178	9.75709	4
GO:0072502	BP	cellular trivalent inorganic anion homeostasis	0.000210967	0.00314178	9.75709	4
GO:1902457	BP	negative regulation of stomatal opening	0.000210967	0.00314178	9.75709	4
GO:1905582	BP	response to mannose	0.000216252	0.00320816	3.69587	10
GO:0010476	BP	gibberellin mediated signaling pathway	0.000228151	0.00337176	1.94171	32
GO:1902456	BP	regulation of stomatal opening	0.000230586	0.00339479	5.02203	7
GO:1900673	BP	olefin metabolic process	0.000234623	0.00344113	2.67318	16
GO:0006855	BP	drug transmembrane transport	0.000236545	0.00344822	1.80859	39
GO:0009743	BP	response to carbohydrate	0.000236887	0.00344822	1.79358	40
GO:0044550	BP	secondary metabolite biosynthetic process	0.000242897	0.00352247	1.41626	103
GO:0097502	BP	mannosylation	0.000252146	0.00364294	3.18166	12
GO:0048364	BP	root development	0.00027022	0.00388956	1.46632	85
GO:0015695	BP	organic cation transport	0.000271786	0.00389761	3.92026	9
GO:1900057	BP	positive regulation of leaf senescence	0.000274315	0.00390495	3.354	11
GO:1905623	BP	positive regulation of leaf development	0.000274315	0.00390495	3.354	11
GO:0015804	BP	neutral amino acid transport	0.000283949	0.00401259	3.58717	10
GO:0046885	BP	regulation of hormone biosynthetic process	0.000283354	0.00401259	2.1523	24
GO:0009311	BP	oligosaccharide metabolic process	0.000303033	0.0042667	1.64991	51
GO:0055129	BP	L-proline biosynthetic process	0.000313285	0.00439508	5.62909	6
GO:0046686	BP	response to cadmium ion	0.000314851	0.00440109	1.52183	70
GO:0009867	BP	jasmonic acid mediated signaling pathway	0.000317568	0.00442311	1.84793	35
GO:0043408	BP	regulation of MAPK cascade	0.000325313	0.00451326	2.60189	16
GO:0006721	BP	terpenoid metabolic process	0.000326372	0.00451326	1.48005	79
GO:0003032	BP	detection of oxygen	0.00035166	0.00467913	6.77576	5
GO:0010555	BP	response to mannitol	0.00035166	0.00467913	6.77576	5
GO:0018158	BP	protein oxidation	0.00035166	0.00467913	6.77576	5
GO:0018171	BP	peptidyl-cysteine oxidation	0.00035166	0.00467913	6.77576	5
GO:0030656	BP	regulation of vitamin metabolic process	0.00035166	0.00467913	6.77576	5
GO:0046136	BP	positive regulation of vitamin metabolic process	0.00035166	0.00467913	6.77576	5
GO:0070483	BP	detection of hypoxia	0.00035166	0.00467913	6.77576	5
GO:1904965	BP	regulation of vitamin E biosynthetic process	0.00035166	0.00467913	6.77576	5
GO:1904966	BP	positive regulation of vitamin E biosynthetic process	0.00035166	0.00467913	6.77576	5
GO:0034051	BP	negative regulation of plant-type hypersensitive response	0.00035063	0.00467913	4.74303	7
GO:0009740	BP	gibberellic acid mediated signaling pathway	0.000348424	0.00467913	1.91922	31
GO:0042440	BP	pigment metabolic process	0.000364505	0.00483344	1.54568	64
GO:0009095	BP	aromatic amino acid family biosynthetic process, prephenate pathway	0.000368475	0.00486941	3.48468	10
GO:0006720	BP	isoprenoid metabolic process	0.000380562	0.00501203	1.44064	88
GO:0006308	BP	DNA catabolic process	0.000387059	0.0050461	3.04909	12
GO:0006880	BP	intracellular sequestering of iron ion	0.000387059	0.0050461	3.04909	12
GO:0097577	BP	sequestering of iron ion	0.000387059	0.0050461	3.04909	12
GO:0000041	BP	transition metal ion transport	0.000440789	0.0057273	2.09081	24
GO:0000162	BP	tryptophan biosynthetic process	0.000469696	0.00602488	2.61351	15
GO:0006536	BP	glutamate metabolic process	0.000469696	0.00602488	2.61351	15
GO:0046219	BP	indolalkylamine biosynthetic process	0.000469696	0.00602488	2.61351	15
GO:0042542	BP	response to hydrogen peroxide	0.000469916	0.00602488	1.84624	33
GO:0006528	BP	asparagine metabolic process	0.000472943	0.00604368	3.38788	10
GO:0002684	BP	positive regulation of immune system process	0.000480661	0.00612211	1.64445	48
GO:0032787	BP	monocarboxylic acid metabolic process	0.000482915	0.00613064	1.2651	192
GO:0005975	BP	carbohydrate metabolic process	0.000487185	0.00616464	1.18124	363
GO:0050778	BP	positive regulation of immune response	0.000506987	0.00639431	1.65986	46
GO:0006169	BP	adenosine salvage	0.000550953	0.00640628	12.1964	3
GO:0006750	BP	glutathione biosynthetic process	0.000550953	0.00640628	12.1964	3
GO:0010055	BP	atrichoblast differentiation	0.000550953	0.00640628	12.1964	3
GO:0010446	BP	response to alkaline pH	0.000550953	0.00640628	12.1964	3
GO:0019419	BP	sulfate reduction	0.000550953	0.00640628	12.1964	3
GO:0033274	BP	response to vitamin B2	0.000550953	0.00640628	12.1964	3
GO:0034487	BP	vacuolar amino acid transmembrane transport	0.000550953	0.00640628	12.1964	3
GO:0034488	BP	basic amino acid transmembrane export from vacuole	0.000550953	0.00640628	12.1964	3
GO:0046086	BP	adenosine biosynthetic process	0.000550953	0.00640628	12.1964	3
GO:0051930	BP	regulation of sensory perception of pain	0.000550953	0.00640628	12.1964	3
GO:0051931	BP	regulation of sensory perception	0.000550953	0.00640628	12.1964	3
GO:0060292	BP	long-term synaptic depression	0.000550953	0.00640628	12.1964	3
GO:0061720	BP	6-sulfoquinovose(1-) catabolic process to glycerone phosphate and 3-sulfolactaldehyde	0.000550953	0.00640628	12.1964	3
GO:0071435	BP	potassium ion export	0.000550953	0.00640628	12.1964	3
GO:0097623	BP	potassium ion export across plasma membrane	0.000550953	0.00640628	12.1964	3
GO:0097756	BP	negative regulation of blood vessel diameter	0.000550953	0.00640628	12.1964	3
GO:0110127	BP	phloem unloading	0.000550953	0.00640628	12.1964	3
GO:0110128	BP	phloem sucrose unloading	0.000550953	0.00640628	12.1964	3
GO:1902776	BP	6-sulfoquinovose(1-) metabolic process	0.000550953	0.00640628	12.1964	3
GO:1902777	BP	6-sulfoquinovose(1-) catabolic process	0.000550953	0.00640628	12.1964	3
GO:1990822	BP	basic amino acid transmembrane transport	0.000550953	0.00640628	12.1964	3
GO:2000124	BP	regulation of endocannabinoid signaling pathway	0.000550953	0.00640628	12.1964	3
GO:0046475	BP	glycerophospholipid catabolic process	0.000510192	0.00640628	5.22701	6
GO:0009593	BP	detection of chemical stimulus	0.000515944	0.00640628	4.4934	7
GO:0015697	BP	quaternary ammonium group transport	0.000515944	0.00640628	4.4934	7
GO:0010043	BP	response to zinc ion	0.000550856	0.00640628	2.5767	15
GO:0009410	BP	response to xenobiotic stimulus	0.000586966	0.00680459	2.78163	13
GO:0051562	BP	negative regulation of mitochondrial calcium ion concentration	0.000591532	0.00683705	8.13091	4
GO:0010384	BP	cell wall proteoglycan metabolic process	0.0006332	0.0072323	3.54088	9
GO:0010404	BP	cell wall hydroxyproline-rich glycoprotein metabolic process	0.0006332	0.0072323	3.54088	9
GO:0010405	BP	arabinogalactan protein metabolic process	0.0006332	0.0072323	3.54088	9
GO:0018258	BP	protein O-linked glycosylation via hydroxyproline	0.0006332	0.0072323	3.54088	9
GO:0006874	BP	cellular calcium ion homeostasis	0.00064493	0.00730166	2.11276	22
GO:0055074	BP	calcium ion homeostasis	0.00064493	0.00730166	2.11276	22
GO:2000031	BP	regulation of salicylic acid mediated signaling pathway	0.00064493	0.00730166	2.11276	22
GO:2000024	BP	regulation of leaf development	0.000647203	0.00730604	1.83232	32
GO:0072330	BP	monocarboxylic acid biosynthetic process	0.000683258	0.00769063	1.31987	133
GO:0043401	BP	steroid hormone mediated signaling pathway	0.000690992	0.00774286	1.6563	44
GO:0044272	BP	sulfur compound biosynthetic process	0.000691898	0.00774286	1.60057	50
GO:0055076	BP	transition metal ion homeostasis	0.000697301	0.00778084	1.75628	36
GO:0043090	BP	amino acid import	0.000700455	0.007789	2.86973	12
GO:0042537	BP	benzene-containing compound metabolic process	0.000702106	0.007789	1.82376	32
GO:0001932	BP	regulation of protein phosphorylation	0.000704068	0.007789	1.54831	57
GO:0009074	BP	aromatic amino acid family catabolic process	0.00075251	0.00830119	2.22818	19
GO:0055073	BP	cadmium ion homeostasis	0.000755973	0.0083157	3.20957	10
GO:0008643	BP	carbohydrate transport	0.000761126	0.00834866	1.77973	34
GO:0009070	BP	serine family amino acid biosynthetic process	0.000801071	0.008762	2.08	22
GO:0019740	BP	nitrogen utilization	0.000817337	0.00891473	3.43023	9
GO:0099402	BP	plant organ development	0.000910193	0.00989963	1.31741	128
GO:0032101	BP	regulation of response to external stimulus	0.000913418	0.00990688	1.47768	67
GO:0010193	BP	response to ozone	0.00100572	0.0108775	2.43927	15
GO:0080148	BP	negative regulation of response to water deprivation	0.00102869	0.011095	4.06545	7
GO:0006206	BP	pyrimidine nucleobase metabolic process	0.00107461	0.011558	2.16571	19
GO:0006542	BP	glutamine biosynthetic process	0.00112094	0.0119567	5.5438	5
GO:0033240	BP	positive regulation of cellular amine metabolic process	0.00112094	0.0119567	5.5438	5
GO:0045764	BP	positive regulation of cellular amino acid metabolic process	0.00112094	0.0119567	5.5438	5
GO:0009800	BP	cinnamic acid biosynthetic process	0.00115645	0.0122315	2.59923	13
GO:0009803	BP	cinnamic acid metabolic process	0.00115645	0.0122315	2.59923	13
GO:0070588	BP	calcium ion transmembrane transport	0.00115934	0.0122315	2.40718	15
GO:0098661	BP	inorganic anion transmembrane transport	0.00115934	0.0122315	2.40718	15
GO:0046244	BP	salicylic acid catabolic process	0.00117865	0.0123012	4.57364	6
GO:0051180	BP	vitamin transport	0.00117865	0.0123012	4.57364	6
GO:2001142	BP	nicotinate transport	0.00117865	0.0123012	4.57364	6
GO:2001143	BP	N-methylnicotinate transport	0.00117865	0.0123012	4.57364	6
GO:0016103	BP	diterpenoid catabolic process	0.00120255	0.0124499	2.7103	12
GO:0045487	BP	gibberellin catabolic process	0.00120255	0.0124499	2.7103	12
GO:0051238	BP	sequestering of metal ion	0.00120255	0.0124499	2.7103	12
GO:0019932	BP	second-messenger-mediated signaling	0.0012086	0.0124792	1.84594	28
GO:0072503	BP	cellular divalent inorganic cation homeostasis	0.00121336	0.0124951	2.01744	22
GO:0042325	BP	regulation of phosphorylation	0.00126097	0.0129508	1.49914	59
GO:0010647	BP	positive regulation of cell communication	0.00132757	0.0135988	1.46537	65
GO:0009084	BP	glutamine family amino acid biosynthetic process	0.0013704	0.0140005	2.29579	16
GO:0009749	BP	response to glucose	0.00137411	0.0140014	2.17361	18
GO:0046886	BP	positive regulation of hormone biosynthetic process	0.00140262	0.0142545	3.88066	7
GO:0009789	BP	positive regulation of abscisic acid-activated signaling pathway	0.0014528	0.0146491	1.92574	24
GO:1901421	BP	positive regulation of response to alcohol	0.0014528	0.0146491	1.92574	24
GO:1905959	BP	positive regulation of cellular response to alcohol	0.0014528	0.0146491	1.92574	24
GO:0051338	BP	regulation of transferase activity	0.00145989	0.0146823	1.48983	59
GO:0055067	BP	monovalent inorganic cation homeostasis	0.00148465	0.0148926	1.67135	37
GO:0019748	BP	secondary metabolic process	0.00154912	0.0154992	1.2863	137
GO:0015718	BP	monocarboxylic acid transport	0.00159145	0.0158817	1.91316	24
GO:0031349	BP	positive regulation of defense response	0.00160119	0.0159378	1.49504	57
GO:0006029	BP	proteoglycan metabolic process	0.00164387	0.0163207	3.13621	9
GO:0030104	BP	water homeostasis	0.00165378	0.0163771	1.85442	26
GO:0000256	BP	allantoin catabolic process	0.00169577	0.0166651	4.3046	6
GO:0015808	BP	L-alanine transport	0.00169577	0.0166651	4.3046	6
GO:0032328	BP	alanine transport	0.00169577	0.0166651	4.3046	6
GO:0006002	BP	fructose 6-phosphate metabolic process	0.00173972	0.0170536	2.9039	10
GO:0009629	BP	response to gravity	0.00177896	0.0173943	1.6806	35
GO:0015729	BP	oxaloacetate transport	0.00179211	0.0174348	5.08182	5
GO:0071423	BP	malate transmembrane transport	0.00179211	0.0174348	5.08182	5
GO:0009225	BP	nucleotide-sugar metabolic process	0.00185698	0.0180206	1.92135	23
GO:0006563	BP	L-serine metabolic process	0.00193562	0.0187368	2.37152	14
GO:0032958	BP	inositol phosphate biosynthetic process	0.00203418	0.0195929	3.04909	9
GO:1902475	BP	L-alpha-amino acid transmembrane transport	0.00203418	0.0195929	3.04909	9
GO:0009226	BP	nucleotide-sugar biosynthetic process	0.00208049	0.0199398	2.05072	19
GO:0010540	BP	basipetal auxin transport	0.00208049	0.0199398	2.05072	19
GO:1900150	BP	regulation of defense response to fungus	0.00212996	0.0203635	1.69109	33
GO:0009835	BP	fruit ripening	0.0022024	0.0210041	1.9994	20
GO:0016115	BP	terpenoid catabolic process	0.00221708	0.0210922	2.33903	14
GO:0030004	BP	cellular monovalent inorganic cation homeostasis	0.00230811	0.0217976	2.03273	19
GO:0019220	BP	regulation of phosphate metabolic process	0.00230696	0.0217976	1.42012	68
GO:0051174	BP	regulation of phosphorus metabolic process	0.00230696	0.0217976	1.42012	68
GO:0001504	BP	neurotransmitter uptake	0.00236835	0.0220969	4.06545	6
GO:0006522	BP	alanine metabolic process	0.00236835	0.0220969	4.06545	6
GO:0009078	BP	pyruvate family amino acid metabolic process	0.00236835	0.0220969	4.06545	6
GO:0089718	BP	amino acid import across plasma membrane	0.00236835	0.0220969	4.06545	6
GO:0098712	BP	L-glutamate import across plasma membrane	0.00236835	0.0220969	4.06545	6
GO:0019184	BP	nonribosomal peptide biosynthetic process	0.00241291	0.0224587	6.09818	4
GO:0019344	BP	cysteine biosynthetic process	0.0024524	0.0227714	2.40231	13
GO:0006885	BP	regulation of pH	0.00263376	0.024397	1.7338	29
GO:0034284	BP	response to monosaccharide	0.00277421	0.0255756	1.92574	21
GO:0002682	BP	regulation of immune system process	0.00277367	0.0255756	1.40188	70
GO:2001023	BP	regulation of response to drug	0.00284365	0.0260915	1.88958	22
GO:2001038	BP	regulation of cellular response to drug	0.00284365	0.0260915	1.88958	22
GO:0050832	BP	defense response to fungus	0.00289454	0.0264957	1.28057	124
GO:0008299	BP	isoprenoid biosynthetic process	0.0030474	0.0278291	1.38946	72
GO:0071230	BP	cellular response to amino acid stimulus	0.0030868	0.0281226	2.07338	17
GO:0010731	BP	protein glutathionylation	0.0032233	0.0292972	3.85148	6
GO:0009696	BP	salicylic acid metabolic process	0.00325149	0.0294842	2.17792	15
GO:0016114	BP	terpenoid biosynthetic process	0.00351732	0.0318202	1.41505	63
GO:0009630	BP	gravitropism	0.00361228	0.0326031	1.6361	33
GO:0016102	BP	diterpenoid biosynthetic process	0.00367409	0.0330839	1.75196	26
GO:0009852	BP	auxin catabolic process	0.00394202	0.0354142	4.35584	5
GO:0010444	BP	guard mother cell differentiation	0.00406192	0.0361557	5.42061	4
GO:0031539	BP	positive regulation of anthocyanin metabolic process	0.00406192	0.0361557	5.42061	4
GO:1900367	BP	positive regulation of defense response to insect	0.00406192	0.0361557	5.42061	4
GO:0006561	BP	proline biosynthetic process	0.00404567	0.0361557	3.28364	7
GO:0006323	BP	DNA packaging	0.004113	0.0365264	2.36059	12
GO:0043647	BP	inositol phosphate metabolic process	0.0041902	0.0371269	2.26504	13
GO:0010227	BP	floral organ abscission	0.00428853	0.037825	3.65891	6
GO:0043605	BP	cellular amide catabolic process	0.00428853	0.037825	3.65891	6
GO:0009967	BP	positive regulation of signal transduction	0.00431887	0.0380061	1.4193	59
GO:0006950	BP	response to stress	0.00439096	0.0385528	1.06543	1292
GO:0030641	BP	regulation of cellular pH	0.00441895	0.0386234	2.05412	16
GO:0051453	BP	regulation of intracellular pH	0.00441895	0.0386234	2.05412	16
GO:0006970	BP	response to osmotic stress	0.00449401	0.039191	1.18539	225
GO:0018298	BP	protein-chromophore linkage	0.00450505	0.039199	1.62618	32
GO:0009992	BP	cellular water homeostasis	0.00471468	0.040931	1.84262	21
GO:0008277	BP	regulation of G protein-coupled receptor signaling pathway	0.00485443	0.0417697	7.31782	3
GO:0009187	BP	cyclic nucleotide metabolic process	0.00485443	0.0417697	7.31782	3
GO:1903795	BP	regulation of inorganic anion transmembrane transport	0.00485443	0.0417697	7.31782	3
GO:2000185	BP	regulation of phosphate transmembrane transport	0.00485443	0.0417697	7.31782	3
GO:0018208	BP	peptidyl-proline modification	0.00511515	0.0439155	2.07893	15
GO:0046352	BP	disaccharide catabolic process	0.00521887	0.0447068	2.67725	9
GO:0009958	BP	positive gravitropism	0.00523832	0.0447744	2.39571	11
GO:0015696	BP	ammonium transport	0.00531919	0.0450676	2.86973	8
GO:0031936	BP	negative regulation of chromatin silencing	0.00531919	0.0450676	2.86973	8
GO:0048262	BP	determination of dorsal/ventral asymmetry	0.00531919	0.0450676	2.86973	8
GO:0023056	BP	positive regulation of signaling	0.00531428	0.0450676	1.40544	59
GO:0009746	BP	response to hexose	0.00546362	0.0461902	1.88399	19
GO:0090610	BP	bundle sheath cell fate specification	0.00551734	0.0464416	4.06545	5
GO:2000469	BP	negative regulation of peroxidase activity	0.00551734	0.0464416	4.06545	5
GO:0042454	BP	ribonucleoside catabolic process	0.00559246	0.0468702	3.48468	6
GO:0080006	BP	internode patterning	0.00559246	0.0468702	3.48468	6
GO:0019722	BP	calcium-mediated signaling	0.00589144	0.0492693	1.73203	24
GO:0009069	BP	serine family amino acid metabolic process	0.00596916	0.0498116	1.75323	23
GO:0016021	CC	integral component of membrane	2.29e-22	1.33e-19	1.20798	1866
GO:0031224	CC	intrinsic component of membrane	8.88e-22	2.58e-19	1.19897	1932
GO:0005886	CC	plasma membrane	5.76e-19	1.12e-16	1.24922	1271
GO:0044425	CC	membrane part	2.75e-12	4.01e-10	1.13299	2032
GO:0016020	CC	membrane	2.14e-10	2.49e-08	1.11684	2087
GO:0005774	CC	vacuolar membrane	1.89e-06	0.000183444	1.362	221
GO:0044437	CC	vacuolar part	3.07e-06	0.000255018	1.35044	223
GO:0005887	CC	integral component of plasma membrane	2.16e-05	0.00156779	1.59252	82
GO:0031969	CC	chloroplast membrane	0.000140602	0.00909226	1.43487	104
GO:0009503	CC	thylakoid light-harvesting complex	0.000550953	0.018862	12.1964	3
GO:0009517	CC	PSII associated light-harvesting complex II	0.000550953	0.018862	12.1964	3
GO:0009783	CC	photosystem II antenna complex	0.000550953	0.018862	12.1964	3
GO:0030076	CC	light-harvesting complex	0.000550953	0.018862	12.1964	3
GO:0071627	CC	integral component of fungal-type vacuolar membrane	0.000550953	0.018862	12.1964	3
GO:0071628	CC	intrinsic component of fungal-type vacuolar membrane	0.000550953	0.018862	12.1964	3
GO:0009522	CC	photosystem I	0.00047336	0.018862	2.04637	25
GO:0042170	CC	plastid membrane	0.000505464	0.018862	1.38474	104
GO:0000329	CC	fungal-type vacuole membrane	0.000791398	0.0255885	4.87855	6
GO:0022857	MF	transmembrane transporter activity	2.62749e-25	4.37214e-22	1.52687	576
GO:0015318	MF	inorganic molecular entity transmembrane transporter activity	5.30146e-23	4.41081e-20	1.66636	376
GO:0005342	MF	organic acid transmembrane transporter activity	3.24865e-21	1.09964e-18	2.70463	106
GO:0046943	MF	carboxylic acid transmembrane transporter activity	3.24865e-21	1.09964e-18	2.70463	106
GO:0004674	MF	protein serine/threonine kinase activity	3.30421e-21	1.09964e-18	1.42021	667
GO:0015075	MF	ion transmembrane transporter activity	5.83932e-21	1.2518e-18	1.63001	369
GO:0005215	MF	transporter activity	6.01826e-21	1.2518e-18	1.45079	595
GO:0003824	MF	catalytic activity	5.17087e-21	1.2518e-18	1.11504	3404
GO:0003700	MF	DNA-binding transcription factor activity	3.28272e-20	6.06938e-18	1.48435	517
GO:0016301	MF	kinase activity	8.18161e-20	1.36142e-17	1.36341	770
GO:0004364	MF	glutathione transferase activity	3.86985e-19	5.54505e-17	2.92572	83
GO:0008514	MF	organic anion transmembrane transporter activity	3.99883e-19	5.54505e-17	2.40664	118
GO:0016740	MF	transferase activity	6.37506e-19	8.16008e-17	1.20783	1627
GO:0016773	MF	phosphotransferase activity, alcohol group as acceptor	7.2881e-19	8.66242e-17	1.3615	739
GO:0004672	MF	protein kinase activity	1.12189e-18	1.24455e-16	1.37547	692
GO:0008509	MF	anion transmembrane transporter activity	2.34204e-18	2.43572e-16	2.06762	158
GO:0046873	MF	metal ion transmembrane transporter activity	3.47881e-17	3.40514e-15	2.17082	131
GO:0015291	MF	secondary active transmembrane transporter activity	4.68436e-16	4.33043e-14	1.74922	218
GO:0016765	MF	transferase activity, transferring alkyl or aryl (other than methyl) groups	1.60288e-15	1.40378e-13	2.1965	114
GO:0015171	MF	amino acid transmembrane transporter activity	2.07651e-15	1.72765e-13	2.80837	70
GO:0140110	MF	transcription regulator activity	3.78081e-15	2.99585e-13	1.39107	525
GO:0016772	MF	transferase activity, transferring phosphorus-containing groups	1.09561e-14	8.28677e-13	1.29094	793
GO:0016758	MF	transferase activity, transferring hexosyl groups	1.20828e-14	8.74163e-13	1.60526	266
GO:0051213	MF	dioxygenase activity	6.98473e-14	4.84274e-12	2.01378	124
GO:0030246	MF	carbohydrate binding	9.64889e-13	6.4223e-11	1.50851	294
GO:0016491	MF	oxidoreductase activity	1.82741e-12	1.16954e-10	1.25946	797
GO:0015293	MF	symporter activity	3.10921e-12	1.91619e-10	1.88197	129
GO:0008194	MF	UDP-glycosyltransferase activity	2.14062e-11	1.27214e-09	1.65848	178
GO:0022804	MF	active transmembrane transporter activity	2.97211e-11	1.70538e-09	1.47287	285
GO:0008324	MF	cation transmembrane transporter activity	8.88138e-11	4.92621e-09	1.50902	243
GO:0016757	MF	transferase activity, transferring glycosyl groups	1.78262e-10	9.56866e-09	1.4389	294
GO:0004709	MF	MAP kinase kinase kinase activity	2.9976e-10	1.51152e-08	3.62268	30
GO:0050662	MF	coenzyme binding	2.93665e-10	1.51152e-08	1.48472	247
GO:0004067	MF	asparaginase activity	7.71207e-10	3.77438e-08	10.1636	10
GO:0016705	MF	oxidoreductase activity, acting on paired donors, with incorporation or reduction of molecular oxygen	1.59926e-09	7.60334e-08	1.45291	251
GO:0022890	MF	inorganic cation transmembrane transporter activity	1.69538e-09	7.83643e-08	1.49316	220
GO:0038023	MF	signaling receptor activity	1.8388e-09	8.26962e-08	1.57814	173
GO:0016620	MF	oxidoreductase activity, acting on the aldehyde or oxo group of donors, NAD or NADP as acceptor	2.24975e-09	9.85152e-08	2.42065	52
GO:0004888	MF	transmembrane signaling receptor activity	3.07032e-09	1.31e-07	1.6226	151
GO:0031418	MF	L-ascorbic acid binding	3.40504e-09	1.4165e-07	2.98512	35
GO:0048037	MF	cofactor binding	3.72883e-09	1.51336e-07	1.26138	565
GO:0035251	MF	UDP-glucosyltransferase activity	1.02443e-08	4.05868e-07	1.68039	124
GO:0018685	MF	alkane 1-monooxygenase activity	1.51047e-08	5.84519e-07	6.34211	13
GO:0046527	MF	glucosyltransferase activity	1.66298e-08	6.28909e-07	1.60657	142
GO:0043565	MF	sequence-specific DNA binding	1.81199e-08	6.70035e-07	1.3519	323
GO:0008798	MF	beta-aspartyl-peptidase activity	2.0604e-08	7.45328e-07	7.45333	11
GO:0031406	MF	carboxylic acid binding	2.3706e-08	8.21808e-07	2.15667	58
GO:0043177	MF	organic acid binding	2.3706e-08	8.21808e-07	2.15667	58
GO:0047334	MF	diphosphate-fructose-6-phosphate 1-phosphotransferase activity	2.91317e-08	9.89287e-07	9.14727	9
GO:0045486	MF	naringenin 3-dioxygenase activity	4.22428e-08	1.40131e-06	5.50804	14
GO:0080044	MF	quercetin 7-O-glucosyltransferase activity	4.29487e-08	1.40131e-06	2.20617	53
GO:0004497	MF	monooxygenase activity	4.63099e-08	1.48192e-06	1.4249	227
GO:0080043	MF	quercetin 3-O-glucosyltransferase activity	4.82445e-08	1.5147e-06	2.19866	53
GO:0016645	MF	oxidoreductase activity, acting on the CH-NH group of donors	5.24863e-08	1.61736e-06	2.795	33
GO:0015140	MF	malate transmembrane transporter activity	6.94009e-08	2.09969e-06	5.33591	14
GO:0046915	MF	transition metal ion transmembrane transporter activity	1.07482e-07	3.13771e-06	2.36236	43
GO:0016903	MF	oxidoreductase activity, acting on the aldehyde or oxo group of donors	1.0609e-07	3.13771e-06	2.02719	61
GO:0005385	MF	zinc ion transmembrane transporter activity	1.40962e-07	3.97562e-06	3.37972	23
GO:0072509	MF	divalent inorganic cation transmembrane transporter activity	1.40962e-07	3.97562e-06	3.37972	23
GO:0048029	MF	monosaccharide binding	1.52936e-07	4.24143e-06	2.23918	47
GO:0005262	MF	calcium channel activity	2.06742e-07	5.63966e-06	2.85238	29
GO:0015079	MF	potassium ion transmembrane transporter activity	2.18448e-07	5.86287e-06	2.21324	47
GO:0016629	MF	12-oxophytodienoate reductase activity	2.76381e-07	7.29996e-06	4.57364	15
GO:0016706	MF	oxidoreductase activity, acting on paired donors, with incorporation or reduction of molecular oxygen, 2-oxoglutarate as one donor, and incorporation of one atom each of oxygen into both donors	3.09923e-07	7.93404e-06	2.20879	46
GO:0015295	MF	solute:proton symporter activity	3.07682e-07	7.93404e-06	1.77638	82
GO:0015926	MF	glucosidase activity	4.17813e-07	1.05339e-05	1.79156	78
GO:0015294	MF	solute:cation symporter activity	4.74531e-07	1.17854e-05	1.75138	83
GO:0019199	MF	transmembrane receptor protein kinase activity	4.87296e-07	1.19244e-05	1.5672	124
GO:0019842	MF	vitamin binding	6.91008e-07	1.66643e-05	1.74851	81
GO:0060089	MF	molecular transducer activity	7.1795e-07	1.70667e-05	1.4224	188
GO:0005506	MF	iron ion binding	7.68091e-07	1.80015e-05	1.37632	224
GO:0015556	MF	C4-dicarboxylate transmembrane transporter activity	8.87319e-07	2.05069e-05	4.4934	14
GO:0005310	MF	dicarboxylic acid transmembrane transporter activity	9.21405e-07	2.1003e-05	2.98686	24
GO:0015085	MF	calcium ion transmembrane transporter activity	9.62671e-07	2.16471e-05	2.28682	39
GO:0004664	MF	prephenate dehydratase activity	1.16561e-06	2.55208e-05	6.09818	10
GO:0047769	MF	arogenate dehydratase activity	1.16561e-06	2.55208e-05	6.09818	10
GO:0022838	MF	substrate-specific channel activity	1.30264e-06	2.81506e-05	1.79284	71
GO:0080030	MF	methyl indole-3-acetate esterase activity	2.52747e-06	5.39193e-05	2.22818	38
GO:0015276	MF	ligand-gated ion channel activity	4.05378e-06	8.43187e-05	2.69831	25
GO:0022834	MF	ligand-gated channel activity	4.05378e-06	8.43187e-05	2.69831	25
GO:0035673	MF	oligopeptide transmembrane transporter activity	4.94469e-06	0.00010158	1.9012	53
GO:0003872	MF	6-phosphofructokinase activity	5.67845e-06	0.000115231	4.17244	13
GO:0005516	MF	calmodulin binding	6.7302e-06	0.000133322	1.48447	125
GO:0005509	MF	calcium ion binding	6.67584e-06	0.000133322	1.41305	160
GO:0004675	MF	transmembrane receptor protein serine/threonine kinase activity	6.91622e-06	0.000135395	1.52628	110
GO:0008422	MF	beta-glucosidase activity	1.25214e-05	0.000242274	1.7504	62
GO:0005261	MF	cation channel activity	1.26849e-05	0.000242616	2.04123	40
GO:0005544	MF	calcium-dependent phospholipid binding	1.35658e-05	0.000255078	3.18982	17
GO:0016616	MF	oxidoreductase activity, acting on the CH-OH group of donors, NAD or NADP as acceptor	1.3643e-05	0.000255078	1.53213	101
GO:0005216	MF	ion channel activity	1.4875e-05	0.000275022	1.78713	57
GO:0015267	MF	channel activity	1.77835e-05	0.00032165	1.62759	77
GO:0022803	MF	passive transmembrane transporter activity	1.77835e-05	0.00032165	1.62759	77
GO:0000828	MF	inositol hexakisphosphate kinase activity	2.06842e-05	0.000344186	10.1636	5
GO:0000829	MF	inositol heptakisphosphate kinase activity	2.06842e-05	0.000344186	10.1636	5
GO:0000832	MF	inositol hexakisphosphate 5-kinase activity	2.06842e-05	0.000344186	10.1636	5
GO:0033857	MF	diphosphoinositol-pentakisphosphate kinase activity	2.06842e-05	0.000344186	10.1636	5
GO:0052723	MF	inositol hexakisphosphate 1-kinase activity	2.06842e-05	0.000344186	10.1636	5
GO:0052724	MF	inositol hexakisphosphate 3-kinase activity	2.06842e-05	0.000344186	10.1636	5
GO:0102092	MF	5-diphosphoinositol pentakisphosphate 3-kinase activity	2.06842e-05	0.000344186	10.1636	5
GO:0046510	MF	UDP-sulfoquinovose:DAG sulfoquinovosyltransferase activity	2.04751e-05	0.000344186	8.13091	6
GO:0000014	MF	single-stranded DNA endodeoxyribonuclease activity	2.40593e-05	0.000396382	3.95558	12
GO:0016829	MF	lyase activity	2.59739e-05	0.000423731	1.3689	166
GO:0008242	MF	omega peptidase activity	2.8288e-05	0.000452608	4.1925	11
GO:0120091	MF	jasmonic acid hydrolase	2.8288e-05	0.000452608	4.1925	11
GO:0102483	MF	scopolin beta-glucosidase activity	2.99122e-05	0.000474037	2.21752	30
GO:0015238	MF	drug transmembrane transporter activity	3.10711e-05	0.000487757	1.69927	62
GO:0008443	MF	phosphofructokinase activity	3.41004e-05	0.000530309	3.60347	13
GO:0016621	MF	cinnamoyl-CoA reductase activity	3.66377e-05	0.000564492	2.55543	22
GO:0016638	MF	oxidoreductase activity, acting on the CH-NH2 group of donors	3.8416e-05	0.000586461	2.61351	21
GO:0015292	MF	uniporter activity	4.19469e-05	0.000628825	5.42061	8
GO:0017172	MF	cysteine dioxygenase activity	4.19469e-05	0.000628825	5.42061	8
GO:0099094	MF	ligand-gated cation channel activity	5.07426e-05	0.000753889	6.09818	7
GO:0009916	MF	alternative oxidase activity	6.72336e-05	0.000981374	5.13531	8
GO:0102721	MF	ubiquinol:oxygen oxidoreductase activity	6.72336e-05	0.000981374	5.13531	8
GO:0043295	MF	glutathione binding	7.13206e-05	0.00102308	2.51102	21
GO:1900750	MF	oligopeptide binding	7.13206e-05	0.00102308	2.51102	21
GO:0004708	MF	MAP kinase kinase activity	7.52762e-05	0.00106712	3.56967	12
GO:0016641	MF	oxidoreductase activity, acting on the CH-NH2 group of donors, oxygen as acceptor	7.56734e-05	0.00106712	3.04909	15
GO:0008378	MF	galactosyltransferase activity	7.71929e-05	0.0010794	2.21008	27
GO:0016647	MF	oxidoreductase activity, acting on the CH-NH group of donors, oxygen as acceptor	9.68601e-05	0.00134313	3.72667	11
GO:0016835	MF	carbon-oxygen lyase activity	0.000110019	0.00151299	1.50682	85
GO:0004834	MF	tryptophan synthase activity	0.000120646	0.00164554	3.93431	10
GO:0030410	MF	nicotianamine synthase activity	0.00012766	0.00172705	3.62595	11
GO:0080046	MF	quercetin 4'-O-glucosyltransferase activity	0.000159446	0.00213966	3.32628	12
GO:0004553	MF	hydrolase activity, hydrolyzing O-glycosyl compounds	0.000173156	0.00230505	1.31599	168
GO:0047987	MF	hydroperoxide dehydratase activity	0.000181299	0.00239429	6.09818	6
GO:0022839	MF	ion gated channel activity	0.000210425	0.00275706	1.72625	46
GO:0004029	MF	aldehyde dehydrogenase (NAD) activity	0.000252146	0.00326938	3.18166	12
GO:0004564	MF	beta-fructofuranosidase activity	0.000253455	0.00326938	2.25479	22
GO:0015297	MF	antiporter activity	0.000256809	0.00328716	1.49578	78
GO:0043878	MF	glyceraldehyde-3-phosphate dehydrogenase (NAD+) (non-phosphorylating) activity	0.000274315	0.00348443	3.354	11
GO:0016701	MF	oxidoreductase activity, acting on single donors with incorporation of molecular oxygen	0.000318242	0.00401178	1.92902	31
GO:0004103	MF	choline kinase activity	0.00035166	0.00436688	6.77576	5
GO:0045552	MF	dihydrokaempferol 4-reductase activity	0.00035166	0.00436688	6.77576	5
GO:0022836	MF	gated channel activity	0.00037221	0.00458783	1.66314	48
GO:0015333	MF	peptide:proton symporter activity	0.00038606	0.00472356	1.71387	43
GO:0015172	MF	acidic amino acid transmembrane transporter activity	0.000398978	0.00484598	2.65138	15
GO:0016614	MF	oxidoreductase activity, acting on CH-OH group of donors	0.000412639	0.00497559	1.39047	105
GO:0004022	MF	alcohol dehydrogenase (NAD) activity	0.000472943	0.00556225	3.38788	10
GO:0009815	MF	1-aminocyclopropane-1-carboxylate oxidase activity	0.000472943	0.00556225	3.38788	10
GO:0045551	MF	cinnamyl-alcohol dehydrogenase activity	0.000474663	0.00556225	2.98686	12
GO:0052747	MF	sinapyl alcohol dehydrogenase activity	0.000474663	0.00556225	2.98686	12
GO:0004001	MF	adenosine kinase activity	0.000550953	0.00572991	12.1964	3
GO:0004357	MF	glutamate-cysteine ligase activity	0.000550953	0.00572991	12.1964	3
GO:0004612	MF	phosphoenolpyruvate carboxykinase (ATP) activity	0.000550953	0.00572991	12.1964	3
GO:0004657	MF	proline dehydrogenase activity	0.000550953	0.00572991	12.1964	3
GO:0004851	MF	uroporphyrin-III C-methyltransferase activity	0.000550953	0.00572991	12.1964	3
GO:0009978	MF	allene oxide synthase activity	0.000550953	0.00572991	12.1964	3
GO:0010331	MF	gibberellin binding	0.000550953	0.00572991	12.1964	3
GO:0016664	MF	oxidoreductase activity, acting on other nitrogenous compounds as donors, iron-sulfur protein as acceptor	0.000550953	0.00572991	12.1964	3
GO:0033741	MF	adenylyl-sulfate reductase (glutathione) activity	0.000550953	0.00572991	12.1964	3
GO:0043115	MF	precorrin-2 dehydrogenase activity	0.000550953	0.00572991	12.1964	3
GO:0046423	MF	allene-oxide cyclase activity	0.000550953	0.00572991	12.1964	3
GO:0048307	MF	ferredoxin-nitrite reductase activity	0.000550953	0.00572991	12.1964	3
GO:0050515	MF	4-(cytidine 5'-diphospho)-2-C-methyl-D-erythritol kinase activity	0.000550953	0.00572991	12.1964	3
GO:0098809	MF	nitrite reductase activity	0.000550953	0.00572991	12.1964	3
GO:1990929	MF	sulfoquinovosidase activity	0.000550953	0.00572991	12.1964	3
GO:0043765	MF	T/G mismatch-specific endonuclease activity	0.000510192	0.00572991	5.22701	6
GO:0047216	MF	inositol 3-alpha-galactosyltransferase activity	0.000510192	0.00572991	5.22701	6
GO:0043168	MF	anion binding	0.000500507	0.00572991	1.07768	1428
GO:0009671	MF	nitrate:proton symporter activity	0.000591532	0.00582432	8.13091	4
GO:0032791	MF	lead ion binding	0.000591532	0.00582432	8.13091	4
GO:0033188	MF	sphingomyelin synthase activity	0.000591532	0.00582432	8.13091	4
GO:0045140	MF	inositol phosphoceramide synthase activity	0.000591532	0.00582432	8.13091	4
GO:0047493	MF	ceramide cholinephosphotransferase activity	0.000591532	0.00582432	8.13091	4
GO:0102145	MF	(3R)-(E)-nerolidol synthase activity	0.000591532	0.00582432	8.13091	4
GO:0072341	MF	modified amino acid binding	0.000587	0.00582432	2.17054	21
GO:0005351	MF	carbohydrate:proton symporter activity	0.000578362	0.00582432	1.88604	30
GO:0005402	MF	carbohydrate:cation symporter activity	0.000578362	0.00582432	1.88604	30
GO:0043167	MF	ion binding	0.000619779	0.00606654	1.05016	2491
GO:0090482	MF	vitamin transmembrane transporter activity	0.0006332	0.00612584	3.54088	9
GO:1990714	MF	hydroxyproline O-galactosyltransferase activity	0.0006332	0.00612584	3.54088	9
GO:0005242	MF	inward rectifier potassium channel activity	0.000655709	0.00630694	6.09818	5
GO:0015145	MF	monosaccharide transmembrane transporter activity	0.000678985	0.00649329	2.62691	14
GO:0004097	MF	catechol oxidase activity	0.000737764	0.00701509	4.26873	7
GO:0016836	MF	hydro-lyase activity	0.000780424	0.00737856	1.56895	53
GO:0004575	MF	sucrose alpha-glucosidase activity	0.000797517	0.00749756	2.58711	14
GO:0045548	MF	phenylalanine ammonia-lyase activity	0.000831587	0.00777394	2.68733	13
GO:0033926	MF	glycopeptide alpha-N-acetylgalactosaminidase activity	0.00102869	0.00956281	4.06545	7
GO:0004970	MF	ionotropic glutamate receptor activity	0.00108331	0.00974391	2.21752	18
GO:0005230	MF	extracellular ligand-gated ion channel activity	0.00108331	0.00974391	2.21752	18
GO:0008066	MF	glutamate receptor activity	0.00108331	0.00974391	2.21752	18
GO:0022824	MF	transmitter-gated ion channel activity	0.00108331	0.00974391	2.21752	18
GO:0022835	MF	transmitter-gated channel activity	0.00108331	0.00974391	2.21752	18
GO:0030594	MF	neurotransmitter receptor activity	0.00108331	0.00974391	2.21752	18
GO:0004356	MF	glutamate-ammonia ligase activity	0.00112094	0.00997454	5.5438	5
GO:0016211	MF	ammonia ligase activity	0.00112094	0.00997454	5.5438	5
GO:0015651	MF	quaternary ammonium group transmembrane transporter activity	0.00117865	0.0102684	4.57364	6
GO:0090416	MF	nicotinate transmembrane transporter activity	0.00117865	0.0102684	4.57364	6
GO:0090417	MF	N-methylnicotinate transmembrane transporter activity	0.00117865	0.0102684	4.57364	6
GO:0045543	MF	gibberellin 2-beta-dioxygenase activity	0.00116539	0.0102684	3.04909	10
GO:1904680	MF	peptide transmembrane transporter activity	0.00118727	0.0102897	1.51458	57
GO:0015149	MF	hexose transmembrane transporter activity	0.00121161	0.0104462	2.85447	11
GO:0016798	MF	hydrolase activity, acting on glycosyl bonds	0.00123175	0.0105651	1.25127	178
GO:0047890	MF	flavanone 4-reductase activity	0.00129029	0.0110105	6.96935	4
GO:0015101	MF	organic cation transmembrane transporter activity	0.00141624	0.0120236	3.48468	8
GO:0015077	MF	monovalent inorganic cation transmembrane transporter activity	0.00151587	0.0128041	1.28579	138
GO:0015193	MF	L-proline transmembrane transporter activity	0.00169577	0.0141088	4.3046	6
GO:0015194	MF	L-serine transmembrane transporter activity	0.00169577	0.0141088	4.3046	6
GO:0022889	MF	serine transmembrane transporter activity	0.00169577	0.0141088	4.3046	6
GO:0008115	MF	sarcosine oxidase activity	0.00179211	0.0142003	5.08182	5
GO:0008131	MF	primary amine oxidase activity	0.00179211	0.0142003	5.08182	5
GO:0015131	MF	oxaloacetate transmembrane transporter activity	0.00179211	0.0142003	5.08182	5
GO:0052593	MF	tryptamine:oxygen oxidoreductase (deaminating) activity	0.00179211	0.0142003	5.08182	5
GO:0052594	MF	aminoacetone:oxygen oxidoreductase(deaminating) activity	0.00179211	0.0142003	5.08182	5
GO:0052595	MF	aliphatic-amine oxidase activity	0.00179211	0.0142003	5.08182	5
GO:0052596	MF	phenethylamine:oxygen oxidoreductase (deaminating) activity	0.00179211	0.0142003	5.08182	5
GO:0005355	MF	glucose transmembrane transporter activity	0.00173972	0.0142003	2.9039	10
GO:0015146	MF	pentose transmembrane transporter activity	0.00173972	0.0142003	2.9039	10
GO:0042578	MF	phosphoric ester hydrolase activity	0.00176231	0.0142003	1.28433	135
GO:0005381	MF	iron ion transmembrane transporter activity	0.00183695	0.0144866	2.47739	13
GO:0016841	MF	ammonia-lyase activity	0.00193562	0.0151928	2.37152	14
GO:0008028	MF	monocarboxylic acid transmembrane transporter activity	0.00197382	0.0154199	1.94435	22
GO:0052684	MF	L-serine hydro-lyase (adding indole, L-tryptophan-forming) activity	0.00206835	0.0160829	9.14727	3
GO:0016168	MF	chlorophyll binding	0.00230216	0.0178177	1.81203	26
GO:0015186	MF	L-glutamine transmembrane transporter activity	0.00236835	0.018161	4.06545	6
GO:0016207	MF	4-coumarate-CoA ligase activity	0.00236835	0.018161	4.06545	6
GO:0004349	MF	glutamate 5-kinase activity	0.00241291	0.0182504	6.09818	4
GO:0004350	MF	glutamate-5-semialdehyde dehydrogenase activity	0.00241291	0.0182504	6.09818	4
GO:0005337	MF	nucleoside transmembrane transporter activity	0.00241291	0.0182504	6.09818	4
GO:0008309	MF	double-stranded DNA exodeoxyribonuclease activity	0.00246097	0.0183635	3.55727	7
GO:0016661	MF	oxidoreductase activity, acting on other nitrogenous compounds as donors	0.00246097	0.0183635	3.55727	7
GO:0033984	MF	indole-3-glycerol-phosphate lyase activity	0.00246097	0.0183635	3.55727	7
GO:0016713	MF	oxidoreductase activity, acting on paired donors, with incorporation or reduction of molecular oxygen, reduced iron-sulfur protein as one donor, and incorporation of one atom of oxygen	0.00281817	0.020935	2.36646	13
GO:0022821	MF	potassium ion antiporter activity	0.00288562	0.0213408	2.20416	15
GO:0036094	MF	small molecule binding	0.00291739	0.0214803	1.06516	1408
GO:0004805	MF	trehalose-phosphatase activity	0.00303456	0.0222445	2.88861	9
GO:0005313	MF	L-glutamate transmembrane transporter activity	0.00310257	0.0226433	2.43927	12
GO:1901681	MF	sulfur compound binding	0.00312881	0.0227351	1.75161	27
GO:0015179	MF	L-amino acid transmembrane transporter activity	0.00318594	0.0230496	2.12111	16
GO:0015175	MF	neutral amino acid transmembrane transporter activity	0.00322726	0.0232475	2.33166	13
GO:0140096	MF	catalytic activity, acting on a protein	0.00325363	0.0233364	1.07829	1039
GO:0003993	MF	acid phosphatase activity	0.00340655	0.0243283	1.7617	26
GO:0042887	MF	amide transmembrane transporter activity	0.00351225	0.024976	1.43778	58
GO:0019200	MF	carbohydrate kinase activity	0.00369039	0.0261311	1.85048	22
GO:0046906	MF	tetrapyrrole binding	0.00379836	0.0267817	1.17298	264
GO:0016880	MF	acid-ammonia (or amide) ligase activity	0.00394202	0.0276773	4.35584	5
GO:0005217	MF	intracellular ligand-gated ion channel activity	0.00406192	0.0280458	5.42061	4
GO:0005221	MF	intracellular cyclic nucleotide activated cation channel activity	0.00406192	0.0280458	5.42061	4
GO:0043855	MF	cyclic nucleotide-gated ion channel activity	0.00406192	0.0280458	5.42061	4
GO:0050736	MF	O-malonyltransferase activity	0.00404567	0.0280458	3.28364	7
GO:0008519	MF	ammonium transmembrane transporter activity	0.00420436	0.0289093	2.59497	10
GO:0052634	MF	C-19 gibberellin 2-beta-dioxygenase activity	0.00428853	0.0293667	3.65891	6
GO:0015103	MF	inorganic anion transmembrane transporter activity	0.00450966	0.0307544	1.52002	42
GO:0004427	MF	inorganic diphosphatase activity	0.00453935	0.0308305	2.43927	11
GO:0016405	MF	CoA-ligase activity	0.00458351	0.0310039	2.10282	15
GO:0004112	MF	cyclic-nucleotide phosphodiesterase activity	0.00485443	0.0325717	7.31782	3
GO:0004113	MF	2',3'-cyclic-nucleotide 3'-phosphodiesterase activity	0.00485443	0.0325717	7.31782	3
GO:0019139	MF	cytokinin dehydrogenase activity	0.00521887	0.0348763	2.67725	9
GO:0050403	MF	trans-zeatin O-beta-D-glucosyltransferase activity	0.00531919	0.0354045	2.86973	8
GO:0090599	MF	alpha-glucosidase activity	0.00543912	0.0360585	2.01177	16
GO:0003883	MF	CTP synthase activity	0.00551734	0.0362879	4.06545	5
GO:0015296	MF	anion:cation symporter activity	0.00551734	0.0362879	4.06545	5
GO:0015205	MF	nucleobase transmembrane transporter activity	0.0056956	0.0373129	2.05557	15
GO:0016830	MF	carbon-carbon lyase activity	0.00589757	0.0384845	1.40727	57
GO:0016709	MF	oxidoreductase activity, acting on paired donors, with incorporation or reduction of molecular oxygen, NAD(P)H as one donor, and incorporation of one atom of oxygen	0.00598313	0.0388903	1.32605	81
GO:0015513	MF	high-affinity secondary active nitrite transmembrane transporter activity	0.00633273	0.0404139	4.87855	4
GO:0017046	MF	peptide hormone binding	0.00633273	0.0404139	4.87855	4
GO:0047760	MF	butyrate-CoA ligase activity	0.00633273	0.0404139	4.87855	4
GO:0034007	MF	S-linalool synthase activity	0.00630181	0.0404139	3.04909	7
GO:0010181	MF	FMN binding	0.00633895	0.0404139	1.72184	24
GO:0016628	MF	oxidoreductase activity, acting on the CH-CH group of donors, NAD or NADP as acceptor	0.00651998	0.0414093	1.67781	26
GO:0004735	MF	pyrroline-5-carboxylate reductase activity	0.00672163	0.0423666	12.1964	2
GO:0018580	MF	nitronate monooxygenase activity	0.00672163	0.0423666	12.1964	2
GO:0016682	MF	oxidoreductase activity, acting on diphenols and related substances as donors, oxygen as acceptor	0.00688771	0.0432496	1.5801	32
GO:0004353	MF	glutamate dehydrogenase [NAD(P)+] activity	0.00716365	0.0441493	3.32628	6
GO:0047893	MF	flavonol 3-O-glucosyltransferase activity	0.00716365	0.0441493	3.32628	6
GO:0102360	MF	daphnetin 3-O-glucosyltransferase activity	0.00716365	0.0441493	3.32628	6
GO:0102425	MF	myricetin 3-O-glucosyltransferase activity	0.00716365	0.0441493	3.32628	6
GO:0001653	MF	peptide receptor activity	0.00708896	0.0441493	1.83913	19
GO:0008081	MF	phosphoric diester hydrolase activity	0.00757772	0.0465289	1.74234	22
GO:0016165	MF	linoleate 13S-lipoxygenase activity	0.00772895	0.0471098	2.94395	7
GO:0016420	MF	malonyltransferase activity	0.00772895	0.0471098	2.94395	7
GO:0042562	MF	hormone binding	0.00817343	0.0496372	2.03273	14

## Sheet: N1_1Y vs. N1_1W
Accession	Term_Type	Term_name	p-value	FDR	Rich_Ratio	Number
GO:2000022	BP	regulation of jasmonic acid mediated signaling pathway	2.53467e-33	4.69167e-30	5.37759	70
GO:0010200	BP	response to chitin	2.00938e-33	4.69167e-30	3.26039	129
GO:0042493	BP	response to drug	1.97739e-29	2.4401e-26	2.07126	262
GO:0009611	BP	response to wounding	5.05469e-27	4.67811e-24	2.71559	138
GO:0010033	BP	response to organic substance	3.966e-26	2.93643e-23	1.57943	522
GO:0010243	BP	response to organonitrogen compound	4.07424e-25	2.5138e-22	2.31534	173
GO:0035556	BP	intracellular signal transduction	1.00297e-24	5.30429e-22	1.90437	271
GO:1901698	BP	response to nitrogen compound	3.1436e-23	1.4547e-20	2.10849	196
GO:1901700	BP	response to oxygen-containing compound	8.42843e-22	3.46689e-19	1.48842	553
GO:0009607	BP	response to biotic stimulus	1.39837e-19	5.17678e-17	1.49384	488
GO:0051707	BP	response to other organism	2.16546e-19	7.28777e-17	1.50796	464
GO:0042221	BP	response to chemical	2.85044e-19	8.79362e-17	1.37332	719
GO:0009873	BP	ethylene-activated signaling pathway	7.26532e-19	2.06894e-16	2.34507	124
GO:0043207	BP	response to external biotic stimulus	1.84462e-18	4.8777e-16	1.48884	466
GO:0009755	BP	hormone-mediated signaling pathway	2.1664e-16	5.34668e-14	1.54669	350
GO:0009617	BP	response to bacterium	2.05312e-15	4.75041e-13	1.63947	262
GO:0007165	BP	signal transduction	2.36623e-15	5.15282e-13	1.40464	507
GO:0006749	BP	glutathione metabolic process	2.97059e-15	6.10952e-13	2.91377	66
GO:0009719	BP	response to endogenous stimulus	5.16518e-15	1.00639e-12	1.49042	373
GO:0031098	BP	stress-activated protein kinase signaling cascade	8.48152e-15	1.56993e-12	3.98216	41
GO:0009751	BP	response to salicylic acid	2.6925e-14	4.74649e-12	2.02926	127
GO:0000160	BP	phosphorelay signal transduction system	4.04138e-14	6.50486e-12	1.95466	138
GO:0046677	BP	response to antibiotic	3.98335e-14	6.50486e-12	1.86172	158
GO:0009605	BP	response to external stimulus	5.32995e-14	8.22144e-12	1.35098	569
GO:1902221	BP	erythrose 4-phosphate/phosphoenolpyruvate family amino acid metabolic process	6.13928e-14	8.7414e-12	4.40304	34
GO:0006558	BP	L-phenylalanine metabolic process	6.13928e-14	8.7414e-12	4.40304	34
GO:0009625	BP	response to insect	7.32821e-14	1.00478e-11	5.05552	29
GO:0009725	BP	response to hormone	1.7857e-13	2.36095e-11	1.47297	350
GO:0042445	BP	hormone metabolic process	2.292e-13	2.92586e-11	1.92621	135
GO:0032147	BP	activation of protein kinase activity	4.98657e-13	6.15343e-11	3.50368	42
GO:0098542	BP	defense response to other organism	5.97412e-13	7.13426e-11	1.44655	365
GO:0031408	BP	oxylipin biosynthetic process	6.70595e-13	7.75794e-11	3.60202	40
GO:0042742	BP	defense response to bacterium	9.01527e-13	9.83111e-11	1.60756	229
GO:0051704	BP	multi-organism process	9.02912e-13	9.83111e-11	1.36684	483
GO:1900056	BP	negative regulation of leaf senescence	1.29795e-12	1.33473e-10	5.98295	22
GO:0014070	BP	response to organic cyclic compound	1.296e-12	1.33473e-10	1.79158	156
GO:0031407	BP	oxylipin metabolic process	1.33498e-12	1.3357e-10	3.53185	40
GO:0050896	BP	response to stimulus	2.08801e-12	2.03417e-10	1.15574	1632
GO:0001101	BP	response to acid chemical	2.20593e-12	2.09394e-10	1.40389	404
GO:1900055	BP	regulation of leaf senescence	2.84434e-12	2.63244e-10	4.10494	32
GO:1905622	BP	negative regulation of leaf development	5.44455e-12	4.91603e-10	5.64429	22
GO:0006468	BP	protein phosphorylation	6.61362e-12	5.82943e-10	1.45737	321
GO:0030001	BP	metal ion transport	7.08893e-12	6.10308e-10	1.94493	115
GO:0009620	BP	response to fungus	9.84873e-12	8.28636e-10	1.68645	175
GO:0023014	BP	signal transduction by protein phosphorylation	1.85227e-11	1.5238e-09	3.06818	44
GO:0009803	BP	cinnamic acid metabolic process	1.9411e-11	1.52892e-09	5.12697	23
GO:0009800	BP	cinnamic acid biosynthetic process	1.9411e-11	1.52892e-09	5.12697	23
GO:0045860	BP	positive regulation of protein kinase activity	4.26653e-11	3.29056e-09	3.08703	42
GO:0097305	BP	response to alcohol	4.81768e-11	3.63981e-09	1.6843	164
GO:0009864	BP	induced systemic resistance, jasmonic acid mediated signaling pathway	6.58647e-11	4.87662e-09	5.8717	19
GO:0015711	BP	organic anion transport	6.90636e-11	5.0132e-09	1.94519	104
GO:0009636	BP	response to toxic substance	8.96421e-11	6.38183e-09	2.13865	81
GO:0009738	BP	abscisic acid-activated signaling pathway	9.27704e-11	6.47992e-09	1.8784	113
GO:0009753	BP	response to jasmonic acid	1.40218e-10	9.61271e-09	2.35839	64
GO:2000070	BP	regulation of response to water deprivation	1.59323e-10	1.07239e-08	3.01352	41
GO:0033674	BP	positive regulation of kinase activity	2.0862e-10	1.37912e-08	2.94381	42
GO:0015849	BP	organic acid transport	3.00025e-10	1.91499e-08	2.07636	82
GO:0046942	BP	carboxylic acid transport	3.00025e-10	1.91499e-08	2.07636	82
GO:0009813	BP	flavonoid biosynthetic process	3.67925e-10	2.30857e-08	2.07813	81
GO:0009737	BP	response to abscisic acid	4.80186e-10	2.91418e-08	1.65592	156
GO:0006952	BP	defense response	4.74203e-10	2.91418e-08	1.23801	723
GO:0006811	BP	ion transport	5.8575e-10	3.49749e-08	1.45414	265
GO:0006790	BP	sulfur compound metabolic process	6.52055e-10	3.8316e-08	1.73446	131
GO:0010817	BP	regulation of hormone levels	8.08012e-10	4.67384e-08	1.58071	181
GO:0009699	BP	phenylpropanoid biosynthetic process	8.72464e-10	4.96902e-08	1.96778	89
GO:0080151	BP	positive regulation of salicylic acid mediated signaling pathway	1.06538e-09	5.97583e-08	7.05061	14
GO:0002239	BP	response to oomycetes	1.17604e-09	6.49808e-08	2.02837	81
GO:0006820	BP	anion transport	1.26018e-09	6.86056e-08	1.66666	145
GO:0016310	BP	phosphorylation	2.48367e-09	1.33254e-07	1.36251	347
GO:0033993	BP	response to lipid	2.88056e-09	1.52341e-07	1.54613	185
GO:1902222	BP	erythrose 4-phosphate/phosphoenolpyruvate family amino acid catabolic process	2.98122e-09	1.53285e-07	4.11507	23
GO:0006559	BP	L-phenylalanine catabolic process	2.98122e-09	1.53285e-07	4.11507	23
GO:0002229	BP	defense response to oomycetes	3.64934e-09	1.85066e-07	2.07421	72
GO:0006575	BP	cellular modified amino acid metabolic process	4.54318e-09	2.27282e-07	2.04102	74
GO:0044550	BP	secondary metabolite biosynthetic process	5.3103e-09	2.62116e-07	1.74761	114
GO:2001040	BP	positive regulation of cellular response to drug	6.24986e-09	3.0048e-07	6.34555	14
GO:2001025	BP	positive regulation of response to drug	6.24986e-09	3.0048e-07	6.34555	14
GO:0080187	BP	floral organ senescence	8.14571e-09	3.86608e-07	5.43904	16
GO:0031347	BP	regulation of defense response	1.02512e-08	4.80377e-07	1.67335	127
GO:0005975	BP	carbohydrate metabolic process	1.10144e-08	5.09693e-07	1.33146	367
GO:0010646	BP	regulation of cell communication	1.57153e-08	7.18248e-07	1.50551	188
GO:0009966	BP	regulation of signal transduction	1.80955e-08	8.16947e-07	1.51362	182
GO:0016054	BP	organic acid catabolic process	2.41558e-08	1.07741e-06	1.92489	78
GO:0009074	BP	aromatic amino acid family catabolic process	2.47231e-08	1.08958e-06	3.3994	26
GO:0001934	BP	positive regulation of protein phosphorylation	2.50806e-08	1.09234e-06	2.52699	42
GO:0003333	BP	amino acid transmembrane transport	3.2227e-08	1.38726e-06	2.41855	45
GO:0046395	BP	carboxylic acid catabolic process	4.05758e-08	1.72657e-06	1.91061	77
GO:0023051	BP	regulation of signaling	5.01685e-08	2.1105e-06	1.49004	183
GO:0006865	BP	amino acid transport	6.52393e-08	2.71366e-06	2.1724	54
GO:0009809	BP	lignin biosynthetic process	7.61228e-08	3.13119e-06	2.25859	49
GO:0051347	BP	positive regulation of transferase activity	7.75234e-08	3.15376e-06	2.32524	46
GO:0042327	BP	positive regulation of phosphorylation	7.89301e-08	3.17608e-06	2.43021	42
GO:0009812	BP	flavonoid metabolic process	8.53405e-08	3.3971e-06	1.83691	82
GO:0000302	BP	response to reactive oxygen species	1.20266e-07	4.73642e-06	1.96808	66
GO:0042537	BP	benzene-containing compound metabolic process	1.32478e-07	5.16245e-06	2.47807	39
GO:0050832	BP	defense response to fungus	1.66892e-07	6.43578e-06	1.56586	136
GO:0042447	BP	hormone catabolic process	1.85063e-07	7.0629e-06	3.47846	22
GO:0006721	BP	terpenoid metabolic process	2.22359e-07	8.39971e-06	1.77542	85
GO:0033238	BP	regulation of cellular amine metabolic process	2.29109e-07	8.48163e-06	4.44004	16
GO:0006521	BP	regulation of cellular amino acid metabolic process	2.29109e-07	8.48163e-06	4.44004	16
GO:0019748	BP	secondary metabolic process	2.54554e-07	9.3303e-06	1.52829	146
GO:1903825	BP	organic acid transmembrane transport	2.6428e-07	9.49869e-06	2.19022	48
GO:1905039	BP	carboxylic acid transmembrane transport	2.6428e-07	9.49869e-06	2.19022	48
GO:0009698	BP	phenylpropanoid metabolic process	3.27047e-07	1.16416e-05	1.69099	97
GO:0016053	BP	organic acid biosynthetic process	3.47746e-07	1.21449e-05	1.4035	215
GO:0046394	BP	carboxylic acid biosynthetic process	3.47746e-07	1.21449e-05	1.4035	215
GO:0031667	BP	response to nutrient levels	4.00658e-07	1.3862e-05	1.98579	59
GO:0006950	BP	response to stress	8.7709e-07	3.00647e-05	1.12716	1226
GO:1902223	BP	erythrose 4-phosphate/phosphoenolpyruvate family amino acid biosynthetic process	9.19942e-07	3.09602e-05	5.75284	11
GO:0009094	BP	L-phenylalanine biosynthetic process	9.19942e-07	3.09602e-05	5.75284	11
GO:0090357	BP	regulation of tryptophan metabolic process	1.30019e-06	4.33631e-05	6.18073	10
GO:0098656	BP	anion transmembrane transport	1.41132e-06	4.66493e-05	1.88942	61
GO:0046777	BP	protein autophosphorylation	1.53798e-06	5.03857e-05	1.63786	96
GO:0010562	BP	positive regulation of phosphorus metabolic process	1.76489e-06	5.68142e-05	2.12916	44
GO:0045937	BP	positive regulation of phosphate metabolic process	1.76489e-06	5.68142e-05	2.12916	44
GO:0007568	BP	aging	1.89882e-06	6.05987e-05	1.68016	86
GO:0009690	BP	cytokinin metabolic process	1.96114e-06	6.15265e-05	2.69953	27
GO:0080134	BP	regulation of response to stress	1.95597e-06	6.15265e-05	1.43588	166
GO:0072330	BP	monocarboxylic acid biosynthetic process	2.36762e-06	7.36548e-05	1.49364	135
GO:0006816	BP	calcium ion transport	2.44619e-06	7.5465e-05	2.39958	33
GO:0080167	BP	response to karrikin	3.58945e-06	0.000109819	2.20816	38
GO:0080142	BP	regulation of salicylic acid biosynthetic process	3.7007e-06	0.000112295	3.68749	16
GO:0006720	BP	isoprenoid metabolic process	5.01249e-06	0.000150864	1.62441	89
GO:0019932	BP	second-messenger-mediated signaling	5.32745e-06	0.00015905	2.35202	32
GO:0019722	BP	calcium-mediated signaling	6.05621e-06	0.000179361	2.41378	30
GO:0009072	BP	aromatic amino acid family metabolic process	6.52774e-06	0.000191791	1.96002	48
GO:0009867	BP	jasmonic acid mediated signaling pathway	6.61299e-06	0.000192766	2.17797	37
GO:0032787	BP	monocarboxylic acid metabolic process	7.2848e-06	0.00021069	1.37372	187
GO:0044282	BP	small molecule catabolic process	8.90151e-06	0.000255453	1.60078	89
GO:1901606	BP	alpha-amino acid catabolic process	9.75782e-06	0.000277873	2.03238	42
GO:0010150	BP	leaf senescence	1.05653e-05	0.000298569	1.73985	65
GO:0032107	BP	regulation of response to nutrient levels	1.09091e-05	0.000303651	9.06507	6
GO:0032104	BP	regulation of response to extracellular stimulus	1.09091e-05	0.000303651	9.06507	6
GO:0006793	BP	phosphorus metabolic process	1.43802e-05	0.000397281	1.19899	484
GO:0015802	BP	basic amino acid transport	1.75014e-05	0.000479926	4.85629	10
GO:0031669	BP	cellular response to nutrient levels	1.9443e-05	0.000529249	1.97612	42
GO:0009862	BP	systemic acquired resistance, salicylic acid mediated signaling pathway	1.97469e-05	0.000533597	2.74567	21
GO:0044283	BP	small molecule biosynthetic process	2.12326e-05	0.000569586	1.29036	251
GO:0009095	BP	aromatic amino acid family biosynthetic process, prephenate pathway	2.67162e-05	0.000706453	4.27354	11
GO:0016036	BP	cellular response to phosphate starvation	2.66429e-05	0.000706453	2.6241	22
GO:0009694	BP	jasmonic acid metabolic process	2.93971e-05	0.00077183	2.38877	26
GO:0009695	BP	jasmonic acid biosynthetic process	3.59875e-05	0.000931649	3.00207	17
GO:0042446	BP	hormone biosynthetic process	3.58906e-05	0.000931649	1.5985	77
GO:0009682	BP	induced systemic resistance	3.8533e-05	0.000990619	3.10803	16
GO:2000024	BP	regulation of leaf development	4.01356e-05	0.0010247	2.10667	33
GO:0006493	BP	protein O-linked glycosylation	4.13579e-05	0.00104868	2.6926	20
GO:0018258	BP	protein O-linked glycosylation via hydroxyproline	4.82042e-05	0.00118968	4.38633	10
GO:0010384	BP	cell wall proteoglycan metabolic process	4.82042e-05	0.00118968	4.38633	10
GO:0010405	BP	arabinogalactan protein metabolic process	4.82042e-05	0.00118968	4.38633	10
GO:0010404	BP	cell wall hydroxyproline-rich glycoprotein metabolic process	4.82042e-05	0.00118968	4.38633	10
GO:0002218	BP	activation of innate immune response	5.04108e-05	0.0012359	2.03383	35
GO:0006796	BP	phosphate-containing compound metabolic process	5.31054e-05	0.0012934	1.18625	469
GO:0009063	BP	cellular amino acid catabolic process	5.51341e-05	0.00133403	1.89106	42
GO:0090693	BP	plant organ senescence	5.71467e-05	0.00137375	1.64066	66
GO:0016101	BP	diterpenoid metabolic process	5.79172e-05	0.00138329	1.95723	38
GO:0009685	BP	gibberellin metabolic process	5.91318e-05	0.00140324	2.2957	26
GO:0019740	BP	nitrogen utilization	6.54991e-05	0.00154444	4.24925	10
GO:1900673	BP	olefin metabolic process	6.63365e-05	0.00155429	2.9803	16
GO:0009863	BP	salicylic acid mediated signaling pathway	6.82343e-05	0.0015887	2.16665	29
GO:0062012	BP	regulation of small molecule metabolic process	7.45274e-05	0.00172438	1.75121	51
GO:0072511	BP	divalent inorganic cation transport	8.03629e-05	0.00183644	1.86026	42
GO:0070838	BP	divalent metal ion transport	8.03629e-05	0.00183644	1.86026	42
GO:0016114	BP	terpenoid biosynthetic process	8.16818e-05	0.00185513	1.62771	65
GO:0044255	BP	cellular lipid metabolic process	8.53257e-05	0.00192607	1.25672	261
GO:0006629	BP	lipid metabolic process	0.000101126	0.0022689	1.20648	366
GO:0048583	BP	regulation of response to stimulus	0.00010797	0.00240787	1.235	293
GO:0098754	BP	detoxification	0.000111664	0.00247534	2.10872	29
GO:0006812	BP	cation transport	0.000112754	0.00248461	1.38642	130
GO:0071230	BP	cellular response to amino acid stimulus	0.000113906	0.00249514	2.58355	19
GO:0010565	BP	regulation of cellular ketone metabolic process	0.000124049	0.00270135	1.78394	45
GO:0010365	BP	positive regulation of ethylene biosynthetic process	0.00013752	0.00290915	10.8781	4
GO:1900910	BP	positive regulation of olefin metabolic process	0.00013752	0.00290915	10.8781	4
GO:1900913	BP	positive regulation of olefin biosynthetic process	0.00013752	0.00290915	10.8781	4
GO:0031337	BP	positive regulation of sulfur amino acid metabolic process	0.00013752	0.00290915	10.8781	4
GO:0015858	BP	nucleoside transport	0.00013752	0.00290915	10.8781	4
GO:0043450	BP	alkene biosynthetic process	0.000145224	0.00297028	2.91377	15
GO:0043449	BP	cellular alkene metabolic process	0.000145224	0.00297028	2.91377	15
GO:1900674	BP	olefin biosynthetic process	0.000145224	0.00297028	2.91377	15
GO:0009692	BP	ethylene metabolic process	0.000145224	0.00297028	2.91377	15
GO:0009693	BP	ethylene biosynthetic process	0.000145224	0.00297028	2.91377	15
GO:2000031	BP	regulation of salicylic acid mediated signaling pathway	0.000143636	0.00297028	2.35549	22
GO:0042542	BP	response to hydrogen peroxide	0.000147225	0.00298144	1.99598	32
GO:0045088	BP	regulation of innate immune response	0.000147381	0.00298144	1.67642	54
GO:0046885	BP	regulation of hormone biosynthetic process	0.000149161	0.00300106	2.2996	23
GO:0006029	BP	proteoglycan metabolic process	0.000151992	0.00303284	3.88503	10
GO:0061408	BP	positive regulation of transcription from RNA polymerase II promoter in response to heat stress	0.000152379	0.00303284	2.78925	16
GO:0010104	BP	regulation of ethylene-activated signaling pathway	0.000179463	0.00352518	2.657	17
GO:0070297	BP	regulation of phosphorelay signal transduction system	0.000179463	0.00352518	2.657	17
GO:0045859	BP	regulation of protein kinase activity	0.000179973	0.00352518	1.73195	47
GO:0009628	BP	response to abiotic stimulus	0.000187479	0.00365288	1.15565	539
GO:0016115	BP	terpenoid catabolic process	0.000237422	0.00459799	2.79403	15
GO:0009808	BP	lignin metabolic process	0.000238469	0.00459799	1.67103	51
GO:0036003	BP	positive regulation of transcription from RNA polymerase II promoter in response to stress	0.000241229	0.00462709	2.68595	16
GO:0051560	BP	mitochondrial calcium ion homeostasis	0.00025179	0.00480477	3.67503	10
GO:0015743	BP	malate transport	0.000261338	0.00496141	3.19944	12
GO:0051865	BP	protein autoubiquitination	0.000277371	0.00523891	2.30282	21
GO:0046475	BP	glycerophospholipid catabolic process	0.000282402	0.00530686	5.82755	6
GO:0043200	BP	response to amino acid	0.000283869	0.00530749	2.24923	22
GO:0042594	BP	response to starvation	0.00028618	0.00532381	1.78329	40
GO:0009267	BP	cellular response to starvation	0.000299102	0.00550884	1.87934	34
GO:0044036	BP	cell wall macromolecule metabolic process	0.000297954	0.00550884	1.46812	84
GO:0002253	BP	activation of immune response	0.000303259	0.00555774	1.85905	35
GO:0045089	BP	positive regulation of innate immune response	0.000306185	0.00558372	1.77747	40
GO:0008300	BP	isoprenoid catabolic process	0.000342922	0.00622303	2.44757	18
GO:0034754	BP	cellular hormone metabolic process	0.000360295	0.0065064	1.97165	29
GO:0043549	BP	regulation of kinase activity	0.000373758	0.00671676	1.6774	47
GO:1900160	BP	plastid DNA packaging	0.000397552	0.00672026	13.5976	3
GO:0036385	BP	nucleoid DNA packaging	0.000397552	0.00672026	13.5976	3
GO:0098755	BP	maintenance of seed dormancy by absisic acid	0.000397552	0.00672026	13.5976	3
GO:0090377	BP	seed trichome initiation	0.000397552	0.00672026	13.5976	3
GO:1901893	BP	positive regulation of cell septum assembly	0.000397552	0.00672026	13.5976	3
GO:0010446	BP	response to alkaline pH	0.000397552	0.00672026	13.5976	3
GO:0010973	BP	positive regulation of division septum assembly	0.000397552	0.00672026	13.5976	3
GO:0010055	BP	atrichoblast differentiation	0.000397552	0.00672026	13.5976	3
GO:0031028	BP	septation initiation signaling	0.000397552	0.00672026	13.5976	3
GO:0019418	BP	sulfide oxidation	0.000397552	0.00672026	13.5976	3
GO:0019424	BP	sulfide oxidation, using siroheme sulfite reductase	0.000397552	0.00672026	13.5976	3
GO:0031991	BP	regulation of actomyosin contractile ring contraction	0.000397552	0.00672026	13.5976	3
GO:0010227	BP	floral organ abscission	0.000381241	0.00672026	4.75916	7
GO:0009643	BP	photosynthetic acclimation	0.000401306	0.00672233	3.48657	10
GO:0015893	BP	drug transport	0.000399563	0.00672233	1.70454	44
GO:1900457	BP	regulation of brassinosteroid mediated signaling pathway	0.000431668	0.00719836	2.14209	23
GO:0015714	BP	phosphoenolpyruvate transport	0.000441374	0.00722994	5.43904	6
GO:0035436	BP	triose phosphate transmembrane transport	0.000441374	0.00722994	5.43904	6
GO:1905034	BP	regulation of antifungal innate immune response	0.000441374	0.00722994	5.43904	6
GO:0015717	BP	triose phosphate transport	0.000441374	0.00722994	5.43904	6
GO:0009409	BP	response to cold	0.000456042	0.0074373	1.36689	115
GO:0002252	BP	immune effector process	0.00046729	0.00758731	1.8346	34
GO:1905582	BP	response to mannose	0.000474488	0.00767054	3.70844	9
GO:0071695	BP	anatomical structure maturation	0.000500212	0.00805124	1.77778	37
GO:0080148	BP	negative regulation of response to water deprivation	0.000535659	0.00858446	4.53254	7
GO:0009835	BP	fruit ripening	0.000590041	0.00941523	2.22912	20
GO:0009718	BP	anthocyanin-containing compound biosynthetic process	0.000655611	0.0104166	2.01148	25
GO:0046244	BP	salicylic acid catabolic process	0.000662312	0.0104335	5.0991	6
GO:0010230	BP	alternative respiration	0.000662312	0.0104335	5.0991	6
GO:0048527	BP	lateral root development	0.000685752	0.010757	1.97507	26
GO:0006835	BP	dicarboxylic acid transport	0.000708055	0.01106	2.30903	18
GO:2001038	BP	regulation of cellular response to drug	0.000715834	0.0110879	2.10667	22
GO:2001023	BP	regulation of response to drug	0.000715834	0.0110879	2.10667	22
GO:0008299	BP	isoprenoid biosynthetic process	0.000721078	0.0111226	1.48455	69
GO:0050826	BP	response to freezing	0.000729513	0.011206	2.19316	20
GO:0033559	BP	unsaturated fatty acid metabolic process	0.000766798	0.0117301	2.35877	17
GO:0006633	BP	fatty acid biosynthetic process	0.000786341	0.0119796	1.45829	74
GO:0043620	BP	regulation of DNA-templated transcription in response to stress	0.000807029	0.0122444	2.2272	19
GO:0006022	BP	aminoglycan metabolic process	0.000812933	0.0122836	2.01446	24
GO:0044242	BP	cellular lipid catabolic process	0.000832209	0.0125237	1.65637	43
GO:1901264	BP	carbohydrate derivative transport	0.000841986	0.0126196	2.04409	23
GO:0009765	BP	photosynthesis, light harvesting	0.000863221	0.0128857	2.33494	17
GO:0051338	BP	regulation of transferase activity	0.000906737	0.0134809	1.54838	55
GO:0009743	BP	response to carbohydrate	0.000927111	0.0137287	1.74969	35
GO:0006874	BP	cellular calcium ion homeostasis	0.000991657	0.0145679	2.14136	20
GO:0055074	BP	calcium ion homeostasis	0.000991657	0.0145679	2.14136	20
GO:0009225	BP	nucleotide-sugar metabolic process	0.00104407	0.0152773	2.04896	22
GO:1901605	BP	alpha-amino acid metabolic process	0.00106221	0.0154815	1.36522	100
GO:0015854	BP	guanine transport	0.00109575	0.0156018	5.66567	5
GO:0006691	BP	leukotriene metabolic process	0.00109575	0.0156018	5.66567	5
GO:0015853	BP	adenine transport	0.00109575	0.0156018	5.66567	5
GO:0006065	BP	UDP-glucuronate biosynthetic process	0.00109575	0.0156018	5.66567	5
GO:0046398	BP	UDP-glucuronate metabolic process	0.00109575	0.0156018	5.66567	5
GO:0019370	BP	leukotriene biosynthetic process	0.00109575	0.0156018	5.66567	5
GO:0009403	BP	toxin biosynthetic process	0.00118787	0.0168486	2.50482	14
GO:0006082	BP	organic acid metabolic process	0.00119337	0.0168621	1.17115	344
GO:0001676	BP	long-chain fatty acid metabolic process	0.00124306	0.0174974	2.71952	12
GO:0071289	BP	cellular response to nickel ion	0.00131102	0.0183147	3.96597	7
GO:0010045	BP	response to nickel cation	0.00131102	0.0183147	3.96597	7
GO:0043436	BP	oxoacid metabolic process	0.00135687	0.018884	1.16932	342
GO:0000187	BP	activation of MAPK activity	0.00142738	0.019717	2.82215	11
GO:0043406	BP	positive regulation of MAP kinase activity	0.00142738	0.019717	2.82215	11
GO:0006636	BP	unsaturated fatty acid biosynthetic process	0.0014453	0.0198904	2.67494	12
GO:0110020	BP	regulation of actomyosin structure organization	0.00150254	0.0205255	10.1982	3
GO:0055085	BP	transmembrane transport	0.00149775	0.0205255	1.24495	180
GO:0009226	BP	nucleotide-sugar biosynthetic process	0.00151501	0.0206198	2.16599	18
GO:0006857	BP	oligopeptide transport	0.00155496	0.0210859	2.02518	21
GO:0008610	BP	lipid biosynthetic process	0.00158441	0.0214069	1.22782	201
GO:0001561	BP	fatty acid alpha-oxidation	0.00160685	0.0214749	6.79881	4
GO:1902609	BP	(R)-2-hydroxy-alpha-linolenic acid biosynthetic process	0.00160685	0.0214749	6.79881	4
GO:0006144	BP	purine nucleobase metabolic process	0.00160415	0.0214749	2.956	10
GO:0022611	BP	dormancy process	0.00162349	0.0215418	2.52527	13
GO:0010162	BP	seed dormancy process	0.00162349	0.0215418	2.52527	13
GO:0015748	BP	organophosphate ester transport	0.00162973	0.0215474	1.98111	22
GO:0032467	BP	positive regulation of cytokinesis	0.00167303	0.02182	5.22985	5
GO:0016103	BP	diterpenoid catabolic process	0.00167497	0.02182	2.76988	11
GO:0045487	BP	gibberellin catabolic process	0.00167497	0.02182	2.76988	11
GO:0018105	BP	peptidyl-serine phosphorylation	0.00167526	0.02182	1.81301	28
GO:0042546	BP	cell wall biogenesis	0.00167982	0.02182	1.47328	61
GO:0072503	BP	cellular divalent inorganic cation homeostasis	0.00176396	0.0228328	2.04475	20
GO:0048528	BP	post-embryonic root development	0.00190115	0.0245228	1.75831	30
GO:0072507	BP	divalent inorganic cation homeostasis	0.00193206	0.024835	1.8175	27
GO:0009834	BP	plant-type secondary cell wall biogenesis	0.00205777	0.0263593	1.8576	25
GO:1905623	BP	positive regulation of leaf development	0.00210725	0.0266027	3.05946	9
GO:1900057	BP	positive regulation of leaf senescence	0.00210725	0.0266027	3.05946	9
GO:0050778	BP	positive regulation of immune response	0.00210224	0.0266027	1.60918	40
GO:0009832	BP	plant-type cell wall biogenesis	0.00208675	0.0266027	1.58026	43
GO:0044262	BP	cellular carbohydrate metabolic process	0.00211269	0.0266027	1.28427	131
GO:0006308	BP	DNA catabolic process	0.00225006	0.028141	2.83284	10
GO:0009068	BP	aspartate family amino acid catabolic process	0.00225006	0.028141	2.83284	10
GO:0051273	BP	beta-glucan metabolic process	0.00228356	0.0284638	1.58199	42
GO:0051275	BP	beta-glucan catabolic process	0.00229857	0.0285547	2.14036	17
GO:0047484	BP	regulation of response to osmotic stress	0.00231548	0.028573	1.73587	30
GO:0018209	BP	peptidyl-serine modification	0.00231548	0.028573	1.73587	30
GO:0002237	BP	response to molecule of bacterial origin	0.00240381	0.0295644	2.03429	19
GO:0010438	BP	cellular response to sulfur starvation	0.0024456	0.0298799	4.85629	5
GO:0009852	BP	auxin catabolic process	0.0024456	0.0298799	4.85629	5
GO:0031401	BP	positive regulation of protein modification process	0.00246538	0.0300225	1.5491	45
GO:0042759	BP	long-chain fatty acid biosynthetic process	0.00248268	0.0301341	4.07928	6
GO:0015740	BP	C4-dicarboxylate transport	0.00254392	0.0307765	2.51033	12
GO:0046083	BP	adenine metabolic process	0.00272407	0.03199	6.04338	4
GO:1900367	BP	positive regulation of defense response to insect	0.00272407	0.03199	6.04338	4
GO:0043096	BP	purine nucleobase salvage	0.00272407	0.03199	6.04338	4
GO:0046084	BP	adenine biosynthetic process	0.00272407	0.03199	6.04338	4
GO:1902395	BP	regulation of 1-deoxy-D-xylulose-5-phosphate synthase activity	0.00272407	0.03199	6.04338	4
GO:0052863	BP	1-deoxy-D-xylulose 5-phosphate metabolic process	0.00272407	0.03199	6.04338	4
GO:0052865	BP	1-deoxy-D-xylulose 5-phosphate biosynthetic process	0.00272407	0.03199	6.04338	4
GO:0006168	BP	adenine salvage	0.00272407	0.03199	6.04338	4
GO:0015804	BP	neutral amino acid transport	0.00273065	0.03199	3.19944	8
GO:0050776	BP	regulation of immune response	0.00267876	0.03199	1.48039	54
GO:0015813	BP	L-glutamate transmembrane transport	0.00276821	0.0321252	3.52531	7
GO:0071417	BP	cellular response to organonitrogen compound	0.00275485	0.0321252	1.84374	24
GO:0046283	BP	anthocyanin-containing compound metabolic process	0.00276466	0.0321252	1.81786	25
GO:0098581	BP	detection of external biotic stimulus	0.00286019	0.0327815	2.217	15
GO:0009595	BP	detection of biotic stimulus	0.00286019	0.0327815	2.217	15
GO:0098543	BP	detection of other organism	0.00286019	0.0327815	2.217	15
GO:0016045	BP	detection of bacterium	0.00286019	0.0327815	2.217	15
GO:0031349	BP	positive regulation of defense response	0.00296598	0.033889	1.49135	51
GO:0042723	BP	thiamine-containing compound metabolic process	0.00300819	0.034056	2.91377	9
GO:0006772	BP	thiamine metabolic process	0.00300819	0.034056	2.91377	9
GO:0090333	BP	regulation of stomatal closure	0.00299485	0.034056	1.95649	20
GO:0043410	BP	positive regulation of MAPK cascade	0.00303912	0.0343013	2.57886	11
GO:0019752	BP	carboxylic acid metabolic process	0.00316237	0.0355839	1.16095	313
GO:0009266	BP	response to temperature stimulus	0.00324839	0.036441	1.23546	163
GO:0046148	BP	pigment biosynthetic process	0.00327277	0.0366036	1.50388	48
GO:0043405	BP	regulation of MAP kinase activity	0.00330571	0.0368606	2.43539	12
GO:0046456	BP	icosanoid biosynthetic process	0.00344771	0.038158	4.53254	5
GO:0090378	BP	seed trichome elongation	0.00344771	0.038158	4.53254	5
GO:0015695	BP	organic cation transport	0.00345945	0.038158	3.3994	7
GO:0070588	BP	calcium ion transmembrane transport	0.00346329	0.038158	2.32591	13
GO:1902457	BP	negative regulation of stomatal opening	0.00355007	0.038654	8.15857	3
GO:0072501	BP	cellular divalent inorganic anion homeostasis	0.00355007	0.038654	8.15857	3
GO:0030643	BP	cellular phosphate ion homeostasis	0.00355007	0.038654	8.15857	3
GO:0072502	BP	cellular trivalent inorganic anion homeostasis	0.00355007	0.038654	8.15857	3
GO:0009838	BP	abscission	0.0035943	0.0389068	2.6662	10
GO:0009308	BP	amine metabolic process	0.00358725	0.0389068	1.50374	47
GO:0042762	BP	regulation of sulfur metabolic process	0.00375031	0.0401262	2.39958	12
GO:0016099	BP	monoterpenoid biosynthetic process	0.00375031	0.0401262	2.39958	12
GO:0016098	BP	monoterpenoid metabolic process	0.00375031	0.0401262	2.39958	12
GO:0016998	BP	cell wall macromolecule catabolic process	0.00372771	0.0401262	2.04566	17
GO:0046839	BP	phospholipid dephosphorylation	0.00389154	0.0414153	2.2957	13
GO:0021700	BP	developmental maturation	0.00389317	0.0414153	1.55401	40
GO:0032958	BP	inositol phosphate biosynthetic process	0.00399094	0.0422128	3.02169	8
GO:0046898	BP	response to cycloheximide	0.00399094	0.0422128	3.02169	8
GO:0006690	BP	icosanoid metabolic process	0.00416186	0.0438951	2.61493	10
GO:0006076	BP	(1->3)-beta-D-glucan catabolic process	0.00420857	0.0442617	3.70844	6
GO:0015718	BP	monocarboxylic acid transport	0.00422606	0.0443198	1.86634	21
GO:0065008	BP	regulation of biological quality	0.00423847	0.0443243	1.14298	358
GO:0010337	BP	regulation of salicylic acid metabolic process	0.0042755	0.0444604	1.97385	18
GO:0009733	BP	response to auxin	0.0042701	0.0444604	1.42245	59
GO:0005991	BP	trehalose metabolic process	0.00455756	0.0471514	2.45203	11
GO:0090696	BP	post-embryonic plant organ development	0.00455975	0.0471514	1.65825	30
GO:2001143	BP	N-methylnicotinate transport	0.00471381	0.0483394	4.24925	5
GO:0051180	BP	vitamin transport	0.00471381	0.0483394	4.24925	5
GO:2001142	BP	nicotinate transport	0.00471381	0.0483394	4.24925	5
GO:0015800	BP	acidic amino acid transport	0.00479778	0.0486613	2.56559	10
GO:0034204	BP	lipid translocation	0.00479778	0.0486613	2.56559	10
GO:0043647	BP	inositol phosphate metabolic process	0.00478348	0.0486613	2.33102	12
GO:0009742	BP	brassinosteroid mediated signaling pathway	0.00477869	0.0486613	1.58639	35
GO:1901615	BP	organic hydroxy compound metabolic process	0.00490798	0.049643	1.29202	103
GO:0031224	CC	intrinsic component of membrane	1.48979e-25	8.01509e-23	1.23086	1779
GO:0016021	CC	integral component of membrane	5.05767e-22	1.36051e-19	1.21902	1689
GO:0005886	CC	plasma membrane	3.36433e-19	6.03337e-17	1.26673	1156
GO:0044425	CC	membrane part	2.1657e-16	2.91287e-14	1.16681	1877
GO:0031226	CC	intrinsic component of plasma membrane	8.04036e-09	8.65143e-07	1.60284	151
GO:0016020	CC	membrane	1.17865e-06	0.000105686	1.09361	1833
GO:0031225	CC	anchored component of membrane	3.99006e-06	0.000306664	1.56954	104
GO:0005887	CC	integral component of plasma membrane	2.66173e-05	0.00179001	1.62392	75
GO:0046658	CC	anchored component of plasma membrane	5.04688e-05	0.00301691	1.58743	76
GO:0044459	CC	plasma membrane part	0.000106206	0.0057139	1.2793	221
GO:0003700	MF	DNA-binding transcription factor activity	8.17895e-30	1.29882e-26	1.64529	514
GO:0140110	MF	transcription regulator activity	1.9933e-25	1.58268e-22	1.56271	529
GO:0004674	MF	protein serine/threonine kinase activity	1.77598e-23	7.05062e-21	1.47418	621
GO:0003824	MF	catalytic activity	1.39628e-23	7.05062e-21	1.12994	3094
GO:0016740	MF	transferase activity	4.63416e-22	1.47181e-19	1.24066	1499
GO:0004672	MF	protein kinase activity	1.37081e-20	3.62808e-18	1.4227	642
GO:0043565	MF	sequence-specific DNA binding	1.85536e-20	3.79543e-18	1.64254	352
GO:0016773	MF	phosphotransferase activity, alcohol group as acceptor	1.91206e-20	3.79543e-18	1.4029	683
GO:0016301	MF	kinase activity	2.88015e-20	5.08186e-18	1.39174	705
GO:0004364	MF	glutathione transferase activity	4.21146e-19	6.68781e-17	3.06536	78
GO:0016757	MF	transferase activity, transferring glycosyl groups	6.47595e-19	9.34891e-17	1.66969	306
GO:0016758	MF	transferase activity, transferring hexosyl groups	1.18965e-17	1.57431e-15	1.72241	256
GO:0016772	MF	transferase activity, transferring phosphorus-containing groups	3.27887e-15	4.00526e-13	1.31584	725
GO:0008194	MF	UDP-glycosyltransferase activity	3.80368e-15	4.31446e-13	1.83864	177
GO:0004709	MF	MAP kinase kinase kinase activity	6.51932e-13	6.90179e-11	4.30815	32
GO:0005509	MF	calcium ion binding	1.6513e-12	1.63891e-10	1.72309	175
GO:0035251	MF	UDP-glucosyltransferase activity	3.20523e-12	2.99406e-10	1.90367	126
GO:0045548	MF	phenylalanine ammonia-lyase activity	8.61907e-12	7.60393e-10	5.30076	23
GO:0046527	MF	glucosyltransferase activity	1.31986e-11	1.10312e-09	1.79115	142
GO:0016491	MF	oxidoreductase activity	8.82631e-11	7.00809e-09	1.25264	711
GO:0022857	MF	transmembrane transporter activity	1.27349e-10	9.62999e-09	1.33582	452
GO:0016841	MF	ammonia-lyase activity	1.45099e-10	1.04735e-08	4.53254	24
GO:0004497	MF	monooxygenase activity	3.68412e-10	2.54365e-08	1.52562	218
GO:0005215	MF	transporter activity	4.40095e-10	2.91196e-08	1.31029	482
GO:0051213	MF	dioxygenase activity	9.10544e-10	5.78378e-08	1.86492	103
GO:0015291	MF	secondary active transmembrane transporter activity	1.84817e-09	1.1288e-07	1.57446	176
GO:0005342	MF	organic acid transmembrane transporter activity	2.71521e-09	1.53991e-07	2.07662	73
GO:0046943	MF	carboxylic acid transmembrane transporter activity	2.71521e-09	1.53991e-07	2.07662	73
GO:0016765	MF	transferase activity, transferring alkyl or aryl (other than methyl) groups	3.65565e-09	2.00178e-07	1.91183	89
GO:0015075	MF	ion transmembrane transporter activity	4.39992e-09	2.32902e-07	1.40359	285
GO:0016705	MF	oxidoreductase activity, acting on paired donors, with incorporation or reduction of molecular oxygen	5.42763e-09	2.78035e-07	1.46495	227
GO:0004553	MF	hydrolase activity, hydrolyzing O-glycosyl compounds	6.39064e-09	3.17136e-07	1.54578	177
GO:0005516	MF	calmodulin binding	7.69802e-09	3.70438e-07	1.6815	127
GO:0008514	MF	organic anion transmembrane transporter activity	1.02876e-08	4.66764e-07	1.91003	84
GO:0015293	MF	symporter activity	1.00318e-08	4.66764e-07	1.75663	108
GO:0045486	MF	naringenin 3-dioxygenase activity	1.06206e-08	4.68485e-07	6.14086	14
GO:0050738	MF	fructosyltransferase activity	1.24427e-08	5.19321e-07	5.30639	16
GO:0050306	MF	sucrose 1F-fructosyltransferase activity	1.24427e-08	5.19321e-07	5.30639	16
GO:0008509	MF	anion transmembrane transporter activity	1.27541e-08	5.19321e-07	1.707	117
GO:0015318	MF	inorganic molecular entity transmembrane transporter activity	1.55309e-08	6.16579e-07	1.38842	281
GO:0030246	MF	carbohydrate binding	1.81145e-08	7.01604e-07	1.41868	248
GO:0016840	MF	carbon-nitrogen lyase activity	2.51443e-08	9.50694e-07	3.30753	27
GO:0004664	MF	prephenate dehydratase activity	3.0297e-08	1.09345e-06	7.47869	11
GO:0047769	MF	arogenate dehydratase activity	3.0297e-08	1.09345e-06	7.47869	11
GO:0005506	MF	iron ion binding	3.38121e-08	1.19319e-06	1.45224	212
GO:0015085	MF	calcium ion transmembrane transporter activity	6.04827e-08	2.08797e-06	2.54955	39
GO:0022804	MF	active transmembrane transporter activity	7.4386e-08	2.5133e-06	1.40009	243
GO:0004888	MF	transmembrane signaling receptor activity	8.51309e-08	2.81641e-06	1.59338	133
GO:0042973	MF	glucan endo-1,3-beta-D-glucosidase activity	1.53495e-07	4.97449e-06	2.40303	41
GO:0015171	MF	amino acid transmembrane transporter activity	1.95597e-07	6.09596e-06	2.19172	49
GO:0038023	MF	signaling receptor activity	1.95777e-07	6.09596e-06	1.52554	150
GO:0015926	MF	glucosidase activity	2.13271e-07	6.51298e-06	1.86935	73
GO:0045551	MF	cinnamyl-alcohol dehydrogenase activity	2.29109e-07	6.73751e-06	4.44004	16
GO:0052747	MF	sinapyl alcohol dehydrogenase activity	2.29109e-07	6.73751e-06	4.44004	16
GO:0016798	MF	hydrolase activity, acting on glycosyl bonds	2.75477e-07	7.95376e-06	1.44989	185
GO:0080044	MF	quercetin 7-O-glucosyltransferase activity	3.95263e-07	1.12085e-05	2.18119	47
GO:0080043	MF	quercetin 3-O-glucosyltransferase activity	4.37191e-07	1.218e-05	2.17377	47
GO:0015295	MF	solute:proton symporter activity	1.00694e-06	2.75694e-05	1.78725	74
GO:0015294	MF	solute:cation symporter activity	1.39231e-06	3.74744e-05	1.7644	75
GO:0033897	MF	ribonuclease T2 activity	3.4384e-06	9.10029e-05	5.66567	10
GO:0043167	MF	ion binding	4.07043e-06	0.000105965	1.07352	2284
GO:0018685	MF	alkane 1-monooxygenase activity	5.35151e-06	0.000137068	5.43904	10
GO:0016701	MF	oxidoreductase activity, acting on single donors with incorporation of molecular oxygen	6.94959e-06	0.000175174	2.28939	33
GO:0004602	MF	glutathione peroxidase activity	8.12125e-06	0.000201508	5.22985	10
GO:0031406	MF	carboxylic acid binding	9.4763e-06	0.000228006	1.94844	47
GO:0043177	MF	organic acid binding	9.4763e-06	0.000228006	1.94844	47
GO:0140096	MF	catalytic activity, acting on a protein	1.04232e-05	0.000247045	1.13043	977
GO:0005262	MF	calcium channel activity	1.1151e-05	0.000260408	2.6318	24
GO:0008422	MF	beta-glucosidase activity	1.46115e-05	0.000336277	1.79413	57
GO:0004564	MF	beta-fructofuranosidase activity	1.723e-05	0.000390874	2.62811	23
GO:0004575	MF	sucrose alpha-glucosidase activity	1.76119e-05	0.00039391	3.29639	16
GO:0042972	MF	licheninase activity	2.50328e-05	0.000552112	6.79881	7
GO:0005230	MF	extracellular ligand-gated ion channel activity	3.05895e-05	0.000622771	2.74699	20
GO:0008066	MF	glutamate receptor activity	3.05895e-05	0.000622771	2.74699	20
GO:0022835	MF	transmitter-gated channel activity	3.05895e-05	0.000622771	2.74699	20
GO:0004970	MF	ionotropic glutamate receptor activity	3.05895e-05	0.000622771	2.74699	20
GO:0030594	MF	neurotransmitter receptor activity	3.05895e-05	0.000622771	2.74699	20
GO:0022824	MF	transmitter-gated ion channel activity	3.05895e-05	0.000622771	2.74699	20
GO:0005261	MF	cation channel activity	3.41622e-05	0.000686704	2.04818	36
GO:0016892	MF	endoribonuclease activity, producing 3'-phosphomonoesters	3.49577e-05	0.00069391	4.53254	10
GO:0060089	MF	molecular transducer activity	3.76009e-05	0.000737164	1.36651	162
GO:0019199	MF	transmembrane receptor protein kinase activity	4.27956e-05	0.000828773	1.47953	105
GO:0009931	MF	calcium-dependent protein serine/threonine kinase activity	4.44941e-05	0.000840799	2.4821	23
GO:0010857	MF	calcium-dependent protein kinase activity	4.44941e-05	0.000840799	2.4821	23
GO:0031418	MF	L-ascorbic acid binding	4.5005e-05	0.000840799	2.3772	25
GO:1990714	MF	hydroxyproline O-galactosyltransferase activity	4.82042e-05	0.000879866	4.38633	10
GO:0016984	MF	ribulose-bisphosphate carboxylase activity	4.77208e-05	0.000879866	4.04253	11
GO:0008324	MF	cation transmembrane transporter activity	5.2996e-05	0.000956336	1.32237	191
GO:0043169	MF	cation binding	5.76011e-05	0.00102776	1.09965	1248
GO:0120091	MF	jasmonic acid hydrolase	6.54991e-05	0.00115569	4.24925	10
GO:0022834	MF	ligand-gated channel activity	7.14673e-05	0.00123359	2.52699	21
GO:0015276	MF	ligand-gated ion channel activity	7.14673e-05	0.00123359	2.52699	21
GO:0050502	MF	cis-zeatin O-beta-D-glucosyltransferase activity	7.47641e-05	0.00126851	3.22655	14
GO:0016702	MF	oxidoreductase activity, acting on single donors with incorporation of molecular oxygen, incorporation of two atoms of oxygen	7.50882e-05	0.00126851	2.22506	27
GO:0005402	MF	carbohydrate:cation symporter activity	9.06435e-05	0.00148394	2.10272	30
GO:0005351	MF	carbohydrate:proton symporter activity	9.06435e-05	0.00148394	2.10272	30
GO:0046872	MF	metal ion binding	8.95499e-05	0.00148394	1.09717	1238
GO:0015120	MF	phosphoglycerate transmembrane transporter activity	9.88405e-05	0.00158544	6.79881	6
GO:0047987	MF	hydroperoxide dehydratase activity	9.88405e-05	0.00158544	6.79881	6
GO:0016706	MF	oxidoreductase activity, acting on paired donors, with incorporation or reduction of molecular oxygen, 2-oxoglutarate as one donor, and incorporation of one atom each of oxygen into both donors	0.000122391	0.00192433	1.92722	36
GO:0004675	MF	transmembrane receptor protein serine/threonine kinase activity	0.000121914	0.00192433	1.46959	95
GO:0016645	MF	oxidoreductase activity, acting on the CH-NH group of donors	0.000136878	0.002131	2.26627	24
GO:0004683	MF	calmodulin-dependent protein kinase activity	0.000166919	0.00257348	2.28281	23
GO:0048037	MF	cofactor binding	0.000177608	0.00271193	1.16985	470
GO:0000978	MF	RNA polymerase II proximal promoter sequence-specific DNA binding	0.000203324	0.00307503	2.30113	22
GO:0004464	MF	leukotriene-C4 synthase activity	0.000210318	0.00312135	7.55423	5
GO:0004103	MF	choline kinase activity	0.000210318	0.00312135	7.55423	5
GO:0000014	MF	single-stranded DNA endodeoxyribonuclease activity	0.00025179	0.00370224	3.67503	10
GO:0048029	MF	monosaccharide binding	0.000303259	0.00441812	1.85905	35
GO:0004805	MF	trehalose-phosphatase activity	0.000319319	0.0046098	3.57832	10
GO:0050213	MF	progesterone 5-alpha-reductase activity	0.000397552	0.00521746	13.5976	3
GO:0009978	MF	allene oxide synthase activity	0.000397552	0.00521746	13.5976	3
GO:0050311	MF	sulfite reductase (ferredoxin) activity	0.000397552	0.00521746	13.5976	3
GO:0016002	MF	sulfite reductase activity	0.000397552	0.00521746	13.5976	3
GO:0045140	MF	inositol phosphoceramide synthase activity	0.000388368	0.00521746	9.06507	4
GO:0047493	MF	ceramide cholinephosphotransferase activity	0.000388368	0.00521746	9.06507	4
GO:0004781	MF	sulfate adenylyltransferase (ATP) activity	0.000388368	0.00521746	9.06507	4
GO:0033188	MF	sphingomyelin synthase activity	0.000388368	0.00521746	9.06507	4
GO:0005319	MF	lipid transporter activity	0.000374899	0.00521746	1.8567	34
GO:0015144	MF	carbohydrate transmembrane transporter activity	0.00039454	0.00521746	1.74219	41
GO:0035673	MF	oligopeptide transmembrane transporter activity	0.000382697	0.00521746	1.7197	43
GO:0000987	MF	proximal promoter sequence-specific DNA binding	0.000425891	0.00554357	1.95213	29
GO:0042879	MF	aldonate transmembrane transporter activity	0.000441374	0.00560722	5.43904	6
GO:0071917	MF	triose-phosphate transmembrane transporter activity	0.000441374	0.00560722	5.43904	6
GO:0033949	MF	fructan beta-(2,6)-fructosidase activity	0.000441374	0.00560722	5.43904	6
GO:0016629	MF	12-oxophytodienoate reductase activity	0.000500061	0.00630236	3.3994	10
GO:0046873	MF	metal ion transmembrane transporter activity	0.000524303	0.00655585	1.45953	79
GO:0022838	MF	substrate-specific channel activity	0.000533746	0.00662179	1.57653	56
GO:0046906	MF	tetrapyrrole binding	0.000609138	0.00749853	1.22354	247
GO:0004708	MF	MAP kinase kinase activity	0.000618128	0.00755067	3.31649	10
GO:0080030	MF	methyl indole-3-acetate esterase activity	0.000690077	0.00836521	1.89582	29
GO:0042578	MF	phosphoric ester hydrolase activity	0.000856107	0.0102992	1.32582	125
GO:0016165	MF	linoleate 13S-lipoxygenase activity	0.000897653	0.0107178	3.75107	8
GO:0044212	MF	transcription regulatory region DNA binding	0.000952943	0.0112094	1.31427	130
GO:0001067	MF	regulatory region nucleic acid binding	0.000952943	0.0112094	1.31427	130
GO:0016803	MF	ether hydrolase activity	0.00102159	0.0117557	2.93282	11
GO:0004301	MF	epoxide hydrolase activity	0.00102159	0.0117557	2.93282	11
GO:0016903	MF	oxidoreductase activity, acting on the aldehyde or oxo group of donors	0.00101066	0.0117557	1.63023	44
GO:0005216	MF	ion channel activity	0.00105279	0.0120275	1.60794	46
GO:0003979	MF	UDP-glucose 6-dehydrogenase activity	0.00109575	0.0124289	5.66567	5
GO:0015333	MF	peptide:proton symporter activity	0.00112878	0.0127128	1.68859	38
GO:0008028	MF	monocarboxylic acid transmembrane transporter activity	0.00118004	0.0131043	2.0692	21
GO:0015238	MF	drug transmembrane transporter activity	0.00117941	0.0131043	1.55838	51
GO:0005548	MF	phospholipid transporter activity	0.00129532	0.0142845	2.05432	21
GO:0016813	MF	hydrolase activity, acting on carbon-nitrogen (but not peptide) bonds, in linear amidines	0.00135088	0.0146931	4.53254	6
GO:0016207	MF	4-coumarate-CoA ligase activity	0.00135088	0.0146931	4.53254	6
GO:0016791	MF	phosphatase activity	0.00143038	0.0154519	1.33406	109
GO:0047130	MF	saccharopine dehydrogenase (NADP+, L-lysine-forming) activity	0.00150254	0.0159069	10.1982	3
GO:0004753	MF	saccharopine dehydrogenase activity	0.00150254	0.0159069	10.1982	3
GO:0047131	MF	saccharopine dehydrogenase (NAD+, L-glutamate-forming) activity	0.00150254	0.0159069	10.1982	3
GO:0022890	MF	inorganic cation transmembrane transporter activity	0.00154949	0.0162953	1.2561	166
GO:0005337	MF	nucleoside transmembrane transporter activity	0.00160685	0.0165693	6.79881	4
GO:0004350	MF	glutamate-5-semialdehyde dehydrogenase activity	0.00160685	0.0165693	6.79881	4
GO:0004349	MF	glutamate 5-kinase activity	0.00160685	0.0165693	6.79881	4
GO:0020037	MF	heme binding	0.0017008	0.0174249	1.20962	228
GO:0102721	MF	ubiquinol:oxygen oxidoreductase activity	0.00185225	0.018708	4.29398	6
GO:0009916	MF	alternative oxidase activity	0.00185225	0.018708	4.29398	6
GO:0090599	MF	alpha-glucosidase activity	0.00186561	0.018708	2.24291	16
GO:0022803	MF	passive transmembrane transporter activity	0.00188494	0.018708	1.4611	62
GO:0015267	MF	channel activity	0.00188494	0.018708	1.4611	62
GO:0004427	MF	inorganic diphosphatase activity	0.00195652	0.0192979	2.71952	11
GO:0019203	MF	carbohydrate phosphatase activity	0.00197815	0.0193908	2.37958	14
GO:0047066	MF	phospholipid-hydroperoxide glutathione peroxidase activity	0.0024456	0.0238259	4.85629	5
GO:0004097	MF	catechol oxidase activity	0.00248268	0.0240396	4.07928	6
GO:0019139	MF	cytokinin dehydrogenase activity	0.00252606	0.0243115	2.98484	9
GO:0030295	MF	protein kinase activator activity	0.0026434	0.0251361	2.77502	10
GO:0019209	MF	kinase activator activity	0.0026434	0.0251361	2.77502	10
GO:0003999	MF	adenine phosphoribosyltransferase activity	0.00272407	0.025446	6.04338	4
GO:0008661	MF	1-deoxy-D-xylulose-5-phosphate synthase activity	0.00272407	0.025446	6.04338	4
GO:0004779	MF	sulfate adenylyltransferase activity	0.00272407	0.025446	6.04338	4
GO:0008526	MF	phosphatidylinositol transporter activity	0.00308985	0.0285272	2.71952	10
GO:0008378	MF	galactosyltransferase activity	0.00308152	0.0285272	1.91644	21
GO:0022839	MF	ion gated channel activity	0.00327741	0.030084	1.58987	38
GO:0004793	MF	threonine aldolase activity	0.00344771	0.030863	4.53254	5
GO:0008732	MF	L-allo-threonine aldolase activity	0.00344771	0.030863	4.53254	5
GO:0034007	MF	S-linalool synthase activity	0.00345945	0.030863	3.3994	7
GO:0015101	MF	organic cation transmembrane transporter activity	0.00345945	0.030863	3.3994	7
GO:0003993	MF	acid phosphatase activity	0.0034316	0.030863	1.81301	24
GO:0080123	MF	jasmonate-amino synthetase activity	0.00355007	0.0311465	8.15857	3
GO:0047751	MF	cholestenone 5-alpha-reductase activity	0.00355007	0.0311465	8.15857	3
GO:0016673	MF	oxidoreductase activity, acting on a sulfur group of donors, iron-sulfur protein as acceptor	0.00355007	0.0311465	8.15857	3
GO:0016616	MF	oxidoreductase activity, acting on the CH-OH group of donors, NAD or NADP as acceptor	0.00392611	0.0342564	1.353	80
GO:0005313	MF	L-glutamate transmembrane transporter activity	0.00399633	0.0344901	2.4929	11
GO:0016801	MF	hydrolase activity, acting on ether bonds	0.00399633	0.0344901	2.4929	11
GO:0003677	MF	DNA binding	0.00409825	0.0351785	1.09727	691
GO:0022836	MF	gated channel activity	0.00429244	0.0366473	1.54518	40
GO:0090417	MF	N-methylnicotinate transmembrane transporter activity	0.00471381	0.039606	4.24925	5
GO:0090416	MF	nicotinate transmembrane transporter activity	0.00471381	0.039606	4.24925	5
GO:0015651	MF	quaternary ammonium group transmembrane transporter activity	0.00471381	0.039606	4.24925	5
GO:0018742	MF	epoxide hydrolase B activity	0.00476884	0.0398575	2.94002	8
GO:0005310	MF	dicarboxylic acid transmembrane transporter activity	0.005274	0.0438488	2.08127	15
GO:0015114	MF	phosphate ion transmembrane transporter activity	0.00534413	0.0442004	3.5472	6
GO:0010487	MF	thermospermine synthase activity	0.00540757	0.044264	13.5976	2
GO:0018580	MF	nitronate monooxygenase activity	0.00540757	0.044264	13.5976	2
GO:0000832	MF	inositol hexakisphosphate 5-kinase activity	0.00671177	0.0491166	6.79881	3
GO:0000829	MF	inositol heptakisphosphate kinase activity	0.00671177	0.0491166	6.79881	3
GO:0000828	MF	inositol hexakisphosphate kinase activity	0.00671177	0.0491166	6.79881	3
GO:0102092	MF	5-diphosphoinositol pentakisphosphate 3-kinase activity	0.00671177	0.0491166	6.79881	3
GO:0015152	MF	glucose-6-phosphate transmembrane transporter activity	0.00671177	0.0491166	6.79881	3
GO:0003991	MF	acetylglutamate kinase activity	0.00671177	0.0491166	6.79881	3
GO:0052723	MF	inositol hexakisphosphate 1-kinase activity	0.00671177	0.0491166	6.79881	3
GO:0004758	MF	serine C-palmitoyltransferase activity	0.00671177	0.0491166	6.79881	3
GO:0047840	MF	dCTP diphosphatase activity	0.00671177	0.0491166	6.79881	3
GO:0032791	MF	lead ion binding	0.00671177	0.0491166	6.79881	3
GO:0033857	MF	diphosphoinositol-pentakisphosphate kinase activity	0.00671177	0.0491166	6.79881	3
GO:0052861	MF	glucan endo-1,3-beta-glucanase activity, C-3 substituted reducing group	0.00671177	0.0491166	6.79881	3
GO:0052862	MF	glucan endo-1,4-beta-glucanase activity, C-3 substituted reducing group	0.00671177	0.0491166	6.79881	3
GO:0034618	MF	arginine binding	0.00671177	0.0491166	6.79881	3
GO:0042282	MF	hydroxymethylglutaryl-CoA reductase activity	0.00671177	0.0491166	6.79881	3
GO:0052724	MF	inositol hexakisphosphate 3-kinase activity	0.00671177	0.0491166	6.79881	3
GO:0016454	MF	C-palmitoyltransferase activity	0.00671177	0.0491166	6.79881	3
GO:0047952	MF	glycerol-3-phosphate dehydrogenase [NAD(P)+] activity	0.00633179	0.0491166	4.94459	4
GO:0008460	MF	dTDP-glucose 4,6-dehydratase activity	0.00633179	0.0491166	4.94459	4
GO:0090482	MF	vitamin transmembrane transporter activity	0.00632965	0.0491166	3.07043	7
GO:0008519	MF	ammonium transmembrane transporter activity	0.00660002	0.0491166	2.6038	9
GO:0034485	MF	phosphatidylinositol-3,4,5-trisphosphate 5-phosphatase activity	0.00660002	0.0491166	2.6038	9
GO:0016620	MF	oxidoreductase activity, acting on the aldehyde or oxo group of donors, NAD or NADP as acceptor	0.0061883	0.0491166	1.60888	31

## Sheet: N0_1Y vs. N0_1W
Accession	Term_Type	Term_name	p-value	FDR	Rich_Ratio	Number
GO:0010200	BP	response to chitin	1.40015e-19	3.85882e-16	3.6361	67
GO:0042493	BP	response to drug	3.3078e-19	4.55815e-16	2.30863	136
GO:1901700	BP	response to oxygen-containing compound	1.33269e-16	1.2243e-13	1.64134	284
GO:0006749	BP	glutathione metabolic process	1.59737e-15	1.10059e-12	4.17105	44
GO:0010033	BP	response to organic substance	6.31527e-15	3.48097e-12	1.64373	253
GO:0009611	BP	response to wounding	4.25771e-14	1.95571e-11	2.831	67
GO:0042221	BP	response to chemical	9.47159e-14	3.7291e-11	1.46828	358
GO:2000022	BP	regulation of jasmonic acid mediated signaling pathway	5.35628e-13	1.70433e-10	4.9487	30
GO:0010243	BP	response to organonitrogen compound	5.56566e-13	1.70433e-10	2.38522	83
GO:0006790	BP	sulfur compound metabolic process	6.2528e-12	1.72327e-09	2.30281	81
GO:1901698	BP	response to nitrogen compound	8.36127e-12	2.09488e-09	2.14822	93
GO:0006575	BP	cellular modified amino acid metabolic process	1.35829e-11	3.11953e-09	2.96119	50
GO:0033993	BP	response to lipid	1.93429e-11	4.10068e-09	1.97401	110
GO:0090357	BP	regulation of tryptophan metabolic process	3.70782e-11	7.29911e-09	14.5987	11
GO:0009737	BP	response to abscisic acid	8.75079e-11	1.60781e-08	2.07413	91
GO:0097305	BP	response to alcohol	9.8199e-11	1.69148e-08	2.05087	93
GO:0009755	BP	hormone-mediated signaling pathway	1.55199e-09	2.51605e-07	1.60362	169
GO:0009873	BP	ethylene-activated signaling pathway	2.61666e-09	3.79554e-07	2.35528	58
GO:0009719	BP	response to endogenous stimulus	2.59969e-09	3.79554e-07	1.56154	182
GO:0006521	BP	regulation of cellular amino acid metabolic process	7.17369e-09	8.23779e-07	7.74624	13
GO:0033238	BP	regulation of cellular amine metabolic process	7.17369e-09	8.23779e-07	7.74624	13
GO:0046942	BP	carboxylic acid transport	6.74879e-09	8.23779e-07	2.55545	47
GO:0015849	BP	organic acid transport	6.74879e-09	8.23779e-07	2.55545	47
GO:0009725	BP	response to hormone	6.03157e-09	8.23779e-07	1.56334	173
GO:0001101	BP	response to acid chemical	8.66625e-09	9.55368e-07	1.49979	201
GO:0048528	BP	post-embryonic root development	9.6323e-09	1.02102e-06	3.52382	28
GO:0009753	BP	response to jasmonic acid	2.5175e-08	2.56971e-06	2.84852	36
GO:0090696	BP	post-embryonic plant organ development	3.46189e-08	3.40749e-06	3.32328	28
GO:0005975	BP	carbohydrate metabolic process	3.64791e-08	3.46677e-06	1.48791	191
GO:0050896	BP	response to stimulus	3.83195e-08	3.52028e-06	1.18152	777
GO:0006308	BP	DNA catabolic process	5.62162e-08	4.99781e-06	7.29934	12
GO:0048527	BP	lateral root development	6.10938e-08	5.2617e-06	3.75162	23
GO:0007568	BP	aging	1.93312e-07	1.61445e-05	2.18141	52
GO:0090693	BP	plant organ senescence	2.221e-07	1.80031e-05	2.3486	44
GO:0015711	BP	organic anion transport	3.17668e-07	2.50141e-05	2.12856	53
GO:1900140	BP	regulation of seedling development	3.8421e-07	2.94134e-05	3.28984	24
GO:0010029	BP	regulation of seed germination	5.02606e-07	3.74374e-05	3.45345	22
GO:0010646	BP	regulation of cell communication	5.23189e-07	3.7945e-05	1.68512	98
GO:0009966	BP	regulation of signal transduction	5.82587e-07	4.11695e-05	1.69648	95
GO:0051707	BP	response to other organism	6.69417e-07	4.61228e-05	1.40962	202
GO:0010150	BP	leaf senescence	1.31015e-06	8.80678e-05	2.299	40
GO:0009809	BP	lignin biosynthetic process	1.46695e-06	9.18846e-05	2.77127	28
GO:0014070	BP	response to organic cyclic compound	1.45801e-06	9.18846e-05	1.80017	73
GO:0023051	BP	regulation of signaling	1.43169e-06	9.18846e-05	1.66093	95
GO:0006950	BP	response to stress	1.693e-06	0.000103687	1.18645	601
GO:0000160	BP	phosphorelay signal transduction system	2.04021e-06	0.000117926	1.88566	62
GO:0043207	BP	response to external biotic stimulus	2.05386e-06	0.000117926	1.38578	202
GO:0007165	BP	signal transduction	2.01144e-06	0.000117926	1.35636	228
GO:0046677	BP	response to antibiotic	2.17026e-06	0.000122066	1.79637	71
GO:0071497	BP	cellular response to freezing	2.41111e-06	0.000130294	18.2483	5
GO:0042425	BP	choline biosynthetic process	2.41111e-06	0.000130294	18.2483	5
GO:0006820	BP	anion transport	2.69679e-06	0.00014293	1.77702	72
GO:0009733	BP	response to auxin	2.98755e-06	0.000155353	2.17427	42
GO:0009751	BP	response to salicylic acid	3.58632e-06	0.000183035	1.92133	56
GO:0031408	BP	oxylipin biosynthetic process	4.73949e-06	0.000237491	3.48048	18
GO:0009607	BP	response to biotic stimulus	4.9926e-06	0.000245707	1.36062	207
GO:0019748	BP	secondary metabolic process	5.92193e-06	0.000286331	1.70824	76
GO:1905034	BP	regulation of antifungal innate immune response	6.15169e-06	0.000292311	11.6789	6
GO:0031407	BP	oxylipin metabolic process	6.26218e-06	0.000292518	3.41268	18
GO:0048583	BP	regulation of response to stimulus	7.90905e-06	0.000363289	1.42095	157
GO:0006721	BP	terpenoid metabolic process	9.25391e-06	0.000418095	2.01825	45
GO:0009636	BP	response to toxic substance	1.05828e-05	0.000470425	2.15437	38
GO:0006720	BP	isoprenoid metabolic process	1.42542e-05	0.000623564	1.92036	49
GO:0006865	BP	amino acid transport	1.9193e-05	0.000826498	2.41872	28
GO:0016054	BP	organic acid catabolic process	2.08908e-05	0.000885772	2.0666	39
GO:0009410	BP	response to xenobiotic stimulus	2.16501e-05	0.000890563	5.12234	10
GO:0009808	BP	lignin metabolic process	2.15688e-05	0.000890563	2.25136	32
GO:0003333	BP	amino acid transmembrane transport	2.43159e-05	0.000985511	2.65431	23
GO:0009309	BP	amine biosynthetic process	2.65088e-05	0.00104369	3.07341	18
GO:0042401	BP	cellular biogenic amine biosynthetic process	2.65088e-05	0.00104369	3.07341	18
GO:0010731	BP	protein glutathionylation	2.96331e-05	0.0010785	9.22022	6
GO:0030417	BP	nicotianamine metabolic process	2.9741e-05	0.0010785	6.31294	8
GO:0030418	BP	nicotianamine biosynthetic process	2.9741e-05	0.0010785	6.31294	8
GO:0072351	BP	tricarboxylic acid biosynthetic process	2.9741e-05	0.0010785	6.31294	8
GO:0090502	BP	RNA phosphodiester bond hydrolysis, endonucleolytic	2.92051e-05	0.0010785	4.17105	12
GO:1900150	BP	regulation of defense response to fungus	2.80259e-05	0.0010785	2.69892	22
GO:0009620	BP	response to fungus	3.1683e-05	0.001134	1.61403	78
GO:0009308	BP	amine metabolic process	3.42566e-05	0.0012104	2.19839	32
GO:0044106	BP	cellular amine metabolic process	3.57988e-05	0.00123327	2.52974	24
GO:0006576	BP	cellular biogenic amine metabolic process	3.57988e-05	0.00123327	2.52974	24
GO:0006970	BP	response to osmotic stress	3.64272e-05	0.00123942	1.46302	116
GO:0042447	BP	hormone catabolic process	3.71091e-05	0.00124723	4.07405	12
GO:0010454	BP	negative regulation of cell fate commitment	4.0131e-05	0.00125683	29.1974	3
GO:1900033	BP	negative regulation of trichome patterning	4.0131e-05	0.00125683	29.1974	3
GO:1900032	BP	regulation of trichome patterning	4.0131e-05	0.00125683	29.1974	3
GO:0098755	BP	maintenance of seed dormancy by absisic acid	4.0131e-05	0.00125683	29.1974	3
GO:1905614	BP	negative regulation of developmental vegetative growth	4.0131e-05	0.00125683	29.1974	3
GO:0035556	BP	intracellular signal transduction	3.90798e-05	0.00125683	1.50891	100
GO:0046395	BP	carboxylic acid catabolic process	4.10659e-05	0.00127166	2.02463	38
GO:0044550	BP	secondary metabolite biosynthetic process	4.45049e-05	0.00136284	1.77752	54
GO:0006814	BP	sodium ion transport	4.68037e-05	0.00141748	3.98146	12
GO:0009699	BP	phenylpropanoid biosynthetic process	5.07215e-05	0.00151944	1.94649	41
GO:0009628	BP	response to abiotic stimulus	5.56884e-05	0.00165029	1.25684	273
GO:0010565	BP	regulation of cellular ketone metabolic process	6.43089e-05	0.00186564	2.29833	27
GO:0031347	BP	regulation of defense response	6.38657e-05	0.00186564	1.69752	60
GO:0010928	BP	regulation of auxin mediated signaling pathway	6.98016e-05	0.00200389	2.85626	18
GO:0006835	BP	dicarboxylic acid transport	7.10229e-05	0.00201793	3.58081	13
GO:0009738	BP	abscisic acid-activated signaling pathway	7.55555e-05	0.0021248	1.78468	50
GO:0001505	BP	regulation of neurotransmitter levels	8.09083e-05	0.00225236	2.73276	19
GO:1902609	BP	(R)-2-hydroxy-alpha-linolenic acid biosynthetic process	8.60284e-05	0.00227975	14.5987	4
GO:0001561	BP	fatty acid alpha-oxidation	8.60284e-05	0.00227975	14.5987	4
GO:0045487	BP	gibberellin catabolic process	8.44295e-05	0.00227975	4.86623	9
GO:0016103	BP	diterpenoid catabolic process	8.44295e-05	0.00227975	4.86623	9
GO:0042445	BP	hormone metabolic process	8.33544e-05	0.00227975	1.71569	56
GO:0006082	BP	organic acid metabolic process	8.76602e-05	0.00230087	1.32317	181
GO:0031098	BP	stress-activated protein kinase signaling cascade	9.86989e-05	0.00251865	3.12829	15
GO:0009813	BP	flavonoid biosynthetic process	9.73162e-05	0.00251865	1.98322	36
GO:0043436	BP	oxoacid metabolic process	9.77958e-05	0.00251865	1.32148	180
GO:0006952	BP	defense response	9.98613e-05	0.00252493	1.21702	331
GO:2000469	BP	negative regulation of peroxidase activity	0.000105723	0.00264885	9.73245	5
GO:1903825	BP	organic acid transmembrane transport	0.000112453	0.00276714	2.35147	24
GO:1905039	BP	carboxylic acid transmembrane transport	0.000112453	0.00276714	2.35147	24
GO:0046148	BP	pigment biosynthetic process	0.000117963	0.00287704	2.08553	31
GO:0043449	BP	cellular alkene metabolic process	0.000132886	0.00307759	4.17105	10
GO:0009692	BP	ethylene metabolic process	0.000132886	0.00307759	4.17105	10
GO:0043450	BP	alkene biosynthetic process	0.000132886	0.00307759	4.17105	10
GO:0009693	BP	ethylene biosynthetic process	0.000132886	0.00307759	4.17105	10
GO:1900674	BP	olefin biosynthetic process	0.000132886	0.00307759	4.17105	10
GO:0016101	BP	diterpenoid metabolic process	0.000130581	0.00307759	2.43311	22
GO:0009635	BP	response to herbicide	0.00015471	0.00355316	3.77848	11
GO:0008300	BP	isoprenoid catabolic process	0.000164226	0.00374055	3.50368	12
GO:0032147	BP	activation of protein kinase activity	0.000165586	0.00374062	2.866	16
GO:0009698	BP	phenylpropanoid metabolic process	0.000168721	0.00378045	1.75933	47
GO:0010072	BP	primary shoot apical meristem specification	0.000191105	0.00421348	5.67726	7
GO:1900673	BP	olefin metabolic process	0.000189681	0.00421348	3.99964	10
GO:0019695	BP	choline metabolic process	0.000205726	0.00442719	8.58746	5
GO:0043693	BP	monoterpene biosynthetic process	0.000208103	0.00442719	4.86623	8
GO:0043692	BP	monoterpene metabolic process	0.000208103	0.00442719	4.86623	8
GO:0042128	BP	nitrate assimilation	0.000204348	0.00442719	2.8142	16
GO:0009617	BP	response to bacterium	0.00020883	0.00442719	1.42426	106
GO:0019354	BP	siroheme biosynthetic process	0.000244229	0.00502311	11.6789	4
GO:0009236	BP	cobalamin biosynthetic process	0.000244229	0.00502311	11.6789	4
GO:0009235	BP	cobalamin metabolic process	0.000244229	0.00502311	11.6789	4
GO:0046156	BP	siroheme metabolic process	0.000244229	0.00502311	11.6789	4
GO:0051704	BP	multi-organism process	0.000248275	0.00506849	1.26998	209
GO:2001141	BP	regulation of RNA biosynthetic process	0.000259628	0.00526128	1.26972	208
GO:0015718	BP	monocarboxylic acid transport	0.000264814	0.0053272	2.86249	15
GO:2000468	BP	regulation of peroxidase activity	0.00027682	0.00552837	8.11038	5
GO:0044282	BP	small molecule catabolic process	0.00029792	0.00590697	1.73794	45
GO:0042126	BP	nitrate metabolic process	0.00030601	0.00602402	2.71603	16
GO:1903506	BP	regulation of nucleic acid-templated transcription	0.000312613	0.00611037	1.26599	207
GO:0015743	BP	malate transport	0.00032067	0.00622372	4.57998	8
GO:0061408	BP	positive regulation of transcription from RNA polymerase II promoter in response to heat stress	0.000329166	0.00634393	3.74325	10
GO:0055081	BP	anion homeostasis	0.000341612	0.00653807	2.91974	14
GO:0015740	BP	C4-dicarboxylate transport	0.000362267	0.00688558	4.04271	9
GO:0071941	BP	nitrogen cycle metabolic process	0.00037148	0.00701232	2.66947	16
GO:1902457	BP	negative regulation of stomatal opening	0.000380998	0.00714307	17.5184	3
GO:1901615	BP	organic hydroxy compound metabolic process	0.000401619	0.00747881	1.58916	59
GO:0051453	BP	regulation of intracellular pH	0.000414803	0.00762132	3.38075	11
GO:0030641	BP	regulation of cellular pH	0.000414803	0.00762132	3.38075	11
GO:0009605	BP	response to external stimulus	0.000432233	0.00788896	1.23376	242
GO:0010336	BP	gibberellic acid homeostasis	0.000443323	0.00803815	4.98491	7
GO:0036003	BP	positive regulation of transcription from RNA polymerase II promoter in response to stress	0.000447942	0.00806881	3.60461	10
GO:0010500	BP	transmitting tissue development	0.0004731	0.00846665	7.29934	5
GO:0042136	BP	neurotransmitter biosynthetic process	0.000488341	0.00868302	2.81906	14
GO:0042214	BP	terpene metabolic process	0.000496583	0.00877297	3.31104	11
GO:0042133	BP	neurotransmitter metabolic process	0.00057272	0.0100536	2.5668	16
GO:0044242	BP	cellular lipid catabolic process	0.00057726	0.0100692	2.0678	25
GO:0051354	BP	negative regulation of oxidoreductase activity	0.000603483	0.0104604	6.95175	5
GO:0006355	BP	regulation of transcription, DNA-templated	0.000610604	0.0105177	1.25158	204
GO:0009739	BP	response to gibberellin	0.000619539	0.0106053	2.13187	23
GO:0009812	BP	flavonoid metabolic process	0.000633446	0.0107764	1.77974	37
GO:0062012	BP	regulation of small molecule metabolic process	0.000638545	0.0107965	1.99073	27
GO:0043620	BP	regulation of DNA-templated transcription in response to stress	0.000651887	0.0109549	3.02042	12
GO:0055062	BP	phosphate ion homeostasis	0.000675745	0.011219	5.4745	6
GO:0072506	BP	trivalent inorganic anion homeostasis	0.000675745	0.011219	5.4745	6
GO:0045860	BP	positive regulation of protein kinase activity	0.000684028	0.0112885	2.52518	16
GO:2001057	BP	reactive nitrogen species metabolic process	0.000725011	0.0118936	2.5116	16
GO:0006808	BP	regulation of nitrogen utilization	0.000742513	0.0121087	14.5987	3
GO:0042440	BP	pigment metabolic process	0.000752617	0.0122013	1.85013	32
GO:0009651	BP	response to salt stress	0.00081433	0.0131245	1.38568	99
GO:0010035	BP	response to inorganic substance	0.000831387	0.0133215	1.31278	137
GO:0016115	BP	terpenoid catabolic process	0.000861794	0.0137289	3.59967	9
GO:0009685	BP	gibberellin metabolic process	0.000888402	0.0140715	2.65431	14
GO:0080050	BP	regulation of seed development	0.000951676	0.0149659	3.55103	9
GO:0048878	BP	chemical homeostasis	0.00096116	0.0149659	1.47916	69
GO:0051186	BP	cofactor metabolic process	0.000956312	0.0149659	1.35599	109
GO:0042538	BP	hyperosmotic salinity response	0.00102884	0.0159297	2.73069	13
GO:0050801	BP	ion homeostasis	0.00109386	0.0168418	1.60352	48
GO:0033674	BP	positive regulation of kinase activity	0.00113487	0.0173762	2.40803	16
GO:0006857	BP	oligopeptide transport	0.00117351	0.0178684	2.69196	13
GO:0042742	BP	defense response to bacterium	0.0011905	0.0180276	1.38676	92
GO:0010373	BP	negative regulation of gibberellin biosynthetic process	0.00126623	0.018966	12.5132	3
GO:0016114	BP	terpenoid biosynthetic process	0.00126092	0.018966	1.77443	33
GO:0072505	BP	divalent inorganic anion homeostasis	0.00129247	0.019249	4.86623	6
GO:0008299	BP	isoprenoid biosynthetic process	0.0012991	0.019249	1.70934	37
GO:0090421	BP	embryonic meristem initiation	0.00133528	0.0196793	4.17105	7
GO:0046246	BP	terpene biosynthetic process	0.00135796	0.0199071	3.7076	8
GO:0098656	BP	anion transmembrane transport	0.00140654	0.0205101	1.86225	28
GO:0010817	BP	regulation of hormone levels	0.00150415	0.0218181	1.42518	76
GO:0006972	BP	hyperosmotic response	0.00153476	0.0221456	2.50775	14
GO:0010120	BP	camalexin biosynthetic process	0.00169221	0.0239165	5.61488	5
GO:0009700	BP	indole phytoalexin biosynthetic process	0.00169221	0.0239165	5.61488	5
GO:0052317	BP	camalexin metabolic process	0.00169221	0.0239165	5.61488	5
GO:0046217	BP	indole phytoalexin metabolic process	0.00169221	0.0239165	5.61488	5
GO:0071732	BP	cellular response to nitric oxide	0.00179518	0.0252424	7.29934	4
GO:0030004	BP	cellular monovalent inorganic cation homeostasis	0.00189787	0.0264168	2.81729	11
GO:0016036	BP	cellular response to phosphate starvation	0.00189787	0.0264168	2.81729	11
GO:0080134	BP	regulation of response to stress	0.0019269	0.0266861	1.41158	76
GO:0098542	BP	defense response to other organism	0.00197405	0.0272024	1.26797	149
GO:0071071	BP	regulation of phospholipid biosynthetic process	0.00201873	0.0276688	5.40692	5
GO:0043405	BP	regulation of MAP kinase activity	0.00202797	0.0276688	3.48625	8
GO:0000187	BP	activation of MAPK activity	0.0021283	0.028753	3.85625	7
GO:0043406	BP	positive regulation of MAP kinase activity	0.0021283	0.028753	3.85625	7
GO:0009718	BP	anthocyanin-containing compound biosynthetic process	0.00215346	0.0289509	2.41872	14
GO:0080187	BP	floral organ senescence	0.00226723	0.0303325	4.3796	6
GO:0015893	BP	drug transport	0.00254873	0.0339339	1.91322	23
GO:0046885	BP	regulation of hormone biosynthetic process	0.00257999	0.0341849	2.57624	12
GO:0018158	BP	protein oxidation	0.00288622	0.0366563	9.73245	3
GO:0003032	BP	detection of oxygen	0.00288622	0.0366563	9.73245	3
GO:0032107	BP	regulation of response to nutrient levels	0.00288622	0.0366563	9.73245	3
GO:0070483	BP	detection of hypoxia	0.00288622	0.0366563	9.73245	3
GO:0033206	BP	meiotic cytokinesis	0.00288622	0.0366563	9.73245	3
GO:0032104	BP	regulation of response to extracellular stimulus	0.00288622	0.0366563	9.73245	3
GO:0018171	BP	peptidyl-cysteine oxidation	0.00288622	0.0366563	9.73245	3
GO:0048364	BP	root development	0.00279459	0.0366563	1.6106	39
GO:0006468	BP	protein phosphorylation	0.00281162	0.0366563	1.27708	131
GO:0052315	BP	phytoalexin biosynthetic process	0.00293041	0.0368777	3.64967	7
GO:0052314	BP	phytoalexin metabolic process	0.00293041	0.0368777	3.64967	7
GO:0042537	BP	benzene-containing compound metabolic process	0.00307915	0.0385733	2.18298	16
GO:0023014	BP	signal transduction by protein phosphorylation	0.00312456	0.0389651	2.24595	15
GO:0090501	BP	RNA phosphodiester bond hydrolysis	0.00322861	0.0400813	2.40231	13
GO:0033611	BP	oxalate catabolic process	0.00343754	0.0419197	19.4649	2
GO:0033609	BP	oxalate metabolic process	0.00343754	0.0419197	19.4649	2
GO:0048314	BP	embryo sac morphogenesis	0.00343754	0.0419197	19.4649	2
GO:0010055	BP	atrichoblast differentiation	0.00343754	0.0419197	19.4649	2
GO:0015697	BP	quaternary ammonium group transport	0.0035225	0.0423931	6.14681	4
GO:0009593	BP	detection of chemical stimulus	0.0035225	0.0423931	6.14681	4
GO:0006836	BP	neurotransmitter transport	0.00349175	0.0423931	3.19971	8
GO:0009415	BP	response to water	0.00355405	0.0425868	1.36232	81
GO:0043410	BP	positive regulation of MAPK cascade	0.00358143	0.0427291	3.52382	7
GO:0048462	BP	carpel formation	0.0040185	0.047737	8.75921	3
GO:0045937	BP	positive regulation of phosphate metabolic process	0.00410437	0.0483404	1.9742	19
GO:0010562	BP	positive regulation of phosphorus metabolic process	0.00410437	0.0483404	1.9742	19
GO:0043408	BP	regulation of MAPK cascade	0.00412807	0.0484126	3.11438	8
GO:0016021	CC	integral component of membrane	8.49501e-06	0.00242218	1.14682	740
GO:0031224	CC	intrinsic component of membrane	1.28498e-05	0.00242218	1.13949	767
GO:0005886	CC	plasma membrane	2.05866e-05	0.00258705	1.18352	503
GO:0005773	CC	vacuole	0.000140148	0.013209	1.45133	102
GO:0009344	CC	nitrite reductase complex [NAD(P)H]	0.00054485	0.0410817	9.73245	4
GO:0003700	MF	DNA-binding transcription factor activity	4.08976e-22	4.80138e-19	1.84202	268
GO:0140110	MF	transcription regulator activity	1.26722e-18	7.43859e-16	1.72533	272
GO:0003824	MF	catalytic activity	5.14888e-18	2.01493e-15	1.16764	1489
GO:0004364	MF	glutathione transferase activity	1.27685e-15	3.74755e-13	3.96612	47
GO:0050738	MF	fructosyltransferase activity	8.08107e-15	1.5812e-12	12.1062	17
GO:0050306	MF	sucrose 1F-fructosyltransferase activity	8.08107e-15	1.5812e-12	12.1062	17
GO:0016765	MF	transferase activity, transferring alkyl or aryl (other than methyl) groups	2.304e-12	3.86413e-10	2.76752	60
GO:0004575	MF	sucrose alpha-glucosidase activity	5.66158e-12	8.30837e-10	7.96292	18
GO:0015926	MF	glucosidase activity	6.17731e-11	8.05796e-09	2.80427	51
GO:0016758	MF	transferase activity, transferring hexosyl groups	2.51852e-10	2.95674e-08	1.80587	125
GO:0005342	MF	organic acid transmembrane transporter activity	4.90007e-10	4.42514e-08	2.80979	46
GO:0046943	MF	carboxylic acid transmembrane transporter activity	4.90007e-10	4.42514e-08	2.80979	46
GO:0016491	MF	oxidoreductase activity	4.22347e-10	4.42514e-08	1.36945	362
GO:0004564	MF	beta-fructofuranosidase activity	7.21107e-10	6.047e-08	5.15247	21
GO:0000014	MF	single-stranded DNA endodeoxyribonuclease activity	2.12056e-09	1.65969e-07	9.46941	12
GO:0016757	MF	transferase activity, transferring glycosyl groups	3.42223e-09	2.51106e-07	1.66373	142
GO:0048037	MF	cofactor binding	4.59798e-09	3.17531e-07	1.42165	266
GO:0090599	MF	alpha-glucosidase activity	5.05796e-09	3.29891e-07	5.41807	18
GO:0043565	MF	sequence-specific DNA binding	1.24929e-08	7.71928e-07	1.58311	158
GO:0016740	MF	transferase activity	2.43364e-08	1.42855e-06	1.20493	678
GO:0004553	MF	hydrolase activity, hydrolyzing O-glycosyl compounds	3.47953e-08	1.94522e-06	1.80022	96
GO:0004674	MF	protein serine/threonine kinase activity	1.31051e-07	6.99334e-06	1.36608	268
GO:0004497	MF	monooxygenase activity	1.55833e-07	7.95428e-06	1.66799	111
GO:0008514	MF	organic anion transmembrane transporter activity	1.72546e-07	8.44038e-06	2.29478	47
GO:1900750	MF	oligopeptide binding	4.00491e-07	1.80837e-05	4.57998	16
GO:0043295	MF	glutathione binding	4.00491e-07	1.80837e-05	4.57998	16
GO:0016798	MF	hydrolase activity, acting on glycosyl bonds	7.58355e-07	3.29744e-05	1.66602	99
GO:0004672	MF	protein kinase activity	1.08191e-06	4.53629e-05	1.32283	278
GO:0005310	MF	dicarboxylic acid transmembrane transporter activity	1.26222e-06	5.10983e-05	4.46898	15
GO:0008509	MF	anion transmembrane transporter activity	1.60826e-06	6.29365e-05	1.91099	61
GO:0000234	MF	phosphoethanolamine N-methyltransferase activity	2.41111e-06	9.13109e-05	18.2483	5
GO:0015171	MF	amino acid transmembrane transporter activity	2.63595e-06	9.67064e-05	2.68923	28
GO:0072341	MF	modified amino acid binding	2.93804e-06	0.000101449	3.95896	16
GO:0020037	MF	heme binding	2.88e-06	0.000101449	1.50373	132
GO:0043765	MF	T/G mismatch-specific endonuclease activity	3.80181e-06	0.000127524	12.5132	6
GO:0016420	MF	malonyltransferase activity	4.22053e-06	0.000137636	8.05444	8
GO:0016701	MF	oxidoreductase activity, acting on single donors with incorporation of molecular oxygen	4.4617e-06	0.000141569	3.12829	21
GO:0033949	MF	fructan beta-(2,6)-fructosidase activity	6.15169e-06	0.000190055	11.6789	6
GO:0004724	MF	magnesium-dependent protein serine/threonine phosphatase activity	8.60022e-06	0.000258889	2.75881	24
GO:0015140	MF	malate transmembrane transporter activity	9.43712e-06	0.000276979	7.29934	8
GO:0003993	MF	acid phosphatase activity	1.54223e-05	0.000441604	3.08194	19
GO:0016773	MF	phosphotransferase activity, alcohol group as acceptor	1.60172e-05	0.000447719	1.27022	288
GO:0047787	MF	delta4-3-oxosteroid 5beta-reductase activity	1.82449e-05	0.000498129	13.2715	5
GO:0032791	MF	lead ion binding	1.94831e-05	0.000507647	19.4649	4
GO:0050736	MF	O-malonyltransferase activity	2.03232e-05	0.000507647	7.86083	7
GO:0008422	MF	beta-glucosidase activity	1.95575e-05	0.000507647	2.23035	33
GO:0046527	MF	glucosyltransferase activity	2.0018e-05	0.000507647	1.73342	64
GO:0016705	MF	oxidoreductase activity, acting on paired donors, with incorporation or reduction of molecular oxygen	2.72477e-05	0.000666434	1.49659	108
GO:0016984	MF	ribulose-bisphosphate carboxylase activity	2.9741e-05	0.000698319	6.31294	8
GO:0030410	MF	nicotianamine synthase activity	2.9741e-05	0.000698319	6.31294	8
GO:0016664	MF	oxidoreductase activity, acting on other nitrogenous compounds as donors, iron-sulfur protein as acceptor	4.0131e-05	0.000812307	29.1974	3
GO:0048307	MF	ferredoxin-nitrite reductase activity	4.0131e-05	0.000812307	29.1974	3
GO:0043115	MF	precorrin-2 dehydrogenase activity	4.0131e-05	0.000812307	29.1974	3
GO:0004851	MF	uroporphyrin-III C-methyltransferase activity	4.0131e-05	0.000812307	29.1974	3
GO:0098809	MF	nitrite reductase activity	4.0131e-05	0.000812307	29.1974	3
GO:0015556	MF	C4-dicarboxylate transmembrane transporter activity	3.65421e-05	0.000812307	6.14681	8
GO:0045551	MF	cinnamyl-alcohol dehydrogenase activity	3.80378e-05	0.000812307	5.36278	9
GO:0052747	MF	sinapyl alcohol dehydrogenase activity	3.80378e-05	0.000812307	5.36278	9
GO:0005506	MF	iron ion binding	4.09247e-05	0.000814333	1.50032	102
GO:0046906	MF	tetrapyrrole binding	4.69988e-05	0.00091961	1.41466	133
GO:0016616	MF	oxidoreductase activity, acting on the CH-OH group of donors, NAD or NADP as acceptor	4.93618e-05	0.000950013	1.81576	50
GO:0050662	MF	coenzyme binding	5.98427e-05	0.00113315	1.48217	103
GO:0016614	MF	oxidoreductase activity, acting on CH-OH group of donors	6.32378e-05	0.00117843	1.7436	55
GO:0015238	MF	drug transmembrane transporter activity	8.17234e-05	0.00149911	2.09959	32
GO:1901681	MF	sulfur compound binding	9.2118e-05	0.00166379	2.79549	18
GO:0035251	MF	UDP-glucosyltransferase activity	0.000120382	0.00214134	1.7194	53
GO:0008194	MF	UDP-glycosyltransferase activity	0.00012306	0.00215631	1.58366	71
GO:0008309	MF	double-stranded DNA exodeoxyribonuclease activity	0.000126884	0.00215886	7.29934	6
GO:0016661	MF	oxidoreductase activity, acting on other nitrogenous compounds as donors	0.000126884	0.00215886	7.29934	6
GO:0047274	MF	galactinol-sucrose galactosyltransferase activity	0.000150635	0.00242479	12.9766	4
GO:0035671	MF	enone reductase activity	0.000149436	0.00242479	9.12417	5
GO:0016791	MF	phosphatase activity	0.000150775	0.00242479	1.62938	62
GO:0016301	MF	kinase activity	0.000146205	0.00242479	1.22927	290
GO:0010328	MF	auxin influx transmembrane transporter activity	0.000162119	0.00256949	7.00737	6
GO:0004520	MF	endodeoxyribonuclease activity	0.00016415	0.00256949	3.30057	13
GO:0016702	MF	oxidoreductase activity, acting on single donors with incorporation of molecular oxygen, incorporation of two atoms of oxygen	0.000190634	0.00290655	2.83126	16
GO:0042578	MF	phosphoric ester hydrolase activity	0.000189205	0.00290655	1.57146	69
GO:0005388	MF	calcium-transporting ATPase activity	0.000208103	0.00313221	4.86623	8
GO:0051266	MF	sirohydrochlorin ferrochelatase activity	0.000244229	0.00362943	11.6789	4
GO:0004722	MF	protein serine/threonine phosphatase activity	0.000258404	0.00379208	2.22456	24
GO:0008028	MF	monocarboxylic acid transmembrane transporter activity	0.000294523	0.00426877	2.96205	14
GO:0016628	MF	oxidoreductase activity, acting on the CH-CH group of donors, NAD or NADP as acceptor	0.000300138	0.00429709	2.62622	17
GO:0045549	MF	9-cis-epoxycarotenoid dioxygenase activity	0.000365101	0.0051642	7.68352	5
GO:0015075	MF	ion transmembrane transporter activity	0.000389005	0.00543681	1.35359	128
GO:0004708	MF	MAP kinase kinase activity	0.000443323	0.00612308	4.98491	7
GO:0010277	MF	chlorophyllide a oxygenase [overall] activity	0.0004731	0.00638413	7.29934	5
GO:0052634	MF	C-19 gibberellin 2-beta-dioxygenase activity	0.0004731	0.00638413	7.29934	5
GO:0000978	MF	RNA polymerase II proximal promoter sequence-specific DNA binding	0.000548275	0.00731448	2.91974	13
GO:0080044	MF	quercetin 7-O-glucosyltransferase activity	0.000554767	0.00731793	2.19229	22
GO:0080043	MF	quercetin 3-O-glucosyltransferase activity	0.000580595	0.00757354	2.18484	22
GO:0000987	MF	proximal promoter sequence-specific DNA binding	0.000645059	0.00832198	2.4572	17
GO:0015318	MF	inorganic molecular entity transmembrane transporter activity	0.00068621	0.00875663	1.3368	126
GO:0043813	MF	phosphatidylinositol-3,5-bisphosphate 5-phosphatase activity	0.000742513	0.00917251	14.5987	3
GO:0070492	MF	oligosaccharide binding	0.000765678	0.00917251	8.9838	4
GO:0048030	MF	disaccharide binding	0.000765678	0.00917251	8.9838	4
GO:0004030	MF	aldehyde dehydrogenase [NAD(P)+] activity	0.000765678	0.00917251	8.9838	4
GO:0050269	MF	coniferyl-aldehyde dehydrogenase activity	0.000765678	0.00917251	8.9838	4
GO:0016703	MF	oxidoreductase activity, acting on single donors with incorporation of molecular oxygen, incorporation of one atom of oxygen (internal monooxygenases or internal mixed function oxidases)	0.000759037	0.00917251	6.63576	5
GO:0051213	MF	dioxygenase activity	0.000868979	0.0103049	1.67175	43
GO:0015085	MF	calcium ion transmembrane transporter activity	0.00089457	0.0105023	2.38632	17
GO:0015179	MF	L-amino acid transmembrane transporter activity	0.00122584	0.0142488	3.17363	10
GO:0047890	MF	flavanone 4-reductase activity	0.00126623	0.0145741	12.5132	3
GO:0003883	MF	CTP synthase activity	0.00138374	0.015772	7.78596	4
GO:0018685	MF	alkane 1-monooxygenase activity	0.00140614	0.0158732	5.83947	5
GO:0004805	MF	trehalose-phosphatase activity	0.00172826	0.0193236	4.61011	6
GO:0004325	MF	ferrochelatase activity	0.00179518	0.0198824	7.29934	4
GO:0046577	MF	long-chain-alcohol oxidase activity	0.00197436	0.0216626	10.949	3
GO:0010436	MF	carotenoid dioxygenase activity	0.00201873	0.0218342	5.40692	5
GO:0030246	MF	carbohydrate binding	0.00202719	0.0218342	1.32659	108
GO:0015180	MF	L-alanine transmembrane transporter activity	0.00226723	0.0235551	4.3796	6
GO:0022858	MF	alanine transmembrane transporter activity	0.00226723	0.0235551	4.3796	6
GO:0015175	MF	neutral amino acid transmembrane transporter activity	0.00223043	0.0235551	3.43498	8
GO:0022857	MF	transmembrane transporter activity	0.00223342	0.0235551	1.22475	193
GO:0034007	MF	S-linalool synthase activity	0.00238892	0.0246017	5.21381	5
GO:0015172	MF	acidic amino acid transmembrane transporter activity	0.00244841	0.024995	3.3852	8
GO:0019139	MF	cytokinin dehydrogenase activity	0.0025799	0.025903	4.27278	6
GO:0044212	MF	transcription regulatory region DNA binding	0.00260354	0.025903	1.43273	66
GO:0001067	MF	regulatory region nucleic acid binding	0.00260354	0.025903	1.43273	66
GO:0046857	MF	oxidoreductase activity, acting on other nitrogenous compounds as donors, with NAD or NADP as acceptor	0.00288622	0.0271073	9.73245	3
GO:0046509	MF	1,2-diacylglycerol 3-beta-galactosyltransferase activity	0.00288622	0.0271073	9.73245	3
GO:0045552	MF	dihydrokaempferol 4-reductase activity	0.00288622	0.0271073	9.73245	3
GO:0106018	MF	phosphatidylinositol-3,5-bisphosphate phosphatase activity	0.00288622	0.0271073	9.73245	3
GO:0050464	MF	nitrate reductase (NADPH) activity	0.00288622	0.0271073	9.73245	3
GO:0042910	MF	xenobiotic transmembrane transporter activity	0.00285779	0.0271073	6.4883	4
GO:0008559	MF	xenobiotic transmembrane transporting ATPase activity	0.00285779	0.0271073	6.4883	4
GO:0005326	MF	neurotransmitter transporter activity	0.00320354	0.0298488	3.24415	8
GO:0050203	MF	oxalate-CoA ligase activity	0.00343754	0.0312843	19.4649	2
GO:0004451	MF	isocitrate lyase activity	0.00343754	0.0312843	19.4649	2
GO:0034480	MF	phosphatidylcholine phospholipase C activity	0.00343754	0.0312843	19.4649	2
GO:0140096	MF	catalytic activity, acting on a protein	0.00378623	0.0341926	1.12298	452
GO:0004616	MF	phosphogluconate dehydrogenase (decarboxylating) activity	0.0040185	0.0360131	8.75921	3
GO:0005313	MF	L-glutamate transmembrane transporter activity	0.0043369	0.0385721	3.40636	7
GO:0016627	MF	oxidoreductase activity, acting on the CH-CH group of donors	0.00442689	0.0390765	1.96025	19
GO:0005509	MF	calcium ion binding	0.00471153	0.0412787	1.39538	66
GO:0016772	MF	transferase activity, transferring phosphorus-containing groups	0.00524152	0.0455818	1.15355	296
GO:0015276	MF	ligand-gated ion channel activity	0.00555463	0.0475995	2.58384	10
GO:0022834	MF	ligand-gated channel activity	0.00555463	0.0475995	2.58384	10
GO:0043167	MF	ion binding	0.00563923	0.0479743	1.06273	1053
GO:0004521	MF	endoribonuclease activity	0.00585545	0.0494554	2.16277	14
