# Supplementary material for: Transcriptome Analysis Reveals Different Responsive Patterns to Nitrogen Deficiency in Two Wheat Near-Isogenic Lines Contrasting for Nitrogen Use Efficiency
Source: Biology (Basel). 2021 Nov 3;10(11):1126. doi: 10.3390/biology10111126 (PMC8614915; doi:10.3390/biology10111126)
Supplement: Supplementary file 1 [file biology-10-01126-s001.zip › Table S4.xlsx]

## Sheet: Sheet1
Table S4: Classification of N-Responsive Genes in 1Y revealed different responses to N deficit conditions.
Frontloaded Genes
Gene	Description
TraesCS1A02G107700	Protein REVEILLE 6
TraesCS1A02G117900	UDP-glycosyltransferase 73C2
TraesCS1A02G278800	Uncharacterized acetyltransferase At3g50280
TraesCS1A02G391100	Mitogen-activated protein kinase kinase 9
TraesCS1B02G129800	Protein REVEILLE 5
TraesCS1B02G244800	Beta-glucosidase 22
TraesCS1B02G287800	Uncharacterized acetyltransferase At3g50280
TraesCS1B02G419300	Mitogen-activated protein kinase kinase 9
TraesCS1D02G187500	RHOMBOID-like protein 2
TraesCS1D02G278100	Uncharacterized acetyltransferase At3g50280
TraesCS1D02G399400	Mitogen-activated protein kinase kinase 9
TraesCS1D02G430700	Glucan endo-1,3-beta-glucosidase 13
TraesCS2A02G067200	Ribulose bisphosphate carboxylase small chain PW9, chloroplastic
TraesCS2A02G399300	.
TraesCS2A02G424861	.
TraesCS2A02G453300	Receptor-like protein kinase FERONIA
TraesCS2A02G532200	.
TraesCS2B02G245900	Glucose-6-phosphate/phosphate translocator 2, chloroplastic
TraesCS2B02G247300	18.8 kDa class V heat shock protein
TraesCS2B02G418600	Cytochrome P450 87A3
TraesCS2D02G029700	Cytochrome P450 99A2
TraesCS2D02G079100	Transcription factor BHLH062
TraesCS2D02G107900	Peroxidase
TraesCS2D02G142400	Probable galacturonosyltransferase-like 4
TraesCS2D02G260300	Peroxidase 51
TraesCS2D02G270100	LOB domain-containing protein 41
TraesCS2D02G397900	Probable methyltransferase PMT15
TraesCS2D02G422800	.
TraesCS2D02G452900	Receptor-like protein kinase FERONIA
TraesCS2D02G454900	.
TraesCS2D02G493200	.
TraesCS3A02G009100	Putative serine/threonine-protein kinase-like protein CCR3
TraesCS3A02G255600	Mitogen-activated protein kinase kinase kinase 17
TraesCS3B02G344600	Cytokinin dehydrogenase 5
TraesCS3D02G118300	.
TraesCS3D02G219800	.
TraesCS3D02G360900	Protein ENHANCED PSEUDOMONAS SUSCEPTIBILTY 1
TraesCS3D02G402300	Amino acid permease 3
TraesCS4A02G109200	Probable 2-oxoglutarate-dependent dioxygenase At3g111800
TraesCS4A02G110300	Mitogen-activated protein kinase kinase kinase 17
TraesCS4B02G064900	.
TraesCS4B02G135200	Cytochrome P450 94C1
TraesCS4B02G237600	Allene oxide synthase 2
TraesCS4B02G239400	Mitogen-activated protein kinase kinase 9
TraesCS4D02G035400	.
TraesCS4D02G056900	Transcription factor bHLH25
TraesCS4D02G078600	Protein tas
TraesCS4D02G239400	Mitogen-activated protein kinase kinase 9
TraesCS4D02G284600	Amino acid transporter AVT1J
TraesCS4D02G290400	Cytochrome P450 716B1
TraesCS4D02G298700	.
TraesCS4D02G303800	Alcohol dehydrogenase-like 7
TraesCS5A02G129500	Cytochrome P450 94C1
TraesCS5A02G377900	CBL-interacting protein kinase 7
TraesCS5A02G496000	NADPH-dependent aldehyde reductase-like protein, chloroplastic
TraesCS5A02G533500	Transcription factor bHLH167
TraesCS5B02G377900	IQ domain-containing protein IQM2
TraesCS5D02G137000	Cytochrome P450 94C1
TraesCS5D02G322200	Subtilisin-like protease SBT1.4
TraesCS5D02G387900	CBL-interacting protein kinase 7
TraesCS5D02G414000	.
TraesCS6A02G067700	S-(+)-linalool synthase, chloroplastic
TraesCS6B02G091500	S-(+)-linalool synthase, chloroplastic
TraesCS6B02G271500	Amino acid transporter AVT3B
TraesCS6B02G347100	Protein EXORDIUM
TraesCS6B02G365700	Zinc finger protein 8
TraesCS6B02G379500	Mitogen-activated protein kinase kinase 5
TraesCS6B02G413600	Phosphoenolpyruvate carboxylase kinase 1
TraesCS6D02G240300	E3 ubiquitin-protein ligase RHA2B
TraesCS6D02G296100	Protein EXORDIUM
TraesCS6D02G296200	Protein EXORDIUM
TraesCS6D02G298700	Ethylene-responsive transcription factor ERF112
TraesCS6D02G314600	Zinc finger protein 8
TraesCS6D02G333800	Receptor like protein 22
TraesCS6D02G367100	E3 ubiquitin-protein ligase PUB23
TraesCS6D02G367600	E3 ubiquitin-protein ligase PUB23
TraesCS6D02G380800	.
TraesCS6D02G380900	.
TraesCS7A02G201100	Protein TIFY 11e
TraesCS7A02G201200	Protein TIFY 11e
TraesCS7A02G201300	Protein TIFY 11e
TraesCS7A02G201400	Protein TIFY 11e
TraesCS7A02G201600	Protein TIFY 11e
TraesCS7A02G394100	Probable glucomannan 4-beta-mannosyltransferase 9
TraesCS7A02G449400	.
TraesCS7A02G489000	Aspartyl protease family protein At5g10770
TraesCS7A02G506100	.
TraesCS7A02G508800	WRKY transcription factor WRKY28
TraesCS7B02G107700	Protein TIFY 11e
TraesCS7B02G107900	Protein TIFY 11e
TraesCS7B02G108000	Protein TIFY 11e
TraesCS7B02G108400	Protein TIFY 11e
TraesCS7B02G108500	Protein TIFY 11e
TraesCS7B02G237100	.
TraesCS7B02G271200	Amino acid permease 1
TraesCS7B02G378300	Probable LRR receptor-like serine/threonine-protein kinase At3g47570
TraesCS7B02G418500	WRKY transcription factor WRKY28
TraesCS7D02G204300	Protein TIFY 11d
TraesCS7D02G204400	Protein TIFY 11e
TraesCS7D02G204500	Protein TIFY 11e
TraesCS7D02G204700	Protein TIFY 11e
TraesCS7D02G333100	.
TraesCS7D02G497800	WRKY transcription factor WRKY28
Relatively Upregulated Genes
TraesCS1A02G076700	Geraniol 8-hydroxylase
TraesCS1D02G232700	Beta-glucosidase 22
TraesCS1D02G396300	Probable ubiquitin-conjugating enzyme E2 24
TraesCS2A02G157400	Ribonuclease 1
TraesCS2A02G316500	Aspartic proteinase nepenthesin-1
TraesCS2A02G345500	Malate synthase, glyoxysomal
TraesCS2A02G527100	Endonuclease 1
TraesCS2B02G228900	NAC transcription factor NAM-B2
TraesCS2B02G409300	Glutamate dehydrogenase 2, mitochondrial
TraesCS2B02G454500	Putative xyloglucan endotransglucosylase/hydrolase protein 13
TraesCS2B02G509700	Organic cation/carnitine transporter 4
TraesCS2D02G005100	NEP1-interacting protein-like 2
TraesCS2D02G058400	Secoisolariciresinol dehydrogenase (Fragment)
TraesCS2D02G214100	NAC transcription factor NAM-B2
TraesCS2D02G288900	Heparan-alpha-glucosaminide N-acetyltransferase
TraesCS2D02G306000	Glycolipid transfer protein 3
TraesCS2D02G306700	Serine/threonine-protein kinase-like protein CCR4
TraesCS2D02G378800	Protein CUP-SHAPED COTYLEDON 1
TraesCS3B02G106200	Ankyrin-3
TraesCS3B02G213600	Tonoplast dicarboxylate transporter
TraesCS3D02G215500	Leucine-rich repeat extensin-like protein 4
TraesCS3D02G219400	.
TraesCS3D02G433800	Phosphatidylinositol transfer protein 3
TraesCS4A02G228600	F-box/kelch-repeat protein At2g44130
TraesCS4B02G103000	Probable monogalactosyldiacylglycerol synthase 2, chloroplastic
TraesCS4D02G099600	Probable monogalactosyldiacylglycerol synthase 2, chloroplastic
TraesCS4D02G359800	Tryptamine benzoyltransferase 1
TraesCS5B02G228800	.
TraesCS5D02G153500	Metacaspase-9
TraesCS5D02G218400	Aldehyde dehydrogenase family 7 member A1
TraesCS6B02G380900	Glutamate receptor 2.8
TraesCS6D02G300600	Protein SRG1
TraesCS6D02G331400	Amino acid transporter AVT1A
TraesCS6D02G333600	Dehydrin DHN3
TraesCS7A02G370700	Acyl transferase 7
TraesCS7A02G456500	TLC domain-containing protein At5g14285
TraesCS7B02G337100	Protein DMP2
TraesCS7B02G377900	Probable LRR receptor-like serine/threonine-protein kinase At3g47570
TraesCS7B02G455300	12-oxophytodienoate reductase 2
TraesCS7D02G372600	SPX domain-containing protein 1
TraesCS7D02G379100	Heavy metal-associated isoprenylated plant protein 26
TraesCS7D02G393900	Berberine bridge enzyme-like 4
TraesCS7D02G428000	Protein DMP2
