# Supplementary material for: Transcriptome Analysis Reveals Different Responsive Patterns to Nitrogen Deficiency in Two Wheat Near-Isogenic Lines Contrasting for Nitrogen Use Efficiency
Source: Biology (Basel). 2021 Nov 3;10(11):1126. doi: 10.3390/biology10111126 (PMC8614915; doi:10.3390/biology10111126)
Supplement: Supplementary file 1 [file biology-10-01126-s001.zip › Table S5.xlsx]

## Sheet: Sheet1
Table S5: Category of N-Responsive Genes in 1W showed different responses to N deficiency.
Frontloaded Genes
Gene	Description
TraesCS1A02G349900	Chaperone protein dnaJ C76, chloroplastic
TraesCS1A02G439000	3-ketoacyl-CoA synthase 6
TraesCS1D02G202500	CASP-like protein 4B4
TraesCS1D02G256100	WAT1-related protein At5g07050
TraesCS1D02G352600	Chaperone protein dnaJ C76, chloroplastic
TraesCS2A02G136500	(S)-beta-bisabolene synthase
TraesCS2B02G119000	NAC domain-containing protein 10
TraesCS2B02G451600	Probable cation transporter HKT7
TraesCS2B02G451700	Cation transporter HKT4
TraesCS2D02G453800	.
TraesCS2D02G594500	ABC transporter E family member 2
TraesCS3A02G015600	Protein CHROMATIN REMODELING 24
TraesCS3A02G097400	.
TraesCS3A02G249000	Protein phosphatase 2C 50
TraesCS3A02G254000	High-affinity nitrate transporter 2.3
TraesCS3A02G340900	.
TraesCS3A02G531300	.
TraesCS3B02G277900	Protein phosphatase 2C 50
TraesCS3B02G311000	Probable glutamate carboxypeptidase LAMP1
TraesCS3B02G372600	.
TraesCS3B02G598200	Anthocyanidin 5,3-O-glucosyltransferase
TraesCS3D02G036900	Endonuclease 2
TraesCS4A02G131000	NAC transcription factor NAM-B1
TraesCS4A02G242800	Protein JINGUBANG
TraesCS4A02G407500	Ras-related protein RABH1b
TraesCS4B02G254300	Metal transporter Nramp2
TraesCS5A02G143200	NAC domain-containing protein 10
TraesCS5A02G343000	Probable calcium-binding protein CML21
TraesCS5A02G374000	9-cis-epoxycarotenoid dioxygenase NCED3, chloroplastic
TraesCS5B02G517200	IAA-amino acid hydrolase ILR1-like 4
TraesCS5D02G037700	.
TraesCS5D02G095200	CASP-like protein 4C1
TraesCS5D02G188600	Probable protein phosphatase 2C 68
TraesCS5D02G383500	9-cis-epoxycarotenoid dioxygenase NCED3, chloroplastic
TraesCS6A02G008000	Putative Polyprotein CP
TraesCS6A02G247500	Probable BOI-related E3 ubiquitin-protein ligase 2
TraesCS6A02G399700	.
TraesCS6B02G392700	Protein LAZ1 homolog 2
TraesCS6D02G062500	DNA-directed RNA polymerases IV and V subunit 4
TraesCS7A02G196500	Acyl-[acyl-carrier-protein] desaturase 7, chloroplastic
TraesCS7B02G349800	Cytochrome P450 72A15
TraesCS7B02G394000	.
TraesCS7D02G143200	Acyl-coenzyme A oxidase 2, peroxisomal
TraesCS7D02G477100	.
TraesCSU02G127200	Heat stress transcription factor C-2a
Relatively Upregulated Genes
TraesCS1B02G200600	Pectinesterase inhibitor 10
TraesCS1B02G225000	Protein NRT1/ PTR FAMILY 6.3
TraesCS1B02G388700	Phosphoethanolamine N-methyltransferase 1
TraesCS1D02G103500	Phenylalanine ammonia-lyase
TraesCS1D02G207000	Chitinase 8
TraesCS2A02G152500	Cytochrome P450 709B2
TraesCS2B02G079100	Ribulose bisphosphate carboxylase small chain PWS4.3, chloroplastic
TraesCS2B02G322500	PsbP domain-containing protein 2, chloroplastic
TraesCS2D02G054900	UDP-glucosyltransferase UGT13248
TraesCS2D02G065300	Ribulose bisphosphate carboxylase small chain PWS4.3, chloroplastic
TraesCS2D02G206900	Remorin 4.1
TraesCS2D02G394200	1-aminocyclopropane-1-carboxylate synthase
TraesCS2D02G540100	.
TraesCS3A02G368800	Nematode resistance protein-like HSPRO1
TraesCS3A02G404400	Ethylene-responsive transcription factor ERF020
TraesCS3B02G437900	Ethylene-responsive transcription factor ERF020
TraesCS3B02G524700	Glucan endo-1,3-beta-glucosidase GIII
TraesCS3D02G118800	.
TraesCS4A02G052200	Probable beta-D-xylosidase 7
TraesCS4A02G205100	Serine/threonine-protein kinase-like protein CCR4
TraesCS4A02G445600	4-hydroxyphenylacetaldehyde oxime monooxygenase
TraesCS4B02G049800	Receptor-like kinase TMK3
TraesCS4B02G209800	AT-hook motif nuclear-localized protein 22
TraesCS4D02G050200	Receptor-like kinase TMK3
TraesCS4D02G206200	Cysteine-rich repeat secretory protein 55
TraesCS4D02G252100	Probable beta-D-xylosidase 7
TraesCS5A02G111500	NifU-like protein 2, chloroplastic
TraesCS5A02G312000	Dehydration-responsive element-binding protein 1A
TraesCS5A02G316600	Cytochrome P450 78A6
TraesCS5A02G439800	Pathogenesis-related protein 1
TraesCS5B02G068200	.
TraesCS5B02G100800	.
TraesCS5B02G236900	Ethylene-responsive transcription factor ERF109
TraesCS5B02G313000	Dehydration-responsive element-binding protein 1A
TraesCS5D02G068000	Calmodulin-like protein 5
TraesCS5D02G245300	Ethylene-responsive transcription factor ERF109
TraesCS5D02G318800	Dehydration-responsive element-binding protein 1A
TraesCS5D02G403500	UDP-glycosyltransferase 83A1
TraesCS5D02G410800	.
TraesCS6A02G363200	.
TraesCS6B02G398200	.
TraesCS7A02G073000	.
TraesCS7A02G177400	O-fucosyltransferase 7
TraesCS7A02G178800	.
TraesCS7B02G082500	O-fucosyltransferase 7
TraesCS7D02G026000	Ent-kaurenoic acid oxidase 1
TraesCS7D02G068500	.
TraesCS7D02G276300	Chlorophyll a-b binding protein 1B, chloroplastic
TraesCS7D02G305000	Beta-1,3-glucosyltransferase
TraesCS7D02G403500	Type 2 DNA topoisomerase 6 subunit B-like
